# Supplementary material for: Intestinal response to dietary manganese depletion in Drosophila
Source: Royal Society of Chemistry journal article supplement (doi:10.1039/c9mt00218a), 2019-11-26
Supplement: c9mt00218a1.zip [file c9mt00218a1.zip]

## Sheet: Experiment 1
Accession	Peptide count	Unique peptides	Confidence score	Anova (p)	nlog10.anova	q Value	Max fold change	Power	Highest mean condition	Lowest mean condition	Mass	Description	20190508_UDMSE_Control_Manganese_001	20190508_UDMSE_Control_Manganese_002	20190508_UDMSE_Control_Manganese_003	aversge.control	log10.control intensity	CV.CONTROL	COUNT.CONTROL	ID´S	20190508_UDMSE_Experimental_No_Manganese_001	20190508_UDMSE_Experimental_No_Manganese_002	20190508_UDMSE_Experimental_No_Manganese_003	average experimental	log10 experimental	CV EXPERIMENTAL	COUNT. EXPERIMENTAL	ID´S EXPERIMENTAL	ratio (experimental/control)	log2.ratio	T-Test (p)
Q9VD01;Q9VI08	43	37	141.177	1.7471e-05	4.75768	0.000262665	1.31876	1	Control_Manganese	Experimental_No_Manganese	19608.3	LP12095p OS=Drosophila melanogaster OX=7227 GN=Pebp1 PE=1 SV=1	84606.5	83386.4	82698.7	83563.9	4.92202	0.0115628	3	1	62432.4	64463.4	63200	63365.3	4.80185	0.0161845	3	4	0.758286	-0.399186	1.56174e-05
P02574;M9PFZ6	48	28	188.434	0.0245969	1.60912	0.0191148	1.01954	0.747885	Experimental_No_Manganese	Control_Manganese	42186.1	Actin_ larval muscle OS=Drosophila melanogaster OX=7227 GN=Act79B PE=1 SV=2	70476.9	70618.4	71058.5	70718	4.84953	0.00428853	3	2	71876.6	72795.8	71627.8	72100	4.85794	0.00853283	3	1	1.01954	0.0279235	0.0251221
E1JHJ9;Q9VJE5;Q9VJE5-2;E1JHK0;Q7KT48;Q9VJE5-3	14	5	61.5664	0.871119	0.0599225	0.245085	1.00389	0.052125	Experimental_No_Manganese	Control_Manganese	187760	Cytoplasmic linker protein 190_ isoform M OS=Drosophila melanogaster OX=7227 GN=CLIP-190 PE=1 SV=2	61388.9	62472.8	66540.6	63467.5	4.80255	0.0427947	3	3	62759.1	64114.1	64269.9	63714.4	4.80424	0.0130413	3	3	1.00389	0.00560164	0.887606
P07190	69	53	266.682	0.00125283	2.90211	0.00264716	1.22127	0.99991	Experimental_No_Manganese	Control_Manganese	66614.1	Maltase A1 OS=Drosophila melanogaster OX=7227 GN=Mal-A1 PE=2 SV=2	54501.8	51050.5	52112.3	52554.9	4.72061	0.0336351	3	4	65996.5	63945.9	62609.1	64183.8	4.80743	0.0265827	3	2	1.22127	0.288385	0.00120592
P31409;E1JIJ5	54	43	214.977	0.0615289	1.21092	0.0353695	1.03761	0.499524	Experimental_No_Manganese	Control_Manganese	54834.7	V-type proton ATPase subunit B OS=Drosophila melanogaster OX=7227 GN=Vha55 PE=2 SV=1	50835.7	48898.5	48825.2	49519.8	4.69478	0.0230252	3	5	51835.5	50836.5	51474.4	51382.1	4.71081	0.00984477	3	5	1.03761	0.0532617	0.060942
A8JNJ6;M9PBL6;Q7KV69;Q7KV70;Q9VZQ3	74	38	342.677	0.0121566	1.91519	0.0119778	1.04355	0.89436	Control_Manganese	Experimental_No_Manganese	498923	Karst_ isoform E OS=Drosophila melanogaster OX=7227 GN=kst PE=1 SV=2	48853.7	48122.7	48637.3	48537.9	4.68608	0.00773666	3	6	46092.8	47328.2	46116.5	46512.5	4.66757	0.0151902	3	7	0.958272	-0.061493	0.0118343
P08736	31	18	143.486	0.00169564	2.77067	0.00324908	1.03111	0.999586	Experimental_No_Manganese	Control_Manganese	50592.2	Elongation factor 1-alpha 1 OS=Drosophila melanogaster OX=7227 GN=eEF1alpha1 PE=1 SV=2	46163	45598.9	45750.6	45837.5	4.66122	0.00636852	3	7	47226.3	47138.2	47425.7	47263.4	4.67453	0.00311694	3	6	1.03111	0.0441957	0.0016463
P48610;A8JNP1;A8JNP2;P48610-2;P48610-3;P48610-4	58	44	265.656	0.000215448	3.66666	0.000920376	1.13213	1	Control_Manganese	Experimental_No_Manganese	40151.4	Arginine kinase OS=Drosophila melanogaster OX=7227 GN=Argk PE=2 SV=2	45848.9	44589	45032.9	45156.9	4.65472	0.014152	3	8	39802.6	40284.9	39572.7	39886.7	4.60083	0.00911289	3	11	0.883291	-0.179039	0.000241922
Q05825;L0MQ04;X2JH42;Q9VN42	99	74	317.429	0.256629	0.590695	0.102362	1.03718	0.176916	Control_Manganese	Experimental_No_Manganese	54108.1	ATP synthase subunit beta_ mitochondrial OS=Drosophila melanogaster OX=7227 GN=ATPsynbeta PE=1 SV=3	43608.6	40297.9	40502.7	41469.7	4.61773	0.0447343	3	9	40351	39237.6	40360.6	39983.1	4.60188	0.0161479	3	10	0.964151	-0.0526694	0.260082
P35381	80	62	250.74	0.421797	0.374897	0.146688	1.00962	0.107623	Control_Manganese	Experimental_No_Manganese	59649.8	ATP synthase subunit alpha_ mitochondrial OS=Drosophila melanogaster OX=7227 GN=blw PE=1 SV=2	41163.9	39700.3	40402	40422.1	4.60662	0.018109	3	10	40101.4	40110	39898.9	40036.8	4.60246	0.00298299	3	9	0.990467	-0.0138187	0.419071
B7Z0E0;Q7KUB1;Q9VSI6;Q7KUB0;Q8IQA7	98	85	344	0.00605573	2.21783	0.00756277	1.05556	0.971373	Control_Manganese	Experimental_No_Manganese	54099.7	Isocitrate dehydrogenase [NADP] OS=Drosophila melanogaster OX=7227 GN=Idh PE=1 SV=2	39991.6	39056.8	39560.9	39536.4	4.597	0.0118344	3	11	37744.7	36891.7	37729.9	37455.4	4.57351	0.0130365	3	13	0.947366	-0.078006	0.00596657
Q02645;A0A0B4K7A5;A0A0B4K849;Q02645-2;Q02645-4;Q02645-3	22	8	113.95	0.000961364	3.01711	0.00229141	1.12968	0.999981	Experimental_No_Manganese	Control_Manganese	128852	Protein hu-li tai shao OS=Drosophila melanogaster OX=7227 GN=hts PE=1 SV=2	38869.2	38605.5	39571.3	39015.4	4.59124	0.0127947	3	12	43155.9	44095.1	44973.2	44074.7	4.64419	0.0206204	3	8	1.12968	0.17591	0.00107397
P06603;P06605;P06604	45	41	175.482	0.000261043	3.58329	0.00105568	1.1022	1	Experimental_No_Manganese	Control_Manganese	50592.8	Tubulin alpha-1 chain OS=Drosophila melanogaster OX=7227 GN=alphaTub84B PE=1 SV=1	34077.5	34262.7	33679.6	34006.6	4.53156	0.00876184	3	13	37338.7	37936.4	37171.5	37482.2	4.57383	0.0107289	3	12	1.1022	0.140392	0.000273924
Q94920;M9PD75	50	34	229.914	0.00614554	2.21144	0.00764348	1.05948	0.970401	Control_Manganese	Experimental_No_Manganese	30550	Voltage-dependent anion-selective channel OS=Drosophila melanogaster OX=7227 GN=porin PE=1 SV=3	32124	31957.6	31687.2	31923	4.5041	0.00690605	3	14	30674.4	30107.5	29610.7	30130.9	4.47901	0.0176639	3	17	0.943862	-0.0833523	0.00573744
Q9VIQ8	17	15	36.5377	0.146421	0.834397	0.0667852	1.03498	0.28352	Control_Manganese	Experimental_No_Manganese	20690.7	Cytochrome c oxidase subunit 4_ isoform A OS=Drosophila melanogaster OX=7227 GN=COX4 PE=1 SV=1	32392	30865	30844.8	31367.3	4.49648	0.0282937	3	15	30890.8	29874.8	30155.6	30307	4.48154	0.0173115	3	16	0.966199	-0.049608	0.14947
P07487;M9PJN8	32	18	113.149	0.101263	0.994549	0.0508126	1.02837	0.368997	Control_Manganese	Experimental_No_Manganese	35540.6	Glyceraldehyde-3-phosphate dehydrogenase 2 OS=Drosophila melanogaster OX=7227 GN=Gapdh2 PE=1 SV=2	30640.6	29815.1	31064.4	30506.7	4.4844	0.0208265	3	16	29972.4	29483.8	29539.5	29665.2	4.47225	0.00901462	3	19	0.972417	-0.0403531	0.101993
P00334	33	27	131.839	0.00517202	2.28634	0.00665035	1.1526	0.980347	Control_Manganese	Experimental_No_Manganese	27875.2	Alcohol dehydrogenase OS=Drosophila melanogaster OX=7227 GN=Adh PE=1 SV=2	31699	29550.5	29830.1	30359.8	4.4823	0.0384759	3	17	26804.8	25675.8	26540.1	26340.2	4.42062	0.0224159	3	22	0.8676	-0.204898	0.00600849
Q27331;A4V0N4	115	83	456.221	0.397816	0.400318	0.141186	1.00991	0.11455	Experimental_No_Manganese	Control_Manganese	68587.1	V-type proton ATPase catalytic subunit A isoform 2 OS=Drosophila melanogaster OX=7227 GN=Vha68-2 PE=1 SV=2	30386.8	29423.7	30275.4	30028.6	4.47754	0.0175452	3	18	30286.4	30483	30209.2	30326.2	4.48182	0.004654	3	15	1.00991	0.0142259	0.398198
Q26365;Q26365-2;X2JB48;O62526	46	39	178.981	0.00255187	2.59314	0.00426286	1.07837	0.99774	Experimental_No_Manganese	Control_Manganese	34442.8	ADP_ATP carrier protein OS=Drosophila melanogaster OX=7227 GN=sesB PE=2 SV=4	28890	29393.2	29765.3	29349.5	4.4676	0.0149662	3	19	31612.4	31276.7	32059.6	31649.6	4.50037	0.0124104	3	14	1.07837	0.108851	0.00249637
Q23979;Q23979-2;Q23979-3	52	44	275.348	0.0088442	2.05334	0.0097983	1.03666	0.937859	Control_Manganese	Experimental_No_Manganese	119731	Unconventional myosin IC OS=Drosophila melanogaster OX=7227 GN=Myo61F PE=1 SV=3	27862.2	28251.5	28260.6	28124.8	4.44909	0.00808789	3	20	27031.7	27445.3	26913.8	27130.2	4.43345	0.0102879	3	21	0.964639	-0.0519394	0.0087495
Q9VU35	6	4	34.968	0.332936	0.477639	0.124182	1.01728	0.137654	Experimental_No_Manganese	Control_Manganese	11016	RH34413p OS=Drosophila melanogaster OX=7227 GN=Dmel\CG11267 PE=1 SV=1	28436.4	27372	27370	27726.1	4.44289	0.0221847	3	21	27700.8	28527.8	28387.4	28205.3	4.45033	0.0156905	3	20	1.01728	0.0247202	0.334918
P10987;X2JCP8;P02572	39	20	236.17	0.00156512	2.80545	0.00308387	1.14019	0.999717	Experimental_No_Manganese	Control_Manganese	42221.1	Actin-5C OS=Drosophila melanogaster OX=7227 GN=Act5C PE=1 SV=4	25341.6	26523	26522.1	26128.9	4.41712	0.0260954	3	22	29331.5	29920.2	30123.6	29791.8	4.4741	0.0138081	3	18	1.14019	0.189268	0.00134489
P15357;A4V1F9;P0CG69;P18101;Q7JYK1;Q9W418;R9PY16	14	10	57.3826	0.96786	0.0141876	0.265495	1.00174	0.0501305	Experimental_No_Manganese	Control_Manganese	18168.1	Ubiquitin-40S ribosomal protein S27a OS=Drosophila melanogaster OX=7227 GN=RpS27A PE=1 SV=2	24063	22709.2	23464.5	23412.2	4.36944	0.0289776	3	23	24411.4	22317	23630.5	23452.9	4.3702	0.0451296	3	24	1.00174	0.00250751	0.957944
Q9VPD5	3	1	13.6462	6.8879e-06	5.16191	0.000188771	1.94242	1	Control_Manganese	Experimental_No_Manganese	41438.3	Transcription termination factor 3_ mitochondrial OS=Drosophila melanogaster OX=7227 GN=mTerf3 PE=2 SV=1	23845.2	23033.1	22710.6	23196.3	4.36542	0.0252047	3	24	12319.5	11839.6	11666.9	11942	4.07708	0.0283144	3	64	0.514823	-0.957853	8.57805e-06
P11147;C7LA75	63	44	309.341	0.0174013	1.75942	0.0151157	1.03642	0.827714	Experimental_No_Manganese	Control_Manganese	71416.6	Heat shock 70 kDa protein cognate 4 OS=Drosophila melanogaster OX=7227 GN=Hsc70-4 PE=1 SV=3	23204.6	22697.6	22710.1	22870.8	4.35928	0.0126456	3	25	23897.4	23452.7	23761	23703.7	4.37482	0.00961207	3	23	1.03642	0.0516078	0.0172706
Q9VLM8	16	11	90.3009	0.378318	0.422143	0.136423	1.02074	0.120762	Experimental_No_Manganese	Control_Manganese	108369	Alanine--tRNA ligase_ cytoplasmic OS=Drosophila melanogaster OX=7227 GN=AlaRS PE=2 SV=1	23106.4	21536	22564.3	22402.2	4.35029	0.0356063	3	26	22788.2	22741.9	23070.8	22867	4.35921	0.0077849	3	26	1.02074	0.0296224	0.380435
Q9VIE8;Q8T4D6	64	51	305.061	0.69472	0.15819	0.208413	1.00682	0.0626998	Control_Manganese	Experimental_No_Manganese	86254	Aconitate hydratase_ mitochondrial OS=Drosophila melanogaster OX=7227 GN=mAcon1 PE=1 SV=2	21977.8	21220.8	22033.1	21743.9	4.33734	0.0208717	3	27	21200.3	21607.8	21982	21596.7	4.33439	0.0181028	3	27	0.99323	-0.00980072	0.692253
P54611;A0A0B4LGS4	50	42	204.285	0.712265	0.147358	0.211887	1.01153	0.0611826	Control_Manganese	Experimental_No_Manganese	26196.2	V-type proton ATPase subunit E OS=Drosophila melanogaster OX=7227 GN=Vha26 PE=2 SV=1	22223.6	21086.3	20441.9	21250.6	4.32737	0.0424529	3	28	21439.5	20472.8	21112.6	21008.3	4.32239	0.0234061	3	28	0.988599	-0.0165429	0.703876
Q9VEB1	43	35	171.695	0.666066	0.176483	0.2023	1.0121	0.0654377	Control_Manganese	Experimental_No_Manganese	35546.1	IP09655p OS=Drosophila melanogaster OX=7227 GN=Mdh2 PE=1 SV=1	21630.7	20247.9	21644.7	21174.4	4.32581	0.0378952	3	29	21420.6	20703.2	20640	20921.3	4.32059	0.0207267	3	29	0.988043	-0.017354	0.655781
Q0KI05	46	20	220.135	0.817779	0.0873641	0.233673	1.00675	0.0543048	Control_Manganese	Experimental_No_Manganese	558318	Uncharacterized protein OS=Drosophila melanogaster OX=7227 GN=DHC5 PE=4 SV=2	21138	20093.8	21691	20974.3	4.32169	0.0386711	3	30	20540	20577.9	21383	20833.6	4.31877	0.022853	3	30	0.993294	-0.00970769	0.80839
Q9VBR6	74	56	262.078	0.100525	0.997727	0.0506372	1.13318	0.370803	Experimental_No_Manganese	Control_Manganese	74940.3	RE74917p OS=Drosophila melanogaster OX=7227 GN=tobi PE=2 SV=1	22551.3	18363	20707.8	20540.7	4.31261	0.102196	3	31	23733	23066.6	23029.4	23276.4	4.36692	0.0170097	3	25	1.13318	0.180382	0.0907999
P13706;B5RIM9;M9PC43;M9PET0;P13706-2;P13706-3;P13706-4	39	31	171.811	0.0530936	1.27496	0.0320286	1.048	0.540201	Control_Manganese	Experimental_No_Manganese	40311.5	Glycerol-3-phosphate dehydrogenase [NAD(+)]_ cytoplasmic OS=Drosophila melanogaster OX=7227 GN=Gpdh PE=1 SV=3	21014.9	19851.7	20161.4	20342.7	4.30841	0.0296143	3	32	19368.8	19497.7	19366	19410.9	4.28804	0.00387597	3	32	0.954195	-0.0676442	0.0564871
Q8IN25	36	29	162.508	0.252109	0.598411	0.100971	1.03323	0.179833	Experimental_No_Manganese	Control_Manganese	107076	Aminopeptidase OS=Drosophila melanogaster OX=7227 GN=anon-WO0140519.24 PE=1 SV=1	20843.3	19617.2	19575.4	20011.9	4.30129	0.0359913	3	33	21190.8	20614.8	20225.2	20677	4.31549	0.0234937	3	31	1.03323	0.0471633	0.255535
Q8SWX4	32	28	151.696	0.270375	0.568033	0.106112	1.03149	0.168525	Control_Manganese	Experimental_No_Manganese	108760	Aminopeptidase OS=Drosophila melanogaster OX=7227 GN=CG5839 PE=1 SV=1	19790.8	18719.4	18957.3	19155.8	4.2823	0.0293709	3	36	18906.2	18879	17927.8	18571	4.26884	0.0300045	3	35	0.96947	-0.0447315	0.269992
P08879;A0A0B4LHX6;A0A0B4LJ12	22	19	79.7205	0.00143079	2.84442	0.00291294	1.06858	0.999818	Control_Manganese	Experimental_No_Manganese	17226.9	Nucleoside diphosphate kinase OS=Drosophila melanogaster OX=7227 GN=awd PE=1 SV=3	17345	17449.7	17686	17493.6	4.24288	0.00998341	3	37	16566	16223	16323.5	16370.8	4.21407	0.010771	3	38	0.935821	-0.0956958	0.00143264
Q9VNW6	57	46	248.069	0.000599729	3.22204	0.00182717	1.14736	0.999999	Experimental_No_Manganese	Control_Manganese	84662.7	Delta-1-pyrroline-5-carboxylate synthase OS=Drosophila melanogaster OX=7227 GN=Dmel\CG7470 PE=1 SV=1	16987.1	16886.8	16667.6	16847.2	4.22653	0.0096991	3	38	19261.9	18938.5	19788.9	19329.8	4.28623	0.0222055	3	33	1.14736	0.198319	0.000724846
Q9W401;Q9W401-2	37	32	185.005	0.000159873	3.79622	0.000852877	1.14101	1	Control_Manganese	Experimental_No_Manganese	51745.6	Probable citrate synthase_ mitochondrial OS=Drosophila melanogaster OX=7227 GN=kdn PE=2 SV=1	16924.9	16654.7	16664.6	16748.1	4.22396	0.00914702	3	39	14878.1	14684.2	14472.6	14678.3	4.16668	0.0138188	3	42	0.876416	-0.190312	0.00014669
Q7KT11;Q8SZU0;Q9VIJ0	25	17	136.767	0.0641436	1.19285	0.036661	1.07115	0.488152	Control_Manganese	Experimental_No_Manganese	35770	Uncharacterized protein_ isoform B OS=Drosophila melanogaster OX=7227 GN=Dmel\CG9331 PE=1 SV=1	17358.1	16235	15899.5	16497.5	4.21742	0.046303	3	40	15520.6	15391.9	15292.4	15401.6	4.18757	0.00742955	3	41	0.933573	-0.0991649	0.0698863
Q9VBS7	8	2	38.9677	2.12791e-05	4.67205	0.000308069	1.43759	1	Control_Manganese	Experimental_No_Manganese	49304.8	Uncharacterized protein_ isoform B OS=Drosophila melanogaster OX=7227 GN=Dmel\CG10550 PE=1 SV=1	16720	16322.5	15918.8	16320.4	4.21273	0.0245469	3	41	11296.4	11509.2	11252.3	11352.6	4.0551	0.0120973	3	68	0.695608	-0.523653	3.46491e-05
A1ZB70	8	7	42.4032	0.00115237	2.93841	0.00258881	1.10314	0.999943	Control_Manganese	Experimental_No_Manganese	25310	Glutathione S transferase E5 OS=Drosophila melanogaster OX=7227 GN=GstE5 PE=1 SV=1	14953.4	15559.4	15351.1	15288	4.18435	0.0201389	3	42	13910.2	13824.8	13840.6	13858.5	4.14172	0.00327919	3	49	0.906499	-0.141622	0.00135237
P45594	24	20	77.8219	0.0459373	1.33783	0.0293888	1.03148	0.580452	Experimental_No_Manganese	Control_Manganese	17438.7	Cofilin/actin-depolymerizing factor homolog OS=Drosophila melanogaster OX=7227 GN=tsr PE=1 SV=1	15223.8	15381.7	15247.5	15284.3	4.18425	0.00556928	3	43	16083.9	15669.1	15543.5	15765.5	4.19771	0.017938	3	39	1.03148	0.0447141	0.0477456
Q7JR58	31	28	103.84	0.00274308	2.56176	0.00446346	1.13199	0.997063	Control_Manganese	Experimental_No_Manganese	31981.5	LD24265p OS=Drosophila melanogaster OX=7227 GN=Echs1 PE=1 SV=1	15026.4	15582.4	15226.5	15278.4	4.18408	0.0184312	3	44	13204.3	13906.6	13379.8	13496.9	4.13023	0.0270828	3	52	0.883397	-0.178866	0.0026004
Q9VD61	5	1	18.6793	0.48014	0.318632	0.161657	1.02672	0.0934821	Experimental_No_Manganese	Control_Manganese	63403	Sulfhydryl oxidase OS=Drosophila melanogaster OX=7227 GN=Qsox2 PE=2 SV=1	15300.5	15841.2	14383.4	15175	4.18113	0.048564	3	45	15990.6	15765.1	14985.7	15580.5	4.19258	0.0338411	3	40	1.02672	0.0380399	0.481613
P29310;A0A0B4KEH0;P29310-3	36	23	132.169	0.00718498	2.14357	0.00845952	1.06347	0.958514	Control_Manganese	Experimental_No_Manganese	28341.7	14-3-3 protein zeta OS=Drosophila melanogaster OX=7227 GN=14-3-3zeta PE=1 SV=1	14969.7	15184	14789	14980.9	4.17554	0.013198	3	46	13989.2	14352.3	13918.9	14086.8	4.14881	0.0165119	3	48	0.940315	-0.0887846	0.00711513
Q9VN21	12	6	64.9019	0.127927	0.893037	0.060791	1.03804	0.313498	Control_Manganese	Experimental_No_Manganese	59970.6	LD30155p OS=Drosophila melanogaster OX=7227 GN=lost PE=1 SV=1	15239.1	14554.4	14459.3	14751	4.16882	0.0288373	3	47	14487	13996.9	14147.3	14210.4	4.15261	0.0176666	3	46	0.963353	-0.0538632	0.130902
M9PCG1;Q9VM14;M9PCA2;M9PCU4;Q7KTK9	23	13	106.472	0.013565	1.86758	0.0129962	1.07018	0.875926	Control_Manganese	Experimental_No_Manganese	53028	Dihydrolipoamide acetyltransferase component of pyruvate dehydrogenase complex OS=Drosophila melanogaster OX=7227 GN=muc PE=1 SV=1	14185.9	14685.7	14968.4	14613.3	4.16475	0.0271167	3	48	13730.8	13577.6	13656.8	13655.1	4.13529	0.00560874	3	50	0.934426	-0.0978477	0.0147038
Q9VXJ0;X2JFD6	26	19	121.281	6.39354e-05	4.19426	0.000490084	1.31212	1	Control_Manganese	Experimental_No_Manganese	64358.4	Peroxisomal multifunctional enzyme type 2 OS=Drosophila melanogaster OX=7227 GN=Mfe2 PE=1 SV=1	14372.1	14324.4	14066	14254.2	4.15394	0.0115564	3	49	11015.9	10559.1	11015.3	10863.4	4.03597	0.0242597	3	77	0.762124	-0.391903	4.61888e-05
Q9VC52	9	4	40.7214	0.00581149	2.23571	0.00730441	1.05683	0.973965	Control_Manganese	Experimental_No_Manganese	53658.4	Protoporphyrinogen oxidase OS=Drosophila melanogaster OX=7227 GN=Ppox PE=1 SV=1	13523	13907.8	13976.4	13802.4	4.13995	0.0177077	3	50	13064.1	13062.5	13054	13060.2	4.11595	0.000419205	3	56	0.946228	-0.0797404	0.00626171
P07764;A4V3G1;C8VV14;F3YDE2;P07764-2;P07764-3	51	39	199.704	0.00319343	2.49574	0.00483834	1.06148	0.995065	Experimental_No_Manganese	Control_Manganese	39275.6	Fructose-bisphosphate aldolase OS=Drosophila melanogaster OX=7227 GN=Ald PE=1 SV=5	13684.3	13337.9	13386.5	13469.6	4.12935	0.0139254	3	51	14395.4	14338.7	14159.2	14297.8	4.15527	0.00862374	3	44	1.06148	0.0860833	0.003078
Q9VM12	21	16	83.2782	0.191108	0.718722	0.0817316	1.02492	0.229219	Control_Manganese	Experimental_No_Manganese	34163.8	MIP26555p1 OS=Drosophila melanogaster OX=7227 GN=Dmel\CG5958 PE=1 SV=1	12882.6	13039.8	13326.2	13082.8	4.1167	0.0171948	3	52	12538.8	12691.7	13063.9	12764.8	4.10601	0.0211577	3	57	0.975689	-0.0355062	0.192119
P53501	31	11	232.117	0.0028596	2.5437	0.00451572	1.1127	0.9966	Control_Manganese	Experimental_No_Manganese	42234.2	Actin-57B OS=Drosophila melanogaster OX=7227 GN=Act57B PE=1 SV=1	12485.1	12686.3	12967.4	12712.9	4.10425	0.0190544	3	53	11243.8	11332.2	11699.8	11425.3	4.05787	0.0211683	3	67	0.898711	-0.15407	0.00286439
P82147;A0A0B4KEY5	4	3	23.7162	0.000427607	3.36895	0.00153167	1.13796	1	Experimental_No_Manganese	Control_Manganese	21309	Protein lethal(2)essential for life OS=Drosophila melanogaster OX=7227 GN=l(2)efl PE=1 SV=1	12486.2	12425.5	12768.6	12560.1	4.09899	0.0145781	3	54	14324.4	14065.3	14489.1	14292.9	4.15512	0.0149489	3	45	1.13796	0.186454	0.000437594
P02828;M9PBL3	62	44	292.797	0.929551	0.0317267	0.258432	1.00267	0.0506291	Experimental_No_Manganese	Control_Manganese	82150.7	Heat shock protein 83 OS=Drosophila melanogaster OX=7227 GN=Hsp83 PE=1 SV=1	12901.7	12125.9	11930.4	12319.3	4.09059	0.0416973	3	55	12093	12138	12825.5	12352.2	4.09174	0.0332367	3	60	1.00267	0.0038398	0.935242
A0A0B4KI27;B8A405;H1UUD2;Q7KRU8;Q8I0T0	14	12	74.9474	0.000685943	3.16371	0.0019664	1.09734	0.999998	Control_Manganese	Experimental_No_Manganese	28124	Ferritin OS=Drosophila melanogaster OX=7227 GN=Fer1HCH PE=1 SV=1	12107.5	12226.1	12312.5	12215.4	4.08691	0.00842909	3	56	11174.9	11269	10951.3	11131.8	4.04656	0.0146611	3	73	0.911291	-0.134016	0.000625697
Q9VLC5	37	28	206.223	0.706896	0.150645	0.211093	1.00744	0.0616345	Experimental_No_Manganese	Control_Manganese	57361.3	Aldehyde dehydrogenase OS=Drosophila melanogaster OX=7227 GN=Aldh PE=1 SV=1	12139.6	12208	12182.9	12176.8	4.08553	0.00284338	3	57	12696.4	12002.7	12103	12267.4	4.08875	0.0305592	3	61	1.00744	0.0106879	0.698378
Q9VVU1	30	28	123.559	0.00498853	2.30203	0.00649402	1.25146	0.982056	Control_Manganese	Experimental_No_Manganese	45594.4	FI09602p OS=Drosophila melanogaster OX=7227 GN=CT12987 PE=1 SV=1	11451.2	12984	11807.6	12080.9	4.0821	0.0663971	3	59	9831.69	9425.49	9703.22	9653.47	3.98468	0.0215069	3	106	0.799066	-0.323614	0.00710848
Q9V4I1	70	57	316.775	0.000842378	3.07449	0.00214389	1.16836	0.999992	Control_Manganese	Experimental_No_Manganese	59367.5	Cytochrome P450 9b2 OS=Drosophila melanogaster OX=7227 GN=Cyp9b2 PE=2 SV=1	11654.8	12126.3	12325.9	12035.7	4.08047	0.0286341	3	60	10344.9	10206.6	10352.7	10301.4	4.0129	0.00797722	3	87	0.855903	-0.224481	0.00106075
Q8IQQ0;A8JNU6;Q9VVC5	24	13	133.472	0.00694464	2.15835	0.00827626	1.21286	0.961355	Experimental_No_Manganese	Control_Manganese	114537	Neural conserved at 73EF_ isoform F OS=Drosophila melanogaster OX=7227 GN=Nc73EF PE=1 SV=1	11348	12598.6	11814.8	11920.5	4.07629	0.053015	3	61	14007	15096.5	14270.2	14457.9	4.1601	0.0393194	3	43	1.21286	0.278414	0.00665047
Q7KMI3	2	1	8.8426	0.00539881	2.2677	0.00686117	1.19686	0.978156	Control_Manganese	Experimental_No_Manganese	114568	BcDNA.LD23371 OS=Drosophila melanogaster OX=7227 GN=BcDNA.LD23371 PE=2 SV=1	11546.8	12021.9	12032.7	11867.1	4.07435	0.0233836	3	62	9805.98	9460	10479.7	9915.23	3.9963	0.0522994	3	97	0.835521	-0.259253	0.00454039
P92177;P92177-1;P92177-2;P92177-4	28	18	168.018	0.000889632	3.05079	0.00218711	1.17182	0.999988	Control_Manganese	Experimental_No_Manganese	29969.7	14-3-3 protein epsilon OS=Drosophila melanogaster OX=7227 GN=14-3-3epsilon PE=1 SV=2	11816.8	11672.4	12079.7	11856.3	4.07395	0.0174139	3	63	10363.2	9847.52	10142.9	10117.9	4.00509	0.0255722	3	92	0.853375	-0.228748	0.000809983
Q9W0S7	44	36	188.18	0.133129	0.875728	0.0623971	1.05254	0.304484	Experimental_No_Manganese	Control_Manganese	103499	Staphylococcal nuclease domain-containing protein 1 OS=Drosophila melanogaster OX=7227 GN=Tudor-SN PE=1 SV=1	12356.6	11334.7	11553.7	11748.3	4.06998	0.045794	3	64	12376.1	12544.2	12176.4	12365.6	4.09221	0.0148886	3	59	1.05254	0.0738735	0.133262
P17336	36	29	210.598	7.30024e-05	4.13666	0.000490084	1.27829	1	Control_Manganese	Experimental_No_Manganese	57662.9	Catalase OS=Drosophila melanogaster OX=7227 GN=Cat PE=1 SV=2	11881.7	11775.1	11530.2	11729	4.06926	0.0153673	3	65	9386.6	9096.57	9043.49	9175.55	3.96263	0.0201284	3	115	0.782297	-0.354211	6.80042e-05
Q7KV27;Q9VYD9;Q9VFV8	37	29	216.593	0.0998821	1.00051	0.0504435	1.04282	0.372389	Control_Manganese	Experimental_No_Manganese	63584.8	Uncharacterized protein_ isoform A OS=Drosophila melanogaster OX=7227 GN=ALT PE=1 SV=1	11255.1	11961.9	11882.1	11699.7	4.06817	0.0330846	3	66	11238.1	11157.4	11262.4	11219.3	4.04996	0.00489784	3	72	0.958937	-0.0604917	0.10039
Q9VH09	3	1	13.0801	4.86484e-05	4.31293	0.00044224	1.1721	1	Control_Manganese	Experimental_No_Manganese	110626	Glycine cleavage system P protein OS=Drosophila melanogaster OX=7227 GN=Dmel\CG3999 PE=1 SV=1	11520.5	11494.2	11781.6	11598.8	4.06441	0.0137	3	67	9832.2	9930.77	9924.02	9895.67	3.99545	0.00556455	3	98	0.853166	-0.229101	6.20353e-05
Q7K142;Q8SYL7	4	2	24.0002	0.00197951	2.70344	0.00357788	1.27907	0.999177	Control_Manganese	Experimental_No_Manganese	50194.3	UDP-glucuronosyltransferase OS=Drosophila melanogaster OX=7227 GN=Ugt50B3 PE=2 SV=1	11962.6	11602.6	11000.7	11521.9	4.06153	0.0421795	3	68	8637.33	9004.16	9382.6	9008.03	3.95463	0.0413689	3	118	0.781816	-0.3551	0.00206773
Q24560;A1ZBL0	36	15	187.697	0.865869	0.0625477	0.244028	1.0045	0.0523042	Control_Manganese	Experimental_No_Manganese	50603.7	Tubulin beta-1 chain OS=Drosophila melanogaster OX=7227 GN=betaTub56D PE=1 SV=2	11793.1	11274.1	10998.8	11355.3	4.0552	0.035521	3	69	11518.7	11317.2	11077.4	11304.5	4.05325	0.0195415	3	69	0.995519	-0.00647855	0.857374
P32100;X2J5G6	21	15	76.9537	0.0311036	1.50719	0.0225989	1.10974	0.687301	Experimental_No_Manganese	Control_Manganese	29609.1	60S ribosomal protein L7 OS=Drosophila melanogaster OX=7227 GN=RpL7 PE=1 SV=2	11998	11299.1	10764.3	11353.8	4.05514	0.0544928	3	70	12417.7	12718.7	12663	12599.8	4.10036	0.0127123	3	58	1.10974	0.150228	0.0278653
A1Z7H2;A0A0B4KFE4;A1Z7H3;Q8T3L1	25	16	122.784	0.00083247	3.07963	0.00214389	1.10278	0.999993	Control_Manganese	Experimental_No_Manganese	81644.1	Acyl-CoA synthetase long-chain_ isoform D OS=Drosophila melanogaster OX=7227 GN=Acsl PE=1 SV=1	11176.1	11382.7	11471.8	11343.5	4.05475	0.0133756	3	71	10436.8	10247.6	10174.6	10286.3	4.01226	0.0131554	3	88	0.9068	-0.141144	0.000841335
P05303;A4V3Q6	34	20	84.1977	0.382223	0.417683	0.136841	1.02395	0.119473	Experimental_No_Manganese	Control_Manganese	51061.8	Elongation factor 1-alpha 2 OS=Drosophila melanogaster OX=7227 GN=eEF1alpha2 PE=2 SV=2	10873.1	11580.4	11503.9	11319.1	4.05381	0.0342927	3	72	11277.9	11806.9	11686.1	11590.3	4.06409	0.0239177	3	66	1.02395	0.0341508	0.380581
P61851;M9PF91	10	10	22.688	0.00753167	2.12311	0.0087883	1.07389	0.954336	Control_Manganese	Experimental_No_Manganese	15983.7	Superoxide dismutase [Cu-Zn] OS=Drosophila melanogaster OX=7227 GN=Sod1 PE=1 SV=2	11507.1	11189.9	11136.7	11277.9	4.05223	0.0177602	3	73	10712.1	10409.7	10383.9	10501.9	4.02127	0.0173806	3	82	0.931191	-0.102851	0.00770621
P00408	13	9	50.6853	0.164267	0.784449	0.0730211	1.01047	0.259269	Control_Manganese	Experimental_No_Manganese	26304.7	Cytochrome c oxidase subunit 2 OS=Drosophila melanogaster OX=7227 GN=mt:CoII PE=3 SV=1	11258.3	11176.5	11261.8	11232.2	4.05047	0.00429539	3	74	11019.4	11232.9	11095.4	11115.9	4.04594	0.00973389	3	74	0.989643	-0.0150196	0.164209
Q95SI7	29	26	122.165	0.723581	0.140513	0.214275	1.01236	0.0602649	Control_Manganese	Experimental_No_Manganese	32521.4	GH23390p OS=Drosophila melanogaster OX=7227 GN=Dmel\CG6028 PE=1 SV=1	11810	11017	10764.5	11197.2	4.04911	0.0487174	3	75	11229.5	11176.4	10775.6	11060.5	4.04377	0.0224353	3	75	0.987794	-0.0177179	0.712994
A1Z7F1	38	32	200.415	2.98412e-05	4.52518	0.000388824	1.1929	1	Experimental_No_Manganese	Control_Manganese	68142.3	Maltase A6_ isoform C OS=Drosophila melanogaster OX=7227 GN=Mal-A6 PE=1 SV=2	11142.4	11044.8	11180.1	11122.4	4.0462	0.00627455	3	76	13409.9	13318.2	13075.8	13268	4.12281	0.0130096	3	55	1.1929	0.254478	3.71786e-05
Q94514;A0A0B4KFT0	17	13	87.0149	0.153547	0.81376	0.0692277	1.02503	0.273354	Control_Manganese	Experimental_No_Manganese	16793.2	Cytochrome c oxidase subunit 5A_ mitochondrial OS=Drosophila melanogaster OX=7227 GN=COX5A PE=2 SV=2	11294	11125.3	10944.2	11121.2	4.04615	0.0157305	3	77	10848.9	10647.9	11052.1	10849.6	4.03542	0.0186259	3	79	0.975584	-0.0356621	0.153292
Q9V3P0;X2JF59	22	13	66.0358	0.0515574	1.28771	0.0314406	1.02244	0.548351	Experimental_No_Manganese	Control_Manganese	21966.1	Peroxiredoxin 1 OS=Drosophila melanogaster OX=7227 GN=Jafrac1 PE=1 SV=1	11123.9	10930.7	11077.8	11044.2	4.04313	0.00913572	3	78	11397.3	11316.4	11162.4	11292	4.05277	0.0105648	3	71	1.02244	0.0320232	0.0514828
Q8IN10	1	1	4.5187	0.0692541	1.15955	0.0385626	1.11242	0.467377	Control_Manganese	Experimental_No_Manganese	70497	Ionotropic receptor 94a OS=Drosophila melanogaster OX=7227 GN=Ir94a PE=4 SV=1	11585.3	10950.1	10100.1	10878.5	4.03657	0.0684986	3	79	9705.97	9562.45	10068.9	9779.1	3.9903	0.0266919	3	103	0.898938	-0.153707	0.0734142
Q9VBG7	11	8	37.5836	0.000743769	3.12856	0.00203311	1.11074	0.999997	Control_Manganese	Experimental_No_Manganese	16334.2	Uncharacterized protein_ isoform A OS=Drosophila melanogaster OX=7227 GN=CG14558 PE=1 SV=2	11056.3	10653.8	10870.4	10860.2	4.03584	0.0185484	3	81	9751.72	9845.75	9734.88	9777.45	3.99023	0.00611068	3	104	0.900302	-0.151519	0.000871227
Q24439	38	32	154.281	0.000880458	3.05529	0.00218711	1.1551	0.999989	Control_Manganese	Experimental_No_Manganese	22479.3	ATP synthase subunit O_ mitochondrial OS=Drosophila melanogaster OX=7227 GN=ATPsynO PE=2 SV=2	10900.3	10590.5	10517.7	10669.5	4.02814	0.0190419	3	83	9406.35	9273.57	9030.56	9236.83	3.96552	0.0206314	3	112	0.865722	-0.208024	0.000877678
P29843;Q8I0E9	13	5	101.787	0.000166987	3.77732	0.000870321	1.26383	1	Experimental_No_Manganese	Control_Manganese	70914.6	Heat shock 70 kDa protein cognate 1 OS=Drosophila melanogaster OX=7227 GN=Hsc70-1 PE=1 SV=1	10811.7	10696.9	10488.7	10665.8	4.02799	0.0153514	3	84	13878	13285.8	13275.5	13479.8	4.12968	0.0255896	3	53	1.26383	0.337806	0.000217039
P42281	11	10	46.625	4.10759e-05	4.38641	0.0004117	1.13959	1	Control_Manganese	Experimental_No_Manganese	9556.82	Acyl-CoA-binding protein homolog OS=Drosophila melanogaster OX=7227 GN=Acbp2 PE=2 SV=1	10487.6	10705.5	10689.5	10627.5	4.02643	0.011428	3	85	9310.08	9345.15	9322.04	9325.76	3.96968	0.00191123	3	111	0.877511	-0.18851	5.16869e-05
O01666	22	20	93.2575	0.450294	0.346503	0.154131	1.01507	0.10028	Experimental_No_Manganese	Control_Manganese	33099.4	ATP synthase subunit gamma_ mitochondrial OS=Drosophila melanogaster OX=7227 GN=ATPsyngamma PE=2 SV=2	10893	10308.4	10590.6	10597.3	4.0252	0.0275886	3	86	10575.8	10816.7	10878.6	10757	4.03169	0.0148752	3	81	1.01507	0.0215756	0.453301
Q9VAF5	9	5	41.8756	0.0007001	3.15484	0.00198307	1.29506	0.999998	Experimental_No_Manganese	Control_Manganese	187331	Cadherin-99C OS=Drosophila melanogaster OX=7227 GN=Cad99C PE=1 SV=2	10062.2	10833	10606.9	10500.7	4.02122	0.0377342	3	87	13252.5	13527.6	14017	13599	4.13351	0.0284778	3	51	1.29506	0.373021	0.000635855
Q9V7N5;B7YZI0;Q9V7N5-2;Q9V7N5-3	42	29	205.315	0.0031359	2.50364	0.00476966	1.12809	0.995351	Experimental_No_Manganese	Control_Manganese	93473.9	V-type proton ATPase subunit C OS=Drosophila melanogaster OX=7227 GN=Vha44 PE=2 SV=5	10386.5	10248.3	10811.3	10482	4.02044	0.027991	3	88	11650.7	11768.9	12054.6	11824.7	4.07279	0.0175613	3	65	1.12809	0.173887	0.00294037
P15007;E1JHR5;P15007-2	41	34	170.527	0.214914	0.667735	0.088992	1.02574	0.207395	Control_Manganese	Experimental_No_Manganese	54595.3	Enolase OS=Drosophila melanogaster OX=7227 GN=Eno PE=1 SV=2	10081.3	10547.3	10631.3	10420	4.01787	0.0284314	3	89	10072.5	10189.2	10213.6	10158.5	4.00683	0.00742469	3	90	0.974904	-0.0366686	0.212566
Q8SXR5	4	3	12.9159	0.747841	0.126191	0.219465	1.00743	0.0584511	Experimental_No_Manganese	Control_Manganese	52923	RE54151p OS=Drosophila melanogaster OX=7227 GN=Dmel\CG8366 PE=2 SV=1	10258	10504.9	10429.5	10397.5	4.01693	0.0121686	3	90	10259.1	10282.4	10882.6	10474.7	4.02014	0.0337423	3	84	1.00743	0.0106789	0.739538
Q9VV75	43	37	182.092	0.820239	0.0860595	0.234205	1.00287	0.0541863	Control_Manganese	Experimental_No_Manganese	45586.5	AT02348p OS=Drosophila melanogaster OX=7227 GN=UQCR-C2 PE=1 SV=1	10317.1	10398.5	10336.8	10350.8	4.01497	0.00410518	3	91	10087.5	10359.5	10516.5	10321.1	4.01373	0.0210298	3	86	0.997137	-0.00413633	0.827872
Q9VCR0	10	6	48.6391	4.41169e-05	4.35539	0.000421902	1.3812	1	Control_Manganese	Experimental_No_Manganese	45146.4	Uncharacterized protein_ isoform A OS=Drosophila melanogaster OX=7227 GN=Dmel\CG17109 PE=1 SV=1	10018.6	10485.8	10304.7	10269.7	4.01156	0.0229344	3	92	7444.67	7296.66	7564.8	7435.38	3.8713	0.0180636	3	148	0.724011	-0.465917	5.47088e-05
Q9V4U9	3	1	21.9985	0.196649	0.706308	0.0834624	1.06599	0.223785	Control_Manganese	Experimental_No_Manganese	58043	Probable cytochrome P450 6a13 OS=Drosophila melanogaster OX=7227 GN=Cyp6a13 PE=2 SV=1	10805.2	9771.47	9681.4	10086	4.00372	0.0619131	3	93	9158.81	9397.63	9828.44	9461.63	3.97597	0.0358684	3	109	0.938093	-0.0921979	0.202738
Q9VYH3;X2JER0	7	6	43.3333	0.670337	0.173707	0.203124	1.0199	0.0650083	Experimental_No_Manganese	Control_Manganese	26598.3	Probable alpha-aspartyl dipeptidase OS=Drosophila melanogaster OX=7227 GN=CG2200 PE=2 SV=1	9764.65	9432.08	10683.4	9960.04	3.99826	0.0650733	3	94	10537.1	10251.8	9685.65	10158.2	4.00682	0.0426645	3	91	1.0199	0.0284208	0.682534
Q9W196	6	3	38.4042	0.667165	0.175767	0.20232	1.00699	0.0653265	Control_Manganese	Experimental_No_Manganese	129913	LP03102p OS=Drosophila melanogaster OX=7227 GN=Dmel\CG3356 PE=1 SV=1	9728.13	9793.31	10168.1	9896.51	3.99548	0.0239928	3	95	9801.78	9757.46	9924.29	9827.84	3.99246	0.00879259	3	100	0.993061	-0.0100452	0.662375
A1Z7F2	47	36	213.277	0.00125055	2.9029	0.00264716	1.21867	0.999911	Experimental_No_Manganese	Control_Manganese	67429.2	Maltase A7_ isoform A OS=Drosophila melanogaster OX=7227 GN=Mal-A7 PE=4 SV=1	10209.7	9443.3	9905.15	9852.72	3.99356	0.0391657	3	96	12176.4	12036.2	11809.1	12007.2	4.07944	0.0154381	3	62	1.21867	0.285308	0.000953985
A1ZB68	35	30	131.736	0.0684126	1.16486	0.0383123	1.06651	0.470674	Control_Manganese	Experimental_No_Manganese	24947.8	FI01423p OS=Drosophila melanogaster OX=7227 GN=GstE3 PE=1 SV=1	10181.6	9648.31	9687.19	9839.05	3.99295	0.0302193	3	97	9572.01	8965.03	9139.34	9225.46	3.96499	0.0338759	3	113	0.937638	-0.0928977	0.0694122
A1Z8Z9	31	24	135.916	0.0108841	1.96321	0.0112256	1.10662	0.911163	Control_Manganese	Experimental_No_Manganese	59587	Uncharacterized protein OS=Drosophila melanogaster OX=7227 GN=mdcds_23070 PE=1 SV=1	9452.26	9904.84	10007.3	9788.13	3.9907	0.0301748	3	98	8808.88	8648.56	9077.66	8845.03	3.9467	0.0245133	3	122	0.903649	-0.146166	0.011175
P19889;M9PG76	29	25	101.458	0.00657893	2.18184	0.00797139	1.1181	0.965577	Control_Manganese	Experimental_No_Manganese	34316.5	60S acidic ribosomal protein P0 OS=Drosophila melanogaster OX=7227 GN=RpLP0 PE=1 SV=1	10029.6	9721.3	9473.5	9741.46	3.98862	0.0285979	3	99	8953.75	8573.1	8610.61	8712.49	3.94014	0.0240785	3	125	0.894372	-0.161053	0.00693182
A0A0B4LGY4;A0A0B4LFU6;A1ZBG9;A1ZBH0;Q7K173	4	1	20.4427	0.0160387	1.79483	0.014408	1.05308	0.844432	Control_Manganese	Experimental_No_Manganese	74693.4	Beta-glucuronidase OS=Drosophila melanogaster OX=7227 GN=Dmel\CG15117 PE=1 SV=1	9785.02	9587.31	9630.4	9667.57	3.98532	0.010754	3	100	9258.12	9307.76	8974.98	9180.29	3.96286	0.0195558	3	114	0.949596	-0.0746146	0.015244
P29844;F3YDH0	42	31	226.531	0.0183458	1.73646	0.0155222	1.14302	0.816416	Control_Manganese	Experimental_No_Manganese	72375	Endoplasmic reticulum chaperone BiP OS=Drosophila melanogaster OX=7227 GN=Hsc70-3 PE=1 SV=2	10199	9679.04	9098.44	9658.84	3.98493	0.0570026	3	101	8424.85	8317.82	8608.25	8450.31	3.92687	0.0173817	3	130	0.874878	-0.192847	0.0213267
Q7KN94	16	10	62.372	0.0766381	1.11556	0.0415497	1.05777	0.440323	Control_Manganese	Experimental_No_Manganese	34295.4	Walrus_ isoform A OS=Drosophila melanogaster OX=7227 GN=wal PE=1 SV=1	9936.16	9265.84	9607.4	9603.13	3.98241	0.0349031	3	102	9295.94	9011.33	8928.77	9078.68	3.95802	0.0212174	3	116	0.945387	-0.0810226	0.0785377
P25007;Q7K2I4	18	8	81.2917	0.644432	0.190823	0.197632	1.01345	0.0677331	Control_Manganese	Experimental_No_Manganese	24951.4	Peptidyl-prolyl cis-trans isomerase OS=Drosophila melanogaster OX=7227 GN=Cyp1 PE=1 SV=2	9800.88	9076.87	9506.69	9461.48	3.97596	0.0384841	3	103	9389.87	9093.19	9524.76	9335.94	3.97016	0.0236485	3	110	0.986731	-0.0192706	0.636494
Q9VWH4;Q9VWH4-2	32	26	148.828	0.00420647	2.37608	0.00585154	1.06827	0.988623	Experimental_No_Manganese	Control_Manganese	41186.3	Probable isocitrate dehydrogenase [NAD] subunit alpha_ mitochondrial OS=Drosophila melanogaster OX=7227 GN=l(1)G0156 PE=2 SV=1	9577.3	9268.22	9278.86	9374.79	3.97196	0.0187159	3	104	9980.02	9981.76	10082.7	10014.8	4.00064	0.00586829	3	94	1.06827	0.0952767	0.00390421
Q8IPF4	5	1	27.4484	0.385333	0.414163	0.137808	1.02827	0.118463	Experimental_No_Manganese	Control_Manganese	118771	Uncharacterized protein OS=Drosophila melanogaster OX=7227 GN=Dmel\CG31897 PE=4 SV=1	9470.7	8891.69	9654.85	9339.08	3.9703	0.0426423	3	105	9478.29	9439.02	9892.08	9603.13	3.98241	0.0261381	3	107	1.02827	0.0402235	0.3863
Q9VBT8	19	14	100.872	0.000591866	3.22778	0.00182171	1.16385	0.999999	Experimental_No_Manganese	Control_Manganese	48772.5	IP11925p OS=Drosophila melanogaster OX=7227 GN=Dmel\CG11878 PE=2 SV=1	9242.21	9177.72	9448.63	9289.52	3.96799	0.0152341	3	106	11064.8	10595.2	10774.7	10811.6	4.03389	0.0219159	3	80	1.16385	0.218901	0.00067092
Q9V4P1;Q9V4P1-2;Q8T0J3	4	1	25.0033	0.0271563	1.56613	0.0204927	1.07814	0.72284	Experimental_No_Manganese	Control_Manganese	137174	Anillin OS=Drosophila melanogaster OX=7227 GN=scra PE=1 SV=3	9271.18	9146.37	9407	9274.85	3.96731	0.0140548	3	107	9597.84	10243.9	10157.1	9999.62	3.99998	0.0350658	3	95	1.07814	0.108549	0.028418
Q7KSU6;Q9VHN7	18	15	112.139	0.0364424	1.43839	0.0253021	1.05849	0.644489	Experimental_No_Manganese	Control_Manganese	63671.3	Uncharacterized protein_ isoform D OS=Drosophila melanogaster OX=7227 GN=Dmel\CG8036 PE=1 SV=1	9036.56	9464.99	9272.19	9257.91	3.96651	0.0231772	3	108	9687.24	10047.2	9663.88	9799.44	3.9912	0.0219275	3	102	1.05849	0.0820118	0.0366194
Q8MRN5	51	41	172.927	0.00117458	2.93012	0.00262364	1.21355	0.999937	Control_Manganese	Experimental_No_Manganese	107257	Aminopeptidase OS=Drosophila melanogaster OX=7227 GN=CG5839 PE=1 SV=1	9584.65	9078.24	9039.04	9233.98	3.96539	0.0329569	3	109	7792.65	7608.2	7426.34	7609.06	3.88133	0.0240703	3	144	0.824029	-0.279233	0.00137294
A0A1Z1CN92;Q9Y1T2	2	1	9.8983	0.127996	0.892804	0.060791	1.0353	0.313375	Control_Manganese	Experimental_No_Manganese	115570	Adenomatous polyposis coli 2_ isoform B OS=Drosophila melanogaster OX=7227 GN=Apc2 PE=1 SV=1	9170.86	9408.12	9092.18	9223.72	3.96491	0.0178309	3	110	8699.23	8869.57	9158.77	8909.19	3.94984	0.0260766	3	120	0.9659	-0.0500543	0.12817
Q9VF53	37	28	219.218	0.000209653	3.6785	0.000920376	1.20088	1	Experimental_No_Manganese	Control_Manganese	140893	Aldehyde oxidase 1 OS=Drosophila melanogaster OX=7227 GN=AOX1 PE=1 SV=1	9368.35	8949.3	9065.87	9127.84	3.96037	0.0236953	3	111	11048.4	10896.9	10939	10961.4	4.03987	0.00713845	3	76	1.20088	0.26409	0.000159452
Q9VRS0	2	1	9.9879	0.881978	0.0545421	0.247139	1.00663	0.0517782	Control_Manganese	Experimental_No_Manganese	49507.7	Importin subunit alpha OS=Drosophila melanogaster OX=7227 GN=alphaKap4 PE=2 SV=1	8549.34	9551.55	9278.2	9126.36	3.9603	0.0567665	3	112	8846.86	9048.1	9303.68	9066.21	3.95743	0.025253	3	117	0.993409	-0.00954005	0.86301
O02649;Q9VMN5	35	28	188.769	0.00122683	2.91122	0.00263495	1.07653	0.99992	Control_Manganese	Experimental_No_Manganese	60923.2	Heat shock protein 60A OS=Drosophila melanogaster OX=7227 GN=Hsp60A PE=1 SV=3	9225.48	9139.13	8995.1	9119.9	3.95999	0.0127622	3	113	8426.52	8428.26	8560.04	8471.6	3.92797	0.00904061	3	129	0.928914	-0.106383	0.00128724
Q9V7D2	14	8	70.548	0.0396431	1.40183	0.02681	1.04921	0.621337	Experimental_No_Manganese	Control_Manganese	27627.2	V-type proton ATPase subunit D 1 OS=Drosophila melanogaster OX=7227 GN=Vha36-1 PE=2 SV=1	9163.09	8784.68	9191.4	9046.39	3.95648	0.0251031	3	114	9612.51	9401.3	9460.75	9491.52	3.97734	0.0114749	3	108	1.04921	0.0692971	0.0376147
P13060	80	60	349.333	0.0182943	1.73769	0.0155122	1.08537	0.817027	Experimental_No_Manganese	Control_Manganese	95485.6	Elongation factor 2 OS=Drosophila melanogaster OX=7227 GN=EF2 PE=1 SV=4	9262.76	8826.75	9021.25	9036.92	3.95602	0.0241705	3	115	10062.7	9521.72	9840.82	9808.42	3.9916	0.0277255	3	101	1.08537	0.118189	0.0186021
O18640;M9PCC1;M9PB67;Q9VYQ9	17	14	86.4859	0.0318831	1.49644	0.0229632	1.03079	0.680694	Control_Manganese	Experimental_No_Manganese	36131.3	Guanine nucleotide-binding protein subunit beta-like protein OS=Drosophila melanogaster OX=7227 GN=Rack1 PE=1 SV=2	9102.99	8859.53	8924.03	8962.18	3.95241	0.014074	3	116	8744.47	8613.78	8725.27	8694.51	3.93925	0.00811633	3	126	0.970133	-0.0437451	0.0326593
P08570;M9PBK5	10	10	31.1102	0.309942	0.50872	0.118315	1.03667	0.147799	Control_Manganese	Experimental_No_Manganese	11570	60S acidic ribosomal protein P1 OS=Drosophila melanogaster OX=7227 GN=RpLP1 PE=1 SV=2	9135.01	8853.82	8263.18	8750.67	3.94204	0.0508503	3	118	8404.4	8373.48	8545.45	8441.11	3.9264	0.0108606	3	131	0.964625	-0.0519603	0.303327
P54399;X2JGP4;P54399-2	58	46	258.071	0.0790818	1.10192	0.0425792	1.05406	0.432048	Control_Manganese	Experimental_No_Manganese	56066.4	Protein disulfide-isomerase OS=Drosophila melanogaster OX=7227 GN=Pdi PE=2 SV=1	8843.23	8539.78	8631.76	8671.59	3.9381	0.0179437	3	119	8516.27	8220.68	7943.66	8226.87	3.91523	0.0348071	3	134	0.948715	-0.075953	0.0773625
Q8INK3	23	13	104.504	0.00020685	3.68434	0.000920376	1.07999	1	Control_Manganese	Experimental_No_Manganese	17251.4	Fatty acid binding protein_ isoform C OS=Drosophila melanogaster OX=7227 GN=fabp PE=1 SV=1	8649.08	8631.22	8704.84	8661.71	3.9376	0.00443366	3	120	8013.11	8098.24	7949.18	8020.18	3.90418	0.00932402	3	141	0.925934	-0.111018	0.000189272
Q9U1L2	40	33	127.694	0.000837365	3.07709	0.00214389	1.0593	0.999992	Control_Manganese	Experimental_No_Manganese	26120.2	EG:BACR7A4.14 protein OS=Drosophila melanogaster OX=7227 GN=EG:BACR7A4.14 PE=1 SV=1	8593.73	8600.91	8662.41	8619.02	3.93546	0.00437967	3	121	8125.54	8224.32	8059.79	8136.55	3.91044	0.010178	3	137	0.944023	-0.0831061	0.000781338
A0A0B4KFW5;A1ZBP3;Q86LF0	3	1	13.4445	0.00425796	2.3708	0.00585974	1.18197	0.98823	Control_Manganese	Experimental_No_Manganese	63184	Isopeptidase-T-3_ isoform C OS=Drosophila melanogaster OX=7227 GN=isopeptidase-T-3 PE=4 SV=1	8724.83	8262.09	8412.43	8466.45	3.9277	0.027881	3	122	7396.6	7256.16	6836.27	7163.01	3.8551	0.0407021	3	162	0.846047	-0.241191	0.00383955
P29413;Q53YH3	13	8	77.8916	0.23243	0.633708	0.0942483	1.04	0.193561	Control_Manganese	Experimental_No_Manganese	47150.7	Calreticulin OS=Drosophila melanogaster OX=7227 GN=Calr PE=1 SV=2	8852.33	8363.27	8098.51	8438.04	3.92624	0.0453226	3	123	8256.5	8050.59	8033.4	8113.5	3.90921	0.0153005	3	138	0.961539	-0.0565831	0.234647
P41126;M9PFF0	20	18	89.8906	0.0434923	1.36159	0.0283821	1.04906	0.595659	Experimental_No_Manganese	Control_Manganese	25065.3	60S ribosomal protein L13 OS=Drosophila melanogaster OX=7227 GN=RpL13 PE=1 SV=1	8247.56	8476.41	8407.22	8377.06	3.92309	0.0140105	3	124	8546.49	8960.88	8856.74	8788.03	3.94389	0.0245298	3	123	1.04906	0.0690957	0.0441142
P11996;X2J8F5	17	11	70.9878	7.52e-05	4.12378	0.000490084	1.24082	1	Experimental_No_Manganese	Control_Manganese	96085.2	Larval serum protein 1 beta chain OS=Drosophila melanogaster OX=7227 GN=Lsp1beta PE=2 SV=3	8285.36	8105.14	8415.8	8268.77	3.91744	0.0188651	3	125	10299.7	10122.5	10357.9	10260	4.01115	0.0119539	3	89	1.24082	0.311292	6.4316e-05
Q7JZZ3	13	11	52.2877	0.000503768	3.29777	0.00168307	1.06447	1	Experimental_No_Manganese	Control_Manganese	31101.6	RE03883p OS=Drosophila melanogaster OX=7227 GN=Dmel\CG13321 PE=1 SV=1	8137.78	8184.86	8251.82	8191.49	3.91336	0.006996	3	126	8706.39	8658.58	8793.88	8719.62	3.9405	0.00786851	3	124	1.06447	0.0901395	0.000514101
Q7KN75	28	18	142.693	0.0493125	1.30704	0.0305609	1.06013	0.560726	Experimental_No_Manganese	Control_Manganese	145018	Dodeca-satellite-binding protein 1_ isoform A OS=Drosophila melanogaster OX=7227 GN=Dp1 PE=1 SV=1	8289.58	8054.81	8127.72	8157.37	3.91155	0.0147298	3	127	8964.76	8406.97	8571.99	8647.91	3.93691	0.0331339	3	127	1.06013	0.0842476	0.0522004
A0A0B4LGZ5;P46222	2	1	13.0999	0.0654281	1.18424	0.0370658	1.08565	0.482756	Experimental_No_Manganese	Control_Manganese	21283.6	Ribosomal protein L11_ isoform B OS=Drosophila melanogaster OX=7227 GN=RpL11 PE=1 SV=1	8530.91	8208.12	7711.52	8150.18	3.91117	0.0506443	3	128	8707.76	9109.64	8727.3	8848.23	3.94686	0.0256089	3	121	1.08565	0.118557	0.062128
Q9VZ77	15	11	68.9336	0.506298	0.295593	0.166871	1.03651	0.0881727	Experimental_No_Manganese	Control_Manganese	508736	Dynein_ axonemal_ heavy chain 3_ isoform D OS=Drosophila melanogaster OX=7227 GN=Dnah3 PE=4 SV=3	7787.54	7923.1	8396.87	8035.84	3.90503	0.0398123	3	130	7682.06	8455.72	8849.8	8329.19	3.9206	0.0713235	3	132	1.03651	0.0517283	0.493318
Q9V674;B6IDY5	22	18	114.026	0.0149844	1.82436	0.0138144	1.09493	0.85769	Control_Manganese	Experimental_No_Manganese	60095.1	Cytochrome P450 6g1 OS=Drosophila melanogaster OX=7227 GN=Cyp6g1 PE=2 SV=1	8029.78	8246.25	7815.53	8030.52	3.90474	0.0268179	3	131	7144.72	7311.01	7547.02	7334.25	3.86536	0.0275635	3	154	0.913297	-0.130844	0.0150635
A0A0B4KHF0;Q9VA83	20	15	100.919	0.001358	2.8671	0.00279385	1.17989	0.999861	Control_Manganese	Experimental_No_Manganese	26423.6	Ferritin OS=Drosophila melanogaster OX=7227 GN=Fer2LCH PE=1 SV=1	7857.54	8144.41	7697.19	7899.71	3.89761	0.0286818	3	133	6793.76	6764.59	6527.56	6695.3	3.82577	0.0218059	3	182	0.847538	-0.238651	0.00150128
Q8MLY8;A0A0B4K6N1	26	20	94.0295	0.52802	0.27735	0.172143	1.01248	0.0841708	Experimental_No_Manganese	Control_Manganese	23873.5	40S ribosomal protein S8 OS=Drosophila melanogaster OX=7227 GN=RpS8 PE=1 SV=1	8134.54	7697.95	7720.96	7851.15	3.89493	0.031294	3	134	7992.91	7882.59	7971.93	7949.14	3.90032	0.0073697	3	142	1.01248	0.0178947	0.53843
P55841	24	17	72.539	0.745771	0.127394	0.219186	1.00593	0.0585979	Experimental_No_Manganese	Control_Manganese	19230.6	60S ribosomal protein L14 OS=Drosophila melanogaster OX=7227 GN=RpL14 PE=1 SV=1	7973.41	7765.94	7784.69	7841.35	3.89439	0.0146346	3	135	7705.19	8095.69	7862.73	7887.87	3.89696	0.0249067	3	143	1.00593	0.00853334	0.741122
P55828	7	1	39.5717	0.00188692	2.72425	0.00346283	1.12745	0.99933	Control_Manganese	Experimental_No_Manganese	13601.8	40S ribosomal protein S20 OS=Drosophila melanogaster OX=7227 GN=RpS20 PE=1 SV=1	7845.22	7915.14	7663.22	7807.86	3.89253	0.0166562	3	136	7108.65	6860.75	6806.36	6925.25	3.84044	0.0232678	3	171	0.886959	-0.17306	0.00179458
P41094	21	16	82.7694	0.00336324	2.47324	0.00499873	1.15858	0.994168	Control_Manganese	Experimental_No_Manganese	17668.6	40S ribosomal protein S18 OS=Drosophila melanogaster OX=7227 GN=RpS18 PE=1 SV=1	7979.94	7483.63	7956.48	7806.68	3.89247	0.0358688	3	137	6618.76	6725.95	6869.71	6738.14	3.82854	0.018688	3	179	0.863124	-0.212359	0.00381673
P06607;X2JEX8	26	20	140.487	0.0740659	1.13038	0.0404356	1.17435	0.449383	Control_Manganese	Experimental_No_Manganese	46329.5	Vitellogenin-3 OS=Drosophila melanogaster OX=7227 GN=Yp3 PE=1 SV=1	6825.93	8023.63	8377.47	7742.34	3.88887	0.105022	3	138	6346.37	6641.95	6790.38	6592.9	3.81908	0.0342844	3	189	0.851538	-0.231856	0.077746
Q7K511	20	11	113.11	0.04191	1.37768	0.0277643	1.04495	0.605946	Experimental_No_Manganese	Control_Manganese	58991.5	CG3835-RA OS=Drosophila melanogaster OX=7227 GN=D2hgdh PE=1 SV=1	7938.99	7683.83	7566.33	7729.72	3.88816	0.0246476	3	139	8154.44	8043.12	8033.99	8077.19	3.90726	0.00830282	3	139	1.04495	0.0634373	0.0407508
P02283	10	9	39.3822	0.0434407	1.3621	0.0283821	1.05077	0.595988	Control_Manganese	Experimental_No_Manganese	13696	Histone H2B OS=Drosophila melanogaster OX=7227 GN=His2B PE=1 SV=2	7896.61	7480.63	7799.62	7725.62	3.88793	0.0281708	3	140	7367.3	7396.58	7293.23	7352.37	3.86643	0.00724498	3	151	0.951687	-0.0714415	0.0447724
Q9VVI3	2	1	8.8636	0.742081	0.129549	0.218429	1.02554	0.0588633	Control_Manganese	Experimental_No_Manganese	115160	E3 ubiquitin-protein ligase Nedd-4 OS=Drosophila melanogaster OX=7227 GN=Nedd4 PE=1 SV=2	8560.59	7125.56	7459.92	7715.36	3.88736	0.0973177	3	141	7053.39	8036.5	7479.78	7523.23	3.8764	0.0655295	3	145	0.975097	-0.0363819	0.729801
P55830;P55830-2	31	26	127.896	0.299093	0.524194	0.114959	1.03213	0.153034	Control_Manganese	Experimental_No_Manganese	30568.2	40S ribosomal protein S3a OS=Drosophila melanogaster OX=7227 GN=RpS3A PE=1 SV=4	8039	7430.26	7638.18	7702.48	3.88663	0.0401714	3	142	7295.38	7615.71	7476.96	7462.68	3.87289	0.0215257	3	146	0.968867	-0.0456289	0.299375
Q0E8E8	23	19	105.257	0.00184113	2.73492	0.00341082	1.13831	0.999399	Control_Manganese	Experimental_No_Manganese	39363.7	MIP08013p1 OS=Drosophila melanogaster OX=7227 GN=Mpcp2 PE=1 SV=1	7644.9	7664.67	7765.97	7691.85	3.88603	0.00844402	3	143	6944.34	6778.76	6548.72	6757.27	3.82977	0.0294024	3	178	0.878498	-0.186889	0.00149785
Q9VNF3;Q9VNF4	15	14	63.0811	0.229118	0.63994	0.0934873	1.05687	0.196051	Control_Manganese	Experimental_No_Manganese	27032	RE01652p OS=Drosophila melanogaster OX=7227 GN=anon-WO0118547.83 PE=1 SV=1	8178.13	7481.6	7291.8	7650.51	3.88369	0.0610004	3	144	7385.23	7321.67	7009.51	7238.81	3.85967	0.0277809	3	160	0.946186	-0.0798039	0.233202
Q9VPH7;M9PD27;M9PFR9	2	1	8.2785	0.000543216	3.26503	0.00175487	1.32937	1	Control_Manganese	Experimental_No_Manganese	49388.2	Eukaryotic peptide chain release factor subunit 1 OS=Drosophila melanogaster OX=7227 GN=eRF1 PE=1 SV=2	7810.66	7307.48	7789.52	7635.89	3.88286	0.0372719	3	145	5559.21	5914.75	5758.01	5743.99	3.75921	0.031021	3	223	0.752236	-0.410743	0.00061764
Q9VRL0	9	9	42.7116	0.023463	1.62962	0.0185064	1.08345	0.759521	Control_Manganese	Experimental_No_Manganese	33878.3	Cytochrome c1_ isoform A OS=Drosophila melanogaster OX=7227 GN=Cyt-c1 PE=1 SV=1	7500.03	7594.88	7686.13	7593.68	3.88045	0.0122549	3	146	6882.73	6832.47	7311.19	7008.8	3.84564	0.037536	3	168	0.922978	-0.115632	0.0221551
Q9VAC1	28	21	159.771	0.00131357	2.88155	0.0027312	1.11079	0.999884	Control_Manganese	Experimental_No_Manganese	52310.8	GM14349p OS=Drosophila melanogaster OX=7227 GN=Dmel\CG7920 PE=1 SV=1	7591.04	7572.94	7595.99	7586.66	3.88005	0.00159917	3	147	6865.2	6661.03	6963.59	6829.94	3.83442	0.022596	3	176	0.900257	-0.151592	0.00106652
Q3YMU0	33	24	161.684	0.331181	0.479934	0.123855	1.04039	0.138386	Control_Manganese	Experimental_No_Manganese	55712.9	Protein disulfide-isomerase (Fragment) OS=Drosophila melanogaster OX=7227 GN=ERp60 PE=1 SV=1	7830.64	7570.67	7294.55	7565.29	3.87883	0.0354361	3	148	7608.56	7337.16	6868.97	7271.56	3.86163	0.0514517	3	159	0.961175	-0.0571288	0.33103
Q7KUC2	18	13	73.5241	0.163548	0.786355	0.072813	1.04381	0.260172	Control_Manganese	Experimental_No_Manganese	33485.5	FI04467p OS=Drosophila melanogaster OX=7227 GN=Pdxk PE=1 SV=1	7587.81	7280.72	7665.6	7511.38	3.87572	0.0270932	3	149	7293.31	7376.2	6918.76	7196.09	3.8571	0.0338689	3	161	0.958026	-0.0618634	0.160575
P39018;E2QD65	16	14	71.8906	0.0811213	1.09087	0.0433194	1.06806	0.425376	Control_Manganese	Experimental_No_Manganese	17405.2	40S ribosomal protein S19a OS=Drosophila melanogaster OX=7227 GN=RpS19a PE=1 SV=3	7796.15	7173.21	7486.85	7485.41	3.87422	0.0416104	3	150	6884.58	6924.98	7215.73	7008.43	3.84562	0.0257781	3	169	0.936279	-0.0949891	0.0834543
P07486	15	4	102.433	0.678125	0.16869	0.204533	1.00518	0.0642448	Experimental_No_Manganese	Control_Manganese	35521.6	Glyceraldehyde-3-phosphate dehydrogenase 1 OS=Drosophila melanogaster OX=7227 GN=Gapdh1 PE=2 SV=2	7485.96	7264.51	7481.87	7410.78	3.86986	0.0170954	3	151	7529.64	7448.11	7369.75	7449.17	3.87211	0.0107327	3	147	1.00518	0.00745343	0.680132
Q9V3J1;M9PDK5;Q9V3J1-3;Q9V3J1-2	36	34	150.828	0.956802	0.0191777	0.263571	1.00083	0.050236	Experimental_No_Manganese	Control_Manganese	54190.2	V-type proton ATPase subunit H OS=Drosophila melanogaster OX=7227 GN=VhaSFD PE=2 SV=2	7438.64	7137.23	7655.38	7410.42	3.86984	0.035116	3	152	7445.35	7338.25	7466.06	7416.55	3.8702	0.00924897	3	149	1.00083	0.00119463	0.970377
Q9VQB4	43	32	209.068	0.754243	0.122489	0.220845	1.00547	0.0580062	Control_Manganese	Experimental_No_Manganese	37342.6	LD06553p OS=Drosophila melanogaster OX=7227 GN=Dmel\CG3609 PE=1 SV=1	7314.09	7513.43	7206.22	7344.58	3.86597	0.0212206	3	153	7288.72	7179.22	7445.9	7304.61	3.8636	0.0183515	3	156	0.994558	-0.00787192	0.753247
Q9VAD3;Q1RKY3	30	15	146.395	3.63649e-05	4.43932	0.00040248	1.19789	1	Control_Manganese	Experimental_No_Manganese	429322	Vacuolar protein sorting 13B_ isoform A OS=Drosophila melanogaster OX=7227 GN=Vps13B PE=4 SV=3	7288.1	7324.5	7328.63	7313.74	3.86414	0.00304987	3	154	6077.08	6029.44	6210.08	6105.53	3.78572	0.0153333	3	210	0.834803	-0.260493	2.6463e-05
P20478;X2JDA5;X2JJG8;P20478-3;P20478-2	15	12	58.7125	6.38627e-05	4.19475	0.000490084	1.20409	1	Control_Manganese	Experimental_No_Manganese	41988.7	Glutamine synthetase 2 cytoplasmic OS=Drosophila melanogaster OX=7227 GN=Gs2 PE=2 SV=3	7360.68	7366.44	7186.97	7304.7	3.8636	0.013963	3	155	5989.56	6075.76	6134.46	6066.59	3.78294	0.0120141	3	212	0.830506	-0.267938	6.84996e-05
Q9V9W2;Q9V9W3	11	8	55.5676	0.567383	0.246124	0.181227	1.01204	0.0777449	Experimental_No_Manganese	Control_Manganese	27754.9	Ribosomal protein L6_ isoform A OS=Drosophila melanogaster OX=7227 GN=RpL6 PE=1 SV=1	7529.34	7317.99	7059.08	7302.13	3.86345	0.0322551	3	156	7437.45	7296.29	7436.33	7390.02	3.86865	0.0109846	3	150	1.01204	0.0172601	0.574201
P61857	31	12	128.004	0.79075	0.101961	0.228454	1.01003	0.0557256	Experimental_No_Manganese	Control_Manganese	50440.4	Tubulin beta-2 chain OS=Drosophila melanogaster OX=7227 GN=betaTub85D PE=1 SV=1	7020.48	7158.02	7615.28	7264.59	3.86121	0.0428643	3	157	6973.3	7522.84	7516.32	7337.49	3.86555	0.0429864	3	152	1.01003	0.0144038	0.789897
P02844;X2JB25	14	11	75.7817	0.128395	0.891452	0.0608348	1.0395	0.312667	Control_Manganese	Experimental_No_Manganese	49774.5	Vitellogenin-2 OS=Drosophila melanogaster OX=7227 GN=Yp2 PE=1 SV=2	7538.91	7106.74	7138.04	7261.23	3.86101	0.0331883	3	158	7037.48	7024.24	6894.15	6985.29	3.84418	0.0113392	3	170	0.961998	-0.055894	0.132651
M9PE30	19	8	86.4899	0.0436454	1.36006	0.0283872	1.04732	0.594682	Control_Manganese	Experimental_No_Manganese	19634.1	Transgelin OS=Drosophila melanogaster OX=7227 GN=Chd64 PE=1 SV=1	7426.31	7138.82	7053.42	7206.18	3.85771	0.0271103	3	159	6918.67	6863.54	6859.52	6880.58	3.83762	0.00480398	3	174	0.954816	-0.0667058	0.0465685
Q9VLH9	46	35	175.696	4.42524e-05	4.35406	0.000421902	1.44534	1	Control_Manganese	Experimental_No_Manganese	115460	Alpha-mannosidase OS=Drosophila melanogaster OX=7227 GN=LManVI PE=1 SV=2	6950.4	7391.17	7221.15	7187.57	3.85658	0.0309274	3	161	4903.87	4996.79	5018.1	4972.92	3.69661	0.0122146	3	264	0.691878	-0.531411	7.63064e-05
Q9VE34;A0A0B4K6N7	10	6	45.1069	0.000216618	3.66431	0.000920376	1.40114	1	Experimental_No_Manganese	Control_Manganese	283429	Ectopic P granules protein 5 homolog OS=Drosophila melanogaster OX=7227 GN=CG14299 PE=1 SV=2	6841.67	7189.66	7359.76	7130.36	3.85311	0.0370368	3	162	9704.81	10040.6	10226.5	9990.63	3.99959	0.0264661	3	96	1.40114	0.486601	0.00018711
A1Z6K6	1	1	4.6642	0.424509	0.372113	0.1475	1.06903	0.106884	Control_Manganese	Experimental_No_Manganese	15993.5	Uncharacterized protein OS=Drosophila melanogaster OX=7227 GN=Dmel\CG30432 PE=4 SV=2	7947.32	7008.21	6331.01	7095.51	3.85098	0.114394	3	163	6998.13	6488.73	6425.1	6637.32	3.82199	0.0473213	3	184	0.935425	-0.0963057	0.413435
P38979	17	14	69.4631	0.574636	0.240607	0.182916	1.02733	0.0766663	Control_Manganese	Experimental_No_Manganese	30285.3	40S ribosomal protein SA OS=Drosophila melanogaster OX=7227 GN=sta PE=1 SV=3	6725.11	7501.93	7024.45	7083.83	3.85027	0.0553088	3	164	6546.17	6864.96	7274.92	6895.35	3.83856	0.0529812	3	173	0.973393	-0.0389058	0.57517
Q9VFP1	31	23	159.495	0.0282128	1.54955	0.0211674	1.0368	0.712974	Experimental_No_Manganese	Control_Manganese	57612.7	Probable cytochrome P450 6d5 OS=Drosophila melanogaster OX=7227 GN=Cyp6d5 PE=2 SV=1	7030.49	7084.78	7108.84	7074.71	3.84971	0.00567287	3	165	7287.25	7235.53	7482.3	7335.03	3.8654	0.0177426	3	153	1.0368	0.0521317	0.0296348
Q9V405	7	2	32.3559	0.0228687	1.64076	0.018318	1.05872	0.765758	Control_Manganese	Experimental_No_Manganese	47112.9	26S proteasome regulatory complex subunit p48A OS=Drosophila melanogaster OX=7227 GN=Rpt3 PE=1 SV=1	7251.13	6936.89	7002.11	7063.38	3.84901	0.0234781	3	166	6651.14	6776.56	6587.08	6671.59	3.82423	0.0144464	3	183	0.944534	-0.082326	0.0240604
P02843;X2JD55	24	14	104.976	0.00294582	2.53079	0.00458765	1.1476	0.996233	Control_Manganese	Experimental_No_Manganese	48768.8	Vitellogenin-1 OS=Drosophila melanogaster OX=7227 GN=Yp1 PE=1 SV=1	7255.58	6830.47	7082.07	7056.04	3.84856	0.0302924	3	167	6002.46	6235.2	6207.95	6148.54	3.78877	0.0206938	3	208	0.871387	-0.198615	0.00320863
Q9VGS2;A0A126GUT1	12	10	56.2557	2.78312e-06	5.55547	0.000135988	1.19278	1	Control_Manganese	Experimental_No_Manganese	19808.6	Translationally-controlled tumor protein homolog OS=Drosophila melanogaster OX=7227 GN=Tctp PE=1 SV=1	6968.55	6967.07	7062.15	6999.26	3.84505	0.00778262	3	170	5860.76	5880.32	5862.99	5868.02	3.76849	0.00182486	3	221	0.838378	-0.254327	3.84614e-06
P54385-2;A0A0C4DHE7	29	1	216.8	0.000473953	3.32426	0.00162616	1.11755	1	Control_Manganese	Experimental_No_Manganese	61481.1	Isoform C of Glutamate dehydrogenase_ mitochondrial OS=Drosophila melanogaster OX=7227 GN=Gdh	6945.08	6937.02	7047.89	6976.66	3.84365	0.00886056	3	171	6137.68	6338.75	6252.06	6242.83	3.79538	0.0161551	3	203	0.894816	-0.160337	0.000425268
Q02748;C9QP42	23	14	120.92	0.189369	0.722691	0.0811657	1.04526	0.230972	Experimental_No_Manganese	Control_Manganese	46277.9	Eukaryotic initiation factor 4A OS=Drosophila melanogaster OX=7227 GN=eIF4A PE=1 SV=3	6964.59	6894.09	7052.3	6970.33	3.84325	0.0113707	3	172	7616	7299.87	6941.45	7285.78	3.86248	0.0463222	3	157	1.04526	0.0638565	0.190142
P02825;P82910;Q8INI8;Q9BIR7;Q9BIS2;Q9VG58;P11146	5	2	45.62	0.00369891	2.43193	0.00530551	1.08409	0.992171	Control_Manganese	Experimental_No_Manganese	70559.3	Major heat shock 70 kDa protein Ab OS=Drosophila melanogaster OX=7227 GN=Hsp70Ab PE=2 SV=3	6945.78	6851.26	7086.25	6961.1	3.84268	0.0169854	3	173	6452.24	6501.25	6309.88	6421.12	3.80761	0.0154818	3	195	0.92243	-0.116489	0.00375599
P13607;P13607-4;P13607-5;A0A0B4KGG8;E1JIR4;P13607-2;P13607-6;P13607-7;P13607-3	28	20	162.75	0.0424827	1.37179	0.0279566	1.08068	0.60218	Experimental_No_Manganese	Control_Manganese	116575	Sodium/potassium-transporting ATPase subunit alpha OS=Drosophila melanogaster OX=7227 GN=Atpalpha PE=1 SV=3	6972.37	6562.71	6777.49	6770.85	3.83064	0.0302636	3	174	7476.29	7443.57	7031.56	7317.14	3.86434	0.0338743	3	155	1.08068	0.111942	0.0422969
Q7KN97;Q0E9E2	60	47	303.106	0.267972	0.571911	0.105583	1.03517	0.169942	Experimental_No_Manganese	Control_Manganese	131605	Pyruvate carboxylase OS=Drosophila melanogaster OX=7227 GN=PCB PE=1 SV=1	6900.92	6622.45	6483.37	6668.91	3.82406	0.0318822	3	176	7036.68	7038.56	6635.15	6903.46	3.83907	0.0336592	3	172	1.03517	0.0498684	0.266627
Q9VIC9	13	9	62.1255	0.000157254	3.8034	0.000852877	1.36123	1	Experimental_No_Manganese	Control_Manganese	101268	10-formyltetrahydrofolate dehydrogenase OS=Drosophila melanogaster OX=7227 GN=Dmel\CG8665 PE=1 SV=3	6718.98	6342.68	6693.21	6584.95	3.81855	0.0319233	3	178	9181.11	8886.85	8822.94	8963.63	3.95248	0.021312	3	119	1.36123	0.44491	0.00013137
B7Z0T5;A0A0B4KG70;Q9VNF6;Q9VNF7	4	2	10.2211	0.00433567	2.36294	0.00588467	1.09996	0.987625	Control_Manganese	Experimental_No_Manganese	94497.6	Metastasis associated 1-like_ isoform C OS=Drosophila melanogaster OX=7227 GN=MTA1-like PE=1 SV=1	6418.54	6531.31	6745.89	6565.25	3.81725	0.0253288	3	179	6056.95	5919.4	5929.6	5968.65	3.77588	0.0128398	3	216	0.909128	-0.137445	0.00485389
P54385;Q8IMY1	46	15	229.367	0.00347807	2.45866	0.00507802	1.04027	0.993518	Control_Manganese	Experimental_No_Manganese	62935.7	Glutamate dehydrogenase_ mitochondrial OS=Drosophila melanogaster OX=7227 GN=Gdh PE=1 SV=2	6536.92	6635.22	6517.9	6563.35	3.81713	0.00959367	3	180	6349.67	6289.14	6289.09	6309.3	3.79998	0.00554056	3	199	0.961293	-0.0569516	0.0036326
Q06559;G3M3A2	20	14	70.9989	0.0207883	1.68218	0.0171435	1.0881	0.78835	Experimental_No_Manganese	Control_Manganese	27699.2	40S ribosomal protein S3 OS=Drosophila melanogaster OX=7227 GN=RpS3 PE=1 SV=1	6648.25	6291.33	6696.11	6545.23	3.81593	0.0337931	3	181	6967.29	7149.04	7249.34	7121.89	3.8526	0.020075	3	164	1.0881	0.121816	0.0192289
Q9VTY2	4	4	20.5465	0.000803447	3.09504	0.00213648	1.14279	0.999994	Control_Manganese	Experimental_No_Manganese	36024.3	Uncharacterized protein_ isoform A OS=Drosophila melanogaster OX=7227 GN=anon-WO0172774.89 PE=1 SV=1	6468.68	6434.58	6720.33	6541.19	3.81566	0.0238592	3	182	5681.44	5709.55	5780.66	5723.89	3.75769	0.00893422	3	224	0.875052	-0.192559	0.000995876
Q24251;A0A0B4LHL7	21	18	77.9938	0.124452	0.904997	0.0597637	1.01443	0.319805	Control_Manganese	Experimental_No_Manganese	20257.8	ATP synthase subunit d_ mitochondrial OS=Drosophila melanogaster OX=7227 GN=ATPsynD PE=2 SV=2	6483.27	6573.98	6542.35	6533.2	3.81513	0.00704752	3	184	6505.92	6446.24	6368.6	6440.25	3.8089	0.0106913	3	193	0.985773	-0.0206723	0.123868
Q9VS22	8	7	29.8195	5.15629e-05	4.28766	0.000458082	1.54487	1	Control_Manganese	Experimental_No_Manganese	9435.76	Uncharacterized protein_ isoform A OS=Drosophila melanogaster OX=7227 GN=Acbp3 PE=1 SV=2	6203.83	6685.22	6586.12	6491.73	3.81236	0.0391575	3	185	4164.39	4251.4	4190.55	4202.11	3.62347	0.0106236	3	324	0.647303	-0.627487	0.00010466
O77460;A0A0B4K7G9;B7YZQ7	17	13	110.088	0.200335	0.698243	0.0847506	1.03633	0.220296	Control_Manganese	Experimental_No_Manganese	38167.3	Inorganic pyrophosphatase OS=Drosophila melanogaster OX=7227 GN=Nurf-38 PE=1 SV=3	6511.5	6319.41	6560.92	6463.94	3.8105	0.0197383	3	186	6472.52	6208.52	6030.96	6237.33	3.795	0.0356226	3	204	0.964943	-0.051485	0.200308
Q9VTQ9	4	1	19.4097	6.50333e-05	4.18686	0.000490084	1.11416	1	Control_Manganese	Experimental_No_Manganese	45264.3	AT06668p OS=Drosophila melanogaster OX=7227 GN=Rpt4R PE=2 SV=1	6474.21	6384.33	6479.51	6446.02	3.80929	0.00829766	3	187	5749.9	5778.03	5828.66	5785.53	3.76234	0.00689873	3	222	0.897535	-0.155959	6.79411e-05
O96553;A0A0B4K623;O96553-2	11	7	60.4162	0.132149	0.878936	0.0622364	1.0405	0.306144	Control_Manganese	Experimental_No_Manganese	104188	C-1-tetrahydrofolate synthase_ cytoplasmic OS=Drosophila melanogaster OX=7227 GN=pug PE=2 SV=4	6258.97	6588.13	6440.03	6429.04	3.80815	0.0256422	3	188	6246.81	6292.05	5997.49	6178.78	3.7909	0.0256724	3	206	0.961073	-0.0572822	0.131033
Q9VV51;D5AEK7;Q961F9	5	3	27.2925	0.353029	0.45219	0.12994	1.05272	0.129713	Experimental_No_Manganese	Control_Manganese	44910.6	RE10780p OS=Drosophila melanogaster OX=7227 GN=Agpat3 PE=1 SV=1	6583.39	6685.34	5914.79	6394.51	3.80581	0.0654567	3	189	7152.9	6552.11	6489.91	6731.64	3.82812	0.0543914	3	180	1.05272	0.074125	0.352954
M9PC74;Q7K1W8	3	2	16.9586	0.0017474	2.75761	0.00329974	1.15401	0.999525	Control_Manganese	Experimental_No_Manganese	39148.1	Uncharacterized protein_ isoform G OS=Drosophila melanogaster OX=7227 GN=RCN2 PE=1 SV=1	6216.81	6277.46	6383.03	6292.43	3.79882	0.0133676	3	191	5415.99	5306.17	5635.85	5452.67	3.73661	0.0307873	3	239	0.866543	-0.206656	0.00149617
Q9VQ61;Q8IPY3	30	23	103.994	0.219908	0.657759	0.0903155	1.02877	0.203278	Experimental_No_Manganese	Control_Manganese	47584.5	Aspartate aminotransferase OS=Drosophila melanogaster OX=7227 GN=Got2 PE=1 SV=1	6162.86	6251.73	6378.08	6264.22	3.79687	0.0172654	3	192	6237.12	6505.01	6591.11	6444.41	3.80918	0.0286469	3	192	1.02877	0.0409135	0.218411
M9PF61	28	10	147.576	0.00920944	2.03577	0.0101121	1.12303	0.933143	Control_Manganese	Experimental_No_Manganese	40536.6	Uncharacterized protein_ isoform C OS=Drosophila melanogaster OX=7227 GN=ESTS:34F4T PE=1 SV=1	6216.28	5968.83	6439.91	6208.34	3.79298	0.0379561	3	194	5510.59	5641.17	5432.91	5528.22	3.74259	0.019038	3	235	0.890451	-0.167392	0.0103037
Q9VXC7	5	5	28.9345	0.00960376	2.01756	0.0104132	1.1118	0.928009	Control_Manganese	Experimental_No_Manganese	28209.4	RE37738p OS=Drosophila melanogaster OX=7227 GN=Dmel\CG9673 PE=1 SV=1	6223.58	5979.65	6409	6204.08	3.79268	0.0347086	3	195	5636.14	5641.19	5463.26	5580.2	3.74665	0.0181534	3	232	0.899441	-0.1529	0.0104905
X2JEK5	1	1	5.1857	0.0181725	1.74058	0.015467	1.08526	0.818471	Control_Manganese	Experimental_No_Manganese	21184	Uncharacterized protein OS=Drosophila melanogaster OX=7227 GN=lincRNA.970 PE=4 SV=1	6206.24	6063.02	6178.94	6149.4	3.78883	0.0123654	3	196	5714.07	5451.22	5833.55	5666.28	3.7533	0.034519	3	227	0.921436	-0.118044	0.0162992
C0HKA1;C0HKA0;X2JCX8	19	17	59.3915	0.642369	0.192216	0.197404	1.01735	0.0679628	Control_Manganese	Experimental_No_Manganese	16321.8	40S ribosomal protein S14b OS=Drosophila melanogaster OX=7227 GN=RpS14b PE=2 SV=1	5790.34	6418.67	6200.82	6136.61	3.78793	0.0519915	3	197	5882.09	6125.3	6088.48	6031.96	3.78046	0.0217328	3	215	0.982946	-0.024816	0.627013
Q9GU68	4	4	23.5722	0.0723316	1.14067	0.0398225	1.03011	0.455705	Control_Manganese	Experimental_No_Manganese	17933.3	Eukaryotic translation initiation factor 5A OS=Drosophila melanogaster OX=7227 GN=eEF5 PE=2 SV=2	6155.98	5980.54	6202.54	6113.02	3.78626	0.0191513	3	198	5882.01	5985.15	5935.86	5934.34	3.77337	0.00869272	3	217	0.97077	-0.0427984	0.0728312
P91938;P91938-2;P91938-3;P91938-4;Q9VNT5	19	16	109.35	0.0352925	1.45232	0.0247677	1.07969	0.653245	Control_Manganese	Experimental_No_Manganese	65063.9	Thioredoxin reductase 1_ mitochondrial OS=Drosophila melanogaster OX=7227 GN=Trxr-1 PE=1 SV=2	6006.24	5993.55	6251.26	6083.68	3.78417	0.0238776	3	199	5565.47	5861.04	5477.46	5634.66	3.75087	0.0356601	3	229	0.926192	-0.110617	0.0349564
A8DZ29;O61380	23	13	103.119	0.219948	0.65768	0.0903155	1.08863	0.203246	Control_Manganese	Experimental_No_Manganese	212093	Eukaryotic translation initiation factor 4G1_ isoform B OS=Drosophila melanogaster OX=7227 GN=eIF4G1 PE=1 SV=1	5432.13	6082.18	6583.28	6032.53	3.7805	0.0956783	3	200	5453.4	5605.73	5565	5541.38	3.74362	0.0142318	3	234	0.918583	-0.122518	0.217989
Q9W197	1	1	5.1427	0.000154507	3.81105	0.000852877	1.60207	1	Control_Manganese	Experimental_No_Manganese	36408.3	7-methylguanosine phosphate-specific 5'-nucleotidase OS=Drosophila melanogaster OX=7227 GN=cN-IIIB PE=1 SV=1	6331.83	5701.05	5986.87	6006.58	3.77863	0.0525846	3	201	3758.77	3841.15	3647.85	3749.26	3.57395	0.0258713	3	379	0.624191	-0.679939	0.000291983
Q9VU84	6	4	27.252	6.83047e-05	4.16555	0.000490084	1.64141	1	Experimental_No_Manganese	Control_Manganese	58843.4	Drebrin-like protein OS=Drosophila melanogaster OX=7227 GN=Abp1 PE=1 SV=1	5992.83	5773.42	6197.03	5987.76	3.77726	0.0353808	3	202	10211.2	9523.01	9750.9	9828.39	3.99248	0.0356724	3	99	1.64141	0.714937	8.41399e-05
O44386;O44386-2	11	6	53.0851	0.000776855	3.10966	0.00209426	1.29466	0.999995	Control_Manganese	Experimental_No_Manganese	125343	Integrin alpha-PS3 OS=Drosophila melanogaster OX=7227 GN=scb PE=1 SV=2	6203.9	5886.72	5850.91	5980.51	3.77674	0.0324865	3	203	4655.53	4765.81	4436.74	4619.36	3.66458	0.0362584	3	292	0.772402	-0.372576	0.000778421
Q7KW39;Q7KW39-2	23	18	118.153	0.0210836	1.67606	0.0172415	1.13681	0.785071	Control_Manganese	Experimental_No_Manganese	56314.7	Probable methylmalonate-semialdehyde dehydrogenase [acylating]_ mitochondrial OS=Drosophila melanogaster OX=7227 GN=CG17896 PE=2 SV=1	6166.38	5976.24	5756.94	5966.52	3.77572	0.0343402	3	204	5504.15	4983.77	5257.49	5248.47	3.72003	0.0495968	3	247	0.879653	-0.184994	0.019872
P20432;Q9VG96	17	13	97.4971	0.00110238	2.95767	0.00254979	1.1199	0.999956	Experimental_No_Manganese	Control_Manganese	24037.5	Glutathione S-transferase D1 OS=Drosophila melanogaster OX=7227 GN=GstD1 PE=1 SV=1	5855.8	5788.13	6018.57	5887.5	3.76993	0.0201183	3	205	6511.25	6669.61	6599.36	6593.41	3.81911	0.0120339	3	188	1.1199	0.16337	0.00101531
P05389	9	6	52.1926	0.0139204	1.85635	0.0131534	1.11485	0.871322	Control_Manganese	Experimental_No_Manganese	11757.2	60S acidic ribosomal protein P2 OS=Drosophila melanogaster OX=7227 GN=RpLP2 PE=1 SV=1	6030.92	5573.16	6012.86	5872.31	3.76881	0.0441449	3	207	5258.16	5265.51	5278.47	5267.38	3.72159	0.00195192	3	245	0.896985	-0.156844	0.0156213
Q9W5R8;R9Q794	14	9	74.3231	0.0243925	1.61274	0.0190122	1.07127	0.749957	Experimental_No_Manganese	Control_Manganese	34265.1	60S ribosomal protein L5 OS=Drosophila melanogaster OX=7227 GN=RpL5 PE=1 SV=2	6045.59	5741.35	5822.68	5869.87	3.76863	0.0268341	3	208	6242.93	6184.87	6436.88	6288.23	3.79853	0.0209876	3	200	1.07127	0.0993232	0.0243145
Q7K485	10	8	71.2316	0.000960481	3.01751	0.00229141	1.11766	0.999981	Experimental_No_Manganese	Control_Manganese	42814.9	CathD_ isoform A OS=Drosophila melanogaster OX=7227 GN=cathD PE=1 SV=1	5717.28	5903.68	5858.71	5826.56	3.76541	0.0166941	3	209	6554.89	6404.43	6577.07	6512.13	3.81372	0.014424	3	190	1.11766	0.160486	0.000927269
Q9VFG5;H8F4T3	19	16	107.085	0.000389686	3.40929	0.00143703	1.47851	1	Experimental_No_Manganese	Control_Manganese	33433.8	RE17477p OS=Drosophila melanogaster OX=7227 GN=smp-30 PE=1 SV=1	6124.04	5425.05	5815.77	5788.29	3.76255	0.0605192	3	210	8665.75	8485.05	8523.35	8558.05	3.93237	0.0111259	3	128	1.47851	0.564146	0.00018942
Q9VBV4	2	2	4.4621	0.042192	1.37477	0.0278121	1.09137	0.604086	Experimental_No_Manganese	Control_Manganese	28350.7	LP07620p OS=Drosophila melanogaster OX=7227 GN=CT33073 PE=2 SV=2	5891.55	5932.24	5414.77	5746.18	3.75938	0.0500744	3	211	6270.96	6205.21	6337.48	6271.21	3.79735	0.0105454	3	201	1.09137	0.126141	0.0369262
Q8IRH1;Q8IRH0;Q9W0E4	22	11	114.545	0.000213445	3.67071	0.000920376	1.43952	1	Experimental_No_Manganese	Control_Manganese	123557	FI19310p1 OS=Drosophila melanogaster OX=7227 GN=Psa PE=1 SV=1	5566.42	5808.88	5848.29	5741.2	3.759	0.0265867	3	212	8044.42	8087.38	8661.88	8264.56	3.91722	0.0417155	3	133	1.43952	0.525587	0.000316438
Q9VE00	21	14	120.237	0.00182149	2.73957	0.00339051	1.19824	0.999427	Control_Manganese	Experimental_No_Manganese	62004.9	Probable cytochrome P450 12a4_ mitochondrial OS=Drosophila melanogaster OX=7227 GN=Cyp12a4 PE=2 SV=2	5975.02	5522.87	5675.64	5724.51	3.75774	0.0401785	3	214	4809.29	4824.49	4698.54	4777.44	3.6792	0.014391	3	282	0.834559	-0.260915	0.00239909
P36951	13	9	60.9196	0.0359282	1.44456	0.0250787	1.05664	0.648375	Experimental_No_Manganese	Control_Manganese	29207.1	Putative hydroxypyruvate isomerase OS=Drosophila melanogaster OX=7227 GN=Gip PE=2 SV=1	5847.78	5535.55	5751.8	5711.71	3.75677	0.0280001	3	215	5953.79	6103.21	6048.66	6035.22	3.78069	0.0125283	3	214	1.05664	0.0794845	0.0339379
Q9W229	8	7	21.713	0.0160802	1.79371	0.014408	1.11773	0.843917	Control_Manganese	Experimental_No_Manganese	15104.8	40S ribosomal protein S24 OS=Drosophila melanogaster OX=7227 GN=RpS24 PE=1 SV=1	5981.33	5589.72	5469.73	5680.26	3.75437	0.0471019	3	217	5134.53	5085.34	5026.03	5081.97	3.70603	0.0106898	3	258	0.894671	-0.16057	0.0191739
Q9VFF0	25	19	104.309	0.41912	0.377661	0.145887	1.02963	0.10836	Control_Manganese	Experimental_No_Manganese	52558.5	GH01077p OS=Drosophila melanogaster OX=7227 GN=UQCR-C1 PE=1 SV=2	5888.35	5421.14	5608.2	5639.23	3.75122	0.0416984	3	218	5716.95	5355.78	5358.13	5476.95	3.73854	0.037949	3	237	0.971223	-0.0421249	0.421089
A0A0B4LIJ0;P48601	10	4	54.2833	0.883628	0.0537307	0.247424	1.00424	0.0517283	Control_Manganese	Experimental_No_Manganese	49494.8	Regulatory particle triple-A ATPase 2_ isoform B OS=Drosophila melanogaster OX=7227 GN=Rpt2 PE=3 SV=1	5410.04	5605.48	5814.89	5610.14	3.74897	0.0360885	3	219	5417.45	5656.11	5685.75	5586.44	3.74714	0.0263308	3	231	0.995776	-0.00610693	0.877674
Q9VW26	8	7	45.1661	0.205825	0.686502	0.0864185	1.02125	0.215275	Control_Manganese	Experimental_No_Manganese	47767.8	Ornithine aminotransferase_ mitochondrial OS=Drosophila melanogaster OX=7227 GN=Oat PE=2 SV=1	5675.96	5448.63	5647.74	5590.78	3.74747	0.0221628	3	220	5420.94	5488.53	5513.93	5474.47	3.73834	0.00877954	3	238	0.979197	-0.0303293	0.204163
Q9W334;X2JEM4	10	9	38.2639	3.91264e-05	4.40753	0.00040248	1.10985	1	Control_Manganese	Experimental_No_Manganese	7533.76	40S ribosomal protein S28 OS=Drosophila melanogaster OX=7227 GN=RpS28b PE=1 SV=2	5540.59	5580.89	5587.42	5569.63	3.74583	0.00455362	3	221	4981.02	5060.42	5013.68	5018.37	3.70056	0.00795302	3	261	0.901025	-0.150362	3.55159e-05
P31009;M9PB84	21	19	91.3085	0.000848737	3.07123	0.00214389	1.10046	0.999992	Experimental_No_Manganese	Control_Manganese	29127.7	40S ribosomal protein S2 OS=Drosophila melanogaster OX=7227 GN=RpS2 PE=1 SV=2	5560.26	5667.34	5465.01	5564.2	3.7454	0.0181922	3	222	6126.47	6141.22	6101.91	6123.2	3.78698	0.00324295	3	209	1.10046	0.138111	0.000717866
P13395;M9PBI5;M9PDQ0;M9PGV6	75	52	367.041	0.00694355	2.15842	0.00827626	1.1119	0.961368	Experimental_No_Manganese	Control_Manganese	279273	Spectrin alpha chain OS=Drosophila melanogaster OX=7227 GN=alpha-Spec PE=1 SV=2	5398.43	5597.56	5690.84	5562.27	3.74525	0.0268533	3	223	6125.86	6075.04	6353.19	6184.7	3.79132	0.023949	3	205	1.1119	0.153028	0.00686223
M9PHM6;Q9VS34	3	2	18.1928	0.370996	0.430631	0.134684	1.02321	0.123244	Experimental_No_Manganese	Control_Manganese	21835.6	Ribosomal protein L18_ isoform B OS=Drosophila melanogaster OX=7227 GN=RpL18 PE=4 SV=1	5424.04	5604.89	5646.63	5558.52	3.74496	0.0212855	3	224	5495.79	5699.84	5867.05	5687.56	3.75493	0.0326915	3	226	1.02321	0.0331091	0.367871
Q8T4C4	14	3	100.529	0.993457	0.00285092	0.270806	1.03553	0.0500054	Control_Manganese	Experimental_No_Manganese	68052.3	ATP synthase subunit beta OS=Drosophila melanogaster OX=7227 GN=ATPsynbetaL PE=2 SV=1	3395.46	6329.34	6892.09	5538.97	3.74343	0.338968	3	225	4386.66	5734.34	5925.84	5348.94	3.72827	0.156825	3	243	0.965693	-0.0503628	0.880598
B7Z028;Q9VMD7	16	11	85.3787	0.00294021	2.53162	0.00458765	1.15674	0.996257	Control_Manganese	Experimental_No_Manganese	81674.4	Acyl-coenzyme A oxidase OS=Drosophila melanogaster OX=7227 GN=LCAD PE=1 SV=1	5450.79	5633.31	5462.21	5515.44	3.74158	0.0185374	3	226	4933.49	4605.24	4765.56	4768.1	3.67835	0.0344248	3	284	0.864501	-0.210061	0.00259104
Q9VAJ9	13	8	66.5459	7.1796e-05	4.1439	0.000490084	1.20119	1	Experimental_No_Manganese	Control_Manganese	34847.5	SD09259p OS=Drosophila melanogaster OX=7227 GN=Dmel\CG1907 PE=1 SV=1	5586.32	5396.17	5495.88	5492.79	3.73979	0.0173163	3	227	6629.95	6620.82	6542.8	6597.86	3.8194	0.00725956	3	186	1.20119	0.264459	5.63307e-05
Q24319	10	5	51.4588	0.00385727	2.41372	0.00546298	1.18749	0.99113	Control_Manganese	Experimental_No_Manganese	50094.6	Dolichyl-diphosphooligosaccharide--protein glycosyltransferase 48 kDa subunit OS=Drosophila melanogaster OX=7227 GN=Ost48 PE=2 SV=2	5340.4	5362.62	5770.34	5491.12	3.73966	0.0440828	3	228	4683.75	4687.96	4500.69	4624.13	3.66503	0.0231232	3	291	0.842111	-0.247918	0.00475817
Q9XTL9;A4UZZ4	28	22	138.982	0.0128569	1.89086	0.0124398	1.09219	0.88516	Control_Manganese	Experimental_No_Manganese	97396	Glycogen phosphorylase OS=Drosophila melanogaster OX=7227 GN=GlyP PE=2 SV=2	5632.71	5464.54	5346.95	5481.4	3.73889	0.0262014	3	229	5139.85	5020.06	4896.28	5018.73	3.70059	0.0242673	3	260	0.915593	-0.127221	0.0130995
Q9V496;L0MPS3	106	78	529.733	0.0505817	1.29601	0.0309906	1.03746	0.55366	Experimental_No_Manganese	Control_Manganese	374616	Apolipophorins OS=Drosophila melanogaster OX=7227 GN=apolpp PE=1 SV=2	5484.28	5352.49	5531.44	5456.07	3.73688	0.0169994	3	230	5685.95	5732.28	5563.11	5660.45	3.75285	0.0154439	3	228	1.03746	0.0530547	0.0499492
Q9VSA3	28	21	98.9405	0.00505618	2.29618	0.00654446	1.08223	0.981433	Experimental_No_Manganese	Control_Manganese	46213.7	Probable medium-chain specific acyl-CoA dehydrogenase_ mitochondrial OS=Drosophila melanogaster OX=7227 GN=CG12262 PE=2 SV=1	5498.89	5437.09	5378.58	5438.19	3.73545	0.0110623	3	231	6033.25	5793.41	5829.46	5885.37	3.76977	0.0219747	3	219	1.08223	0.114008	0.00557906
Q9VJ44	10	4	63.4487	0.0119709	1.92187	0.0119068	1.04655	0.896807	Control_Manganese	Experimental_No_Manganese	44474.5	SD06839p OS=Drosophila melanogaster OX=7227 GN=Dmel\CG17597 PE=1 SV=2	5468.46	5414.75	5421.95	5435.05	3.7352	0.00536374	3	232	5219.77	5093.78	5266.4	5193.32	3.71544	0.0171955	3	248	0.955523	-0.0656376	0.0111853
Q7K3J0	16	8	83.7741	0.00233622	2.63149	0.00401544	1.19538	0.998384	Experimental_No_Manganese	Control_Manganese	59832.4	Chaperonin containing TCP1 subunit 8 OS=Drosophila melanogaster OX=7227 GN=CCT8 PE=1 SV=1	5199.13	5584.47	5340.64	5374.75	3.73036	0.0362665	3	233	6232.79	6481.01	6560.79	6424.87	3.80786	0.0266239	3	194	1.19538	0.25747	0.0021763
P48159	10	8	36.5866	0.0017772	2.75026	0.00333989	1.09315	0.999487	Control_Manganese	Experimental_No_Manganese	15050.6	60S ribosomal protein L23 OS=Drosophila melanogaster OX=7227 GN=RpL23 PE=1 SV=2	5354.77	5309.97	5416.86	5360.53	3.72921	0.0100139	3	234	4817.11	4897.65	4996.46	4903.74	3.69053	0.0183185	3	269	0.914785	-0.128495	0.00164014
Q9W2M2;A4UZR3;Q9W2M2-2;Q9W2M2-3	28	21	162.912	0.0178216	1.74905	0.0153106	1.10202	0.822656	Experimental_No_Manganese	Control_Manganese	68031.3	Trehalase OS=Drosophila melanogaster OX=7227 GN=Treh PE=1 SV=1	5555	5266.39	5167.54	5329.64	3.7267	0.0377745	3	235	5996.77	5738.97	5884.38	5873.37	3.76889	0.0220062	3	220	1.10202	0.14015	0.0170107
Q9VKI8	11	10	55.5391	0.0848175	1.07151	0.0446226	1.09983	0.413793	Control_Manganese	Experimental_No_Manganese	35577	GH03305p OS=Drosophila melanogaster OX=7227 GN=Dmel\CG6287 PE=1 SV=1	5663.97	5092.1	5182.22	5312.77	3.72532	0.057875	3	236	4661.72	5070.8	4759.03	4830.52	3.68399	0.0442412	3	273	0.909228	-0.137286	0.0895427
Q9V396	7	7	47.062	0.0017159	2.76551	0.00325599	1.17478	0.999563	Control_Manganese	Experimental_No_Manganese	30351.8	Carbonic anhydrase 1 OS=Drosophila melanogaster OX=7227 GN=CAH1 PE=1 SV=1	5418.71	5280.53	5226.36	5308.53	3.72497	0.018684	3	237	4558.4	4640.42	4357.39	4518.74	3.65502	0.0322273	3	301	0.851222	-0.232393	0.00148341
Q9VCY2	3	2	13.7565	0.000255224	3.59308	0.00105463	1.30863	1	Control_Manganese	Experimental_No_Manganese	33813.1	GH01248p OS=Drosophila melanogaster OX=7227 GN=CG5275 PE=2 SV=2	5450.65	5068.15	5337.49	5285.43	3.72308	0.0371764	3	238	4037.77	4014.08	4064.89	4038.91	3.60626	0.00629519	3	341	0.76416	-0.388054	0.000402655
Q9VSP9	10	6	34.5906	5.55713e-06	5.25515	0.00018102	1.84654	1	Control_Manganese	Experimental_No_Manganese	9279.49	RE05521p OS=Drosophila melanogaster OX=7227 GN=Acbp5 PE=1 SV=1	5161.78	5210.18	5337.88	5236.61	3.71905	0.0173739	3	240	2909.95	2845.87	2751.9	2835.91	3.45269	0.0280306	3	491	0.541553	-0.884824	4.25215e-06
A1ZA47;A0A0B4LGL0;A0A126GUN6;A0A0B4KER6;A0A0B4KEW3;A0A0B4KFR8;A1ZA47-3;A1ZA47-4;A1ZA47-5;A1ZA47-7;C1C3E7;G3JX25;G3JX27;G3JX28;G3JX29;G3JX30;G3JX31;G3JX32	7	3	40.9865	1.19767e-05	4.92166	0.000203548	1.81026	1	Control_Manganese	Experimental_No_Manganese	240402	PDZ and LIM domain protein Zasp OS=Drosophila melanogaster OX=7227 GN=Zasp52 PE=1 SV=2	5154.42	5202.98	5303.8	5220.4	3.7177	0.0145956	3	241	2980.02	2774.84	2896.49	2883.78	3.45996	0.0357783	3	486	0.552406	-0.856199	6.01233e-06
Q9W243	1	1	3.9893	0.00098036	3.00861	0.00230853	1.35183	0.999978	Experimental_No_Manganese	Control_Manganese	64778.8	FI20215p1 OS=Drosophila melanogaster OX=7227 GN=gas PE=1 SV=1	5137.92	4979.14	5491.35	5202.8	3.71624	0.0503951	3	242	6761.96	7143.89	7194.03	7033.29	3.84716	0.0335996	3	167	1.35183	0.434911	0.000850274
Q7K4X4	2	1	8.8756	0.335521	0.47428	0.124789	1.0397	0.136587	Control_Manganese	Experimental_No_Manganese	59332.2	GH24095p OS=Drosophila melanogaster OX=7227 GN=Dmel\CG17230 PE=2 SV=1	5301.08	5396.88	4889.26	5195.74	3.71565	0.051909	3	243	5171.79	4890.82	4929.37	4997.33	3.69874	0.0304798	3	262	0.961812	-0.0561735	0.329416
P24785;P24785-2	7	3	30.8171	0.151719	0.818959	0.068562	1.04758	0.275896	Experimental_No_Manganese	Control_Manganese	145144	Dosage compensation regulator OS=Drosophila melanogaster OX=7227 GN=mle PE=1 SV=2	5266.9	4935.32	5375.45	5192.56	3.71538	0.0441574	3	244	5465.81	5367.09	5486.01	5439.64	3.73557	0.0116976	3	240	1.04758	0.067064	0.146505
Q9Y134	14	7	53.3326	0.0376633	1.42408	0.0257834	1.07145	0.635451	Control_Manganese	Experimental_No_Manganese	119952	L.2.35Df OS=Drosophila melanogaster OX=7227 GN=Mtr4 PE=1 SV=1	5328.98	5090.8	5117.6	5179.13	3.71426	0.0251915	3	245	5002.83	4742.72	4755.7	4833.75	3.68428	0.0303234	3	272	0.933313	-0.0995669	0.0380834
Q9V9M7	6	4	36.831	0.000210863	3.676	0.000920376	1.23268	1	Experimental_No_Manganese	Control_Manganese	18532.8	RE62581p OS=Drosophila melanogaster OX=7227 GN=RpL21 PE=1 SV=1	5271.47	5161.53	5100.73	5177.91	3.71415	0.0167141	3	246	6549.42	6319.16	6279.54	6382.71	3.805	0.0228319	3	197	1.23268	0.301798	0.000250018
Q9W457;B7Z0X1	11	10	52.0766	0.918449	0.0369449	0.255527	1.00286	0.0508441	Control_Manganese	Experimental_No_Manganese	59200.6	Serine hydroxymethyltransferase OS=Drosophila melanogaster OX=7227 GN=Shmt PE=1 SV=1	4985.82	5111.07	5369.04	5155.31	3.71225	0.0379032	3	248	5112.48	5153.11	5156.2	5140.6	3.71101	0.00474642	3	252	0.997145	-0.00412412	0.903259
P45891	7	5	31.6661	0.455635	0.341383	0.155037	1.02635	0.0990009	Experimental_No_Manganese	Control_Manganese	42486.6	Actin-like protein 53D OS=Drosophila melanogaster OX=7227 GN=Arp53D PE=2 SV=2	4821.07	5296.45	5339.96	5152.49	3.71202	0.0558654	3	249	5294.92	5281.27	5288.56	5288.25	3.72331	0.00129162	3	244	1.02635	0.0375194	0.459972
Q9W1G0	15	8	77.249	0.035199	1.45347	0.0247465	1.08201	0.653967	Experimental_No_Manganese	Control_Manganese	36961.8	Probable transaldolase OS=Drosophila melanogaster OX=7227 GN=Taldo PE=2 SV=2	5115.91	4978.14	5358.15	5150.73	3.71187	0.0373509	3	250	5428.48	5618.95	5671.99	5573.14	3.7461	0.0229768	3	233	1.08201	0.113712	0.0339948
M9PGA0	10	5	42.1691	0.542281	0.265776	0.17533	1.08991	0.081726	Control_Manganese	Experimental_No_Manganese	293079	Sickie_ isoform I OS=Drosophila melanogaster OX=7227 GN=sick PE=4 SV=1	4321.46	5472.24	5642.55	5145.42	3.71142	0.139664	3	251	3921.48	4563.37	5677.96	4720.93	3.67403	0.188264	3	287	0.917503	-0.124216	0.555075
Q8MLN4	19	8	80.9114	0.861489	0.0647502	0.243317	1.00509	0.0524594	Control_Manganese	Experimental_No_Manganese	93567.8	Uncharacterized protein_ isoform D OS=Drosophila melanogaster OX=7227 GN=Dmel\CG9380 PE=1 SV=2	5299.79	5068.83	5005.93	5124.85	3.70968	0.0301928	3	252	5310.06	5073.6	4913	5098.88	3.70748	0.0391722	3	256	0.994934	-0.00732797	0.867376
Q9NJH0;A0A0B4JD11;Q7JVZ8	34	30	160.403	0.332121	0.478703	0.123996	1.01926	0.137993	Control_Manganese	Experimental_No_Manganese	49252.7	Elongation factor 1-gamma OS=Drosophila melanogaster OX=7227 GN=eEF1gamma PE=2 SV=2	5201.58	4964.79	5205.23	5123.87	3.7096	0.0268893	3	253	5088.28	5025.73	4967.16	5027.06	3.70131	0.012049	3	259	0.981106	-0.0275197	0.327642
Q9VFV9	6	6	31.0798	0.00547753	2.26142	0.00692922	1.3188	0.977376	Experimental_No_Manganese	Control_Manganese	45914.9	DnaJ-like-2_ isoform A OS=Drosophila melanogaster OX=7227 GN=Droj2 PE=1 SV=1	5356.53	5014.77	4927.01	5099.44	3.70752	0.0445019	3	254	7054.79	6966.71	6153.87	6725.12	3.8277	0.0738542	3	181	1.3188	0.399222	0.00671448
Q95TP0	4	2	18.2934	0.000660528	3.18011	0.00191873	1.09258	0.999999	Control_Manganese	Experimental_No_Manganese	41035.1	LD34582p OS=Drosophila melanogaster OX=7227 GN=TBCC PE=1 SV=1	5106.18	5019.1	5172.68	5099.32	3.70751	0.0151036	3	255	4686.66	4640.28	4674.73	4667.23	3.66906	0.00516018	3	290	0.915264	-0.127739	0.00075174
P81641;A0A0B4LGS0;P08144	17	14	88.2471	0.0158922	1.79882	0.014408	1.14338	0.846259	Control_Manganese	Experimental_No_Manganese	54308	Alpha-amylase B OS=Drosophila melanogaster OX=7227 GN=Amy-d PE=3 SV=3	4800.45	5245.73	5230.69	5092.29	3.70691	0.0496547	3	256	4318.31	4485.54	4557.33	4453.73	3.64872	0.027538	3	304	0.874602	-0.193301	0.0170228
Q8MRM0	19	16	70.6182	0.0216144	1.66526	0.0175289	1.12392	0.779236	Control_Manganese	Experimental_No_Manganese	27633.4	GH16740p OS=Drosophila melanogaster OX=7227 GN=GstT4 PE=1 SV=1	5349.42	4806.87	5120.58	5092.29	3.70691	0.0534882	3	257	4529.12	4581.44	4481.87	4530.81	3.65618	0.0109926	3	299	0.88974	-0.168544	0.0246231
O44424	1	1	4.606	0.344768	0.462473	0.127621	1.06024	0.132882	Control_Manganese	Experimental_No_Manganese	56076.4	Splicing factor ESS-2 homolog OS=Drosophila melanogaster OX=7227 GN=Es2 PE=1 SV=2	5501.05	4739.25	4954.27	5064.85	3.70457	0.077545	3	258	5030.09	4775.02	4526.17	4777.09	3.67916	0.0527447	3	283	0.943185	-0.0843879	0.34564
Q9VHV9	24	20	90.2242	0.00220297	2.65699	0.00384432	1.24411	0.998718	Experimental_No_Manganese	Control_Manganese	59222.4	Uncharacterized protein OS=Drosophila melanogaster OX=7227 GN=Dmel\CG7900 PE=4 SV=3	5253.71	5019.55	4802.71	5025.32	3.70116	0.0448835	3	260	6463.99	6199.33	6092.82	6252.05	3.79602	0.0305686	3	202	1.24411	0.315113	0.00198551
A8DYI7;A8DYI6;Q0E924	11	10	54.1822	0.000256253	3.59133	0.00105463	1.20201	1	Control_Manganese	Experimental_No_Manganese	33550.7	Prohibitin 2_ isoform D OS=Drosophila melanogaster OX=7227 GN=Phb2 PE=1 SV=1	4992.08	4968.22	5100.04	5020.11	3.70071	0.0139919	3	261	4281.14	4142	4106.16	4176.43	3.62081	0.022132	3	327	0.831939	-0.26545	0.000229277
Q9VFQ9	9	6	56.3982	0.000212643	3.67235	0.000920376	1.31734	1	Control_Manganese	Experimental_No_Manganese	56104.4	Dipeptidase B_ isoform A OS=Drosophila melanogaster OX=7227 GN=Dip-B PE=1 SV=2	5137.18	5031.61	4830.42	4999.74	3.69895	0.03117	3	262	3836.12	3708.14	3841.71	3795.32	3.57925	0.0199082	3	371	0.759105	-0.39763	0.000272412
A8DYR4	2	1	9.6938	0.431544	0.364975	0.149413	1.03314	0.10501	Experimental_No_Manganese	Control_Manganese	58725.5	Uncharacterized protein OS=Drosophila melanogaster OX=7227 GN=Dmel\CG34345 PE=4 SV=1	5267.16	4642.2	5062.35	4990.57	3.69815	0.0638414	3	263	5242.86	5169.06	5055.91	5155.94	3.71231	0.0182625	3	250	1.03314	0.0470321	0.437216
O62619;O62619-2	25	20	112.848	0.0439954	1.35659	0.0284727	1.13451	0.592463	Experimental_No_Manganese	Control_Manganese	57953.7	Pyruvate kinase OS=Drosophila melanogaster OX=7227 GN=PyK PE=2 SV=2	5288.13	4891.31	4684	4954.48	3.695	0.0619597	3	264	5831.61	5680.44	5350.59	5620.88	3.7498	0.0437619	3	230	1.13451	0.182063	0.0426337
Q9W237;A0A0B4LG52	20	18	70.7744	0.00697119	2.15669	0.00828265	1.07531	0.961044	Control_Manganese	Experimental_No_Manganese	16888.7	40S ribosomal protein S16 OS=Drosophila melanogaster OX=7227 GN=RpS16 PE=1 SV=1	4880.85	4847.62	5058.88	4929.11	3.69277	0.0230466	3	265	4614.39	4599.94	4537.42	4583.92	3.66124	0.0089252	3	296	0.929967	-0.104748	0.00775069
A0A0B4JCW4;A0A126GUR6;Q95U38;Q9VHJ8	21	17	107.099	0.369668	0.432188	0.134565	1.04523	0.123703	Experimental_No_Manganese	Control_Manganese	49212.2	Succinate--CoA ligase [ADP-forming] subunit beta_ mitochondrial OS=Drosophila melanogaster OX=7227 GN=ScsbetaA PE=1 SV=1	4857.43	4863.58	4987.45	4902.82	3.69045	0.0149625	3	266	4730.88	5199.02	5443.86	5124.59	3.70966	0.0706924	3	255	1.04523	0.0638243	0.357397
P14318	15	13	67.0252	0.795585	0.0993135	0.229512	1.00791	0.0554551	Experimental_No_Manganese	Control_Manganese	20304.2	Muscle-specific protein 20 OS=Drosophila melanogaster OX=7227 GN=Mp20 PE=2 SV=2	4973.31	4917.13	4721.77	4870.73	3.68759	0.0271071	3	267	5131.36	4777.16	4819.2	4909.24	3.69101	0.0394168	3	268	1.00791	0.0113601	0.79001
A1ZAA5;Q7K221	14	11	69.8173	0.129364	0.888188	0.0612196	1.06199	0.310959	Experimental_No_Manganese	Control_Manganese	48921.6	Glutamate oxaloacetate transaminase 1_ isoform B OS=Drosophila melanogaster OX=7227 GN=Got1 PE=1 SV=1	5099.62	4880.79	4578.92	4853.11	3.68602	0.0538729	3	268	5218.78	5094.01	5149.07	5153.95	3.71214	0.0121321	3	251	1.06199	0.086769	0.124616
P54357;M9NEW1	7	7	36.5481	0.00020788	3.68219	0.000920376	1.24733	1	Experimental_No_Manganese	Control_Manganese	16727.5	Myosin-2 essential light chain OS=Drosophila melanogaster OX=7227 GN=Mlc-c PE=1 SV=1	4748.93	4888.66	4902.72	4846.77	3.68545	0.0175426	3	269	6212.73	5952.98	5970.9	6045.54	3.78143	0.0239962	3	213	1.24733	0.318846	0.000247177
Q9VA91;Q8IMI7	18	14	85.3956	0.0209315	1.6792	0.017153	1.14103	0.786757	Experimental_No_Manganese	Control_Manganese	22170	40S ribosomal protein S7 OS=Drosophila melanogaster OX=7227 GN=RpS7 PE=1 SV=1	4797.21	4673.83	5035.95	4835.66	3.68446	0.03807	3	270	5258.06	5499.36	5795.55	5517.66	3.74175	0.0487905	3	236	1.14103	0.190342	0.0223183
P33438;M9NCS8	3	3	14.1308	0.84732	0.0719526	0.240183	1.00309	0.0529982	Control_Manganese	Experimental_No_Manganese	119034	Glutactin OS=Drosophila melanogaster OX=7227 GN=Glt PE=1 SV=2	4843.33	4746.15	4811.95	4800.48	3.68128	0.0103316	3	272	4697.53	4733.31	4926.24	4785.69	3.67994	0.0257064	3	279	0.99692	-0.00445001	0.856325
P41093	8	7	40.3912	0.0787343	1.10384	0.0424506	1.07205	0.433206	Control_Manganese	Experimental_No_Manganese	21086.7	60S ribosomal protein L18a OS=Drosophila melanogaster OX=7227 GN=RpL18A PE=1 SV=1	4600.4	4972.55	4787.33	4786.76	3.68004	0.0388726	3	273	4311.46	4475.72	4608	4465.06	3.64983	0.033271	3	302	0.932794	-0.10037	0.079363
Q9VKX8	1	1	4.8387	0.227609	0.64281	0.0929686	1.08949	0.197204	Control_Manganese	Experimental_No_Manganese	42522.4	Defective proboscis extension response 19_ isoform A OS=Drosophila melanogaster OX=7227 GN=dpr19 PE=1 SV=2	5283	4429.31	4644.67	4785.66	3.67994	0.0927691	3	274	4390.51	4590.99	4196.21	4392.57	3.64272	0.044939	3	308	0.91786	-0.123654	0.233735
Q8MRT7	2	2	8.5485	0.00111592	2.95237	0.00255091	1.14982	0.999953	Control_Manganese	Experimental_No_Manganese	20341.9	SD26038p OS=Drosophila melanogaster OX=7227 GN=BcDNA:SD26038 PE=1 SV=1	4681.69	4767.31	4863.93	4770.98	3.67861	0.0191105	3	275	4083.31	4112.14	4252.51	4149.32	3.61798	0.021816	3	330	0.869699	-0.201412	0.00110891
P09180	32	24	117.273	0.0783375	1.10603	0.042295	1.03507	0.434536	Experimental_No_Manganese	Control_Manganese	45139.9	60S ribosomal protein L4 OS=Drosophila melanogaster OX=7227 GN=RpL4 PE=1 SV=2	4668.07	4792.91	4809.67	4756.88	3.67732	0.0162647	3	276	4881.78	4855.85	5033.5	4923.71	3.69229	0.0194889	3	266	1.03507	0.04973	0.0790121
Q9VB28	5	1	22.5956	0.737108	0.132469	0.217621	1.01212	0.0592282	Experimental_No_Manganese	Control_Manganese	53350.7	Uncharacterized protein OS=Drosophila melanogaster OX=7227 GN=Dmel\CG13972 PE=4 SV=1	4592.08	4686.71	4986.71	4755.17	3.67717	0.0433278	3	277	4924.74	4918.48	4595.13	4812.79	3.6824	0.0391708	3	276	1.01212	0.0173756	0.738886
O97125	24	12	70.6528	0.0494912	1.30547	0.0305609	1.08501	0.55972	Experimental_No_Manganese	Control_Manganese	70085.9	Heat shock protein 68 OS=Drosophila melanogaster OX=7227 GN=Hsp68 PE=1 SV=1	4847.55	4688.09	4668.26	4734.64	3.67529	0.0207598	3	278	5114.72	4912.55	5384.14	5137.14	3.71072	0.0460557	3	254	1.08501	0.117711	0.0529243
Q7KN62;A0A0B4LFZ4;Q7KN62-3;Q7KN62-2	28	21	131.544	0.642908	0.191851	0.197414	1.01524	0.0679027	Experimental_No_Manganese	Control_Manganese	89600.9	Transitional endoplasmic reticulum ATPase TER94 OS=Drosophila melanogaster OX=7227 GN=TER94 PE=1 SV=1	4923.68	4707.77	4508.76	4713.4	3.67333	0.0440276	3	279	4868.28	4618.77	4868.63	4785.23	3.6799	0.0301246	3	280	1.01524	0.0218178	0.648283
Q8T8W3;Q8T6I0	26	20	118.945	0.162631	0.788797	0.07257	1.01699	0.261332	Experimental_No_Manganese	Control_Manganese	61752	AT21416p OS=Drosophila melanogaster OX=7227 GN=Past1 PE=1 SV=1	4634.43	4712.23	4777.61	4708.09	3.67284	0.0152249	3	280	4816.56	4802	4745.68	4788.08	3.68016	0.00781821	3	278	1.01699	0.024305	0.161823
M9PF96;Q9VWC8	7	5	34.2505	0.00025631	3.59124	0.00105463	1.10034	1	Control_Manganese	Experimental_No_Manganese	73227.4	Peroxisomal membrane protein 70 kDa_ isoform C OS=Drosophila melanogaster OX=7227 GN=Pmp70 PE=1 SV=1	4635.45	4718.47	4656.65	4670.19	3.66933	0.00923608	3	281	4213.35	4227.24	4292.37	4244.32	3.62781	0.00993911	3	320	0.908812	-0.137947	0.000256991
A0A0B4KGI0;Q9VDT3;Q5BI72	32	19	168.704	3.79335e-05	4.42098	0.00040248	1.12862	1	Control_Manganese	Experimental_No_Manganese	158497	Uncharacterized protein_ isoform E OS=Drosophila melanogaster OX=7227 GN=CT14766 PE=4 SV=1	4636.25	4710.39	4625.32	4657.32	3.66814	0.00993812	3	282	4118.3	4117.61	4143.81	4126.58	3.61559	0.00361803	3	333	0.886041	-0.174554	4.61378e-05
Q9VA23	6	2	24.8077	0.0599922	1.2219	0.03473	1.11973	0.506462	Experimental_No_Manganese	Control_Manganese	95494.2	FI22211p1 OS=Drosophila melanogaster OX=7227 GN=Dmel\CG15548 PE=2 SV=2	4838.53	4402.52	4659.12	4633.39	3.6659	0.0472959	3	283	5064.44	5536.18	4963.81	5188.14	3.71501	0.0588993	3	249	1.11973	0.163151	0.0629529
Q94511;A4V449	25	18	124.022	0.0503428	1.29806	0.0308927	1.21073	0.554976	Control_Manganese	Experimental_No_Manganese	79542.9	NADH-ubiquinone oxidoreductase 75 kDa subunit_ mitochondrial OS=Drosophila melanogaster OX=7227 GN=ND-75 PE=2 SV=3	4756.06	4902.76	4231.01	4629.94	3.66558	0.0762838	3	284	3435.05	3967.78	4069.44	3824.09	3.58253	0.0891012	3	366	0.825947	-0.275879	0.0466707
Q9VRS7	4	1	34.848	0.0114877	1.93977	0.0116333	1.09812	0.903187	Control_Manganese	Experimental_No_Manganese	28856.3	GH01508p OS=Drosophila melanogaster OX=7227 GN=Jon65Aiii PE=2 SV=1	4656.45	4589.43	4541.94	4595.94	3.66237	0.0125178	3	285	4273.31	4262.65	4019.86	4185.27	3.62172	0.034252	3	326	0.910645	-0.135039	0.00999422
P35415;A4V1N8;A4V1N9;P35416	36	27	184.005	0.217919	0.661704	0.0898558	1.03157	0.2049	Control_Manganese	Experimental_No_Manganese	102452	Paramyosin_ long form OS=Drosophila melanogaster OX=7227 GN=Prm PE=1 SV=1	4509.53	4501.25	4629.94	4546.91	3.65772	0.0158413	3	286	4264.39	4397.55	4561.34	4407.76	3.64422	0.0337441	3	306	0.969398	-0.0448397	0.21849
A2RVG6;M9PCH6;Q29R16;Q9VUH1	3	2	13.82	0.00162876	2.78814	0.00316399	1.24593	0.999657	Control_Manganese	Experimental_No_Manganese	117330	IP17501p OS=Drosophila melanogaster OX=7227 GN=ome PE=1 SV=1	4467.31	4459.44	4682.16	4536.3	3.6567	0.0278597	3	288	3467.39	3746.63	3708.67	3640.9	3.56121	0.0415989	3	393	0.802613	-0.317223	0.00141427
Q9VLB7	24	19	156.157	0.0287828	1.54087	0.0214714	1.1243	0.707762	Experimental_No_Manganese	Control_Manganese	50245.2	Rab GDP dissociation inhibitor OS=Drosophila melanogaster OX=7227 GN=Gdi PE=1 SV=1	4799.86	4323.99	4474.85	4532.9	3.65638	0.0536494	3	289	5261.21	5069.11	4958.69	5096.34	3.70726	0.030038	3	257	1.1243	0.169027	0.0273748
Q9V9U9	3	1	18.6893	0.207066	0.68389	0.0868023	1.06161	0.214168	Control_Manganese	Experimental_No_Manganese	24753.7	MIP13505p1 OS=Drosophila melanogaster OX=7227 GN=Dmel\CG11563 PE=1 SV=2	4271.7	4590.3	4660.1	4507.37	3.65392	0.0459373	3	290	4171.24	4073.69	4492.37	4245.77	3.62796	0.0515956	3	319	0.941961	-0.08626	0.20722
Q9VJG0	11	7	53.4768	0.224774	0.648255	0.0920026	1.03908	0.199403	Control_Manganese	Experimental_No_Manganese	68905.2	Xaa-Pro aminopeptidase ApepP OS=Drosophila melanogaster OX=7227 GN=ApepP PE=1 SV=1	4371.58	4458.51	4656.99	4495.69	3.6528	0.0325407	3	291	4466.73	4180.68	4332.39	4326.6	3.63615	0.0330778	3	314	0.962389	-0.0553084	0.225663
Q9V4N3;Q9V4N3-2	6	6	31.5897	0.387629	0.411584	0.138249	1.05061	0.117726	Control_Manganese	Experimental_No_Manganese	15263	Cytochrome b5 OS=Drosophila melanogaster OX=7227 GN=Cyt-b5 PE=2 SV=1	4567.74	4167.39	4717.67	4484.27	3.65169	0.063439	3	292	3999.25	4300.46	4505.02	4268.24	3.63025	0.0596079	3	317	0.951825	-0.0712313	0.382397
Q9W0J9;Q8SXQ8	12	7	59.7572	0.564742	0.24815	0.18065	1.01067	0.0781453	Experimental_No_Manganese	Control_Manganese	35888.7	GH07301p OS=Drosophila melanogaster OX=7227 GN=Dmel\CG9119 PE=1 SV=1	4352.43	4529.08	4534.22	4471.91	3.65049	0.0231458	3	293	4433.07	4530.41	4595.35	4519.61	3.6551	0.0180721	3	300	1.01067	0.0153068	0.564911
O46067	18	11	100.556	0.50044	0.300648	0.165919	1.02951	0.0893133	Experimental_No_Manganese	Control_Manganese	103731	EG:25E8.1 protein OS=Drosophila melanogaster OX=7227 GN=EG:25E8.1 PE=1 SV=1	4414.9	4359.65	4617.53	4464.03	3.64973	0.0304153	3	294	4324.59	4864.05	4598.63	4595.76	3.66236	0.0586927	3	294	1.02951	0.0419571	0.491966
Q9W414	12	7	64.8657	0.000847295	3.07197	0.00214389	1.16182	0.999992	Control_Manganese	Experimental_No_Manganese	45139.3	Regulatory particle triple-A ATPase 4 OS=Drosophila melanogaster OX=7227 GN=Rpt4 PE=1 SV=3	4570.28	4436.83	4354.15	4453.75	3.64873	0.0244859	3	295	3858.27	3766.3	3875.73	3833.43	3.58359	0.0153367	3	363	0.86072	-0.216385	0.000972905
Q9W3J1	5	2	23.9135	5.96772e-05	4.22419	0.000490084	1.48654	1	Experimental_No_Manganese	Control_Manganese	39981.5	Gbeta5 OS=Drosophila melanogaster OX=7227 GN=Gbeta5 PE=2 SV=1	4592.41	4307.53	4415.74	4438.56	3.64724	0.032399	3	297	6738.01	6601.63	6454.68	6598.11	3.81942	0.0214751	3	185	1.48654	0.57196	4.99441e-05
Q9Y0Z0	5	2	26.8818	0.00987022	2.00567	0.0105415	1.10732	0.924521	Control_Manganese	Experimental_No_Manganese	58556.4	LD24639p OS=Drosophila melanogaster OX=7227 GN=mmy PE=1 SV=1	4313.96	4455.2	4544.64	4437.93	3.64718	0.0262067	3	298	3881.01	4060.97	4081.47	4007.82	3.60291	0.0275197	3	346	0.903083	-0.14707	0.00967723
Q7KLX3	11	8	42.6458	0.00388711	2.41037	0.00546563	1.15394	0.990927	Control_Manganese	Experimental_No_Manganese	17886.3	GEO05407p1 OS=Drosophila melanogaster OX=7227 GN=Tapdelta PE=1 SV=1	4418.44	4284.7	4368.75	4357.3	3.63922	0.0155147	3	299	3945.03	3681.79	3701.21	3776.01	3.57703	0.0388507	3	376	0.866595	-0.206571	0.00337486
A1Z6L9	14	9	80.0613	0.0387892	1.41129	0.0263695	1.11301	0.627344	Control_Manganese	Experimental_No_Manganese	78248.3	FI21274p1 OS=Drosophila melanogaster OX=7227 GN=Trap1 PE=1 SV=1	4603.53	4260.52	4190.42	4351.49	3.63864	0.0508021	3	300	4060.21	3795.4	3873.35	3909.65	3.59214	0.0348082	3	356	0.898463	-0.154469	0.0420532
Q94523	23	15	101.01	0.0236368	1.62641	0.0185904	1.12109	0.757716	Experimental_No_Manganese	Control_Manganese	72913.4	Succinate dehydrogenase [ubiquinone] flavoprotein subunit_ mitochondrial OS=Drosophila melanogaster OX=7227 GN=SdhA PE=2 SV=3	4543.06	4244.23	4254.09	4347.13	3.6382	0.0390499	3	301	4705.89	5089.54	4825.11	4873.51	3.68784	0.0402894	3	271	1.12109	0.1649	0.0246135
A8QI34	5	2	21.5106	0.0126925	1.89645	0.0123418	1.09781	0.887315	Experimental_No_Manganese	Control_Manganese	113257	Sodium/potassium-transporting ATPase subunit alpha OS=Drosophila melanogaster OX=7227 GN=JYalpha PE=3 SV=2	4158.35	4386.22	4472.04	4338.87	3.63738	0.0373645	3	303	4747.64	4780.22	4761.95	4763.27	3.67791	0.00342888	3	285	1.09781	0.134633	0.0107289
Q94518;A0A0B4LEY6	12	8	42.0205	0.811311	0.0908126	0.232504	1.01702	0.0546248	Experimental_No_Manganese	Control_Manganese	23020.8	Nascent polypeptide-associated complex subunit alpha OS=Drosophila melanogaster OX=7227 GN=Nacalpha PE=1 SV=2	4863.01	4064.5	4065.72	4331.08	3.6366	0.106364	3	304	4781.13	4265.76	4167.43	4404.77	3.64392	0.0748331	3	307	1.01702	0.0243414	0.832762
Q9VMX4	4	2	25.6624	0.00018392	3.73537	0.000908718	1.3321	1	Control_Manganese	Experimental_No_Manganese	28460.5	AT19154p OS=Drosophila melanogaster OX=7227 GN=Scox PE=1 SV=1	4137.84	4416.34	4393.4	4315.86	3.63507	0.0358211	3	305	3243.11	3210	3266.6	3239.9	3.51053	0.00877704	3	445	0.750696	-0.413699	0.00028982
Q9V597	8	7	26.98	0.00122261	2.91271	0.00263495	1.08135	0.999921	Control_Manganese	Experimental_No_Manganese	14589.7	60S ribosomal protein L31 OS=Drosophila melanogaster OX=7227 GN=RpL31 PE=1 SV=1	4311.82	4285.99	4300.89	4299.56	3.63342	0.0030162	3	306	3921.01	4047.93	3959.4	3976.11	3.59946	0.0163709	3	348	0.924771	-0.112832	0.001079
Q7KSQ0	22	19	102	0.498411	0.302412	0.165527	1.01294	0.0897146	Experimental_No_Manganese	Control_Manganese	34435.8	LD46175p OS=Drosophila melanogaster OX=7227 GN=sea PE=1 SV=1	4344.04	4184.1	4325.05	4284.39	3.63189	0.020394	3	307	4328.42	4251.47	4439.57	4339.82	3.63747	0.0217906	3	312	1.01294	0.0185443	0.497325
Q7K3P6	12	9	49.8727	0.000928966	3.032	0.00224152	1.23233	0.999985	Experimental_No_Manganese	Control_Manganese	50670.7	GH21490p OS=Drosophila melanogaster OX=7227 GN=Dmel\CG6484 PE=1 SV=1	4311.87	4391.65	4095.42	4266.32	3.63005	0.0359276	3	308	5180.91	5376.95	5214.69	5257.52	3.72078	0.0199334	3	246	1.23233	0.301391	0.000760673
Q9VBH8;Q9VHE5	3	2	11.1775	0.0195451	1.70896	0.0162554	1.02258	0.802427	Control_Manganese	Experimental_No_Manganese	18296.9	FI02850p OS=Drosophila melanogaster OX=7227 GN=RpL34a PE=1 SV=2	4235.61	4236.66	4182.26	4218.18	3.62512	0.00737596	3	309	4091.5	4144.9	4138.74	4125.05	3.61543	0.00708228	3	334	0.977922	-0.0322084	0.0194458
Q9VZF5	5	3	21.0198	0.127458	0.894632	0.0606968	1.076	0.314335	Control_Manganese	Experimental_No_Manganese	101181	Kinesin-like protein OS=Drosophila melanogaster OX=7227 GN=pav PE=1 SV=1	4022.04	4445.55	4186.18	4217.92	3.6251	0.050626	3	310	3803.32	4113	3843.64	3919.99	3.59328	0.0429497	3	355	0.929364	-0.105684	0.13058
Q24278	2	1	9.7033	0.0146814	1.83323	0.0136153	1.18343	0.861547	Experimental_No_Manganese	Control_Manganese	76450.8	Cyclic nucleotide-gated cation channel subunit A OS=Drosophila melanogaster OX=7227 GN=CngA PE=2 SV=2	4418.54	3978.9	4254.84	4217.43	3.62505	0.052684	3	311	4741.3	5204.74	5027.01	4991.02	3.69819	0.0468457	3	263	1.18343	0.242972	0.0142121
P06742;A0A0B4LHS1;P06742-2	11	10	38.1177	0.0871951	1.05951	0.0454453	1.09568	0.406666	Experimental_No_Manganese	Control_Manganese	17695	Myosin light chain alkali OS=Drosophila melanogaster OX=7227 GN=Mlc1 PE=1 SV=4	4528.39	3955.68	4156.91	4213.66	3.62466	0.0689527	3	312	4719.81	4592.33	4538.32	4616.82	3.66434	0.020184	3	293	1.09568	0.131826	0.0839885
Q9VAY2	31	20	167.705	0.366298	0.436165	0.134067	1.04317	0.124882	Control_Manganese	Experimental_No_Manganese	90352.9	Glycoprotein 93 OS=Drosophila melanogaster OX=7227 GN=Gp93 PE=1 SV=1	4493.97	4068.8	4035.44	4199.4	3.62319	0.0608768	3	314	3856.52	4139.94	4080.39	4025.62	3.60483	0.0371224	3	343	0.958616	-0.060975	0.366872
Q9W141;Q9W141-2	11	9	43.117	0.056135	1.25077	0.0333985	1.034	0.524776	Control_Manganese	Experimental_No_Manganese	12483.4	Putative ATP synthase subunit f_ mitochondrial OS=Drosophila melanogaster OX=7227 GN=CG4692 PE=3 SV=1	4130.59	4172.37	4185.22	4162.72	3.61938	0.00686156	3	315	4121.2	3963.95	3992.43	4025.86	3.60486	0.0208116	3	342	0.967121	-0.0482316	0.0553407
Q7JV69	14	10	90.1849	0.414467	0.38251	0.144654	1.00585	0.109663	Control_Manganese	Experimental_No_Manganese	42262.3	SD11922p OS=Drosophila melanogaster OX=7227 GN=Spn55B PE=1 SV=1	4144.38	4150.02	4171.29	4155.23	3.6186	0.00341467	3	316	4082.21	4166.84	4144.19	4131.08	3.61606	0.0106058	3	331	0.994188	-0.00840956	0.415098
Q8IPB7;Q9VKV1	17	13	92.9385	0.00268509	2.57104	0.00441002	1.15903	0.997279	Experimental_No_Manganese	Control_Manganese	123421	Alpha-mannosidase OS=Drosophila melanogaster OX=7227 GN=LManII PE=1 SV=1	4336.68	4049.54	4076.59	4154.27	3.61849	0.0381644	3	317	4852.34	4819.49	4772.95	4814.92	3.68259	0.00828451	3	275	1.15903	0.212918	0.00219298
Q9VKM3	6	4	22.5003	0.125937	0.899848	0.0603282	1.03957	0.317082	Control_Manganese	Experimental_No_Manganese	10928.8	ATP synthase subunit OS=Drosophila melanogaster OX=7227 GN=ATPsynG PE=1 SV=1	4105.03	4011.51	4270.51	4129.02	3.61585	0.031764	3	318	4036.1	3944.34	3935.08	3971.84	3.59899	0.0140601	3	349	0.961934	-0.0559909	0.128775
E1JIZ5;E1JIZ4;Q9VB69	23	19	104.183	0.000315639	3.50081	0.00122159	1.38436	1	Experimental_No_Manganese	Control_Manganese	69856.5	Malic enzyme OS=Drosophila melanogaster OX=7227 GN=Men-b PE=1 SV=1	4266.55	3943.92	4161.85	4124.11	3.61533	0.0399099	3	319	5865.21	5709.35	5553.16	5709.24	3.75658	0.0273282	3	225	1.38436	0.469217	0.000267081
Q01604;M9PCE0	19	17	103.69	0.137555	0.861523	0.0637833	1.0596	0.297189	Experimental_No_Manganese	Control_Manganese	44147	Phosphoglycerate kinase OS=Drosophila melanogaster OX=7227 GN=Pgk PE=2 SV=2	3957.56	4346.72	4055.52	4119.93	3.61489	0.049131	3	321	4475.37	4363.46	4257.65	4365.49	3.64003	0.0249403	3	311	1.0596	0.0835242	0.137906
Q9VBU9	6	3	24.7293	0.0578545	1.23766	0.0340586	1.07312	0.516447	Experimental_No_Manganese	Control_Manganese	9706.28	40S ribosomal protein S27 OS=Drosophila melanogaster OX=7227 GN=RpS27 PE=1 SV=1	4089.06	3948.99	4312.68	4116.91	3.61457	0.0445578	3	322	4452.22	4458.57	4342.99	4417.93	3.64522	0.0147064	3	305	1.07312	0.101808	0.0552779
P41572;M9PIS3	19	13	95.7071	0.917403	0.0374399	0.255418	1.00178	0.050866	Experimental_No_Manganese	Control_Manganese	53004.4	6-phosphogluconate dehydrogenase_ decarboxylating OS=Drosophila melanogaster OX=7227 GN=Pgd PE=2 SV=1	4169.63	3948.51	4187.77	4101.97	3.61299	0.032474	3	323	4088.97	4101.7	4137.18	4109.29	3.61377	0.00607879	3	336	1.00178	0.00257032	0.930017
M9PI17;Q8IQF8;Q9VTK9	21	5	160.804	0.0413417	1.38361	0.0275701	1.13644	0.60973	Control_Manganese	Experimental_No_Manganese	36180.5	Uncharacterized protein_ isoform D OS=Drosophila melanogaster OX=7227 GN=ESTS:34F4T PE=1 SV=1	4439.32	3895.35	3953.62	4096.09	3.61237	0.0729151	3	324	3644.53	3637.92	3530.49	3604.31	3.55682	0.0177613	3	399	0.87994	-0.184524	0.0493816
Q7KTC7;Q7KTC1;Q7KTC3;Q7KTC8;Q7KTD0;Q9I7N0;A0A0S0WIA2;Q7KTB7;Q7KTB8;Q7KTB9;Q7KTC0;Q7KTC2;Q7KTC4;Q7KTC5;Q7KTC6;Q7KTC9;Q9VK56	29	22	144.593	0.098583	1.0062	0.0499319	1.04914	0.375636	Experimental_No_Manganese	Control_Manganese	173975	Multidrug-Resistance like protein 1_ isoform C OS=Drosophila melanogaster OX=7227 GN=MRP PE=1 SV=1	4233.47	4014.11	3991.67	4079.75	3.61063	0.0327472	3	326	4273.76	4191.74	4375.2	4280.24	3.63147	0.0214707	3	316	1.04914	0.0692092	0.0989263
Q9VBN5	4	3	27.8158	0.156946	0.80425	0.0703545	1.08165	0.268739	Experimental_No_Manganese	Control_Manganese	15903	60S ribosomal protein L27 OS=Drosophila melanogaster OX=7227 GN=RpL27 PE=1 SV=1	4218.88	3736.48	4222.72	4059.36	3.60846	0.0688856	3	327	4242.37	4367.5	4562.54	4390.8	3.64254	0.0367484	3	309	1.08165	0.113233	0.150001
Q9VBS6	25	20	120.881	0.197594	0.704227	0.0836816	1.03077	0.222881	Control_Manganese	Experimental_No_Manganese	47809.8	Uncharacterized protein_ isoform A OS=Drosophila melanogaster OX=7227 GN=CG10551 PE=1 SV=2	4161.5	3917.25	3994.41	4024.39	3.6047	0.031025	3	329	3843.63	3939.05	3930.13	3904.27	3.59154	0.0135001	3	357	0.970152	-0.0437171	0.199541
Q8MLU9	7	6	37.3338	0.767979	0.114651	0.224196	1.00296	0.0570977	Experimental_No_Manganese	Control_Manganese	340474	Uncharacterized protein OS=Drosophila melanogaster OX=7227 GN=Dmel\CG13492 PE=4 SV=3	3959.92	4027.37	4013.33	4000.21	3.60208	0.00889607	3	330	3981.91	4073.91	3980.29	4012.04	3.60336	0.0133579	3	345	1.00296	0.00425988	0.766055
Q9W4U2	11	9	53.6018	0.295776	0.529037	0.113908	1.04813	0.154697	Control_Manganese	Experimental_No_Manganese	26384.3	RH09070p OS=Drosophila melanogaster OX=7227 GN=Dmel\CG3603 PE=1 SV=2	3778.53	4013.13	4204.46	3998.71	3.60192	0.05335	3	331	3969.79	3660.58	3814.9	3815.09	3.5815	0.0405251	3	369	0.954081	-0.0678167	0.293883
P55935;C6SUW3;Q95RG1	24	15	100.33	0.0233659	1.63142	0.0185064	1.14393	0.760533	Experimental_No_Manganese	Control_Manganese	22623.5	40S ribosomal protein S9 OS=Drosophila melanogaster OX=7227 GN=RpS9 PE=1 SV=2	3786.15	3913.52	4279.21	3992.96	3.60129	0.0641003	3	332	4574.78	4645.96	4482.25	4567.66	3.65969	0.0179713	3	297	1.14393	0.193998	0.020775
Q9Y0Y2	10	9	46.1	0.0986137	1.00606	0.0499319	1.05429	0.375559	Control_Manganese	Experimental_No_Manganese	49357.1	Adenylosuccinate synthetase OS=Drosophila melanogaster OX=7227 GN=AdSS PE=2 SV=1	3905.24	3926.29	4111.59	3981.04	3.6	0.0285223	3	334	3772.69	3898.76	3656.67	3776.04	3.57704	0.0320652	3	375	0.948506	-0.0762709	0.099192
E2QCF1;A0A0B4LFH8;Q7KN85	30	16	162.041	0.991167	0.00385297	0.27037	1.00018	0.0500098	Experimental_No_Manganese	Control_Manganese	120775	ATP-citrate synthase OS=Drosophila melanogaster OX=7227 GN=ATPCL PE=1 SV=1	4032.9	3982.57	3915.44	3976.97	3.59955	0.0148181	3	335	4159.14	3846.04	3927.91	3977.7	3.59963	0.0408213	3	347	1.00018	0.000264092	0.994525
O16797	9	7	48.624	0.0175661	1.75532	0.0151578	1.24009	0.825724	Experimental_No_Manganese	Control_Manganese	47315.1	60S ribosomal protein L3 OS=Drosophila melanogaster OX=7227 GN=RpL3 PE=1 SV=3	4123.29	3571.4	4234.82	3976.5	3.5995	0.0893338	3	336	4777.4	5081.02	4935.19	4931.2	3.69295	0.0307938	3	265	1.24009	0.31044	0.0128451
M9PGK7;Q7YU15;Q9W0Q4;M9PBH0;M9PDJ0	7	4	25.6602	0.000184719	3.73349	0.000908718	1.2697	1	Control_Manganese	Experimental_No_Manganese	248215	Klarsicht_ isoform E OS=Drosophila melanogaster OX=7227 GN=klar PE=1 SV=1	3924.71	3941.74	4042.71	3969.72	3.59876	0.0160667	3	337	3191.86	3154.4	3033.21	3126.49	3.49506	0.026523	3	457	0.787585	-0.344493	0.000152683
Q9V3G1	11	11	40.0491	0.00136722	2.86416	0.00279809	1.35902	0.999856	Experimental_No_Manganese	Control_Manganese	28006.6	60S ribosomal protein L8 OS=Drosophila melanogaster OX=7227 GN=RpL8 PE=1 SV=1	3935.85	3794.59	4172.77	3967.74	3.59854	0.048162	3	338	5105.22	5521.27	5550.15	5392.21	3.73177	0.0461712	3	241	1.35902	0.442562	0.00141484
Q9Y112	13	10	71.1441	0.23122	0.635974	0.0939486	1.04423	0.194464	Control_Manganese	Experimental_No_Manganese	36711.7	BcDNA.GH10614 OS=Drosophila melanogaster OX=7227 GN=AKR2E3 PE=1 SV=1	4185.7	3881.85	3825.3	3964.28	3.59816	0.0488923	3	339	3852.41	3827.1	3709.58	3796.36	3.57937	0.0200749	3	370	0.957642	-0.0624414	0.235076
Q9VDC0	11	7	59.352	0.000416946	3.37992	0.00150909	1.30531	1	Experimental_No_Manganese	Control_Manganese	27521.6	GH01837p OS=Drosophila melanogaster OX=7227 GN=FOHSDR PE=1 SV=1	4066.99	3809.88	3935.55	3937.47	3.59522	0.032651	3	341	5135.21	5000.01	5283.61	5139.61	3.71093	0.0275994	3	253	1.30531	0.384388	0.00040565
P41043;A4UZL5;A0A0B4KFT5	10	7	64.656	0.0121649	1.91489	0.0119778	1.07194	0.89425	Control_Manganese	Experimental_No_Manganese	27670.6	Glutathione S-transferase S1 OS=Drosophila melanogaster OX=7227 GN=GstS1 PE=1 SV=2	3934.96	3991.78	3798.73	3908.49	3.59201	0.0253834	3	342	3660.72	3602.8	3675.06	3646.2	3.56184	0.010493	3	392	0.932892	-0.100219	0.0129246
Q9VK57	5	3	21.4769	0.000110903	3.95506	0.000647036	1.61838	1	Experimental_No_Manganese	Control_Manganese	38192.2	LD15349p OS=Drosophila melanogaster OX=7227 GN=Pih1D1 PE=1 SV=1	3984.63	3815.66	3910.62	3903.64	3.59147	0.0216989	3	343	6647.82	6009.66	6295.21	6317.56	3.80055	0.0506002	3	198	1.61838	0.694549	0.000225352
Q9VZU7	11	6	49.8465	2.11521e-06	5.67465	0.000118117	2.09057	1	Experimental_No_Manganese	Control_Manganese	92947.5	Ubiquitin carboxyl-terminal hydrolase OS=Drosophila melanogaster OX=7227 GN=Usp5 PE=1 SV=1	3948.11	3982.87	3762.3	3897.76	3.59082	0.0304263	3	344	8176.88	8171.77	8096.95	8148.53	3.91108	0.00549136	3	136	2.09057	1.0639	5.26069e-07
A0A0B4K7L3;A0A0B4K6W0;A0A0B4KEH7;A0A0B4KEJ6;A1Z867;B7YZD8;B7YZD9	18	9	69.3255	0.0192189	1.71627	0.0161058	1.10593	0.806192	Experimental_No_Manganese	Control_Manganese	283359	CAP_ isoform X OS=Drosophila melanogaster OX=7227 GN=CAP PE=4 SV=1	4068.07	3721.77	3899.35	3896.4	3.59066	0.0444425	3	345	4370.27	4291.56	4265.59	4309.14	3.63439	0.0126502	3	315	1.10593	0.14526	0.01699
Q9VM18	10	8	45.9875	0.0330857	1.48036	0.0236435	1.08002	0.670748	Experimental_No_Manganese	Control_Manganese	31310.2	Trehalose 6-phosphate phosphatase OS=Drosophila melanogaster OX=7227 GN=Dmel\CG5177 PE=1 SV=1	3956.39	3721.73	4001.69	3893.27	3.59031	0.0385984	3	346	4157.1	4279.36	4177.92	4204.79	3.62374	0.0155566	3	323	1.08002	0.111052	0.0301527
Q9VTP4	16	12	60.203	0.0852064	1.06953	0.0447069	1.0586	0.41261	Control_Manganese	Experimental_No_Manganese	24444.8	60S ribosomal protein L10a-2 OS=Drosophila melanogaster OX=7227 GN=RpL10Ab PE=1 SV=2	3841.55	3730.74	4050.21	3874.17	3.58818	0.0418704	3	349	3696.96	3661.51	3620.68	3659.72	3.56345	0.0104298	3	386	0.944646	-0.0821539	0.0897166
Q961R8;Q9VUK8	12	11	76.6937	0.00526108	2.27892	0.0067427	1.17396	0.979497	Experimental_No_Manganese	Control_Manganese	76602.5	GH09263p OS=Drosophila melanogaster OX=7227 GN=GlyRS PE=1 SV=1	4052.76	3819.47	3748.8	3873.68	3.58812	0.041064	3	350	4704.88	4463.38	4474.38	4547.55	3.65778	0.029987	3	298	1.17396	0.231385	0.00508781
P80455	6	6	13.3074	0.110405	0.957011	0.0546287	1.05611	0.347967	Control_Manganese	Experimental_No_Manganese	15510.8	40S ribosomal protein S12 OS=Drosophila melanogaster OX=7227 GN=RpS12 PE=1 SV=2	3977.28	3777.41	3716.38	3823.69	3.58248	0.0356898	3	352	3704.84	3501.01	3655.73	3620.53	3.55877	0.0293815	3	396	0.946868	-0.0787648	0.111746
Q9VGJ8	18	11	88.0917	0.00193208	2.71398	0.00351273	1.16771	0.999258	Control_Manganese	Experimental_No_Manganese	102170	RE03989p OS=Drosophila melanogaster OX=7227 GN=Dmel\CG6830 PE=1 SV=1	3908.16	3735.62	3803.41	3815.73	3.58158	0.0227814	3	353	3364.63	3265.65	3172.83	3267.71	3.51424	0.0293527	3	442	0.856378	-0.22368	0.00184101
Q9VBI2	12	10	52.7463	0.16312	0.787493	0.0727053	1.03479	0.260712	Control_Manganese	Experimental_No_Manganese	28164.7	UMP-CMP kinase OS=Drosophila melanogaster OX=7227 GN=Dak1 PE=1 SV=1	3774.47	3759.59	3909.76	3814.61	3.58145	0.0216905	3	354	3801.56	3646.85	3610.7	3686.37	3.5666	0.0275018	3	385	0.966382	-0.049335	0.16486
Q9VLL3;Q86BM5;Q9VLL3-2	3	1	14.0605	0.0108026	1.96647	0.0111796	1.08471	0.91224	Experimental_No_Manganese	Control_Manganese	79143.5	A-kinase anchor protein 200 OS=Drosophila melanogaster OX=7227 GN=Akap200 PE=1 SV=3	3772.64	3868.56	3777.92	3806.37	3.58051	0.0141654	3	355	4200.88	3997.38	4188.19	4128.82	3.61583	0.0276123	3	332	1.08471	0.117312	0.0114354
P29613;P29613-1	13	11	63.1689	0.175788	0.75501	0.0764344	1.0521	0.245545	Control_Manganese	Experimental_No_Manganese	26910.7	Triosephosphate isomerase OS=Drosophila melanogaster OX=7227 GN=Tpi PE=1 SV=3	3949.34	3620.48	3767.69	3779.17	3.5774	0.043589	3	357	3720.14	3526.25	3529.66	3592.02	3.55534	0.0308931	3	401	0.950478	-0.0732745	0.178008
Q8SXS7	7	3	32.5421	0.602564	0.219997	0.188581	1.01428	0.072791	Control_Manganese	Experimental_No_Manganese	53638.4	RE36938p OS=Drosophila melanogaster OX=7227 GN=Dmel\CG3734 PE=2 SV=1	3835.53	3791.91	3705.46	3777.63	3.57722	0.0175243	3	358	3860.86	3753.55	3558.92	3724.45	3.57106	0.0410958	3	382	0.985921	-0.0204565	0.610078
Q94516	10	8	41.2935	0.00118652	2.92572	0.00262711	1.16237	0.999933	Control_Manganese	Experimental_No_Manganese	27528.7	ATP synthase subunit b_ mitochondrial OS=Drosophila melanogaster OX=7227 GN=ATPsynB PE=2 SV=2	3814.61	3662.03	3850.29	3775.64	3.57699	0.0264842	3	359	3185.13	3285.64	3273.91	3248.23	3.51165	0.0169197	3	444	0.860312	-0.217069	0.00132013
Q8MSU4	8	5	30.9752	0.978567	0.00940939	0.26768	1.00103	0.050058	Control_Manganese	Experimental_No_Manganese	133104	Symplekin OS=Drosophila melanogaster OX=7227 GN=Sym PE=1 SV=1	3903.37	3838.66	3571.58	3771.2	3.57648	0.0466382	3	360	3958.18	3763.72	3580.01	3767.3	3.57603	0.0501969	3	377	0.998967	-0.00149174	0.980399
Q9VKX2	18	14	53.1331	0.00191324	2.71823	0.00349473	1.14504	0.999289	Control_Manganese	Experimental_No_Manganese	36229.7	Malate dehydrogenase OS=Drosophila melanogaster OX=7227 GN=Mdh1 PE=1 SV=2	3664.66	3775.09	3842.23	3760.66	3.57526	0.0238412	3	361	3340.07	3308.51	3204.37	3284.32	3.51645	0.0216206	3	437	0.873336	-0.195392	0.00195806
Q9VAX7;Q8MST5	23	10	143.985	0.170405	0.768518	0.0747589	1.03954	0.251789	Control_Manganese	Experimental_No_Manganese	51909	Tubulin beta chain OS=Drosophila melanogaster OX=7227 GN=betaTub97EF PE=1 SV=3	3784.23	3793.48	3670.29	3749.34	3.57395	0.0182998	3	362	3467.03	3723.55	3629.58	3606.72	3.55711	0.0359827	3	398	0.961962	-0.0559489	0.167719
Q9VFW8;Q9VFW9	11	7	66.6814	0.0402556	1.39517	0.0270372	1.10529	0.617099	Control_Manganese	Experimental_No_Manganese	100759	Aminopeptidase OS=Drosophila melanogaster OX=7227 GN=Dmel\CG8774 PE=1 SV=2	3644.06	3577.32	3974.26	3731.88	3.57193	0.056954	3	363	3349.95	3421.43	3357.74	3376.37	3.52845	0.0116152	3	419	0.904739	-0.144427	0.0464459
Q9VQT0	2	1	9.614	0.00277367	2.55695	0.00447894	1.43971	0.996945	Experimental_No_Manganese	Control_Manganese	60717.1	Dorothy_ isoform A OS=Drosophila melanogaster OX=7227 GN=Ugt36A1 PE=1 SV=3	3470.62	3891.82	3823.69	3728.71	3.57156	0.0606352	3	364	5049.41	5238.34	5817.05	5368.27	3.72983	0.0745071	3	242	1.43971	0.525779	0.00348127
Q8MT58	18	7	112.432	0.000431021	3.3655	0.00153167	1.24177	1	Control_Manganese	Experimental_No_Manganese	53563	RE11562p OS=Drosophila melanogaster OX=7227 GN=Dmel\CG17337 PE=1 SV=1	3634.11	3708.38	3834.88	3725.79	3.57122	0.0272463	3	366	2969.62	3076.89	2954.62	3000.38	3.47718	0.0222263	3	471	0.805299	-0.312403	0.000492829
Q9VXI1	24	22	117.637	0.0199142	1.70084	0.0164922	1.13628	0.798203	Control_Manganese	Experimental_No_Manganese	34957.4	RH68464p OS=Drosophila melanogaster OX=7227 GN=Had1 PE=1 SV=2	3575.86	3693.5	3838.32	3702.56	3.5685	0.0355059	3	367	3438.5	3178.53	3158.46	3258.5	3.51302	0.0479387	3	443	0.880066	-0.184317	0.0196511
P53777;A0A0B4LGF8;B7YZP9	4	3	14.2607	0.00304784	2.51601	0.00469048	1.11427	0.995772	Experimental_No_Manganese	Control_Manganese	10471.6	Muscle LIM protein 1 OS=Drosophila melanogaster OX=7227 GN=Mlp60A PE=2 SV=1	3604.4	3745.98	3752.19	3700.86	3.5683	0.0225872	3	368	4073.07	4086.6	4211.56	4123.74	3.61529	0.0185146	3	335	1.11427	0.156094	0.00294039
P21187	24	18	115.195	0.622925	0.205564	0.192793	1.01032	0.0702249	Experimental_No_Manganese	Control_Manganese	70153.7	Polyadenylate-binding protein OS=Drosophila melanogaster OX=7227 GN=pAbp PE=1 SV=3	3789.58	3558.07	3751.95	3699.87	3.56819	0.033577	3	369	3768.54	3723.2	3722.39	3738.04	3.57264	0.00706632	3	381	1.01032	0.01481	0.630116
Q9VRX3	2	1	9.3252	4.54731e-05	4.34225	0.000423217	1.85264	1	Experimental_No_Manganese	Control_Manganese	51242.7	Probable tubulin beta chain CG32396 OS=Drosophila melanogaster OX=7227 GN=CG32396 PE=2 SV=1	3738.15	3625.95	3724.78	3696.29	3.56777	0.0165802	3	370	7276.47	6669.71	6597.46	6847.88	3.83556	0.0544583	3	175	1.85264	0.889579	0.000133557
Q9U915	15	13	53.2146	0.0575559	1.23991	0.0340079	1.10152	0.517874	Control_Manganese	Experimental_No_Manganese	26713.6	Adenylate kinase OS=Drosophila melanogaster OX=7227 GN=Adk2 PE=1 SV=1	3908.08	3612.57	3568.21	3696.29	3.56777	0.0499844	3	371	3509.29	3294.83	3262.73	3355.62	3.52577	0.0399484	3	424	0.907835	-0.139499	0.0610066
Q9W5W8	4	1	22.2532	0.659451	0.180817	0.201213	1.01708	0.0661179	Control_Manganese	Experimental_No_Manganese	34160.3	RE22677p OS=Drosophila melanogaster OX=7227 GN=Dmel\CG9577 PE=1 SV=2	3771.86	3675.68	3616.72	3688.08	3.5668	0.021233	3	372	3845.57	3637.67	3395.25	3626.16	3.55945	0.0621538	3	395	0.983211	-0.0244273	0.676354
Q9VAM6	5	5	32.1022	0.0362687	1.44047	0.0252713	1.20216	0.645796	Control_Manganese	Experimental_No_Manganese	14975.1	CDGSH iron-sulfur domain-containing protein 2 homolog OS=Drosophila melanogaster OX=7227 GN=Cisd2 PE=2 SV=1	4050.25	3600.53	3396.85	3682.54	3.56615	0.0907891	3	373	3232.75	3008.5	2948.54	3063.26	3.48618	0.0489066	3	466	0.831834	-0.265633	0.0429106
Q9VL70	22	17	109.903	0.0391265	1.40753	0.0265526	1.12178	0.624957	Experimental_No_Manganese	Control_Manganese	41952.2	HL08109p OS=Drosophila melanogaster OX=7227 GN=yip2 PE=1 SV=1	3591.02	3503.69	3816.86	3637.19	3.56077	0.044432	3	375	3863.61	4250.85	4125.91	4080.13	3.61067	0.0484392	3	339	1.12178	0.16579	0.0397434
Q0KI66;Q0KI67;Q8IH49;Q8INC3;Q9VEZ0;A0A0B4KGR6;Q8INC1	7	3	29.0073	0.00425768	2.37083	0.00585974	1.20964	0.988232	Experimental_No_Manganese	Control_Manganese	216780	Myosin heavy chain-like_ isoform F OS=Drosophila melanogaster OX=7227 GN=Mhcl PE=3 SV=1	3812.6	3433.81	3614.51	3620.3	3.55875	0.0523329	3	376	4311.69	4338.64	4487.5	4379.28	3.6414	0.0216222	3	310	1.20964	0.274582	0.00342843
A1ZB71	12	10	52.8474	0.0159778	1.79648	0.014408	1.0961	0.845191	Experimental_No_Manganese	Control_Manganese	25014.7	Glutathione S transferase E6 OS=Drosophila melanogaster OX=7227 GN=GstE6 PE=1 SV=1	3596.47	3572.34	3683.66	3617.49	3.55841	0.0161888	3	377	3811.95	3990.75	4092.67	3965.12	3.59826	0.0358392	3	352	1.0961	0.132377	0.0172845
Q0E8N6;Q9VIE2	10	4	49.619	0.575683	0.239817	0.182952	1.03137	0.0765132	Experimental_No_Manganese	Control_Manganese	113333	Clumsy_ isoform B OS=Drosophila melanogaster OX=7227 GN=clumsy PE=3 SV=1	3696.14	3753.13	3352.44	3600.57	3.55637	0.0602046	3	378	3479.56	3716.22	3944.8	3713.52	3.56979	0.0626442	3	383	1.03137	0.0445634	0.571653
P22769	5	5	28.8139	0.0834802	1.07842	0.0441568	1.06711	0.417911	Control_Manganese	Experimental_No_Manganese	28201.2	Proteasome subunit alpha type-7-1 OS=Drosophila melanogaster OX=7227 GN=Prosalpha4 PE=1 SV=2	3573.67	3443.72	3748.48	3588.62	3.55493	0.0426142	3	379	3305.1	3454.99	3328.71	3362.93	3.52672	0.0239649	3	423	0.937109	-0.0937108	0.0865486
A0A0B4K6U6;Q08473;Q08473-2;Q08473-3	9	8	59.7466	0.0667071	1.17583	0.0376268	1.05334	0.477503	Experimental_No_Manganese	Control_Manganese	33111.2	Squid_ isoform E OS=Drosophila melanogaster OX=7227 GN=sqd PE=4 SV=1	3663.03	3570.67	3482.54	3572.08	3.55292	0.0252664	3	380	3862.33	3755.79	3669.66	3762.6	3.57549	0.025651	3	378	1.05334	0.0749651	0.0669611
A8QI68	5	2	27.7796	0.0128335	1.89165	0.0124398	1.07381	0.885466	Experimental_No_Manganese	Control_Manganese	147624	Polycystin-related Y protein OS=Drosophila melanogaster OX=7227 GN=PRY PE=4 SV=3	3584.42	3512.98	3611.96	3569.78	3.55264	0.0143114	3	381	3930.91	3739.95	3828.9	3833.25	3.58357	0.0249284	3	364	1.07381	0.102732	0.0135701
Q9V7Y2	12	10	61.0168	5.96552e-05	4.22435	0.000490084	1.90616	1	Experimental_No_Manganese	Control_Manganese	60875.6	Sphingosine-1-phosphate lyase OS=Drosophila melanogaster OX=7227 GN=Sply PE=1 SV=1	3490.22	3400.48	3799.48	3563.39	3.55186	0.0587419	3	382	6796.28	6959.98	6620.97	6792.41	3.83202	0.0249599	3	177	1.90616	0.930673	3.17917e-05
Q9VSL4	14	12	58.3833	0.00971658	2.01249	0.0104632	1.07982	0.926534	Control_Manganese	Experimental_No_Manganese	28782.2	Glutathione S transferase O2_ isoform B OS=Drosophila melanogaster OX=7227 GN=GstO2 PE=1 SV=2	3612.93	3439.78	3553.02	3535.24	3.54842	0.0248738	3	383	3224.94	3281.8	3315.03	3273.92	3.51507	0.0139155	3	440	0.926082	-0.110788	0.0102592
Q0KHZ6	20	14	85.4611	0.134162	0.872369	0.0626561	1.05353	0.30275	Control_Manganese	Experimental_No_Manganese	27274.8	Uncharacterized protein_ isoform A OS=Drosophila melanogaster OX=7227 GN=Dmel\CG7834 PE=1 SV=1	3558.92	3483.12	3547.49	3529.84	3.54776	0.0115778	3	384	3531.26	3295.84	3224.42	3350.51	3.52511	0.047921	3	426	0.949194	-0.0752247	0.134081
Q7JRC3	15	7	79.3982	0.054118	1.26666	0.0325452	1.12584	0.534902	Experimental_No_Manganese	Control_Manganese	54855.9	Epoxide hydrolase OS=Drosophila melanogaster OX=7227 GN=Jheh1 PE=2 SV=1	3598.76	3309.99	3674.48	3527.74	3.5475	0.0545241	3	385	4212.03	3820.65	3882.37	3971.68	3.59897	0.0529804	3	350	1.12584	0.171004	0.0542547
P48149;E1JJM9;Q7KR04	8	6	47.3866	0.128147	0.892292	0.060791	1.0294	0.313107	Control_Manganese	Experimental_No_Manganese	14942.6	40S ribosomal protein S15Aa OS=Drosophila melanogaster OX=7227 GN=RpS15Aa PE=1 SV=2	3430.37	3490.59	3601.89	3507.62	3.54501	0.0248095	3	386	3389.31	3393.21	3439.77	3407.43	3.53243	0.00823843	3	414	0.971438	-0.0418068	0.130576
Q9VZW7	17	9	80.1695	0.0873885	1.05855	0.0454855	1.04701	0.406097	Experimental_No_Manganese	Control_Manganese	75677.4	Carnitine palmitoyltransferase 2 OS=Drosophila melanogaster OX=7227 GN=CPT2 PE=1 SV=1	3557.81	3416.02	3492.91	3488.91	3.54269	0.0203432	3	388	3765.74	3557.25	3635.84	3652.94	3.56264	0.0288242	3	390	1.04701	0.06628	0.0888824
Q5BI62	3	3	13.1528	0.779163	0.108372	0.226773	1.01083	0.0564032	Experimental_No_Manganese	Control_Manganese	146248	LP14331p OS=Drosophila melanogaster OX=7227 GN=Mdr50 PE=1 SV=1	3626.12	3539.71	3297.36	3487.73	3.54254	0.0488663	3	389	3607.64	3605.48	3363.38	3525.5	3.54722	0.0398252	3	406	1.01083	0.0155389	0.781784
Q9V3Z4	7	3	29.3543	0.00328899	2.48294	0.00494478	1.10059	0.99457	Control_Manganese	Experimental_No_Manganese	58489.2	GH11341p OS=Drosophila melanogaster OX=7227 GN=Rpn5 PE=1 SV=1	3537.13	3385.49	3490.83	3471.15	3.54047	0.0223892	3	390	3105.17	3189.32	3167.24	3153.91	3.49885	0.0138332	3	454	0.908607	-0.138272	0.00351385
Q03334;X2J950	6	6	28.3071	0.0268965	1.5703	0.0203753	1.02733	0.725307	Control_Manganese	Experimental_No_Manganese	17178.4	40S ribosomal protein S13 OS=Drosophila melanogaster OX=7227 GN=RpS13 PE=1 SV=3	3488.35	3406.68	3474.49	3456.5	3.53864	0.0126443	3	392	3346.26	3367.52	3379.82	3364.53	3.52692	0.00504588	3	422	0.973392	-0.0389065	0.0273414
Q9VHR8;Q9VHR8-2	29	20	152.374	0.376734	0.423965	0.136103	1.06092	0.121292	Experimental_No_Manganese	Control_Manganese	89707.6	Dipeptidyl peptidase 3 OS=Drosophila melanogaster OX=7227 GN=DppIII PE=2 SV=2	3748.33	3264.28	3323.11	3445.24	3.53722	0.0766653	3	393	3841.3	3759.69	3364.38	3655.13	3.5629	0.0697858	3	389	1.06092	0.0853174	0.378194
A1ZBP5	3	2	12.4363	0.522268	0.282107	0.171124	1.02095	0.0851969	Control_Manganese	Experimental_No_Manganese	68073.6	FI19322p1 OS=Drosophila melanogaster OX=7227 GN=Dmel\CG15128 PE=2 SV=1	3555.39	3370.62	3404.6	3443.54	3.537	0.02856	3	394	3377.35	3223.12	3518.1	3372.86	3.528	0.0437439	3	420	0.979476	-0.0299187	0.527923
P91929;A4V383	9	5	58.713	0.268216	0.571515	0.105583	1.02688	0.169797	Control_Manganese	Experimental_No_Manganese	47239.8	NADH dehydrogenase [ubiquinone] 1 alpha subcomplex subunit 10_ mitochondrial OS=Drosophila melanogaster OX=7227 GN=ND-42 PE=2 SV=2	3392.23	3355.52	3395.59	3381.11	3.52906	0.00657374	3	396	3419.43	3272.5	3185.87	3292.6	3.51754	0.0358592	3	434	0.97382	-0.0382727	0.27098
Q9V6H1	4	1	18.3405	0.0959332	1.01803	0.0488913	1.08878	0.382434	Control_Manganese	Experimental_No_Manganese	60387.2	Probable cytochrome P450 9h1 OS=Drosophila melanogaster OX=7227 GN=Cyp9h1 PE=3 SV=1	3425.03	3392.18	3277.44	3364.88	3.52697	0.0230277	3	398	2952.26	2994.42	3324.84	3090.51	3.49003	0.0660191	3	462	0.918459	-0.122713	0.0950127
Q9VN93;Q9VN93-2	6	6	25.0222	0.601494	0.220768	0.188581	1.03512	0.0729316	Experimental_No_Manganese	Control_Manganese	69588.3	Putative cysteine proteinase CG12163 OS=Drosophila melanogaster OX=7227 GN=CG12163 PE=2 SV=2	3642.46	2995.41	3450.56	3362.81	3.5267	0.0988245	3	399	3642.26	3508.37	3292.09	3480.9	3.54169	0.0507613	3	409	1.03512	0.0497952	0.615685
Q8SY19;Q8SY70	9	6	37.9662	0.0318988	1.49623	0.0229632	1.13616	0.680562	Experimental_No_Manganese	Control_Manganese	16867.2	Microsomal glutathione S-transferase-like_ isoform A OS=Drosophila melanogaster OX=7227 GN=Mgstl PE=1 SV=1	3458.71	3190.66	3424.83	3358.06	3.52609	0.043467	3	400	3722.74	4046.75	3676.44	3815.31	3.58153	0.0528829	3	368	1.13616	0.184171	0.0335265
Q9VRP2	9	8	41.6198	0.000211306	3.67509	0.000920376	1.20386	1	Control_Manganese	Experimental_No_Manganese	43229.6	Uncharacterized protein_ isoform A OS=Drosophila melanogaster OX=7227 GN=Dmel\CG10576 PE=1 SV=1	3393.15	3369.13	3289.12	3350.47	3.52511	0.0162571	3	401	2742.35	2763.98	2842.98	2783.11	3.44453	0.0190328	3	504	0.830662	-0.267667	0.000206118
Q9VEA2	2	2	9.4233	0.455659	0.341361	0.155037	1.3048	0.0989952	Control_Manganese	Experimental_No_Manganese	101077	GH10703p OS=Drosophila melanogaster OX=7227 GN=Vps39 PE=2 SV=1	5015.94	2823.04	2211.61	3350.2	3.52507	0.440158	3	402	3024.18	2268.27	2410.31	2567.59	3.40952	0.15647	3	540	0.766398	-0.383834	0.425234
Q9VBT4	19	16	93.5062	0.0217902	1.66174	0.0176297	1.14657	0.77732	Experimental_No_Manganese	Control_Manganese	50104.7	IP12282p OS=Drosophila melanogaster OX=7227 GN=CG13657 PE=2 SV=2	3256.91	3424.43	3324.32	3335.22	3.52312	0.025273	3	403	3568.03	3927.63	3976.57	3824.08	3.58253	0.0583377	3	367	1.14657	0.19733	0.0237878
P62152;A0A0B4LF57	7	7	47.2692	0.438291	0.358237	0.151347	1.01716	0.103264	Experimental_No_Manganese	Control_Manganese	16810.6	Calmodulin OS=Drosophila melanogaster OX=7227 GN=Cam PE=1 SV=2	3441.95	3215.53	3302.11	3319.86	3.52112	0.0344133	3	404	3378.54	3399.91	3352.02	3376.82	3.52851	0.00710536	3	418	1.01716	0.0245443	0.445613
P84040;A0A0B4KFZ9	11	11	53.7068	0.00808668	2.09223	0.00926988	1.16737	0.947478	Control_Manganese	Experimental_No_Manganese	11381.4	Histone H4 OS=Drosophila melanogaster OX=7227 GN=His4 PE=1 SV=2	3504.82	3275.32	3159.55	3313.23	3.52025	0.0530381	3	405	2793.22	2867.19	2854.21	2838.21	3.45304	0.013915	3	490	0.856629	-0.223258	0.0102756
Q7K3B7	9	5	58.7721	0.0486293	1.3131	0.0303519	1.09447	0.564607	Control_Manganese	Experimental_No_Manganese	62835.2	LD40177p OS=Drosophila melanogaster OX=7227 GN=Hacl PE=1 SV=1	3108.84	3311.91	3467.19	3295.98	3.51798	0.0545231	3	408	3015.88	3028.38	2990.16	3011.48	3.47878	0.00647137	3	469	0.913681	-0.130238	0.0526523
Q9VRT2	8	7	28.4945	0.0135391	1.86841	0.0129962	1.14365	0.876262	Control_Manganese	Experimental_No_Manganese	31256.2	RE65433p OS=Drosophila melanogaster OX=7227 GN=SP78 PE=1 SV=1	3434.16	3269.27	3180.32	3294.59	3.5178	0.0390946	3	409	2764.88	2888.03	2989.36	2880.76	3.45951	0.0390234	3	487	0.874391	-0.19365	0.0137769
Q9VIQ1	12	7	43.9922	0.611999	0.213249	0.190619	1.01214	0.0715759	Experimental_No_Manganese	Control_Manganese	25187.7	IP07705p OS=Drosophila melanogaster OX=7227 GN=AANATL3 PE=2 SV=1	3348.44	3276.31	3250.59	3291.78	3.51743	0.015409	3	410	3207.46	3423.89	3363.89	3331.74	3.52267	0.0335382	3	430	1.01214	0.0174097	0.60283
Q9VZC8	1	1	4.1926	0.0110353	1.95722	0.0113218	1.1587	0.909165	Control_Manganese	Experimental_No_Manganese	17273.9	GEO12024p1 OS=Drosophila melanogaster OX=7227 GN=Dmel\CG15019 PE=1 SV=1	3403.85	3243.63	3191.29	3279.59	3.51582	0.0337685	3	411	2748.41	2983.47	2759.34	2830.41	3.45185	0.0468727	3	492	0.863038	-0.212505	0.010807
Q9VHS0	5	3	23.3542	0.577552	0.238409	0.183397	1.01456	0.0762413	Control_Manganese	Experimental_No_Manganese	59251.9	FI07206p OS=Drosophila melanogaster OX=7227 GN=28573184 PE=1 SV=2	3289.31	3222.33	3313.74	3275.13	3.51523	0.0144514	3	412	3098.36	3357.52	3228.45	3228.11	3.50895	0.0401409	3	449	0.985644	-0.0208609	0.586718
Q9VGF3	21	15	97.8367	0.0418894	1.3779	0.0277643	1.09951	0.606081	Experimental_No_Manganese	Control_Manganese	39039.6	IP11040p OS=Drosophila melanogaster OX=7227 GN=Dmel\CG18547 PE=1 SV=1	3220.69	3337.08	3256.63	3271.47	3.51474	0.0182173	3	413	3540.81	3442.18	3808.08	3597.02	3.55594	0.0526325	3	400	1.09951	0.136865	0.0468204
Q9W2E7	1	1	4.138	0.132722	0.877056	0.0622812	1.05942	0.305171	Experimental_No_Manganese	Control_Manganese	39245.1	Rae1 OS=Drosophila melanogaster OX=7227 GN=Rae1 PE=1 SV=1	3318.68	3351.57	3118.94	3263.06	3.51363	0.0385808	3	414	3543.69	3511.7	3315.47	3456.95	3.53869	0.0357435	3	410	1.05942	0.0832741	0.129671
Q9VUE8;Q15K24	9	5	35.7693	4.69419e-07	6.32844	4.58732e-05	4.10636	1	Experimental_No_Manganese	Control_Manganese	288884	Big bang_ isoform C OS=Drosophila melanogaster OX=7227 GN=bbg PE=2 SV=2	3132	3313.49	3293.18	3246.23	3.51138	0.0306331	3	415	12982	13697.7	13310.9	13330.2	4.12484	0.0268757	3	54	4.10636	2.03786	1.22836e-06
Q9W392	19	11	110.101	0.036889	1.4331	0.0254872	1.04523	0.641152	Experimental_No_Manganese	Control_Manganese	58520.2	Chaperonin containing TCP1 subunit 2 OS=Drosophila melanogaster OX=7227 GN=CCT2 PE=1 SV=2	3182.78	3197.76	3313.65	3231.4	3.50939	0.0221659	3	416	3399.04	3332.22	3401.44	3377.57	3.5286	0.0116322	3	417	1.04523	0.063825	0.0362573
E1JHL2	7	4	31.2589	0.0291618	1.53519	0.0216303	1.2701	0.704337	Experimental_No_Manganese	Control_Manganese	48350.5	Uncharacterized protein_ isoform B OS=Drosophila melanogaster OX=7227 GN=CG42627 PE=4 SV=2	3336.97	3118.36	3219.46	3224.93	3.50852	0.033926	3	417	4655.98	3905.84	3726.14	4095.99	3.61236	0.120416	3	338	1.2701	0.344945	0.0404852
M9PBV2;O76268;Q9VQI8;Q8IPZ6	11	6	52.0242	0.413824	0.383184	0.144559	1.01989	0.109845	Control_Manganese	Experimental_No_Manganese	58205.6	NTPase_ isoform F OS=Drosophila melanogaster OX=7227 GN=NTPase PE=1 SV=1	3224.24	3148.17	3290.94	3221.12	3.50801	0.0221772	3	419	3175.88	3244.18	3054.87	3158.31	3.49945	0.030356	3	453	0.980501	-0.0284086	0.414354
Q23978	28	17	132	0.00925985	2.0334	0.010139	1.13816	0.932489	Experimental_No_Manganese	Control_Manganese	117723	Unconventional myosin ID OS=Drosophila melanogaster OX=7227 GN=Myo31DF PE=1 SV=1	3261	3265.69	3108.33	3211.68	3.50673	0.0278769	3	420	3818.73	3581.11	3566.4	3655.41	3.56294	0.038745	3	388	1.13816	0.186709	0.0101295
M9PB90;Q9VKY2	17	7	82.7355	0.0215298	1.66696	0.01752	1.08493	0.78016	Control_Manganese	Experimental_No_Manganese	140895	Cullin-associated and neddylation-dissociated 1_ isoform B OS=Drosophila melanogaster OX=7227 GN=Cand1 PE=1 SV=1	3216.22	3159.24	3250.12	3208.53	3.50631	0.0143136	3	421	3073.45	2935.58	2863.03	2957.35	3.4709	0.0361431	3	477	0.921716	-0.117606	0.020128
Q9VVL7	15	11	68.5948	0.0856114	1.06747	0.0448591	1.10792	0.411386	Experimental_No_Manganese	Control_Manganese	53598.2	Dihydrolipoyl dehydrogenase OS=Drosophila melanogaster OX=7227 GN=E3 PE=1 SV=1	3136.99	3027.26	3460.76	3208.33	3.50628	0.0702498	3	422	3442.17	3516.07	3705.47	3554.57	3.55079	0.0382063	3	404	1.10792	0.147851	0.0848783
Q9W0A8	14	10	84.0629	0.386827	0.412483	0.138113	1.02906	0.117983	Control_Manganese	Experimental_No_Manganese	29463.2	FI01658p OS=Drosophila melanogaster OX=7227 GN=RpL23A PE=1 SV=1	3026.87	3216.31	3325.35	3189.51	3.50372	0.0473528	3	425	3121.96	3046.98	3129.38	3099.44	3.49128	0.0147064	3	459	0.971761	-0.0413273	0.378702
O61613	5	2	27.5329	0.778046	0.108994	0.226627	1.01479	0.0564708	Experimental_No_Manganese	Control_Manganese	54175.1	Glycylpeptide N-tetradecanoyltransferase OS=Drosophila melanogaster OX=7227 GN=Nmt PE=2 SV=2	3299.75	3163.49	3100.26	3187.83	3.5035	0.0319812	3	426	2981.71	3324.3	3398.89	3234.97	3.50987	0.068771	3	447	1.01479	0.0211742	0.755444
A0A0B4KEL2;A1Z8F5	1	1	4.9387	0.537279	0.2698	0.174579	1.01536	0.0825677	Control_Manganese	Experimental_No_Manganese	31815.3	Phospholipid scramblase OS=Drosophila melanogaster OX=7227 GN=Dmel\CG9084 PE=3 SV=1	3136.85	3260.83	3156.23	3184.64	3.50306	0.020941	3	427	3015.55	3208.11	3185.7	3136.46	3.49644	0.033575	3	456	0.98487	-0.0219945	0.539821
P29327;Q95TP9;P29327-2	14	9	55.2316	0.942925	0.0255229	0.260851	1.00572	0.0504124	Control_Manganese	Experimental_No_Manganese	28578.6	40S ribosomal protein S6 OS=Drosophila melanogaster OX=7227 GN=RpS6 PE=1 SV=1	3087.41	2984.1	3478.58	3183.37	3.50289	0.081935	3	428	3131.87	3239.66	3124.28	3165.27	3.50041	0.0203884	3	452	0.994315	-0.00822553	0.912748
P50887	7	4	23.7061	0.289507	0.538341	0.112268	1.0405	0.157926	Experimental_No_Manganese	Control_Manganese	30667.6	60S ribosomal protein L22 OS=Drosophila melanogaster OX=7227 GN=RpL22 PE=1 SV=2	3253.59	2971.08	3245.77	3156.81	3.49925	0.0509677	3	429	3192.18	3338.21	3323.56	3284.65	3.51649	0.0244826	3	436	1.0405	0.057272	0.285753
Q9VPB6	3	3	14.0437	0.219959	0.657659	0.0903155	1.05606	0.203237	Control_Manganese	Experimental_No_Manganese	54956.7	RE19263p OS=Drosophila melanogaster OX=7227 GN=Dmel\CG11396 PE=2 SV=2	3260.13	3002.29	3189.46	3150.63	3.4984	0.042288	3	430	3122.8	2997.08	2830.28	2983.38	3.47471	0.0491863	3	474	0.946918	-0.078688	0.217689
Q9VXC6	5	4	23.3387	8.69261e-06	5.06085	0.000188771	1.33161	1	Experimental_No_Manganese	Control_Manganese	27203.3	Uncharacterized protein OS=Drosophila melanogaster OX=7227 GN=Dmel\CG4653 PE=3 SV=1	3125.38	3139.05	3169.88	3144.77	3.49759	0.00724915	3	431	4213.95	4113.3	4235.59	4187.61	3.62197	0.0155836	3	325	1.33161	0.413174	1.27453e-05
P41042;X2JGM9	20	18	83.6549	0.0182014	1.7399	0.015467	1.16311	0.818128	Experimental_No_Manganese	Control_Manganese	29248.3	40S ribosomal protein S4 OS=Drosophila melanogaster OX=7227 GN=RpS4 PE=1 SV=2	3307.96	3022.74	3098.32	3143.01	3.49735	0.0470143	3	432	3784.17	3730.09	3452.74	3655.67	3.56297	0.0486388	3	387	1.16311	0.21799	0.0184475
P91928;A0A0B4KGN2;A0A0B4KHL7;P91928-2	22	14	117.361	0.025416	1.59489	0.0195955	1.08023	0.739689	Control_Manganese	Experimental_No_Manganese	82242.4	MICOS complex subunit Mic60 OS=Drosophila melanogaster OX=7227 GN=Mitofilin PE=1 SV=4	3223.92	3074.07	3108.84	3135.61	3.49632	0.0250134	3	433	2956.12	2805.33	2946.75	2902.73	3.46281	0.029106	3	483	0.925732	-0.111334	0.0249213
Q03427;A0A0B4KFY9	20	13	92.5553	0.351443	0.454146	0.129587	1.03702	0.130311	Experimental_No_Manganese	Control_Manganese	69973.9	Lamin-C OS=Drosophila melanogaster OX=7227 GN=LamC PE=1 SV=2	2977.17	3316.21	3075.31	3122.9	3.49456	0.0558641	3	434	3273.64	3143.59	3298.25	3238.49	3.51034	0.0256608	3	446	1.03702	0.0524387	0.358667
Q8SYJ2	3	2	19.2447	0.0189342	1.72275	0.015951	1.12251	0.809503	Experimental_No_Manganese	Control_Manganese	9490.79	GEO09626p1 OS=Drosophila melanogaster OX=7227 GN=ND-MLRQ PE=1 SV=1	3232.78	3119	3009.94	3120.57	3.49423	0.0357084	3	435	3348.98	3578.74	3580.94	3502.89	3.54443	0.0380524	3	407	1.12251	0.166734	0.0189159
A0A0B4LFR4;Q7K110	8	4	32.5614	0.0443105	1.35349	0.0286292	1.08835	0.590479	Experimental_No_Manganese	Control_Manganese	69386	Oligosaccharide transferase delta subunit_ isoform B OS=Drosophila melanogaster OX=7227 GN=OstDelta PE=1 SV=1	3146.93	2976.26	3234.1	3119.1	3.49403	0.0420488	3	436	3495.54	3305.09	3383.41	3394.68	3.5308	0.0281979	3	415	1.08835	0.122147	0.042402
Q9VG82;Q9VG82-2;A0A2U8U1P3	21	12	96.9497	0.0344886	1.46232	0.0243786	1.10793	0.659512	Experimental_No_Manganese	Control_Manganese	60792	Probable cytochrome P450 9f2 OS=Drosophila melanogaster OX=7227 GN=Cyp9f2 PE=2 SV=1	2937.93	3287.87	3124.41	3116.74	3.4937	0.0561788	3	437	3431.5	3443.62	3484.28	3453.13	3.53821	0.0080061	3	411	1.10793	0.147869	0.0303025
P18091;F0JAG6;P18091-2;P18091-5;M9MS06;M9PGA7;P18091-3;P18091-4	19	9	93.8238	0.0264609	1.5774	0.0201233	1.11237	0.729482	Control_Manganese	Experimental_No_Manganese	107704	Alpha-actinin_ sarcomeric OS=Drosophila melanogaster OX=7227 GN=Actn PE=1 SV=2	3217.68	3058.18	3054.65	3110.17	3.49278	0.0299422	3	438	2919.51	2800.03	2668.39	2795.98	3.44653	0.0449249	3	498	0.898979	-0.15364	0.0253453
Q9VG81	21	17	82.0719	0.441008	0.355553	0.152012	1.03353	0.102575	Control_Manganese	Experimental_No_Manganese	47478.7	RH49330p OS=Drosophila melanogaster OX=7227 GN=Sccpdh2 PE=1 SV=1	2950.49	3150.26	3226.11	3108.95	3.49261	0.0457949	3	439	3093.8	2842.25	3088.25	3008.1	3.47829	0.0477575	3	470	0.967561	-0.0475748	0.436499
A0A0B4LEQ0	17	6	78.4522	0.00144446	2.8403	0.00292554	1.32304	0.999809	Control_Manganese	Experimental_No_Manganese	48337.9	Uncharacterized protein_ isoform C OS=Drosophila melanogaster OX=7227 GN=Dmel\CG17337 PE=1 SV=1	3028.92	3039.1	3183.88	3083.97	3.48911	0.0281048	3	440	2400.69	2408.3	2183.91	2330.97	3.36754	0.0546615	3	588	0.755834	-0.403858	0.00106799
Q9VW70	5	4	30.0925	0.000204825	3.68862	0.000920376	1.55152	1	Experimental_No_Manganese	Control_Manganese	48278.7	FI21813p1 OS=Drosophila melanogaster OX=7227 GN=BcDNA:GM07843 PE=1 SV=2	3274.17	2966.47	3000.14	3080.26	3.48859	0.0547926	3	441	4803.91	4657.82	4875.57	4779.1	3.67935	0.0232208	3	281	1.55152	0.633686	0.000129155
O96827;A0A0B4LFL3	18	12	84.3096	0.495885	0.304619	0.165109	1.02094	0.090219	Experimental_No_Manganese	Control_Manganese	24304.3	Probable elongation factor 1-beta OS=Drosophila melanogaster OX=7227 GN=eEF1beta PE=1 SV=3	3000.66	3200.11	2980.81	3060.53	3.4858	0.0396301	3	442	3112.71	3219.48	3041.62	3124.6	3.49479	0.0286521	3	458	1.02094	0.0298911	0.502475
P29310-2	16	3	131.658	0.0123437	1.90856	0.0120627	1.12662	0.891897	Control_Manganese	Experimental_No_Manganese	28396.8	Isoform VI' of 14-3-3 protein zeta OS=Drosophila melanogaster OX=7227 GN=14-3-3zeta	2913.41	3069.41	3159.66	3047.49	3.48394	0.0408788	3	443	2778.96	2678.41	2657.58	2704.99	3.43216	0.0239953	3	514	0.887609	-0.172003	0.013443
Q10714;X2J8C3	20	17	76.848	0.000478412	3.3202	0.00162616	1.37072	1	Experimental_No_Manganese	Control_Manganese	71370.5	Angiotensin-converting enzyme OS=Drosophila melanogaster OX=7227 GN=Ance PE=1 SV=3	3162.04	3034.05	2929.91	3042	3.48316	0.0382211	3	444	4344.07	4074.28	4090.79	4169.71	3.62011	0.0362674	3	328	1.37072	0.454929	0.000512729
Q8I099	4	2	18.6111	0.371086	0.430526	0.134684	1.08365	0.123213	Experimental_No_Manganese	Control_Manganese	35683.2	Uncharacterized protein_ isoform A OS=Drosophila melanogaster OX=7227 GN=Dmel\CG2663 PE=4 SV=2	3512.54	2669.59	2907.8	3029.98	3.48144	0.143417	3	446	3465.63	3214.61	3170.08	3283.44	3.51633	0.0485299	3	438	1.08365	0.1159	0.396586
Q9VF51	25	17	111.644	0.000967779	3.01422	0.00229272	1.27892	0.99998	Experimental_No_Manganese	Control_Manganese	139655	Aldehyde oxidase 3_ isoform A OS=Drosophila melanogaster OX=7227 GN=AOX3 PE=1 SV=1	3098.32	2921.42	3068.14	3029.29	3.48134	0.0312394	3	447	3996.42	3911.57	3714.64	3874.21	3.58818	0.0373134	3	360	1.27892	0.354922	0.0010649
Q9VMS1	6	4	15.0512	0.0222688	1.6523	0.0178742	1.08474	0.77215	Control_Manganese	Experimental_No_Manganese	8352.63	Cyclope_ isoform A OS=Drosophila melanogaster OX=7227 GN=cype PE=1 SV=3	3064.46	2907.52	3112.06	3028.02	3.48116	0.0353472	3	448	2747.33	2796.01	2831.07	2791.47	3.44583	0.0150642	3	502	0.921881	-0.117348	0.0235268
Q8IPE8;Q9V397	29	16	148.692	0.0457424	1.33968	0.0293122	1.11149	0.581635	Experimental_No_Manganese	Control_Manganese	80037.5	Mitochondrial trifunctional protein alpha subunit_ isoform B OS=Drosophila melanogaster OX=7227 GN=Mtpalpha PE=1 SV=1	2973.67	3195.54	2914.57	3027.92	3.48115	0.0489236	3	449	3205.08	3433.12	3458.33	3365.51	3.52705	0.0414515	3	421	1.11149	0.152496	0.0453086
Q9VB96;A0A0B4K6I6	10	9	55.315	0.0113634	1.94449	0.0115374	1.11925	0.904828	Control_Manganese	Experimental_No_Manganese	52891.4	Uncharacterized protein_ isoform A OS=Drosophila melanogaster OX=7227 GN=150697_at PE=1 SV=2	3037.88	2958.03	3087.6	3027.84	3.48113	0.0215894	3	450	2734.45	2790.62	2590.61	2705.23	3.4322	0.0381337	3	513	0.893452	-0.162538	0.0102193
Q9VG95	2	1	11.5315	0.00820443	2.08595	0.00935002	1.26837	0.946	Experimental_No_Manganese	Control_Manganese	24770.3	Glutathione S-transferase D5 OS=Drosophila melanogaster OX=7227 GN=GstD5 PE=1 SV=2	3188.4	2921.4	2962.55	3024.12	3.4806	0.0475351	3	451	3930.04	4038.88	3538.19	3835.71	3.58385	0.0686543	3	362	1.26837	0.342978	0.00940971
Q9VXI6	7	5	39.4314	0.0477038	1.32145	0.0301246	1.06218	0.569953	Control_Manganese	Experimental_No_Manganese	13625.5	Cytochrome b-c1 complex subunit 7 OS=Drosophila melanogaster OX=7227 GN=UQCR-14 PE=1 SV=1	2990.69	2940.56	3139.89	3023.71	3.48054	0.034292	3	453	2891.73	2833.01	2815.41	2846.71	3.45434	0.0140387	3	489	0.941463	-0.087024	0.0509108
P05661;M9NF46;P05661-10;P05661-11;P05661-13;P05661-14;P05661-16;P05661-5;P05661-6;P05661-7;P05661-8;P05661-9;P05661-15	115	26	566.544	0.0893083	1.04911	0.0462998	1.09721	0.400533	Control_Manganese	Experimental_No_Manganese	225549	Myosin heavy chain_ muscle OS=Drosophila melanogaster OX=7227 GN=Mhc PE=1 SV=4	2831.83	3037.75	3186.77	3018.79	3.47983	0.0590404	3	454	2636.09	2765.47	2852.4	2751.32	3.43954	0.0395615	3	508	0.911399	-0.133846	0.0907829
Q9VVI4	9	7	35.4351	0.0025051	2.60117	0.00422081	1.14591	0.997891	Control_Manganese	Experimental_No_Manganese	45898.1	Jonah 74E_ isoform A OS=Drosophila melanogaster OX=7227 GN=Jon74E PE=1 SV=1	3004.13	2948.06	3048.73	3000.31	3.47717	0.0168129	3	455	2711.64	2576.03	2567.13	2618.27	3.41801	0.0309306	3	530	0.872666	-0.196499	0.00226947
P48375	4	4	16.0225	0.023899	1.62162	0.0187589	1.20324	0.755007	Control_Manganese	Experimental_No_Manganese	11723.2	12 kDa FK506-binding protein OS=Drosophila melanogaster OX=7227 GN=FK506-bp2 PE=3 SV=2	3011.74	3070.69	2908.35	2996.93	3.47668	0.0274216	3	456	2363.37	2747.74	2361.02	2490.71	3.39632	0.0893722	3	558	0.831088	-0.266926	0.0209253
Q9VW68	15	11	72.9521	8.05361e-05	4.09401	0.000516082	1.34405	1	Control_Manganese	Experimental_No_Manganese	54984	Gamma-aminobutyric acid transaminase_ isoform A OS=Drosophila melanogaster OX=7227 GN=Gabat PE=1 SV=1	2964.57	2940.17	3065.79	2990.18	3.4757	0.0222766	3	457	2277.14	2216.92	2180.17	2224.75	3.34728	0.0220033	3	610	0.744018	-0.426591	8.83833e-05
Q5LJN3	6	1	24.1332	0.380299	0.419875	0.136712	1.08866	0.120105	Control_Manganese	Experimental_No_Manganese	106930	Occludin-Related Y OS=Drosophila melanogaster OX=7227 GN=ORY PE=1 SV=5	2538.86	3140.85	3224.6	2968.1	3.47248	0.126036	3	458	2566.29	2785.33	2827.52	2726.38	3.43559	0.0514372	3	511	0.918561	-0.122553	0.353799
Q9W2X6	6	4	40.0945	0.0687682	1.16261	0.0384015	1.04826	0.469275	Control_Manganese	Experimental_No_Manganese	16727.9	ATP synthase_ delta subunit_ isoform A OS=Drosophila melanogaster OX=7227 GN=ATPsyndelta PE=1 SV=1	2998.75	2879.89	3012.21	2963.62	3.47182	0.0245707	3	459	2756.89	2855.15	2869.51	2827.18	3.45135	0.0216812	3	493	0.953964	-0.0679934	0.0680148
P17704	9	7	40.9615	0.167042	0.777173	0.0738481	1.05657	0.255838	Control_Manganese	Experimental_No_Manganese	15341.8	40S ribosomal protein S17 OS=Drosophila melanogaster OX=7227 GN=RpS17 PE=1 SV=2	3034.28	2855.42	2998.27	2962.66	3.47168	0.0319302	3	460	2905.45	2849.37	2657.27	2804.03	3.44778	0.0464171	3	497	0.946458	-0.07939	0.162903
Q9VN25;Q9VN25-2	20	11	110.787	0.00370537	2.43117	0.00530551	1.09894	0.99213	Control_Manganese	Experimental_No_Manganese	134507	Eukaryotic translation initiation factor 3 subunit A OS=Drosophila melanogaster OX=7227 GN=eIF3a PE=1 SV=1	3006	2878.44	2977.06	2953.83	3.47039	0.0226409	3	461	2673.83	2658.44	2731.41	2687.89	3.42941	0.0143093	3	515	0.909968	-0.136113	0.00395309
P21520	3	3	12.2199	8.32978e-06	5.07937	0.000188771	1.39243	1	Experimental_No_Manganese	Control_Manganese	90575.7	Protein scabrous OS=Drosophila melanogaster OX=7227 GN=sca PE=2 SV=3	2983.16	2921.7	2946.2	2950.35	3.46987	0.0104859	3	462	4059.48	4187.04	4077.99	4108.17	3.61365	0.016778	3	337	1.39243	0.477606	1.19737e-05
Q9VB14	9	4	39.496	0.00692575	2.15953	0.00827626	1.11447	0.961576	Control_Manganese	Experimental_No_Manganese	18230.7	40S ribosomal protein S10a OS=Drosophila melanogaster OX=7227 GN=RpS10a PE=1 SV=1	2932.76	2911.6	3005.34	2949.9	3.46981	0.0166659	3	463	2679.82	2549.04	2711.84	2646.9	3.42274	0.032585	3	524	0.897285	-0.156361	0.00614382
Q0KHY3;Q0KHY3-1;A0A0B4LHZ4;Q0KHY3-2	22	11	108.093	0.0563274	1.24928	0.033462	1.11302	0.52383	Experimental_No_Manganese	Control_Manganese	166692	Protein mesh OS=Drosophila melanogaster OX=7227 GN=mesh PE=1 SV=2	3113.12	2949.25	2754.17	2938.85	3.46818	0.0611464	3	464	3143.9	3323	3346.1	3271	3.51468	0.0338349	3	441	1.11302	0.15448	0.0526628
P46223;X2JCS6	7	6	41.7474	0.00427233	2.36933	0.00585974	1.14202	0.988119	Experimental_No_Manganese	Control_Manganese	30902.9	60S ribosomal protein L7a OS=Drosophila melanogaster OX=7227 GN=RpL7A PE=1 SV=2	2933.46	2816.27	3009.55	2919.76	3.46535	0.0333468	3	466	3263.47	3402.04	3337.78	3334.43	3.52302	0.0207971	3	429	1.14202	0.191591	0.00386246
P22464;A0A0B4KH34;P22464-2;P22464-3	22	15	88.647	0.0179795	1.74522	0.0153817	1.17708	0.820769	Experimental_No_Manganese	Control_Manganese	36343	Annexin B9 OS=Drosophila melanogaster OX=7227 GN=AnxB9 PE=2 SV=2	2714.05	3046.27	2978.92	2913.08	3.46435	0.0602883	3	467	3560.73	3286.42	3439.65	3428.93	3.53516	0.0400915	3	413	1.17708	0.235215	0.0160482
P08841;A0A0B4LGH1	20	8	105.049	0.608757	0.215556	0.190063	1.01154	0.0719882	Experimental_No_Manganese	Control_Manganese	51419.6	Tubulin beta-3 chain OS=Drosophila melanogaster OX=7227 GN=betaTub60D PE=2 SV=2	2894.75	3008.98	2806.22	2903.32	3.46289	0.0350135	3	469	2907.98	2976.33	2926.16	2936.82	3.46788	0.0120544	3	480	1.01154	0.0165545	0.618395
Q9W0F6	3	2	14.3843	0.00072872	3.13744	0.002006	1.20288	0.999997	Experimental_No_Manganese	Control_Manganese	52219.7	Alpha 1_3 fucosyltransferase OS=Drosophila melanogaster OX=7227 GN=FucTD PE=2 SV=2	2880.2	2889.38	2929.4	2899.66	3.46235	0.00902191	3	471	3379.55	3475.38	3608.9	3487.94	3.54257	0.0330248	3	408	1.20288	0.266491	0.00099301
M9PBN2;Q8SXR1	1	1	4.7929	0.600808	0.221264	0.188581	1.03441	0.0730221	Control_Manganese	Experimental_No_Manganese	27271.9	Neural lazarillo_ isoform B OS=Drosophila melanogaster OX=7227 GN=NLaz PE=1 SV=1	2862.84	2648.91	3134.16	2881.97	3.45969	0.0843841	3	473	2668.53	2741.01	2948.77	2786.11	3.445	0.0522097	3	503	0.966737	-0.0488043	0.589389
Q9VTU2	7	6	44.0744	0.0650675	1.18664	0.0369687	1.18817	0.484259	Control_Manganese	Experimental_No_Manganese	22087.2	NADH dehydrogenase (Ubiquinone) SGDH subunit_ isoform A OS=Drosophila melanogaster OX=7227 GN=ND-SGDH PE=1 SV=1	3051.22	3048.24	2531.3	2876.92	3.45893	0.104042	3	475	2534.86	2405.56	2323.51	2421.31	3.38405	0.0440058	3	572	0.841632	-0.248739	0.0679354
A0A0B4K7Z5;Q7KLV9;Q7KLV9-2	3	1	14.762	0.0268159	1.57161	0.0203537	1.24678	0.726076	Experimental_No_Manganese	Control_Manganese	47548.7	Regulatory particle non-ATPase 6_ isoform C OS=Drosophila melanogaster OX=7227 GN=Rpn6 PE=1 SV=1	3237.85	2696.51	2648.83	2861.06	3.45653	0.114355	3	477	3651.32	3572.29	3477.78	3567.13	3.55232	0.0243572	3	402	1.24678	0.318212	0.0225035
Q9VJH8	12	8	81.6753	0.0084265	2.07435	0.0094924	1.1537	0.943194	Experimental_No_Manganese	Control_Manganese	60705.8	FI03416p OS=Drosophila melanogaster OX=7227 GN=Ugt37D1 PE=1 SV=1	2844.19	2907.6	2809.09	2853.63	3.4554	0.0174966	3	478	3475.58	3183.8	3217.31	3292.23	3.51749	0.0484971	3	435	1.1537	0.20627	0.0104877
Q9XYZ9	6	5	20.2237	0.651266	0.186241	0.199166	1.04913	0.0669858	Experimental_No_Manganese	Control_Manganese	25462.2	Glutathione S transferase E12_ isoform A OS=Drosophila melanogaster OX=7227 GN=GstE12 PE=1 SV=1	3608.21	2512.42	2418.15	2846.26	3.45427	0.232428	3	479	3020.72	3120.39	2817.15	2986.09	3.4751	0.05176	3	473	1.04913	0.0691881	0.739485
M9PCW5;Q7KTJ7;Q8IPG9	6	5	29.3774	0.334116	0.476102	0.124503	1.08599	0.137165	Experimental_No_Manganese	Control_Manganese	29689.8	Basigin_ isoform J OS=Drosophila melanogaster OX=7227 GN=Bsg PE=1 SV=1	2480.6	3241.04	2816.61	2846.08	3.45425	0.133894	3	480	3082.67	3210.42	2979.31	3090.8	3.49007	0.0374558	3	461	1.08599	0.119005	0.347182
Q9VF68	4	2	20.1915	0.0187918	1.72603	0.0158652	1.27108	0.811167	Control_Manganese	Experimental_No_Manganese	29510.4	CG6130 protein OS=Drosophila melanogaster OX=7227 GN=h-cup PE=2 SV=1	2699.46	2841.54	2983.34	2841.45	3.45354	0.0499524	3	481	1990.91	2370.81	2344.64	2235.46	3.34937	0.0949175	3	607	0.786732	-0.346056	0.0147133
Q9V3W0	8	8	42.5086	0.224346	0.649082	0.0919237	1.093	0.199739	Experimental_No_Manganese	Control_Manganese	15047.4	RutC family protein UK114 OS=Drosophila melanogaster OX=7227 GN=UK114 PE=2 SV=1	2936.94	2492.63	3058.59	2829.39	3.45169	0.105292	3	483	3007.22	3172.35	3097.95	3092.51	3.49031	0.0267427	3	460	1.093	0.128287	0.214485
Q9VFW7;Q8INH5;Q8INH6	20	15	101.68	0.000328937	3.48289	0.00126058	1.33622	1	Control_Manganese	Experimental_No_Manganese	113424	Uncharacterized protein_ isoform A OS=Drosophila melanogaster OX=7227 GN=Dmel\CG32473 PE=1 SV=2	2897.47	2712.31	2857.31	2822.36	3.45061	0.034509	3	484	2119.48	2053.2	2163.92	2112.2	3.32473	0.0263792	3	630	0.74838	-0.418157	0.000393418
Q9VKW5	36	27	187.498	0.00280726	2.55172	0.00447894	1.18598	0.996812	Experimental_No_Manganese	Control_Manganese	86824.8	LP07359p OS=Drosophila melanogaster OX=7227 GN=Dmel\CG5355 PE=1 SV=2	2895.47	2808.11	2761.45	2821.68	3.45051	0.024111	3	485	3491.57	3247.15	3300.67	3346.46	3.52459	0.038394	3	427	1.18598	0.246083	0.00333733
Q9VZS5;D1Z3A1	8	6	36.2448	0.0256163	1.59148	0.0196454	1.1241	0.737711	Control_Manganese	Experimental_No_Manganese	16028.9	60S ribosomal protein L28 OS=Drosophila melanogaster OX=7227 GN=RpL28 PE=1 SV=1	2721.76	2847.65	2851.5	2806.97	3.44824	0.026299	3	488	2393.73	2646.37	2451.14	2497.08	3.39743	0.0530371	3	557	0.8896	-0.168772	0.0240129
Q8IQZ8;O61604;Q8IQZ7	37	27	179.266	0.0302826	1.51881	0.0222065	1.19053	0.694403	Experimental_No_Manganese	Control_Manganese	69648.4	FI20019p1 OS=Drosophila melanogaster OX=7227 GN=Fim PE=1 SV=1	3034.39	2628.4	2729.97	2797.59	3.44678	0.0755208	3	490	3543.15	3209.87	3238.81	3330.61	3.52252	0.0554362	3	431	1.19053	0.251603	0.0302057
Q8MSW0	18	9	80.9658	0.000794969	3.09965	0.00212841	1.34298	0.999995	Control_Manganese	Experimental_No_Manganese	142069	Isoleucyl-tRNA synthetase_ isoform A OS=Drosophila melanogaster OX=7227 GN=IleRS PE=1 SV=1	2899.13	2801.28	2619.73	2773.38	3.44301	0.0511191	3	491	2014.84	2092.2	2088.25	2065.1	3.31494	0.021097	3	638	0.744613	-0.425438	0.00116586
A8JRC1;A8JRB8;Q8MT18	8	7	50.711	0.111295	0.953525	0.0549299	1.1126	0.346043	Experimental_No_Manganese	Control_Manganese	43615.6	Uncharacterized protein_ isoform D OS=Drosophila melanogaster OX=7227 GN=Dmel\CG5028 PE=1 SV=1	2631.66	2669.82	3016.96	2772.81	3.44292	0.0765643	3	492	2908.74	3125.06	3221.32	3085.04	3.48926	0.0518918	3	464	1.1126	0.15394	0.111718
Q9VCV4	15	6	84.5209	0.00653209	2.18495	0.00795437	1.19621	0.966109	Control_Manganese	Experimental_No_Manganese	99431.1	Iron regulatory protein 1A OS=Drosophila melanogaster OX=7227 GN=Irp-1A PE=1 SV=1	2896.65	2668.91	2704.3	2756.62	3.44038	0.0444571	3	493	2405.54	2286.67	2221.16	2304.46	3.36257	0.0405593	3	593	0.835972	-0.258474	0.00707402
Q9VVA4;M9NFH8	43	13	260.163	0.851512	0.069809	0.240847	1.00887	0.052833	Control_Manganese	Experimental_No_Manganese	234185	GH26789p OS=Drosophila melanogaster OX=7227 GN=Dmel\CG9674 PE=1 SV=2	2668.25	2716.85	2881.8	2755.63	3.44022	0.0406193	3	494	2994.13	2635.28	2564.79	2731.4	3.43639	0.0842945	3	509	0.991207	-0.012742	0.877731
Q7JWF1	15	10	82.3044	0.0779266	1.10831	0.0421314	1.04608	0.435921	Control_Manganese	Experimental_No_Manganese	66615.5	Electron transfer flavoprotein-ubiquinone oxidoreductase_ isoform A OS=Drosophila melanogaster OX=7227 GN=Etf-QO PE=1 SV=1	2835.52	2717.7	2698	2750.41	3.4394	0.0270384	3	495	2661.06	2571.34	2655.37	2629.26	3.41983	0.0191069	3	527	0.955953	-0.064988	0.0795444
Q9VWN3	7	1	41.3322	0.265746	0.575533	0.105034	1.07502	0.171273	Experimental_No_Manganese	Control_Manganese	47434.1	Succinate dehydrogenase [ubiquinone] iron-sulfur subunit_ mitochondrial OS=Drosophila melanogaster OX=7227 GN=SdhBL PE=3 SV=2	2545.52	2636.94	3031.39	2737.95	3.43743	0.0943061	3	496	3067.7	2919.52	2842.82	2943.35	3.46884	0.0388394	3	478	1.07502	0.104363	0.276211
Q9W3K9	7	4	33.1706	0.00211673	2.67434	0.00374396	1.09135	0.99891	Experimental_No_Manganese	Control_Manganese	35917.6	FI02989p OS=Drosophila melanogaster OX=7227 GN=Ldsdh1 PE=1 SV=1	2689.62	2775.56	2734.3	2733.16	3.43667	0.0157273	3	497	3007.66	3007.93	2932.93	2982.84	3.47463	0.014491	3	475	1.09135	0.126115	0.00208505
Q9VSF7	2	1	9.2545	0.217101	0.663339	0.0897073	1.12947	0.205575	Experimental_No_Manganese	Control_Manganese	59315	GH28769p OS=Drosophila melanogaster OX=7227 GN=Dmel\CG8006 PE=2 SV=1	3228.21	2423.98	2543.49	2731.9	3.43646	0.158849	3	498	3100.84	3063.38	3092.59	3085.6	3.48934	0.00638003	3	463	1.12947	0.175651	0.231267
Q9VL52	7	2	32.4591	0.000662657	3.17871	0.00191873	1.11805	0.999999	Control_Manganese	Experimental_No_Manganese	170134	Putative ATP-dependent RNA helicase SoYb OS=Drosophila melanogaster OX=7227 GN=SoYb PE=2 SV=3	2681.15	2730.76	2781.71	2731.21	3.43635	0.0184094	3	499	2426.89	2465.36	2436.26	2442.84	3.38789	0.00821129	3	569	0.894417	-0.16098	0.000766843
A1Z7E8	14	9	84.7723	0.00156997	2.80411	0.00308387	1.34008	0.999712	Control_Manganese	Experimental_No_Manganese	66647.3	Maltase A4 OS=Drosophila melanogaster OX=7227 GN=Mal-A4 PE=2 SV=1	2828.18	2723.3	2636.8	2729.43	3.43607	0.0351129	3	500	2165.77	2003.82	1940.7	2036.76	3.30894	0.0570003	3	643	0.746224	-0.42232	0.00134338
Q9W2G8	11	9	46.5548	0.146156	0.835182	0.0667425	1.08837	0.283911	Control_Manganese	Experimental_No_Manganese	75908.8	Acyl-coenzyme A oxidase OS=Drosophila melanogaster OX=7227 GN=Acox57D-d PE=1 SV=1	2638.94	2645.4	2900.24	2728.19	3.43588	0.054628	3	501	2355.7	2500.21	2664.09	2506.67	3.3991	0.0615553	3	556	0.918801	-0.122175	0.148193
P29845;A0A0B4LFD2	32	22	158.054	0.00512428	2.29037	0.00661072	1.24477	0.980797	Experimental_No_Manganese	Control_Manganese	74294.3	Heat shock 70 kDa protein cognate 5 OS=Drosophila melanogaster OX=7227 GN=Hsc70-5 PE=1 SV=2	2895.27	2684.88	2597.8	2725.98	3.43552	0.0561022	3	503	3372.71	3269.02	3537.98	3393.23	3.53061	0.0399761	3	416	1.24477	0.315884	0.00482301
A0A0B4KGG5;Q9VDY8	8	6	41.8673	0.364266	0.438581	0.133699	1.07458	0.125602	Control_Manganese	Experimental_No_Manganese	31779.9	Vibrator_ isoform B OS=Drosophila melanogaster OX=7227 GN=vib PE=1 SV=1	2933.03	2804.75	2396.35	2711.38	3.43319	0.103365	3	504	2666.88	2435.94	2466.77	2523.2	3.40195	0.0496922	3	551	0.930596	-0.103773	0.348269
Q7K5K3	16	12	75.9014	0.0919403	1.03649	0.0471639	1.10314	0.393145	Experimental_No_Manganese	Control_Manganese	39636.6	Pyruvate dehydrogenase E1 component subunit beta OS=Drosophila melanogaster OX=7227 GN=Pdhb PE=1 SV=1	2764.03	2713.23	2650.54	2709.27	3.43285	0.0209832	3	505	3243.33	2883.65	2839.1	2988.69	3.47548	0.0741617	3	472	1.10314	0.141612	0.101903
P07191	19	13	104.132	0.000539478	3.26803	0.00175487	1.24191	1	Experimental_No_Manganese	Control_Manganese	64655.9	Maltase A2 OS=Drosophila melanogaster OX=7227 GN=Mal-A2 PE=2 SV=2	2624.02	2684.8	2788.02	2698.95	3.43119	0.0307181	3	506	3271.05	3386.74	3397.73	3351.84	3.52528	0.0209384	3	425	1.24191	0.312558	0.000480811
P17210	17	9	79.3419	0.449658	0.347118	0.154048	1.02943	0.100435	Control_Manganese	Experimental_No_Manganese	110970	Kinesin heavy chain OS=Drosophila melanogaster OX=7227 GN=Khc PE=1 SV=2	2859.58	2600.28	2596.28	2685.38	3.42901	0.0561835	3	507	2619.44	2558.15	2648.27	2608.62	3.41641	0.0176424	3	534	0.971416	-0.0418391	0.446755
Q9W227	14	11	73.0132	0.545584	0.263139	0.175961	1.02962	0.0811792	Control_Manganese	Experimental_No_Manganese	22199.3	Peptidyl-prolyl cis-trans isomerase OS=Drosophila melanogaster OX=7227 GN=Dmel\CG2852 PE=1 SV=1	2871.19	2607.1	2559.91	2679.4	3.42804	0.0626122	3	508	2688.74	2479.43	2638.82	2602.33	3.41536	0.0420105	3	536	0.971236	-0.0421065	0.54148
Q9W293	8	6	33.0337	0.176096	0.754249	0.0764823	1.08064	0.245196	Experimental_No_Manganese	Control_Manganese	82437.4	Uncharacterized protein OS=Drosophila melanogaster OX=7227 GN=Dmel\CG6613 PE=4 SV=1	2920.43	2555.95	2547.92	2674.76	3.42729	0.0795538	3	509	2978.71	2801.95	2890.69	2890.45	3.46097	0.0305762	3	484	1.08064	0.111884	0.180255
Q9VJ39;A4V0U4	10	8	53.0275	1.13519e-05	4.94493	0.000201699	1.22937	1	Control_Manganese	Experimental_No_Manganese	77508.9	Leukotriene A(4) hydrolase OS=Drosophila melanogaster OX=7227 GN=Dmel\CG10602 PE=1 SV=4	2672.84	2691.72	2632.11	2665.56	3.42579	0.0114277	3	511	2154.88	2183.91	2165.89	2168.22	3.3361	0.00675959	3	622	0.813423	-0.297922	1.40842e-05
Q9VD29	12	12	45.4402	0.0077057	2.11319	0.00893801	1.17457	0.952206	Control_Manganese	Experimental_No_Manganese	21925.2	RE74312p OS=Drosophila melanogaster OX=7227 GN=Sar1 PE=1 SV=1	2549.76	2609.45	2792.63	2650.61	3.42335	0.0477471	3	512	2196.69	2330.71	2242.57	2256.66	3.35347	0.0301831	3	599	0.851372	-0.232138	0.00898646
Q9VAN7	11	9	65.7093	0.0382382	1.4175	0.0260402	1.06935	0.631285	Control_Manganese	Experimental_No_Manganese	28629.7	Phosphoglycerate mutase OS=Drosophila melanogaster OX=7227 GN=Pglym78 PE=1 SV=2	2754.83	2629.04	2557.88	2647.25	3.4228	0.0376744	3	513	2485.3	2480.88	2460.55	2475.58	3.39368	0.00533278	3	564	0.93515	-0.0967307	0.0417341
P52034;P52034-3;A0A0B4K7L1;A0A0B4KFI7;P52034-2	5	4	23.1884	2.69054e-05	4.57016	0.00036266	1.76995	1	Experimental_No_Manganese	Control_Manganese	87731.8	ATP-dependent 6-phosphofructokinase OS=Drosophila melanogaster OX=7227 GN=Pfk PE=2 SV=2	2725.09	2687.26	2523.17	2645.17	3.42245	0.0405797	3	514	4745.13	4726.4	4573.97	4681.83	3.67042	0.0200521	3	289	1.76995	0.823711	1.585e-05
P18167	4	1	18.2239	0.203029	0.692442	0.085428	1.06658	0.217807	Experimental_No_Manganese	Control_Manganese	61453.5	Esterase P OS=Drosophila melanogaster OX=7227 GN=Est-P PE=2 SV=2	2568.88	2724.35	2640.25	2644.5	3.42234	0.0294271	3	515	2986.27	2852.81	2622.66	2820.58	3.45034	0.0652123	3	494	1.06658	0.0929975	0.201463
Q9V9S8;Q9V9S8-3;Q9V9S8-2	3	2	18.2802	0.0310983	1.50726	0.0225989	1.10215	0.687347	Control_Manganese	Experimental_No_Manganese	44053.4	Ferrochelatase_ mitochondrial OS=Drosophila melanogaster OX=7227 GN=FeCh PE=2 SV=1	2771.41	2597.15	2556.24	2641.6	3.42187	0.0432565	3	516	2351.41	2476.35	2362.53	2396.76	3.37962	0.0288498	3	577	0.907314	-0.140327	0.0336897
Q9VV60	12	9	55.8708	0.543448	0.264842	0.175534	1.01654	0.081532	Experimental_No_Manganese	Control_Manganese	58444.3	Tyrosine--tRNA ligase OS=Drosophila melanogaster OX=7227 GN=TyrRS PE=1 SV=1	2561.88	2734.07	2533.29	2609.75	3.4166	0.0416179	3	517	2687.06	2665.43	2606.26	2652.92	3.42372	0.0157662	3	523	1.01654	0.0236691	0.555564
P35004;A0A0B4LF52	7	5	28.471	3.3407e-05	4.47616	0.00040248	1.46073	1	Control_Manganese	Experimental_No_Manganese	26092.1	Trypsin beta OS=Drosophila melanogaster OX=7227 GN=betaTry PE=2 SV=2	2661.44	2526.08	2589.73	2592.42	3.41371	0.0261227	3	518	1737.1	1791.57	1795.55	1774.74	3.24913	0.0184014	3	707	0.684589	-0.546691	4.67699e-05
Q9VWF0	2	1	8.5555	0.00111418	2.95304	0.00255091	1.15132	0.999953	Experimental_No_Manganese	Control_Manganese	35077.7	LP01149p OS=Drosophila melanogaster OX=7227 GN=16769716 PE=1 SV=1	2594.28	2556.46	2620.12	2590.29	3.41335	0.0123596	3	519	3059.42	2902.4	2984.95	2982.26	3.47455	0.0263368	3	476	1.15132	0.203293	0.00132113
M9MSL3;Q9VUC1	20	12	116.492	0.351158	0.454497	0.129587	1.04588	0.130419	Experimental_No_Manganese	Control_Manganese	92530.5	Hsc70Cb_ isoform G OS=Drosophila melanogaster OX=7227 GN=Hsc70Cb PE=1 SV=1	2743.54	2420.19	2599.37	2587.7	3.41291	0.0625986	3	520	2584.39	2795.16	2739.69	2706.41	3.43239	0.0403681	3	512	1.04588	0.0647126	0.351999
A1ZA73	8	4	38.9009	0.748407	0.125862	0.219465	1.02008	0.0584112	Control_Manganese	Experimental_No_Manganese	216491	Stretchin-Mlck_ isoform R OS=Drosophila melanogaster OX=7227 GN=Strn-Mlck PE=1 SV=2	2820.1	2516.48	2419.27	2585.28	3.41251	0.0808755	3	521	2622.89	2585.21	2395.09	2534.4	3.40387	0.0481789	3	547	0.980319	-0.0286771	0.734299
Q961L5	2	1	10.2971	0.00324041	2.4894	0.00489056	1.37532	0.994824	Experimental_No_Manganese	Control_Manganese	42096	GH17930p OS=Drosophila melanogaster OX=7227 GN=CG8278 PE=2 SV=1	2426.64	2754.21	2573.98	2584.95	3.41245	0.0634674	3	522	3321.91	3604.84	3738.65	3555.13	3.55086	0.0598488	3	403	1.37532	0.459769	0.00333266
Q9W247	10	6	42.6308	0.588843	0.23	0.186528	1.01484	0.0746412	Control_Manganese	Experimental_No_Manganese	141038	FI03324p OS=Drosophila melanogaster OX=7227 GN=Dmel\CG4752 PE=1 SV=2	2605.91	2609.22	2492.86	2569.33	3.40982	0.0257842	3	524	2469.27	2489.84	2636.16	2531.76	3.40342	0.0359418	3	549	0.985376	-0.0212539	0.594121
Q9VF27	3	3	16.8437	0.121709	0.914677	0.0588023	1.03492	0.324958	Experimental_No_Manganese	Control_Manganese	25091.2	GM02062p OS=Drosophila melanogaster OX=7227 GN=ND-23 PE=1 SV=1	2511.9	2597.1	2597.92	2568.97	3.40976	0.0192406	3	525	2588.41	2703.41	2684.21	2658.68	3.42467	0.0231716	3	521	1.03492	0.0495163	0.120567
P29742;X2JC31	40	26	209.992	0.0746674	1.12687	0.0406504	1.08286	0.447231	Experimental_No_Manganese	Control_Manganese	193060	Clathrin heavy chain OS=Drosophila melanogaster OX=7227 GN=Chc PE=1 SV=1	2563.5	2496.65	2640.56	2566.9	3.40941	0.0280563	3	527	2935.29	2738.13	2665.35	2779.59	3.44398	0.0502456	3	505	1.08286	0.114843	0.0790013
Q24388;X2JCV2	21	16	115.393	7.95838e-06	5.09918	0.000188771	1.7969	1	Experimental_No_Manganese	Control_Manganese	83462.7	Larval serum protein 2 OS=Drosophila melanogaster OX=7227 GN=Lsp2 PE=2 SV=2	2536.87	2473.81	2642.71	2551.13	3.40673	0.0334552	3	528	4630.42	4571.65	4550.3	4584.12	3.66126	0.00905123	3	295	1.7969	0.84551	3.1501e-06
Q7JXF7	2	2	5.8	0.0300766	1.52177	0.0221408	1.14929	0.696207	Control_Manganese	Experimental_No_Manganese	21643.5	Protein seele OS=Drosophila melanogaster OX=7227 GN=sel PE=1 SV=1	2598.27	2450.72	2602.56	2550.52	3.40663	0.0338966	3	529	2378.88	2186.6	2092.17	2219.22	3.3462	0.0658394	3	611	0.870105	-0.200738	0.0277866
Q8IRG6;Q8IRG6-2	13	4	62.6934	0.0176647	1.75289	0.0152093	1.13511	0.824538	Experimental_No_Manganese	Control_Manganese	124211	FACT complex subunit spt16 OS=Drosophila melanogaster OX=7227 GN=dre4 PE=1 SV=2	2552.17	2510.28	2574.55	2545.67	3.4058	0.0128158	3	530	2882.07	3050.83	2735.91	2889.6	3.46084	0.0545376	3	485	1.13511	0.182826	0.0208064
P19109;C7LAE4;E1JJ68;P19109-2;P19109-3;P19109-4;A0A0B4K624;A0A0B4K6A3;A0A0B4K6K1;A0A0B4K6T7	9	6	47.8331	0.709429	0.149091	0.211204	1.00415	0.06142	Experimental_No_Manganese	Control_Manganese	79004	ATP-dependent RNA helicase p62 OS=Drosophila melanogaster OX=7227 GN=Rm62 PE=1 SV=3	2496.66	2575.98	2552.56	2541.73	3.40513	0.0160335	3	531	2544.12	2535.86	2576.85	2552.28	3.40693	0.00849234	3	543	1.00415	0.005971	0.712619
Q9VMF0	17	14	100.719	0.556101	0.254847	0.178717	1.02468	0.0794853	Control_Manganese	Experimental_No_Manganese	48990.7	FI04444p OS=Drosophila melanogaster OX=7227 GN=Dmel\CG9498 PE=1 SV=1	2697.19	2402.11	2505.27	2534.86	3.40395	0.0590749	3	532	2541.2	2446.51	2433.7	2473.8	3.39337	0.0237369	3	565	0.975914	-0.0351734	0.546807
Q7K569	5	3	19.4404	0.0106893	1.97105	0.0111667	1.06972	0.913737	Control_Manganese	Experimental_No_Manganese	81163.8	Glycerol-3-phosphate dehydrogenase OS=Drosophila melanogaster OX=7227 GN=Gpo1 PE=1 SV=1	2497.27	2554.45	2536.41	2529.38	3.40301	0.0115576	3	533	2334.08	2428.17	2331.34	2364.53	3.37374	0.0233175	3	584	0.934827	-0.097229	0.0102197
Q9VJ43	10	2	50.483	0.0303364	1.51804	0.0222065	1.06368	0.693933	Control_Manganese	Experimental_No_Manganese	59634.9	LD10783p OS=Drosophila melanogaster OX=7227 GN=ScpX PE=1 SV=1	2479.1	2538.12	2551.83	2523.01	3.40192	0.0153182	3	534	2396.92	2295.19	2423.78	2371.96	3.37511	0.0285958	3	582	0.94013	-0.0890674	0.028532
Q9VQH6	5	4	28.1841	8.72343e-05	4.05931	0.000541259	1.67558	1	Experimental_No_Manganese	Control_Manganese	44935.7	Uncharacterized protein OS=Drosophila melanogaster OX=7227 GN=dC1GalT4 PE=4 SV=1	2608.79	2371.15	2584.1	2521.35	3.40163	0.0518209	3	535	4280.21	4137.87	4256.09	4224.72	3.6258	0.0180318	3	321	1.67558	0.744662	4.07206e-05
B7Z001;Q9VQL7	53	35	267.941	0.255439	0.592713	0.101991	1.04784	0.177676	Experimental_No_Manganese	Control_Manganese	279768	Fatty acid synthase 1_ isoform C OS=Drosophila melanogaster OX=7227 GN=FASN1 PE=1 SV=2	2421.41	2550.61	2578.57	2516.86	3.40086	0.0333106	3	536	2499.49	2762.23	2650.06	2637.26	3.42115	0.0499909	3	526	1.04784	0.0674154	0.252862
Q7KTW5	10	8	59.3527	0.174942	0.757107	0.0762358	1.03901	0.246508	Experimental_No_Manganese	Control_Manganese	30854	Inositol-1-monophosphatase OS=Drosophila melanogaster OX=7227 GN=IMP PE=1 SV=1	2570.41	2504.87	2466.14	2513.81	3.40033	0.0209673	3	537	2615.85	2698.73	2521.05	2611.88	3.41695	0.0340397	3	533	1.03901	0.0552129	0.175635
Q27597;M9PCQ1;Q8IPJ7	18	12	81.9572	0.336869	0.472539	0.125052	1.03657	0.136036	Control_Manganese	Experimental_No_Manganese	77088.2	NADPH--cytochrome P450 reductase OS=Drosophila melanogaster OX=7227 GN=Cpr PE=2 SV=2	2469.3	2527.21	2518.28	2504.93	3.3988	0.0124473	3	538	2261.71	2468.06	2519.9	2416.56	3.3832	0.05652	3	573	0.964719	-0.0518187	0.335961
Q9VLI0	25	12	157.008	0.00823913	2.08412	0.00936129	1.40265	0.945563	Control_Manganese	Experimental_No_Manganese	112382	Alpha-mannosidase OS=Drosophila melanogaster OX=7227 GN=LManV PE=1 SV=1	2766.4	2312.05	2427.01	2501.82	3.39826	0.0944243	3	539	1926.88	1768.86	1655.16	1783.63	3.25131	0.0765069	3	705	0.712934	-0.488159	0.0103415
A0A0B4KF46;Q8T0L3	20	13	101.581	0.0509976	1.29245	0.0311912	1.05357	0.551384	Experimental_No_Manganese	Control_Manganese	112854	Ubiquitin activating enzyme 1_ isoform C OS=Drosophila melanogaster OX=7227 GN=Uba1 PE=1 SV=1	2554.17	2490.28	2432.43	2492.29	3.3966	0.0244329	3	541	2687.67	2573.58	2616.16	2625.8	3.41926	0.0219562	3	528	1.05357	0.075283	0.0509766
Q7JZE1	1	1	4.4719	0.398029	0.400086	0.141186	1.01824	0.114485	Control_Manganese	Experimental_No_Manganese	27365.8	Peroxin 11 OS=Drosophila melanogaster OX=7227 GN=Pex11 PE=1 SV=1	2416.94	2527.45	2523.6	2489.33	3.39608	0.0251952	3	542	2468.97	2479.36	2385.92	2444.75	3.38823	0.0209471	3	568	0.982091	-0.0260709	0.394273
M9PC99;Q9VQ94	9	6	42.8085	0.000261968	3.58175	0.00105568	1.54245	1	Control_Manganese	Experimental_No_Manganese	134782	Secretory 24CD_ isoform C OS=Drosophila melanogaster OX=7227 GN=Sec24CD PE=1 SV=1	2442.53	2613.76	2411.56	2489.28	3.39607	0.0437497	3	543	1654.23	1532.95	1654.35	1613.84	3.20786	0.0434077	3	745	0.648317	-0.625228	0.000304184
Q9VB10	8	6	38.2593	0.112106	0.950372	0.0551907	1.0472	0.344308	Control_Manganese	Experimental_No_Manganese	44639.3	GH01709p OS=Drosophila melanogaster OX=7227 GN=Dmel\CG5590 PE=1 SV=1	2403.77	2492.29	2479.98	2458.68	3.3907	0.0195015	3	546	2255.67	2395.34	2392.58	2347.86	3.37067	0.034011	3	587	0.954928	-0.0665357	0.108364
Q9VAI9	3	2	7.5204	0.708838	0.149453	0.211204	1.0088	0.0614698	Experimental_No_Manganese	Control_Manganese	17340.8	GEO07291p1 OS=Drosophila melanogaster OX=7227 GN=Obp99c PE=1 SV=1	2455.28	2495.41	2423.13	2457.94	3.39057	0.0147326	3	548	2534.16	2385.05	2519.51	2479.58	3.39438	0.0331449	3	561	1.0088	0.0126452	0.697871
Q9VUZ0	9	7	32.6124	0.0518822	1.28498	0.0315403	1.11489	0.546607	Control_Manganese	Experimental_No_Manganese	21320.4	Translocon-associated protein subunit beta OS=Drosophila melanogaster OX=7227 GN=SsRbeta PE=1 SV=2	2564.73	2286.27	2519.6	2456.87	3.39038	0.0608304	3	549	2223.83	2253.48	2133.74	2203.68	3.34315	0.0282993	3	614	0.896948	-0.156903	0.0536518
Q9VE94	5	2	22.9347	3.6435e-05	4.43848	0.00040248	1.75212	1	Experimental_No_Manganese	Control_Manganese	43824.3	LD14127p OS=Drosophila melanogaster OX=7227 GN=CK01205 PE=1 SV=1	2459.41	2340.48	2497.94	2432.61	3.38607	0.0337424	3	550	4405.16	4112.11	4269.38	4262.22	3.62964	0.0344086	3	318	1.75212	0.8091	4.65889e-05
Q7K8X7	10	7	39.0265	0.00199401	2.70027	0.00357788	1.17539	0.999151	Experimental_No_Manganese	Control_Manganese	25109.9	Glutathione S transferase E9 OS=Drosophila melanogaster OX=7227 GN=GstE9 PE=1 SV=1	2342.11	2407.89	2529.76	2426.59	3.385	0.0392363	3	551	2853.45	2844.89	2858.24	2852.19	3.45518	0.00237135	3	488	1.17539	0.233142	0.00151337
P48588	6	3	26.7912	0.0163365	1.78684	0.0145463	1.08291	0.840738	Control_Manganese	Experimental_No_Manganese	13201.5	40S ribosomal protein S25 OS=Drosophila melanogaster OX=7227 GN=RpS25 PE=1 SV=3	2445.8	2361.41	2468.23	2425.14	3.38474	0.0232249	3	552	2280.65	2263.2	2174.54	2239.46	3.35014	0.0254072	3	606	0.923434	-0.114919	0.0159029
Q0E9B6	4	3	14.0439	0.015088	1.82137	0.0138772	1.16175	0.856375	Experimental_No_Manganese	Control_Manganese	18276.4	40S ribosomal protein S11 OS=Drosophila melanogaster OX=7227 GN=RpS11 PE=1 SV=1	2415.99	2417.43	2440.09	2424.5	3.38462	0.00557459	3	553	2616.16	2921.17	2912.64	2816.66	3.44973	0.0616631	3	495	1.16175	0.216295	0.0175571
Q7K148	6	2	34.0262	0.648903	0.18782	0.198631	1.05634	0.0672419	Experimental_No_Manganese	Control_Manganese	31446.6	Proteasome subunit beta OS=Drosophila melanogaster OX=7227 GN=Prosbeta5 PE=1 SV=1	2674.72	1888.6	2693.46	2418.93	3.38362	0.189906	3	554	2857.82	2452.79	2355.05	2555.22	3.40743	0.104326	3	542	1.05634	0.0790796	0.679691
Q9VHS2;A0A0B4K6C3	10	8	43.4425	0.541319	0.266547	0.175221	1.02306	0.0818866	Control_Manganese	Experimental_No_Manganese	9901.68	Cytochrome c oxidase subunit 7A_ mitochondrial OS=Drosophila melanogaster OX=7227 GN=COX7A PE=3 SV=1	2359.07	2321.17	2542.1	2407.45	3.38156	0.0490747	3	555	2325.42	2295.46	2438.69	2353.19	3.37166	0.0321042	3	586	0.977462	-0.0328871	0.539463
Q27594	2	1	9.1129	0.10704	0.970453	0.0530981	1.08956	0.355432	Control_Manganese	Experimental_No_Manganese	58461.4	Cytochrome P450 6a9 OS=Drosophila melanogaster OX=7227 GN=Cyp6a9 PE=2 SV=3	2452.81	2344.64	2423.16	2406.87	3.38145	0.0232248	3	556	2287.14	2303.17	2036.76	2209.02	3.3442	0.0676292	3	613	0.917798	-0.123751	0.0981616
Q9VJY6;X2JE06	7	7	21.0272	0.191427	0.717997	0.0817787	1.07163	0.228899	Experimental_No_Manganese	Control_Manganese	17634	60S ribosomal protein L24 OS=Drosophila melanogaster OX=7227 GN=RpL24 PE=1 SV=1	2399.98	2314.91	2466	2393.63	3.37906	0.0316429	3	559	2751.09	2403.28	2540.87	2565.08	3.4091	0.0682872	3	541	1.07163	0.0998033	0.19467
Q9VET9	9	3	59.954	0.824817	0.0836425	0.234997	1.00488	0.0539706	Control_Manganese	Experimental_No_Manganese	35196.8	AT03047p OS=Drosophila melanogaster OX=7227 GN=Decay PE=1 SV=1	2456.13	2401.42	2323.22	2393.59	3.37905	0.0279083	3	560	2400.05	2326.53	2419.34	2381.97	3.37694	0.0205593	3	580	0.995148	-0.00701762	0.820046
Q7JYK2	8	5	35.7562	0.000584331	3.23334	0.00182171	1.52464	0.999999	Experimental_No_Manganese	Control_Manganese	40169	RE04845p OS=Drosophila melanogaster OX=7227 GN=Dmel\CG1941 PE=1 SV=1	2577.13	2302.82	2275.66	2385.2	3.37753	0.0699177	3	561	3743.42	3623.32	3543.01	3636.58	3.56069	0.0277354	3	394	1.52464	0.608471	0.000371978
P22700;A0A0B4LGB7;P22700-2	29	21	152.328	0.049821	1.30259	0.0306688	1.08698	0.557873	Experimental_No_Manganese	Control_Manganese	112557	Calcium-transporting ATPase sarcoplasmic/endoplasmic reticulum type OS=Drosophila melanogaster OX=7227 GN=Ca-P60A PE=1 SV=2	2461.8	2245.37	2382.94	2363.37	3.37353	0.0463467	3	564	2628.35	2507.2	2571.25	2568.93	3.40975	0.0235936	3	539	1.08698	0.120322	0.0466734
P19351;M9NH07;M9PHJ0;M9PHR2;M9PJM6;P19351-10;P19351-12;P19351-2;P19351-3;P19351-4;P19351-5;P19351-6;P19351-7;P19351-8;X2JBP9;B9EQV5;E1JJP0;P19351-11;P19351-13;P19351-9	18	15	74.6914	0.00287653	2.54113	0.00451572	1.12839	0.996529	Control_Manganese	Experimental_No_Manganese	47448	Troponin T_ skeletal muscle OS=Drosophila melanogaster OX=7227 GN=up PE=1 SV=3	2321.33	2427.99	2317.85	2355.72	3.37212	0.0265785	3	565	2049.97	2086.67	2126.43	2087.69	3.31967	0.018317	3	635	0.886219	-0.174265	0.0031919
P40301	7	6	24.0259	0.0310122	1.50847	0.0225989	1.07087	0.688085	Experimental_No_Manganese	Control_Manganese	26020.6	Proteasome subunit alpha type-2 OS=Drosophila melanogaster OX=7227 GN=Prosalpha2 PE=1 SV=1	2272.04	2385.29	2406.52	2354.62	3.37192	0.0307047	3	566	2498.3	2577.54	2488.62	2521.49	3.40166	0.0193464	3	552	1.07087	0.0987806	0.0295475
Q9VIX4	11	6	53.5903	0.466202	0.331426	0.157916	1.02111	0.0965519	Control_Manganese	Experimental_No_Manganese	77978.7	Acyl-coenzyme A oxidase OS=Drosophila melanogaster OX=7227 GN=Dmel\CG17544 PE=1 SV=2	2368.4	2230.85	2416.64	2338.63	3.36896	0.0412239	3	568	2297.94	2255.38	2317.56	2290.29	3.35989	0.0138786	3	596	0.979331	-0.0301316	0.455855
Q7JYW9	7	5	39.4548	0.000477082	3.32141	0.00162616	1.58947	1	Experimental_No_Manganese	Control_Manganese	51422.7	Phosphotransferase OS=Drosophila melanogaster OX=7227 GN=Hex-C PE=1 SV=1	2162.08	2463.24	2358.9	2328.07	3.367	0.065688	3	569	3732.48	3543.16	3825.55	3700.4	3.56825	0.0388894	3	384	1.58947	0.668543	0.000347221
A1ZBJ2	29	23	122.311	0.0146322	1.83469	0.0136153	1.17374	0.862176	Experimental_No_Manganese	Control_Manganese	68709.9	Uncharacterized protein_ isoform B OS=Drosophila melanogaster OX=7227 GN=cg7461 PE=1 SV=2	2362.99	2281.47	2332.83	2325.76	3.36657	0.0177226	3	570	2925.58	2685.19	2578.78	2729.85	3.43614	0.0650798	3	510	1.17374	0.231116	0.018497
Q9VJZ6	5	3	25.8088	0.0221335	1.65495	0.0178021	1.11701	0.773605	Control_Manganese	Experimental_No_Manganese	23745.1	LD40224p OS=Drosophila melanogaster OX=7227 GN=Grx4 PE=1 SV=1	2337.74	2315.47	2291.67	2314.96	3.36454	0.00995109	3	571	2086.55	2172.38	1958.46	2072.46	3.31649	0.0519431	3	637	0.895249	-0.159639	0.0188548
Q9VUW2	2	1	8.3575	0.915613	0.038288	0.255101	1.00258	0.0509042	Control_Manganese	Experimental_No_Manganese	31422.8	Inositol-1-monophosphatase OS=Drosophila melanogaster OX=7227 GN=Dmel\CG17029 PE=1 SV=1	2235.4	2311.85	2390.33	2312.53	3.36409	0.0334988	3	572	2727.8	2066.93	2124.99	2306.58	3.36297	0.158652	3	592	0.997427	-0.00371648	0.979341
Q961Q8	26	22	138.114	0.0530951	1.27495	0.0320286	1.20837	0.540193	Experimental_No_Manganese	Control_Manganese	46198.3	GH10454p OS=Drosophila melanogaster OX=7227 GN=Dmel\CG10562 PE=1 SV=1	2309.35	2328.36	2297.04	2311.59	3.36391	0.006826	3	573	3119.18	2794.29	2466.3	2793.25	3.44611	0.116868	3	500	1.20837	0.273065	0.0631249
Q9V419	16	10	93.8416	0.0420036	1.37671	0.0277643	1.28049	0.605327	Control_Manganese	Experimental_No_Manganese	58161.2	Probable cytochrome P450 28a5 OS=Drosophila melanogaster OX=7227 GN=Cyp28a5 PE=2 SV=1	2030.9	2393.31	2510.07	2311.43	3.36388	0.108098	3	574	1659.99	1764.8	1990.52	1805.11	3.2565	0.0935749	3	698	0.780949	-0.3567	0.0437771
Q9VAR7	3	2	13.2101	0.412063	0.385036	0.144325	1.27159	0.110346	Control_Manganese	Experimental_No_Manganese	52653.7	Uncharacterized protein OS=Drosophila melanogaster OX=7227 GN=Dmel\CG11828 PE=4 SV=5	3252.98	2059.96	1608.23	2307.06	3.36306	0.368331	3	575	2135.56	1656.65	1650.72	1814.31	3.25871	0.153351	3	692	0.786418	-0.346631	0.393885
A4V4U5;M9NFJ2;M9NHG9;Q04499;Q04499-2;Q04499-3;Q04499-5	4	2	22.0035	0.295234	0.529833	0.113908	1.05342	0.154971	Experimental_No_Manganese	Control_Manganese	76465.4	Proline dehydrogenase OS=Drosophila melanogaster OX=7227 GN=slgA PE=1 SV=1	2258.75	2418.1	2220.19	2299.01	3.36154	0.0456364	3	576	2310.65	2585.21	2369.64	2421.83	3.38414	0.0596785	3	571	1.05342	0.0750872	0.299443
Q9W0N8	6	4	34.4234	0.0455488	1.34152	0.029236	1.13668	0.582815	Experimental_No_Manganese	Control_Manganese	49582.3	GH21114p OS=Drosophila melanogaster OX=7227 GN=hiro PE=1 SV=1	2280.82	2367.38	2248.44	2298.88	3.36152	0.0267489	3	577	2401.77	2706.62	2730.89	2613.09	3.41715	0.0701901	3	532	1.13668	0.184826	0.048154
P46150;C7LAH9;M9NG50;P46150-2;P46150-3;P46150-4;P46150-5	26	8	108.89	0.00113668	2.94436	0.00256832	1.33834	0.999948	Experimental_No_Manganese	Control_Manganese	68255.5	Moesin/ezrin/radixin homolog 1 OS=Drosophila melanogaster OX=7227 GN=Moe PE=1 SV=2	2253.99	2442.76	2193.15	2296.63	3.36109	0.0566725	3	578	3120.64	2990.68	3109.73	3073.68	3.48766	0.0234548	3	465	1.33834	0.420447	0.000827575
Q9W5B5	10	6	54.4546	0.452056	0.344808	0.154463	1.0219	0.0998551	Control_Manganese	Experimental_No_Manganese	47309.5	Uncharacterized protein OS=Drosophila melanogaster OX=7227 GN=Dmel\CG14630 PE=4 SV=2	2256.95	2284.41	2343.08	2294.81	3.36075	0.0191732	3	580	2142.31	2323.7	2270.86	2245.63	3.35134	0.0415432	3	603	0.978566	-0.0312591	0.455239
Q8SXR4	4	2	22.6467	0.028743	1.54147	0.0214714	1.20987	0.708123	Experimental_No_Manganese	Control_Manganese	35793.1	RE54230p OS=Drosophila melanogaster OX=7227 GN=Dmel\CG30339 PE=2 SV=1	2263.38	2103.66	2513.84	2293.63	3.36052	0.0901428	3	581	2737.06	2675.35	2912.54	2774.99	3.44326	0.0443452	3	507	1.20987	0.27485	0.0256959
Q9VKF6	23	16	110.407	0.595954	0.224787	0.187884	1.01616	0.0736697	Control_Manganese	Experimental_No_Manganese	93680.6	V-type proton ATPase subunit a OS=Drosophila melanogaster OX=7227 GN=Vha100-5 PE=1 SV=1	2329.88	2177.59	2356.76	2288.08	3.35947	0.0422272	3	582	2280.62	2272.06	2202.38	2251.69	3.35251	0.0190589	3	601	0.984096	-0.0231294	0.583149
Q9I7J0	5	4	32.7024	0.0590097	1.22908	0.0344276	1.1109	0.511002	Experimental_No_Manganese	Control_Manganese	19172.8	GH21596p OS=Drosophila melanogaster OX=7227 GN=Dmel\CG5023 PE=1 SV=1	2352.88	2165.06	2344.62	2287.52	3.35936	0.0463957	3	583	2404.01	2558.81	2660.78	2541.2	3.40504	0.0508782	3	545	1.1109	0.151726	0.0583836
Q9VY92	12	8	45.8241	0.52765	0.277654	0.172143	1.03581	0.0842361	Control_Manganese	Experimental_No_Manganese	12509.7	GEO07753p1 OS=Drosophila melanogaster OX=7227 GN=Dmel\CG11151 PE=1 SV=1	2126.99	2277.39	2421.51	2275.3	3.35704	0.0647257	3	584	2050.13	2269.09	2270.68	2196.64	3.34176	0.0577597	3	615	0.965429	-0.0507575	0.522009
Q9W0P5;M9ND19	12	10	63.3899	0.0735465	1.13344	0.0403209	1.07992	0.451258	Control_Manganese	Experimental_No_Manganese	39096.1	UDP-glucose 4-epimerase OS=Drosophila melanogaster OX=7227 GN=Gale PE=1 SV=1	2167.69	2296.04	2354.71	2272.82	3.35656	0.0420845	3	585	2021.19	2159.51	2133.12	2104.61	3.32317	0.0348935	3	631	0.925991	-0.11093	0.0730778
Q9VQD2	2	2	10.0159	0.00015756	3.80255	0.000852877	1.41592	1	Experimental_No_Manganese	Control_Manganese	57647.7	Probable cytochrome P450 309a1 OS=Drosophila melanogaster OX=7227 GN=Cyp309a1 PE=1 SV=4	2281.71	2179.23	2350.9	2270.61	3.35614	0.0380383	3	586	3202.68	3287.64	3154.67	3215	3.50718	0.0209453	3	450	1.41592	0.501735	0.000117058
P52029	18	8	109.425	0.0403313	1.39436	0.0270416	1.09241	0.616579	Experimental_No_Manganese	Control_Manganese	62624.3	Glucose-6-phosphate isomerase OS=Drosophila melanogaster OX=7227 GN=Pgi PE=2 SV=2	2181.22	2261.56	2326.22	2256.33	3.3534	0.0321954	3	587	2557.95	2363.71	2472.88	2464.84	3.39179	0.0395028	3	566	1.09241	0.127516	0.0410267
P61209;M9PG22	10	6	60.0039	0.00805233	2.09408	0.00925765	1.18509	0.947907	Experimental_No_Manganese	Control_Manganese	20744.8	ADP-ribosylation factor 1 OS=Drosophila melanogaster OX=7227 GN=Arf79F PE=1 SV=2	2384.45	2147.71	2229.57	2253.91	3.35294	0.0533434	3	588	2750.26	2596.75	2666.26	2671.09	3.42669	0.0287786	3	519	1.18509	0.244998	0.00716324
Q9VZQ8;Q8IRD3;Q8IRD4	9	7	31.8006	0.00482067	2.31689	0.00640189	1.10249	0.983567	Control_Manganese	Experimental_No_Manganese	18847.5	Glutathione peroxidase OS=Drosophila melanogaster OX=7227 GN=PHGPx PE=1 SV=1	2238.31	2200.28	2319.79	2252.79	3.35272	0.0271018	3	589	2020.16	2071.51	2038.43	2043.37	3.31035	0.0127362	3	642	0.907037	-0.140767	0.00545076
A1Z7F3	17	11	88.7173	0.00333206	2.47729	0.00499035	1.13999	0.994338	Control_Manganese	Experimental_No_Manganese	67194.3	Maltase A8 OS=Drosophila melanogaster OX=7227 GN=Mal-A8 PE=4 SV=1	2166.42	2260.99	2319.79	2249.07	3.352	0.034404	3	590	1978.13	1949.61	1990.91	1972.88	3.2951	0.0107171	3	655	0.8772	-0.189022	0.00396995
Q9VNE9	10	5	32.6523	0.200945	0.696922	0.0847563	1.04463	0.219727	Control_Manganese	Experimental_No_Manganese	23818.1	60S ribosomal protein L13a OS=Drosophila melanogaster OX=7227 GN=RpL13A PE=1 SV=1	2163.7	2330.28	2220.31	2238.1	3.34988	0.0378444	3	592	2090.95	2115.99	2220.5	2142.48	3.33092	0.0320736	3	625	0.957277	-0.0629916	0.203516
Q9V3P6;A0A0B4KHE9;A0A0B4KI10;Q9V3P6-2	12	4	57.2484	2.40952e-05	4.61807	0.00033638	1.80987	1	Experimental_No_Manganese	Control_Manganese	113826	26S proteasome non-ATPase regulatory subunit 1 OS=Drosophila melanogaster OX=7227 GN=Rpn2 PE=1 SV=1	2280.8	2185.03	2238.41	2234.75	3.34923	0.0214738	3	593	4229.35	3906.99	3997.48	4044.61	3.60688	0.0411083	3	340	1.80987	0.855889	5.46107e-05
P35421	5	2	21.7334	0.023445	1.62995	0.0185064	1.19913	0.759709	Experimental_No_Manganese	Control_Manganese	149625	Phosphoribosylformylglycinamidine synthase OS=Drosophila melanogaster OX=7227 GN=ade2 PE=2 SV=2	2330.29	2026	2344.99	2233.76	3.34904	0.0806146	3	594	2748.36	2708.13	2579.22	2678.57	3.4279	0.0329879	3	517	1.19913	0.261988	0.0184447
Q9VG31;Q9VG32;Q2QBM1	15	12	78.236	0.00112556	2.94863	0.00255798	1.3602	0.999951	Experimental_No_Manganese	Control_Manganese	85538.4	Malic enzyme OS=Drosophila melanogaster OX=7227 GN=Men PE=1 SV=1	2100.34	2217.41	2374.24	2230.67	3.34843	0.0616095	3	595	2973.9	3046.64	3081.91	3034.15	3.48204	0.0181519	3	468	1.3602	0.443817	0.000713874
Q9V8R9;A0A0B4LFX4;A0A0B4LG23	10	3	37.8447	0.0356894	1.44746	0.0249566	1.14092	0.650195	Control_Manganese	Experimental_No_Manganese	184567	Protein 4.1 homolog OS=Drosophila melanogaster OX=7227 GN=cora PE=1 SV=1	2341.29	2107.96	2221.02	2223.42	3.34702	0.0524802	3	596	2003.41	1835.56	2007.46	1948.81	3.28977	0.0503372	3	661	0.876489	-0.190192	0.0355197
Q9VL69	2	2	4.6594	0.538616	0.268721	0.174868	1.0226	0.0823411	Experimental_No_Manganese	Control_Manganese	21635.9	LD05267p OS=Drosophila melanogaster OX=7227 GN=Dmel\CG5885 PE=1 SV=1	2089.25	2291.52	2280.6	2220.46	3.34644	0.0512313	3	597	2321.21	2291.88	2198.79	2270.63	3.35615	0.02815	3	597	1.0226	0.0322377	0.541835
Q9VD58	10	7	68.0401	0.0439711	1.35683	0.0284727	1.10854	0.592617	Experimental_No_Manganese	Control_Manganese	40723.8	GH26270p OS=Drosophila melanogaster OX=7227 GN=Idh3b PE=1 SV=1	2376.61	2137.43	2139.83	2217.96	3.34595	0.0619493	3	598	2424.48	2467.81	2483.81	2458.7	3.39071	0.0124842	3	567	1.10854	0.148665	0.0414814
Q9VK69	10	8	49.349	0.121865	0.914119	0.0588023	1.09378	0.324659	Control_Manganese	Experimental_No_Manganese	57800.6	T-complex protein 1 subunit delta OS=Drosophila melanogaster OX=7227 GN=CCT4 PE=1 SV=1	2100.73	2135.16	2366.14	2200.68	3.34256	0.0655837	3	599	2114.42	1938.78	1982.8	2012	3.30363	0.0454209	3	648	0.914263	-0.129318	0.128296
E1JJQ3;E1JJQ4;Q8IQW7;Q9XYP7;Q9XYP7-2;X2JG40	6	2	27.8631	3.63264e-07	6.43978	4.58732e-05	4.76766	1	Experimental_No_Manganese	Control_Manganese	103981	Gamma-tubulin complex component OS=Drosophila melanogaster OX=7227 GN=Grip84 PE=1 SV=1	2284.59	2157.6	2155.78	2199.32	3.34229	0.0335774	3	600	10739.2	10192	10525.6	10485.6	4.02059	0.0263008	3	83	4.76766	2.25328	9.36961e-07
Q9VE75	26	19	122.476	0.0138961	1.85711	0.0131534	1.15347	0.871637	Experimental_No_Manganese	Control_Manganese	95761.6	V-type proton ATPase subunit a OS=Drosophila melanogaster OX=7227 GN=Vha100-2 PE=1 SV=2	2164.89	2221.08	2201.69	2195.89	3.34161	0.0129972	3	601	2672.04	2383.78	2542.82	2532.88	3.40361	0.0570043	3	548	1.15347	0.205975	0.0165962
Q99323;Q99323-1;Q99323-2;Q99323-4	25	1	108.09	0.376633	0.424082	0.136103	1.01703	0.121326	Experimental_No_Manganese	Control_Manganese	237557	Myosin heavy chain_ non-muscle OS=Drosophila melanogaster OX=7227 GN=zip PE=1 SV=2	2220.92	2131.44	2232.83	2195.07	3.34145	0.0252466	3	602	2271.55	2218.16	2207.62	2232.45	3.34878	0.0153522	3	609	1.01703	0.0243608	0.376651
P18432	10	7	72.1627	0.0161953	1.79061	0.0144535	1.25906	0.842487	Control_Manganese	Experimental_No_Manganese	23714.5	Myosin regulatory light chain 2 OS=Drosophila melanogaster OX=7227 GN=Mlc2 PE=1 SV=2	2283.3	2198.29	2090.79	2190.79	3.3406	0.0440372	3	603	1923.5	1674.16	1622.4	1740.02	3.24055	0.092525	3	714	0.794242	-0.332349	0.0141467
P50882;X2JDU0	11	10	48.8064	0.00359039	2.44486	0.00519864	1.13416	0.992848	Experimental_No_Manganese	Control_Manganese	21563.1	60S ribosomal protein L9 OS=Drosophila melanogaster OX=7227 GN=RpL9 PE=1 SV=2	2233.83	2158.57	2156.78	2183.06	3.33907	0.0201468	3	604	2521.39	2392.87	2513.54	2475.93	3.39374	0.0290975	3	563	1.13416	0.18162	0.00385943
M9PEP5;M9PEY1;M9PF46;M9PHW7;Q9VT32;Q9VT33	5	2	23.6296	0.0912061	1.03998	0.0469103	1.08226	0.395179	Control_Manganese	Experimental_No_Manganese	40970	Uncharacterized protein_ isoform F OS=Drosophila melanogaster OX=7227 GN=Dmel\CG6767 PE=1 SV=1	2140.21	2122.01	2285.55	2182.59	3.33897	0.0410671	3	605	2123.98	1984.45	1941.67	2016.7	3.30464	0.0472737	3	647	0.923995	-0.114043	0.0930936
Q9VHL2	13	6	73.6912	0.0100842	1.99636	0.0107115	1.16945	0.921712	Control_Manganese	Experimental_No_Manganese	60014.1	T-complex protein 1 subunit eta OS=Drosophila melanogaster OX=7227 GN=CCT7 PE=1 SV=2	2281.28	2157.41	2074.62	2171.1	3.33668	0.0479054	3	607	1917.11	1862.65	1789.8	1856.52	3.2687	0.0344084	3	685	0.855104	-0.225829	0.0111253
A1Z8U4;Q7KKI0	11	7	59.7235	0.00295763	2.52906	0.00458776	1.2119	0.996181	Experimental_No_Manganese	Control_Manganese	56305.3	Chaperonin containing TCP1 subunit 5_ isoform B OS=Drosophila melanogaster OX=7227 GN=CCT5 PE=1 SV=1	2163.98	2081.66	2254.22	2166.62	3.33578	0.0398374	3	608	2553.93	2721.88	2601.37	2625.73	3.41925	0.0329748	3	529	1.2119	0.277269	0.00288288
Q9U4L6;M9PGL7	8	5	38.5681	0.00615947	2.21046	0.00764348	1.06598	0.970249	Experimental_No_Manganese	Control_Manganese	36564.4	Mitochondrial import receptor subunit TOM40 homolog 1 OS=Drosophila melanogaster OX=7227 GN=Tom40 PE=2 SV=2	2213.47	2129.34	2152.36	2165.06	3.33547	0.0200817	3	609	2291.23	2318.63	2313.83	2307.9	3.36322	0.00634139	3	591	1.06598	0.0921744	0.00571856
Q9XYN7	4	4	27.0548	0.011776	1.929	0.0118333	1.15107	0.899379	Experimental_No_Manganese	Control_Manganese	23633.2	Proteasome subunit beta type-3 OS=Drosophila melanogaster OX=7227 GN=Prosbeta3 PE=1 SV=1	2297.71	2114.6	2075.25	2162.52	3.33496	0.0548992	3	610	2482.65	2459.11	2525.86	2489.21	3.39606	0.0135994	3	559	1.15107	0.202973	0.0101568
Q9W3N9	11	9	41.3966	0.026985	1.56888	0.0204028	1.10985	0.724465	Control_Manganese	Experimental_No_Manganese	43812.3	LD24105p OS=Drosophila melanogaster OX=7227 GN=Dmel\CG10932 PE=1 SV=1	2237.24	2083.95	2108.3	2143.16	3.33106	0.0384378	3	611	2013.62	1893.82	1885.67	1931.04	3.28579	0.037098	3	667	0.901021	-0.150367	0.0281599
P35220	4	1	17.1173	0.463272	0.334164	0.157333	1.17776	0.0972201	Experimental_No_Manganese	Control_Manganese	103243	Catenin alpha OS=Drosophila melanogaster OX=7227 GN=alpha-Cat PE=1 SV=2	1210.76	2541.86	2646.98	2133.2	3.32903	0.375296	3	613	2196.75	2454.96	2885.5	2512.41	3.40009	0.138493	3	554	1.17776	0.236049	0.493659
Q9VAN0	13	10	57.6762	0.0112349	1.94943	0.0114366	1.08852	0.906526	Experimental_No_Manganese	Control_Manganese	39711.5	Probable phosphoserine aminotransferase OS=Drosophila melanogaster OX=7227 GN=CG11899 PE=2 SV=1	2119.51	2187.09	2090.34	2132.31	3.32885	0.0232738	3	614	2261.51	2367.82	2333.88	2321.07	3.36569	0.0233944	3	590	1.08852	0.122368	0.0112965
Q9W402	7	6	27.361	0.0745504	1.12755	0.0406433	1.09008	0.447648	Control_Manganese	Experimental_No_Manganese	17804.6	NADH dehydrogenase (Ubiquinone) B16.6 subunit_ isoform A OS=Drosophila melanogaster OX=7227 GN=ND-B16.6 PE=1 SV=1	2268.92	2078.74	2016.69	2121.45	3.32663	0.0619527	3	615	1951.68	1952	1934.72	1946.14	3.28917	0.0050802	3	663	0.917361	-0.124439	0.0825846
Q9VEF0	2	1	8.586	0.67395	0.171372	0.203773	1.02765	0.064651	Experimental_No_Manganese	Control_Manganese	51448.7	LD33778p OS=Drosophila melanogaster OX=7227 GN=Odj PE=1 SV=2	2299.28	2165.16	1889.24	2117.89	3.3259	0.0987136	3	616	2151.28	2301.89	2076.18	2176.45	3.33775	0.0528113	3	619	1.02765	0.0393498	0.692604
Q8IRQ5;Q9W3X6	13	10	56.0886	0.0576813	1.23897	0.0340079	1.08411	0.517274	Control_Manganese	Experimental_No_Manganese	50745	LP02262p OS=Drosophila melanogaster OX=7227 GN=Fum1 PE=1 SV=1	2180.66	2031.33	2132.79	2114.93	3.3253	0.0360544	3	617	1872.99	2023.35	1956.18	1950.84	3.29022	0.0386108	3	660	0.922414	-0.116514	0.056884
A1Z843	25	12	127.529	0.000602991	3.21969	0.00182717	1.14078	0.999999	Control_Manganese	Experimental_No_Manganese	131803	Uncharacterized protein OS=Drosophila melanogaster OX=7227 GN=Dmel\CG1371 PE=1 SV=1	2120.6	2063.18	2148.95	2110.91	3.32447	0.0207013	3	618	1868.97	1830.7	1851.57	1850.41	3.26727	0.0103556	3	688	0.876594	-0.190019	0.000697618
Q9W0B8	10	7	49.5682	0.0307931	1.51155	0.0224987	1.08594	0.68997	Control_Manganese	Experimental_No_Manganese	141040	Coatomer subunit alpha OS=Drosophila melanogaster OX=7227 GN=alphaCOP PE=1 SV=1	2105.17	2135.02	2080.22	2106.8	3.32362	0.013022	3	619	2018.19	1945.95	1856.1	1940.08	3.28782	0.0418571	3	665	0.920864	-0.118939	0.0280703
Q9VRS4	5	4	29.9608	0.000887296	3.05193	0.00218711	1.35131	0.999989	Control_Manganese	Experimental_No_Manganese	28637.9	Machete OS=Drosophila melanogaster OX=7227 GN=yip7 PE=1 SV=1	2195.81	2082.66	2029.94	2102.8	3.3228	0.0403014	3	620	1497.78	1629.67	1540.94	1556.13	3.19205	0.0432114	3	762	0.740025	-0.434354	0.000939152
P36188-2;M9NH88;M9PJQ5;P36188-3;M9NFC0;P36188-4;P36188-8;P36188-5;P36188-9	8	4	46.8904	0.0023795	2.62351	0.00404405	1.22085	0.998265	Experimental_No_Manganese	Control_Manganese	23574.5	Isoform 1 of Troponin I OS=Drosophila melanogaster OX=7227 GN=wupA	2035.53	2154.52	2072.02	2087.36	3.3196	0.0292035	3	621	2667.6	2512.04	2465.44	2548.36	3.40626	0.0415417	3	544	1.22085	0.28789	0.0028308
P42279	4	1	24.782	0.184131	0.734874	0.0795309	1.25762	0.236405	Experimental_No_Manganese	Control_Manganese	28487	Trypsin eta OS=Drosophila melanogaster OX=7227 GN=etaTry PE=2 SV=2	2129.49	2050	2057.55	2079.01	3.31786	0.0211046	3	622	3330.61	2331.68	2181.52	2614.6	3.41741	0.238892	3	531	1.25762	0.330692	0.212585
Q7JR24	3	2	13.7467	0.00749014	2.12551	0.008766	1.08714	0.954841	Control_Manganese	Experimental_No_Manganese	26378.1	Cag_ isoform A OS=Drosophila melanogaster OX=7227 GN=cag PE=2 SV=1	2029.27	2103.82	2093.9	2075.66	3.31716	0.0195053	3	623	1956.52	1884.84	1886.5	1909.29	3.28087	0.0214272	3	673	0.919843	-0.12054	0.00745467
Q9VE01	21	11	110.663	0.00498875	2.30201	0.00649402	1.22875	0.982054	Control_Manganese	Experimental_No_Manganese	61583.6	Probable cytochrome P450 12a5_ mitochondrial OS=Drosophila melanogaster OX=7227 GN=Cyp12a5 PE=2 SV=1	1980.86	2022.54	2217.16	2073.52	3.31671	0.0608291	3	624	1647.82	1707.91	1706.79	1687.51	3.22725	0.0203714	3	730	0.813836	-0.29719	0.00691351
P24156;A0A023GQA5	13	10	43.6652	0.215241	0.667075	0.089033	1.05384	0.207121	Experimental_No_Manganese	Control_Manganese	30383.9	Protein l(2)37Cc OS=Drosophila melanogaster OX=7227 GN=l(2)37Cc PE=2 SV=2	2046.61	2041.35	2104.89	2064.28	3.31477	0.0170826	3	625	2159.06	2057.47	2309.72	2175.42	3.33754	0.058343	3	620	1.05384	0.0756542	0.217729
Q86BS3	8	2	34.6686	0.497733	0.303004	0.165527	1.02567	0.0898495	Control_Manganese	Experimental_No_Manganese	101338	Chromator_ isoform A OS=Drosophila melanogaster OX=7227 GN=Chro PE=1 SV=1	1955.66	2097.84	2118.9	2057.47	3.31333	0.043158	3	626	1946.09	2095.83	1976.02	2005.98	3.30233	0.0394999	3	650	0.974975	-0.0365632	0.495303
Q7KB18	3	1	16.6169	0.386892	0.41241	0.138113	1.09068	0.117962	Experimental_No_Manganese	Control_Manganese	52119.7	Epoxide hydrolase OS=Drosophila melanogaster OX=7227 GN=Jheh2 PE=1 SV=1	2280.93	1909.29	1978.44	2056.22	3.31307	0.0961238	3	627	2509.52	1977.37	2241.15	2242.68	3.35077	0.118644	3	604	1.09068	0.12523	0.385051
P41092;M9MRC9	7	3	40.4494	0.0173869	1.75978	0.0151157	1.06517	0.827888	Control_Manganese	Experimental_No_Manganese	17079.1	60S ribosomal protein L27a OS=Drosophila melanogaster OX=7227 GN=RpL27A PE=1 SV=2	2084.3	2052.07	2012.24	2049.54	3.31166	0.0176127	3	628	1877.22	1956.54	1938.68	1924.15	3.28424	0.0216239	3	670	0.938819	-0.0910813	0.0169194
P48605;A4V303	13	8	63.1118	0.050299	1.29844	0.0308927	1.27339	0.555218	Experimental_No_Manganese	Control_Manganese	59965.2	T-complex protein 1 subunit gamma OS=Drosophila melanogaster OX=7227 GN=CCT3 PE=2 SV=2	2086.1	1722.06	2329.85	2046.01	3.31091	0.149496	3	629	2556.6	2565.74	2693.73	2605.36	3.41587	0.0294275	3	535	1.27339	0.348673	0.0372055
Q9V3T2;X2JA11	2	2	12.1831	0.0111535	1.95259	0.0113834	1.15812	0.907603	Experimental_No_Manganese	Control_Manganese	33765.3	EG:BACR19J1.2 protein OS=Drosophila melanogaster OX=7227 GN=EG:BACR19J1.2 PE=1 SV=1	2046.46	2005.19	2085.68	2045.78	3.31086	0.0196745	3	630	2455.19	2425.56	2227.01	2369.26	3.37461	0.0523685	3	583	1.15812	0.211783	0.0126928
Q95TL8;Q9VXI3	8	4	44.0279	0.397106	0.401093	0.141186	1.06561	0.114767	Control_Manganese	Experimental_No_Manganese	47339.7	LD41494p OS=Drosophila melanogaster OX=7227 GN=CG9912 PE=1 SV=1	1895.47	2052.11	2158.86	2035.48	3.30867	0.0650855	3	631	1762.78	1835.4	2132.24	1910.14	3.28107	0.102475	3	672	0.938426	-0.0916855	0.410356
Q9W095	6	1	26.9232	0.0381197	1.41885	0.0260048	1.23982	0.632139	Experimental_No_Manganese	Control_Manganese	65215.4	FI03690p OS=Drosophila melanogaster OX=7227 GN=Gk2 PE=2 SV=2	2133.62	1972.73	1969.22	2025.19	3.30647	0.0463755	3	632	2683.91	2199.85	2648.88	2510.88	3.39983	0.107504	3	555	1.23982	0.310134	0.0422451
Q9VBP6	17	13	64.5611	0.146983	0.832734	0.0669633	1.07803	0.282693	Experimental_No_Manganese	Control_Manganese	55430.3	Succinate-semialdehyde dehydrogenase OS=Drosophila melanogaster OX=7227 GN=Ssadh PE=1 SV=1	1963.73	2101	1987.63	2017.45	3.3048	0.0363491	3	634	2077.53	2331.28	2115.84	2174.88	3.33744	0.0628954	3	621	1.07803	0.108403	0.153779
P36241	7	5	38.128	0.0285888	1.5438	0.0214084	1.11925	0.709527	Control_Manganese	Experimental_No_Manganese	24169.5	60S ribosomal protein L19 OS=Drosophila melanogaster OX=7227 GN=RpL19 PE=1 SV=2	2137.94	1952.46	1938.17	2009.52	3.30309	0.0554573	3	635	1760.34	1798.15	1827.78	1795.42	3.25417	0.0188289	3	702	0.893457	-0.16253	0.0333977
Q9XZJ4;E1JGZ9	6	4	26.6939	0.0714827	1.1458	0.0395221	1.08387	0.458866	Experimental_No_Manganese	Control_Manganese	27504.3	Proteasome subunit alpha type-6 OS=Drosophila melanogaster OX=7227 GN=Prosalpha1 PE=1 SV=2	2068.85	1954.63	2004.88	2009.45	3.30308	0.0284888	3	636	2303.03	2106.44	2124.48	2177.98	3.33805	0.0498948	3	617	1.08387	0.116192	0.0762721
Q9V8M5;A0A0B4JCU8	21	12	106.97	0.000363248	3.4398	0.0013653	1.33614	1	Control_Manganese	Experimental_No_Manganese	34282.4	Probable 3-hydroxyisobutyrate dehydrogenase_ mitochondrial OS=Drosophila melanogaster OX=7227 GN=CG15093 PE=2 SV=2	1976.39	2018.5	2024.48	2006.45	3.30243	0.0130606	3	637	1453.21	1575.84	1475.99	1501.68	3.17658	0.0434352	3	776	0.748424	-0.418072	0.000240261
P84029;X2J6D4	8	5	45.0911	0.000926634	3.03309	0.00224152	1.30249	0.999985	Control_Manganese	Experimental_No_Manganese	11848.7	Cytochrome c-2 OS=Drosophila melanogaster OX=7227 GN=Cyt-c-p PE=1 SV=2	1920.9	2102.74	1987.56	2003.74	3.30184	0.0459111	3	638	1552.16	1567.65	1495.36	1538.39	3.18707	0.0247402	3	768	0.767762	-0.381269	0.00126519
Q9VMT5;Q9VMT6	11	9	66.307	0.00631127	2.19988	0.00773365	1.39409	0.968582	Experimental_No_Manganese	Control_Manganese	57784.4	Probable cytochrome P450 28d1 OS=Drosophila melanogaster OX=7227 GN=Cyp28d1 PE=2 SV=1	2242.31	1861.28	1904.57	2002.72	3.30162	0.104168	3	639	2934.68	2710.63	2730.61	2791.97	3.44591	0.0444085	3	501	1.39409	0.479323	0.00488708
P25843;M9NEU5	3	3	14.4768	0.263941	0.578494	0.104532	1.04086	0.172366	Control_Manganese	Experimental_No_Manganese	13951.6	Profilin OS=Drosophila melanogaster OX=7227 GN=chic PE=1 SV=1	1926.47	2082.21	1970.62	1993.1	3.29953	0.0402742	3	640	1931.9	1841.06	1971.6	1914.85	3.28214	0.0349484	3	671	0.960742	-0.0577793	0.264448
P23696;X2JDI1	5	4	27.9618	0.0350716	1.45504	0.0247014	1.15326	0.654955	Experimental_No_Manganese	Control_Manganese	36039.3	Serine/threonine-protein phosphatase PP2A OS=Drosophila melanogaster OX=7227 GN=mts PE=2 SV=1	2131	2016.47	1830.16	1992.54	3.29941	0.0762035	3	641	2269.13	2270.9	2353.69	2297.91	3.36133	0.0210273	3	595	1.15326	0.205712	0.0293959
Q9VGQ1	6	3	28.7341	0.0398838	1.3992	0.0269263	1.08747	0.619664	Experimental_No_Manganese	Control_Manganese	50209.3	GM01350p OS=Drosophila melanogaster OX=7227 GN=alpha-KGDHC PE=1 SV=1	1944.46	2062.04	1962.66	1989.72	3.29879	0.0318091	3	642	2083.74	2165.61	2241.91	2163.75	3.33521	0.0365556	3	623	1.08747	0.120971	0.0409163
Q9VU68;Q9VU68-2	8	2	33.5975	0.831902	0.079928	0.236498	1.01416	0.0536488	Experimental_No_Manganese	Control_Manganese	67063.2	Actin-interacting protein 1 OS=Drosophila melanogaster OX=7227 GN=flr PE=2 SV=1	1652.77	1926.73	2359.84	1979.78	3.29662	0.180074	3	643	1942.54	2111.6	1969.3	2007.82	3.30272	0.0452582	3	649	1.01416	0.0202874	0.901363
Q9VZZ6	3	2	13.5597	0.00340476	2.46791	0.00500338	1.47035	0.993937	Experimental_No_Manganese	Control_Manganese	16248.7	CG16985 protein OS=Drosophila melanogaster OX=7227 GN=BcDNA:RE30174 PE=1 SV=1	2154	1787.9	1991.05	1977.65	3.29615	0.0927433	3	644	3036.55	2950.99	2735.95	2907.83	3.46357	0.0532622	3	481	1.47035	0.556156	0.00256572
A0A0B4KHJ9;P09491;P09491-2	9	5	50.5213	0.000181442	3.74126	0.000908718	1.32765	1	Control_Manganese	Experimental_No_Manganese	32920.7	Tropomyosin 2_ isoform E OS=Drosophila melanogaster OX=7227 GN=Tm2 PE=1 SV=1	1954.29	1978.81	1986.31	1973.14	3.29516	0.00848719	3	645	1469.22	1443.14	1546.21	1486.19	3.17207	0.0360576	3	780	0.75321	-0.408875	0.00011441
A0A0B4KF06;Q0E993	6	4	26.1653	0.0479377	1.31932	0.0301693	1.13693	0.568592	Control_Manganese	Experimental_No_Manganese	120104	Valyl-tRNA synthetase_ isoform C OS=Drosophila melanogaster OX=7227 GN=ValRS PE=1 SV=1	2068.44	2000.33	1846.92	1971.9	3.29488	0.0575399	3	646	1795.68	1777.28	1630.23	1734.4	3.23915	0.0522843	3	716	0.879558	-0.185149	0.0472435
Q9VPN5	11	6	70.8727	0.0527907	1.27744	0.0319436	1.12446	0.541788	Experimental_No_Manganese	Control_Manganese	56040.4	LD03220p OS=Drosophila melanogaster OX=7227 GN=Stip1 PE=1 SV=1	1890.61	2027.87	1995.94	1971.47	3.29479	0.0364337	3	647	2382.73	2116.32	2151.48	2216.84	3.34574	0.0652882	3	612	1.12446	0.169236	0.0581657
Q94545	2	1	8.5132	0.00163504	2.78647	0.00316399	1.13698	0.999651	Experimental_No_Manganese	Control_Manganese	63913.7	Set1/Ash2 histone methyltransferase complex subunit ASH2 OS=Drosophila melanogaster OX=7227 GN=ash2 PE=1 SV=2	1954.01	2020.68	1923.34	1966.01	3.29359	0.0253117	3	648	2201.84	2269.61	2234.5	2235.32	3.34934	0.0151638	3	608	1.13698	0.185209	0.00149568
Q9VRD4	9	6	43.917	0.103246	0.986127	0.0515474	1.0913	0.364229	Control_Manganese	Experimental_No_Manganese	31813.6	Uncharacterized protein_ isoform A OS=Drosophila melanogaster OX=7227 GN=Dmel\CG1532 PE=1 SV=1	2120.56	1854.43	1910.26	1961.75	3.29264	0.0715372	3	649	1805.96	1790.89	1796.04	1797.63	3.2547	0.0042605	3	701	0.91634	-0.126045	0.113167
Q9VVK5	6	1	25.2114	0.214178	0.669226	0.0887812	1.12159	0.208014	Experimental_No_Manganese	Control_Manganese	63223.8	Adenosine deaminase-related growth factor A OS=Drosophila melanogaster OX=7227 GN=Adgf-A PE=1 SV=1	2121.15	1971.02	1765.74	1952.64	3.29062	0.0913732	3	650	2420.75	1994.28	2155.11	2190.05	3.34045	0.0983392	3	616	1.12159	0.16554	0.215422
Q76NR6;Q9VYR1	16	11	78.3886	0.00426461	2.37012	0.00585974	1.10871	0.988178	Experimental_No_Manganese	Control_Manganese	35474.5	Regucalcin_ isoform D OS=Drosophila melanogaster OX=7227 GN=regucalcin PE=1 SV=1	1905.18	2011.46	1919.27	1945.3	3.28899	0.0296728	3	651	2170.59	2163.67	2136.06	2156.77	3.3338	0.00847114	3	624	1.10871	0.14888	0.00376684
Q95028;B5RJQ0	8	6	40.3229	0.00429413	2.36712	0.00586904	1.23679	0.98795	Experimental_No_Manganese	Control_Manganese	35822.1	L-lactate dehydrogenase OS=Drosophila melanogaster OX=7227 GN=ImpL3 PE=2 SV=1	1906.11	2029.42	1892.01	1942.51	3.28836	0.0389154	3	652	2542.05	2322.83	2342.54	2402.48	3.38066	0.0504809	3	575	1.23679	0.306598	0.00507453
Q9VGZ3	31	19	156.888	0.291625	0.535175	0.112978	1.03137	0.156822	Experimental_No_Manganese	Control_Manganese	99091.8	Iron regulatory protein 1B OS=Drosophila melanogaster OX=7227 GN=Irp-1B PE=1 SV=1	1984.32	1854.16	1954.08	1930.86	3.28575	0.0352799	3	654	2046.79	1941.57	1985.94	1991.43	3.29917	0.0265265	3	653	1.03137	0.0445665	0.290441
Q9VY93;M9PEI9	5	5	26.4955	0.454047	0.342899	0.155008	1.07319	0.0993782	Control_Manganese	Experimental_No_Manganese	26296.2	Probable methylthioribulose-1-phosphate dehydratase OS=Drosophila melanogaster OX=7227 GN=CG11134 PE=2 SV=1	2128.26	1978.06	1668.24	1924.85	3.2844	0.12187	3	655	1920.67	1758.03	1702.04	1793.58	3.25372	0.0633203	3	703	0.931803	-0.101903	0.432241
Q9VSL2	7	5	34.0043	0.804839	0.094291	0.231579	1.00922	0.0549575	Experimental_No_Manganese	Control_Manganese	27779	Glutathione S transferase O3 OS=Drosophila melanogaster OX=7227 GN=GstO3 PE=1 SV=1	1884.52	1832.51	2047.54	1921.52	3.28365	0.058385	3	656	1988.75	1955.83	1873.12	1939.23	3.28763	0.0307201	3	666	1.00922	0.013237	0.821038
A1Z9B8	4	1	21.3834	0.00045632	3.34073	0.00159261	1.53651	1	Control_Manganese	Experimental_No_Manganese	36166.2	Uncharacterized protein OS=Drosophila melanogaster OX=7227 GN=Dmel\CG4734 PE=4 SV=1	1991.99	1808.14	1960.41	1920.18	3.28334	0.0511968	3	657	1202.48	1229.17	1317.47	1249.71	3.09681	0.0481588	3	850	0.650826	-0.619656	0.000545998
P48809;E1JHA4	6	5	27.8803	0.549671	0.259898	0.176987	1.022	0.0805126	Experimental_No_Manganese	Control_Manganese	44998	Heterogeneous nuclear ribonucleoprotein 27C OS=Drosophila melanogaster OX=7227 GN=Hrb27C PE=1 SV=2	1969.02	1830.37	1938.86	1912.75	3.28166	0.0381231	3	658	2052.23	1905.39	1906.85	1954.82	3.29111	0.0431559	3	658	1.022	0.0313934	0.549044
Q7KM15	3	3	19.9514	0.0454053	1.34289	0.0291919	1.18101	0.583692	Control_Manganese	Experimental_No_Manganese	17738.1	Transcription factor BTF3 OS=Drosophila melanogaster OX=7227 GN=bic PE=1 SV=1	2063.76	1902.53	1744.27	1903.52	3.27956	0.0839234	3	659	1706	1592.84	1536.5	1611.78	3.20731	0.0535574	3	746	0.846735	-0.240017	0.0496735
Q9VY04	20	10	95.1136	0.413581	0.383439	0.144559	1.19503	0.109914	Control_Manganese	Experimental_No_Manganese	71353.4	Uncharacterized protein_ isoform A OS=Drosophila melanogaster OX=7227 GN=fiz PE=3 SV=1	1391.29	2094.49	2200.99	1895.59	3.27775	0.232102	3	660	1236.15	1679.89	1842.65	1586.23	3.20037	0.197897	3	752	0.836799	-0.257047	0.377606
Q24208;A0A0B4KGP8;Q24208-2	9	6	35.9989	0.000185303	3.73212	0.000908718	1.33458	1	Experimental_No_Manganese	Control_Manganese	52112.1	Eukaryotic translation initiation factor 2 subunit 3 OS=Drosophila melanogaster OX=7227 GN=eIF2gamma PE=2 SV=1	1859.67	1891.05	1931.99	1894.24	3.27743	0.0191454	3	662	2442.77	2605.35	2535.9	2528.01	3.40278	0.0322699	3	550	1.33458	0.416386	0.000251308
Q9VL68	6	2	28.8459	0.368908	0.433082	0.134518	1.03859	0.123967	Control_Manganese	Experimental_No_Manganese	31165	RH73277p OS=Drosophila melanogaster OX=7227 GN=Dmel\CG4598 PE=1 SV=2	1996.38	1878.79	1803.54	1892.9	3.27713	0.0513449	3	663	1887.21	1747.54	1832.97	1822.57	3.26068	0.038632	3	691	0.962847	-0.0546222	0.367523
Q8IMT6	2	1	8.7641	0.00200453	2.69799	0.00357788	1.15259	0.999132	Control_Manganese	Experimental_No_Manganese	49871.6	FI01822p OS=Drosophila melanogaster OX=7227 GN=Dmel\CG31300 PE=2 SV=1	1966.22	1863.12	1847.6	1892.31	3.27699	0.0340718	3	664	1645.74	1648.22	1631.42	1641.79	3.21532	0.00552243	3	739	0.86761	-0.204881	0.00263361
Q9VVP4	2	1	10.3742	0.00167563	2.77582	0.00322656	1.13898	0.999608	Control_Manganese	Experimental_No_Manganese	68622.5	FI06132p OS=Drosophila melanogaster OX=7227 GN=Dmel\CG5103 PE=2 SV=1	1893.11	1916.76	1855.4	1888.42	3.2761	0.0163862	3	665	1679.42	1610.34	1684.23	1658	3.21958	0.0249367	3	733	0.87798	-0.18774	0.00150949
Q9VMR6	9	7	44.0361	0.975158	0.0109251	0.267102	1.00008	0.050078	Control_Manganese	Experimental_No_Manganese	65829.3	MIP06029p OS=Drosophila melanogaster OX=7227 GN=Dmel\CG12512 PE=1 SV=1	2052.5	1824.4	1779.04	1885.31	3.27538	0.0777333	3	667	1904.23	1930.48	1820.77	1885.16	3.27535	0.0303882	3	678	0.999918	-0.00011887	0.998718
Q9VRM8	2	1	9.5675	0.448063	0.348661	0.153771	1.04767	0.100824	Control_Manganese	Experimental_No_Manganese	58368.9	RE25175p OS=Drosophila melanogaster OX=7227 GN=Alp10 PE=1 SV=1	1797.53	1883.2	1971.88	1884.21	3.27513	0.0462687	3	668	1815.15	1947.09	1633.17	1798.47	3.2549	0.0876427	3	700	0.954497	-0.0671872	0.456019
Q9VBT2	11	5	47.471	7.13727e-05	4.14647	0.000490084	1.54798	1	Experimental_No_Manganese	Control_Manganese	49293.7	IP11926p OS=Drosophila melanogaster OX=7227 GN=Dmel\CG11893 PE=2 SV=1	1953.68	1791.18	1886.06	1876.98	3.27346	0.0434901	3	669	2936.99	2898.3	2881.25	2905.51	3.46322	0.00982856	3	482	1.54798	0.630383	3.28031e-05
Q7YU05	15	4	70.4639	0.268847	0.570496	0.105618	1.0501	0.169424	Control_Manganese	Experimental_No_Manganese	36351	Pyruvate dehydrogenase E1 component subunit alpha OS=Drosophila melanogaster OX=7227 GN=Pdha PE=1 SV=1	1839.48	1988.54	1772.61	1866.88	3.27112	0.0592144	3	670	1725.95	1785.04	1822.45	1777.81	3.24989	0.0273683	3	706	0.952292	-0.0705244	0.270615
Q9VFX0	21	16	97.2399	2.09531e-06	5.67875	0.000118117	2.52649	1	Experimental_No_Manganese	Control_Manganese	111514	Aminopeptidase OS=Drosophila melanogaster OX=7227 GN=Dmel\CG8773 PE=1 SV=2	1880.25	1895.06	1818.21	1864.51	3.27056	0.021869	3	671	4767.24	4825.02	4539.74	4710.67	3.67308	0.0320164	3	288	2.52649	1.33714	6.01258e-06
O76877	2	1	12.2319	0.0695332	1.15781	0.038663	1.11117	0.466293	Control_Manganese	Experimental_No_Manganese	18081.9	EG:132E8.3 protein OS=Drosophila melanogaster OX=7227 GN=EG:132E8.3 PE=1 SV=1	1995.26	1807.82	1760.23	1854.44	3.26821	0.067003	3	672	1729.82	1627.89	1649.01	1668.91	3.22243	0.0322368	3	732	0.899954	-0.152077	0.0765448
Q9I7U5	5	5	22.4376	0.0836263	1.07766	0.0441743	1.02605	0.417457	Control_Manganese	Experimental_No_Manganese	79048.1	Centrobin_ isoform A OS=Drosophila melanogaster OX=7227 GN=Cnb PE=4 SV=1	1826.04	1854.1	1878.2	1852.78	3.26782	0.0140904	3	673	1778.65	1814.09	1824.51	1805.75	3.25666	0.0133148	3	697	0.974616	-0.0370943	0.0833749
Q9W4P6;X2JCG8	13	5	59.6462	0.351738	0.453781	0.129587	1.09824	0.1302	Experimental_No_Manganese	Control_Manganese	89793	FI03654p OS=Drosophila melanogaster OX=7227 GN=Dmel\CG2930 PE=1 SV=2	1802.07	1624.56	2097.05	1841.23	3.26511	0.129624	3	674	1824.26	2049.71	2192.39	2022.12	3.30581	0.09179	3	646	1.09824	0.135199	0.358612
Q9VJ86	30	15	142.212	0.167295	0.776516	0.0738481	1.0547	0.255529	Control_Manganese	Experimental_No_Manganese	158234	Bicoid stability factor OS=Drosophila melanogaster OX=7227 GN=bsf PE=1 SV=2	1942.7	1814.61	1761.64	1839.65	3.26474	0.0506033	3	675	1760.46	1767.89	1704.38	1744.25	3.24161	0.019905	3	713	0.948139	-0.0768302	0.171604
O18404;D5A7S2	20	14	96.518	0.963504	0.0161467	0.264485	1.00182	0.0501684	Experimental_No_Manganese	Control_Manganese	27019.1	3-hydroxyacyl-CoA dehydrogenase type-2 OS=Drosophila melanogaster OX=7227 GN=scu PE=1 SV=1	1926.13	1795.54	1784.62	1835.43	3.26374	0.0429	3	676	1902.93	1867.25	1746.11	1838.76	3.26453	0.0447056	3	689	1.00182	0.00261687	0.961992
Q9V6K1;A0A0B4LF88;A0A0B4LGC0;Q9V6K1-2	21	12	96.1973	0.822208	0.0850182	0.234595	1.00479	0.0540928	Control_Manganese	Experimental_No_Manganese	159707	Tripeptidyl-peptidase 2 OS=Drosophila melanogaster OX=7227 GN=TppII PE=1 SV=2	1861.69	1817.78	1823.21	1834.23	3.26345	0.0130519	3	677	1754.58	1873.45	1848.4	1825.48	3.26138	0.0343272	3	690	0.99523	-0.00689826	0.832343
Q9VVR9;X2JB94	18	15	69.9266	0.00118958	2.92461	0.00262711	1.22971	0.999932	Control_Manganese	Experimental_No_Manganese	60883.2	Probable cytochrome P450 12c1_ mitochondrial OS=Drosophila melanogaster OX=7227 GN=Cyp12c1 PE=2 SV=2	1814.69	1784.74	1872.86	1824.1	3.26105	0.0245631	3	679	1426.08	1492.71	1531.26	1483.35	3.17124	0.0358728	3	781	0.813197	-0.298324	0.00105805
Q9VTZ4	5	4	26.5253	0.947132	0.0235895	0.261609	1.0043	0.0503537	Control_Manganese	Experimental_No_Manganese	60809.2	Phosphoacetylglucosamine mutase OS=Drosophila melanogaster OX=7227 GN=nst PE=1 SV=1	1962.47	1734.25	1757.86	1818.19	3.25964	0.0690264	3	680	1850.77	1816.05	1764.41	1810.41	3.25778	0.0240028	3	693	0.995719	-0.0061892	0.924034
M9PET7;Q9VTC2	2	1	10.0429	0.020871	1.68046	0.017153	1.24118	0.787429	Experimental_No_Manganese	Control_Manganese	19022.2	Biogenesis of lysosome-related organelles complex 1_ subunit 4_ isoform B OS=Drosophila melanogaster OX=7227 GN=Blos4 PE=1 SV=1	1858.11	1936.19	1658.25	1817.52	3.25948	0.0788695	3	681	2407.83	2128.26	2231.51	2255.87	3.35331	0.0626653	3	600	1.24118	0.311713	0.0195839
O17445;A8Y560	10	6	47.2343	0.281168	0.551034	0.109687	1.3159	0.162402	Experimental_No_Manganese	Control_Manganese	24439.4	60S ribosomal protein L15 OS=Drosophila melanogaster OX=7227 GN=RpL15 PE=1 SV=1	2108.01	984.022	2339.71	1810.58	3.25782	0.400498	3	682	2349.31	2492.34	2305.99	2382.54	3.37704	0.0409317	3	579	1.3159	0.396052	0.247179
Q8IMT4	8	5	38.4923	3.9087e-05	4.40797	0.00040248	1.7964	1	Experimental_No_Manganese	Control_Manganese	50262.8	Uncharacterized protein OS=Drosophila melanogaster OX=7227 GN=CG13665 PE=1 SV=1	1870.38	1800.07	1729.15	1799.87	3.25524	0.0392343	3	683	3240.12	3337.2	3122.52	3233.28	3.50964	0.0332491	3	448	1.7964	0.845107	4.24584e-05
A0A0C4FEI8;Q9V3D8	7	2	33.7067	0.00312305	2.50542	0.00476867	1.25518	0.995414	Experimental_No_Manganese	Control_Manganese	72491.3	Granny smith_ isoform F OS=Drosophila melanogaster OX=7227 GN=grsm PE=1 SV=1	1868.15	1768.62	1758.33	1798.37	3.25488	0.0337285	3	684	2369.24	2266.05	2136.51	2257.27	3.35358	0.0516631	3	598	1.25518	0.32789	0.00377359
A0A0B4K7G4;P13469	9	6	52.2712	0.0977101	1.01006	0.0496029	1.12981	0.37785	Experimental_No_Manganese	Control_Manganese	60423.8	Modulo_ isoform C OS=Drosophila melanogaster OX=7227 GN=mod PE=1 SV=1	1953.05	1705.44	1735.96	1798.15	3.25483	0.0750835	3	685	2164.83	2030.55	1899.33	2031.57	3.30783	0.0653437	3	645	1.12981	0.17608	0.0996194
P46415	9	6	58.425	0.295306	0.529728	0.113908	1.05888	0.154935	Control_Manganese	Experimental_No_Manganese	41073.9	Alcohol dehydrogenase class-3 OS=Drosophila melanogaster OX=7227 GN=Fdh PE=1 SV=3	1754.08	1712.87	1904.81	1790.58	3.25299	0.0564306	3	686	1796.15	1687.12	1589.76	1691.01	3.22815	0.06106	3	728	0.944391	-0.0825445	0.298514
Q9VHT9	4	3	21.5021	0.00451928	2.34493	0.00607064	1.11527	0.986145	Experimental_No_Manganese	Control_Manganese	14976.3	GEO08986p1 OS=Drosophila melanogaster OX=7227 GN=Nazo PE=1 SV=2	1789.83	1760.15	1816.76	1788.92	3.25259	0.0158286	3	687	1938.97	1992.92	2053.45	1995.12	3.29997	0.0287065	3	651	1.11527	0.157387	0.0050244
C0HKF7;A0A0B4LHX9;C0HKF8;Q9VRS8;Q7JX43;Q9VA66;Q9VA67;Q9VMX8	6	4	29.9073	0.000640375	3.19357	0.00189635	1.57331	0.999999	Control_Manganese	Experimental_No_Manganese	28811	Serine protease 1 OS=Drosophila melanogaster OX=7227 GN=Jon99Cii PE=2 SV=1	1653.45	1848.16	1827.76	1776.46	3.24955	0.0602419	3	689	1112.96	1078.31	1196.09	1129.12	3.05274	0.0536075	3	912	0.635601	-0.653806	0.000802135
Q8INU6	9	5	31.8803	0.000161458	3.79194	0.000852877	1.12946	1	Control_Manganese	Experimental_No_Manganese	36043.7	FI03731p OS=Drosophila melanogaster OX=7227 GN=CG9332 PE=2 SV=1	1754.36	1797.18	1766.11	1772.55	3.2486	0.0124826	3	690	1553.39	1579.23	1575.49	1569.37	3.19573	0.00889831	3	758	0.885375	-0.175639	0.000176768
Q9VGA0	6	5	36.7802	0.481354	0.317536	0.161818	1.02243	0.0932229	Control_Manganese	Experimental_No_Manganese	25575.3	Glutathione S transferase D9_ isoform A OS=Drosophila melanogaster OX=7227 GN=GstD9 PE=1 SV=1	1736.25	1813.1	1765.34	1771.56	3.24836	0.0219045	3	691	1734.18	1811.19	1652.75	1732.71	3.23873	0.0457262	3	717	0.978066	-0.0319956	0.488054
Q9VE12	4	3	16.1902	0.267163	0.573224	0.105381	1.01911	0.170424	Control_Manganese	Experimental_No_Manganese	36868.4	LD27322p OS=Drosophila melanogaster OX=7227 GN=Dmel\CG6005 PE=2 SV=2	1733.39	1800.93	1744.58	1759.63	3.24542	0.020574	3	692	1697.7	1735.13	1747.1	1726.64	3.2372	0.0149256	3	719	0.981251	-0.0273059	0.267874
Q7JWV7	8	2	29.7574	0.0480063	1.3187	0.0301693	1.11509	0.568194	Experimental_No_Manganese	Control_Manganese	25655.7	Tetraspanin OS=Drosophila melanogaster OX=7227 GN=Tsp42Ed PE=1 SV=1	1689.7	1883.32	1683.29	1752.1	3.24356	0.064883	3	693	1980.75	1977.94	1902.56	1953.75	3.29087	0.022704	3	659	1.11509	0.157161	0.0458288
Q7K4Q9	1	1	4.7082	0.709418	0.149098	0.211204	1.03385	0.0614209	Experimental_No_Manganese	Control_Manganese	51576.2	3-hydroxy-3-methylglutaryl coenzyme A synthase OS=Drosophila melanogaster OX=7227 GN=Hmgs PE=1 SV=1	1394.74	1825.43	2025.34	1748.5	3.24267	0.184309	3	694	1771.97	1781.75	1869.35	1807.69	3.25712	0.0296634	3	695	1.03385	0.0480262	0.769365
M9PD08;Q9VK85	6	3	36.4935	0.70411	0.152359	0.210583	1.02703	0.0618733	Control_Manganese	Experimental_No_Manganese	55800.8	Eukaryotic translation release factor 3_ isoform C OS=Drosophila melanogaster OX=7227 GN=eRF3 PE=1 SV=1	1906.54	1666.27	1659.14	1743.98	3.24154	0.0807476	3	695	1861.79	1628.14	1604.32	1698.08	3.22996	0.0837846	3	726	0.97368	-0.0384809	0.711526
P49630;X2JC35	8	8	22.2296	0.671506	0.17295	0.203321	1.01863	0.0648921	Control_Manganese	Experimental_No_Manganese	13502.1	60S ribosomal protein L36 OS=Drosophila melanogaster OX=7227 GN=RpL36 PE=1 SV=1	1849.65	1689.36	1681.67	1740.23	3.24061	0.0544991	3	697	1701.16	1784.94	1639.11	1708.4	3.23259	0.0428378	3	722	0.981708	-0.0266342	0.669245
Q9V3G7	5	3	23.6928	0.257789	0.588736	0.10272	1.08367	0.17618	Experimental_No_Manganese	Control_Manganese	45552.2	26S proteasome non-ATPase regulatory subunit 6 OS=Drosophila melanogaster OX=7227 GN=Rpn7 PE=2 SV=1	1893.01	1543.46	1754.48	1730.31	3.23812	0.101727	3	698	1799.83	1890.67	1934.74	1875.08	3.27302	0.0366888	3	681	1.08367	0.115919	0.255253
Q9VBT1	12	11	54.1703	0.0493723	1.30652	0.0305609	1.11847	0.560389	Control_Manganese	Experimental_No_Manganese	48148.8	Uncharacterized protein OS=Drosophila melanogaster OX=7227 GN=CG10634 PE=1 SV=2	1668.87	1821.75	1690.45	1727.02	3.2373	0.0479108	3	699	1464.35	1546.37	1621.57	1544.1	3.18868	0.0509265	3	766	0.894081	-0.161522	0.0500423
Q8SXY2	3	3	23.2312	0.00496746	2.30387	0.00649402	1.0754	0.982249	Experimental_No_Manganese	Control_Manganese	42302.7	Fatty acid 2-hydroxylase OS=Drosophila melanogaster OX=7227 GN=fa2h PE=2 SV=1	1750.94	1714.21	1712.98	1726.04	3.23705	0.0124968	3	700	1896.33	1837.86	1834.35	1856.18	3.26862	0.018757	3	686	1.0754	0.104872	0.0053153
Q7KVL7;Q9W277	5	2	21.8944	0.0135408	1.86835	0.0129962	1.21116	0.87624	Experimental_No_Manganese	Control_Manganese	92100.6	Vacuolar protein sorting-associated protein 35 OS=Drosophila melanogaster OX=7227 GN=Vps35 PE=1 SV=2	1858.03	1706.06	1611.03	1725.04	3.2368	0.072223	3	701	2094.18	2156.98	2016.74	2089.3	3.32	0.0336219	3	634	1.21116	0.276387	0.0115903
Q9VWV6	10	8	60.1008	0.0325035	1.48807	0.0233555	1.46164	0.675526	Experimental_No_Manganese	Control_Manganese	73009.1	Transferrin OS=Drosophila melanogaster OX=7227 GN=Tsf1 PE=1 SV=1	1862.64	1346.08	1963.05	1723.92	3.23652	0.192031	3	702	2401.74	2488.37	2669.15	2519.75	3.40136	0.0541479	3	553	1.46164	0.547586	0.0183079
Q9VL78;X2J5E8	16	9	70.0682	0.772481	0.112112	0.225187	1.01097	0.0568133	Control_Manganese	Experimental_No_Manganese	49365.6	FK506-binding protein 59 OS=Drosophila melanogaster OX=7227 GN=FKBP59 PE=1 SV=1	1716.71	1702.14	1752.04	1723.63	3.23644	0.0148874	3	703	1677.99	1832.5	1604.29	1704.93	3.23171	0.0683098	3	724	0.989149	-0.0157401	0.799345
Q8SXM8;Q9W327	7	2	33.6154	0.179942	0.744868	0.0778076	1.04157	0.240916	Control_Manganese	Experimental_No_Manganese	65117.3	Lysine--tRNA ligase OS=Drosophila melanogaster OX=7227 GN=LysRS PE=1 SV=1	1648.29	1770.29	1737.74	1718.77	3.23522	0.0367557	3	704	1656.85	1610.87	1682.79	1650.17	3.21753	0.0220714	3	736	0.960086	-0.0587646	0.178545
Q9W1H8	15	10	77.3934	0.0012661	2.89753	0.00266081	1.10906	0.999904	Experimental_No_Manganese	Control_Manganese	51040.6	GH13256p OS=Drosophila melanogaster OX=7227 GN=Thiolase PE=1 SV=1	1722.56	1713.97	1691.58	1709.37	3.23284	0.00935422	3	706	1872.51	1939.91	1874.98	1895.8	3.27779	0.0201593	3	675	1.10906	0.149341	0.00146158
Q9VMB9	4	2	12.0561	0.041212	1.38498	0.0275376	1.15056	0.6106	Control_Manganese	Experimental_No_Manganese	13921	Cytochrome c oxidase subunit 5B_ isoform A OS=Drosophila melanogaster OX=7227 GN=COX5B PE=1 SV=1	1825.23	1668.04	1620.91	1704.72	3.23165	0.0627589	3	707	1501.94	1395.57	1547.43	1481.64	3.17074	0.0526027	3	782	0.869139	-0.202341	0.043282
A1ZB72	14	9	67.8881	0.144794	0.839249	0.0661977	1.09166	0.285939	Experimental_No_Manganese	Control_Manganese	25510.2	Glutathione S transferase E7 OS=Drosophila melanogaster OX=7227 GN=GstE7 PE=1 SV=1	1836.43	1702.52	1572.74	1703.9	3.23144	0.0773834	3	708	1931.93	1849.89	1798.42	1860.08	3.26953	0.0362012	3	684	1.09166	0.126529	0.141687
Q8T4E7	2	2	9.2141	0.0336531	1.47297	0.0239614	1.16395	0.666157	Experimental_No_Manganese	Control_Manganese	47629.3	AT02038p OS=Drosophila melanogaster OX=7227 GN=FBXO15 PE=2 SV=1	1580.97	1741.71	1783	1701.89	3.23093	0.0627167	3	710	1866.95	2071.69	2004.09	1980.91	3.29686	0.0526622	3	654	1.16395	0.219024	0.0317328
F0JAN1;Q9I7S8	2	2	10.4635	0.0071374	2.14646	0.00842889	1.36531	0.959081	Control_Manganese	Experimental_No_Manganese	47623.7	Ade5_ isoform B OS=Drosophila melanogaster OX=7227 GN=Paics PE=1 SV=1	1880.1	1672.03	1526.26	1692.8	3.2286	0.105053	3	711	1256.56	1232.59	1230.43	1239.86	3.09337	0.0116984	3	860	0.732434	-0.449229	0.0117197
A0A0B4K6V8;Q95U30	12	9	66.1025	0.0136551	1.86471	0.0130505	1.15878	0.874757	Experimental_No_Manganese	Control_Manganese	62001.3	Alpha-Esterase-5_ isoform B OS=Drosophila melanogaster OX=7227 GN=alpha-Est5 PE=1 SV=1	1612.46	1686.03	1765.41	1687.97	3.22736	0.045317	3	713	2044.25	1934.67	1889.02	1955.98	3.29136	0.0407861	3	657	1.15878	0.212603	0.0136951
Q9VVT6	2	2	6.5312	0.049477	1.3056	0.0305609	1.11234	0.5598	Control_Manganese	Experimental_No_Manganese	12525.5	GEO08966p1 OS=Drosophila melanogaster OX=7227 GN=Grx1 PE=2 SV=1	1593.65	1796.81	1662.86	1684.44	3.22646	0.0613184	3	714	1550.61	1515.38	1476.98	1514.32	3.18022	0.0243195	3	774	0.899005	-0.153599	0.0548227
Q9W0M7;Q9W0M7-2	12	6	57.4085	0.000726944	3.1385	0.002006	1.17931	0.999997	Control_Manganese	Experimental_No_Manganese	138099	Splicing factor 3B subunit 3 OS=Drosophila melanogaster OX=7227 GN=Sf3b3 PE=1 SV=2	1717.83	1641.91	1652.59	1670.77	3.22292	0.0245989	3	715	1446.78	1402.34	1401.1	1416.74	3.15129	0.0183677	3	803	0.847956	-0.237938	0.000827791
Q7JXZ2	14	9	60.2763	0.366957	0.435384	0.134183	1.0434	0.12465	Control_Manganese	Experimental_No_Manganese	43159.4	Eip55E_ isoform A OS=Drosophila melanogaster OX=7227 GN=Eip55E PE=1 SV=1	1783.36	1597.45	1629.51	1670.11	3.22275	0.0595066	3	716	1527.98	1623.42	1650.54	1600.65	3.2043	0.0402174	3	749	0.958407	-0.0612901	0.367039
E4NKJ3;P36188-10;P36188-6;A4V4Q6;P36188;P36188-7	4	1	28.9557	0.0141918	1.84796	0.0133033	1.13509	0.867823	Experimental_No_Manganese	Control_Manganese	29280.8	GH04081p OS=Drosophila melanogaster OX=7227 GN=wupA PE=1 SV=1	1623.48	1627.08	1747.73	1666.1	3.2217	0.0424481	3	717	1822	1917.73	1933.76	1891.16	3.27673	0.0319563	3	676	1.13509	0.182802	0.0138014
Q9VG30	10	8	56.9887	0.159562	0.797069	0.0712822	1.07079	0.265283	Control_Manganese	Experimental_No_Manganese	59242.3	Uncharacterized protein OS=Drosophila melanogaster OX=7227 GN=Ugt37A2 PE=1 SV=1	1772.21	1566.8	1635.61	1658.21	3.21964	0.0630535	3	719	1573.36	1503.17	1569.19	1548.57	3.18993	0.0254278	3	765	0.933886	-0.0986821	0.164433
P08510;A0A0S0X7Z4;P08510-2;P08510-8;P08510-6;P08510-3;P08510-9	5	2	21.641	0.262342	0.581133	0.104215	1.11769	0.173343	Experimental_No_Manganese	Control_Manganese	74592.5	Potassium voltage-gated channel protein Shaker OS=Drosophila melanogaster OX=7227 GN=Sh PE=1 SV=3	1691	1412.87	1869.68	1657.85	3.21955	0.138857	3	720	1979.51	1751.73	1827.63	1852.96	3.26787	0.0625942	3	687	1.11769	0.160516	0.26006
Q8IPP8	5	3	28.6515	0.336227	0.473367	0.124932	1.04247	0.136298	Control_Manganese	Experimental_No_Manganese	27442.4	Uncharacterized protein OS=Drosophila melanogaster OX=7227 GN=CG2907 PE=1 SV=1	1763.21	1624.83	1581.79	1656.61	3.21922	0.0572224	3	721	1647.64	1562.12	1557.61	1589.12	3.20116	0.03192	3	751	0.95926	-0.0600055	0.338051
Q7KMM4	12	6	60.0374	0.186886	0.728423	0.0805431	1.05997	0.233519	Control_Manganese	Experimental_No_Manganese	106131	BcDNA.GH04962 OS=Drosophila melanogaster OX=7227 GN=GCS2alpha PE=1 SV=1	1737.83	1586.39	1640.08	1654.76	3.21874	0.0464005	3	722	1484.5	1591.34	1607.6	1561.15	3.19344	0.0428347	3	759	0.943426	-0.0840186	0.186488
Q9VLG9	14	10	66.0212	0.499784	0.301218	0.165842	1.02236	0.0894427	Experimental_No_Manganese	Control_Manganese	52490.8	Uncharacterized protein_ isoform B OS=Drosophila melanogaster OX=7227 GN=Argl PE=1 SV=3	1737.01	1604.58	1612.01	1651.2	3.2178	0.0450626	3	724	1633.86	1715.2	1715.3	1688.12	3.2274	0.0278367	3	729	1.02236	0.0318995	0.507726
Q9VNA3	3	2	16.8711	0.55864	0.252868	0.179071	1.04168	0.0790868	Control_Manganese	Experimental_No_Manganese	23861.5	GH21273p OS=Drosophila melanogaster OX=7227 GN=Dmel\CG11999 PE=1 SV=1	1499.77	1643.34	1797.02	1646.71	3.21662	0.0902724	3	725	1685.12	1526.93	1530.45	1580.83	3.19889	0.0571426	3	753	0.959992	-0.0589061	0.547636
Q9VW59	9	7	31.5662	0.157603	0.802435	0.0705682	1.07059	0.267863	Experimental_No_Manganese	Control_Manganese	23218.3	LD16419p OS=Drosophila melanogaster OX=7227 GN=RhoGDI PE=1 SV=1	1644.25	1564.13	1730.84	1646.41	3.21654	0.0506421	3	726	1785.03	1828.87	1674	1762.63	3.24616	0.0452891	3	709	1.07059	0.0984112	0.15611
Q00637;A0A0B4LGQ1	8	5	20.3991	0.0295029	1.53013	0.0218419	1.09372	0.701284	Control_Manganese	Experimental_No_Manganese	24912.3	Superoxide dismutase [Mn]_ mitochondrial OS=Drosophila melanogaster OX=7227 GN=Sod2 PE=2 SV=3	1589.23	1720.11	1629.55	1646.3	3.21651	0.0407142	3	727	1486.48	1483.48	1545.71	1505.22	3.1776	0.023313	3	775	0.914309	-0.129246	0.0319871
P28668;P28668-2	20	7	95.3802	0.528993	0.27655	0.172317	1.01544	0.0839994	Control_Manganese	Experimental_No_Manganese	190610	Bifunctional glutamate/proline--tRNA ligase OS=Drosophila melanogaster OX=7227 GN=GluProRS PE=1 SV=2	1678.8	1679.29	1579.16	1645.75	3.21636	0.0350436	3	728	1642.63	1601.44	1618.09	1620.72	3.20971	0.0127867	3	743	0.984792	-0.0221092	0.518362
Q9VDZ7	4	1	16.9053	0.0553408	1.25695	0.033077	1.17517	0.528716	Control_Manganese	Experimental_No_Manganese	53274.7	Mitochondrial import inner membrane translocase subunit TIM44 OS=Drosophila melanogaster OX=7227 GN=Dmel\CG11779 PE=1 SV=1	1631.69	1594.48	1701.57	1642.58	3.21553	0.0330998	3	729	1557.1	1358.08	1278.05	1397.74	3.14543	0.102805	3	809	0.850942	-0.232867	0.0508374
Q9VV72	8	4	34.1652	0.3985	0.399571	0.141225	1.03673	0.114342	Experimental_No_Manganese	Control_Manganese	54255.4	Multiple inositol polyphosphate phosphatase 1 OS=Drosophila melanogaster OX=7227 GN=Mipp1 PE=1 SV=2	1633.31	1610.14	1681.57	1641.67	3.21529	0.0221969	3	730	1588.67	1783.76	1733.51	1701.98	3.23095	0.0595166	3	725	1.03673	0.0520463	0.386847
Q9VL18;Q9VL18-2	7	3	41.4645	0.354221	0.450726	0.130256	1.04055	0.129266	Experimental_No_Manganese	Control_Manganese	28991.7	Probable elongation factor 1-delta OS=Drosophila melanogaster OX=7227 GN=eEF1delta PE=1 SV=1	1699.66	1657.66	1566.98	1641.43	3.21522	0.0413124	3	731	1808.34	1651.62	1664.03	1707.99	3.23249	0.0510099	3	723	1.04055	0.0573482	0.355322
Q59DY3	4	1	17.6638	0.869333	0.0608136	0.244825	1.00942	0.0521851	Control_Manganese	Experimental_No_Manganese	49625.6	Uncharacterized protein OS=Drosophila melanogaster OX=7227 GN=CG14398 PE=4 SV=2	1733.67	1611.18	1546.74	1630.53	3.21233	0.058236	3	733	1940.53	1521.59	1383.82	1615.31	3.20826	0.179502	3	744	0.990667	-0.0135286	0.935305
M9MRD0;M9PE40;P35122	3	1	13.7436	0.010513	1.97827	0.011047	1.36884	0.916063	Control_Manganese	Experimental_No_Manganese	26021.3	Ubiquitin carboxyl-terminal hydrolase OS=Drosophila melanogaster OX=7227 GN=Uch PE=3 SV=1	1816.22	1525.95	1547.96	1630.04	3.2122	0.0991436	3	734	1288.66	1140.32	1143.46	1190.82	3.07584	0.0711723	3	882	0.730544	-0.452957	0.0140435
Q8SWZ6	2	2	13.6462	4.67555e-06	5.33017	0.000168408	6.16939	1	Experimental_No_Manganese	Control_Manganese	26549	RH51312p OS=Drosophila melanogaster OX=7227 GN=BcDNA:RH51312 PE=2 SV=1	1736.56	1469.34	1683.88	1629.93	3.21217	0.0868398	3	735	10179.1	10275.1	9712.72	10055.6	4.00241	0.0299169	3	93	6.16939	2.62513	1.61057e-06
Q9W185	2	1	4.152	1.74125e-05	4.75914	0.000262665	4.38797	1	Experimental_No_Manganese	Control_Manganese	74397.6	Uncharacterized protein_ isoform B OS=Drosophila melanogaster OX=7227 GN=Fatp3 PE=1 SV=1	1788.94	1487.4	1603.19	1626.51	3.21126	0.0935245	3	736	7567.16	6938.21	6905.87	7137.08	3.85352	0.0522357	3	163	4.38797	2.13355	1.87803e-05
Q9U9Q4	3	2	16.8861	0.0988645	1.00496	0.0499941	1.05772	0.374928	Control_Manganese	Experimental_No_Manganese	38749.9	Eukaryotic translation initiation factor 3 subunit H OS=Drosophila melanogaster OX=7227 GN=eIF3h PE=1 SV=2	1562.65	1689.79	1619.97	1624.14	3.21062	0.0392048	3	738	1511.81	1575.18	1519.52	1535.51	3.18625	0.0225172	3	770	0.945429	-0.0809593	0.101488
D5A7M1;Q9W1C9	4	2	23.899	0.00286665	2.54262	0.00451572	1.19471	0.99657	Experimental_No_Manganese	Control_Manganese	14768	Ejaculatory bulb protein III_ isoform B OS=Drosophila melanogaster OX=7227 GN=EbpIII PE=1 SV=1	1565.97	1708.47	1597.7	1624.05	3.2106	0.0460641	3	739	1959.69	1911.41	1949.68	1940.26	3.28786	0.013134	3	664	1.19471	0.256655	0.00227612
Q9VVU2;Q7JRQ1	4	3	18.6006	0.0315646	1.5008	0.0228067	1.18811	0.683378	Experimental_No_Manganese	Control_Manganese	17281.2	GEO07453p1 OS=Drosophila melanogaster OX=7227 GN=RpL26 PE=1 SV=1	1488.08	1627.63	1752.61	1622.77	3.21026	0.0815474	3	740	2024.45	1862.81	1896.87	1928.04	3.28512	0.0441955	3	669	1.18811	0.248674	0.0283226
Q24583	3	2	17.1163	0.0884865	1.05312	0.0459838	1.17059	0.402897	Experimental_No_Manganese	Control_Manganese	14021.1	V-type proton ATPase subunit F 1 OS=Drosophila melanogaster OX=7227 GN=Vha14-1 PE=1 SV=1	1585.64	1438.46	1822.53	1615.55	3.20832	0.119945	3	741	1808.3	1937.63	1927.5	1891.15	3.27673	0.0380311	3	677	1.17059	0.227241	0.0820777
Q9W4W4	10	5	48.6232	0.477968	0.320601	0.161064	1.02227	0.0939489	Control_Manganese	Experimental_No_Manganese	70368.3	E3 ubiquitin-protein ligase OS=Drosophila melanogaster OX=7227 GN=EG:100G10.2 PE=2 SV=2	1603.02	1553.55	1679.61	1612.06	3.20738	0.0393983	3	742	1562.78	1541.3	1626.74	1576.94	3.19782	0.0281869	3	755	0.978214	-0.0317777	0.476506
P11997	19	10	93.0811	0.601863	0.220502	0.188581	1.0873	0.072883	Experimental_No_Manganese	Control_Manganese	93465.4	Larval serum protein 1 gamma chain OS=Drosophila melanogaster OX=7227 GN=Lsp1gamma PE=2 SV=2	1171.69	1587.18	2057.91	1605.59	3.20564	0.276158	3	743	1473.11	1843.01	1921.19	1745.77	3.24199	0.1371	3	712	1.0873	0.120756	0.65509
B7Z073;G4LTX2	1	1	6.103	0.846623	0.0723099	0.240159	1.03043	0.0530262	Control_Manganese	Experimental_No_Manganese	13572.4	SOSS complex subunit C homolog OS=Drosophila melanogaster OX=7227 GN=CG42374 PE=3 SV=1	1317.15	1844.7	1643.97	1601.94	3.20465	0.166219	3	744	1456.15	1537.68	1670.08	1554.64	3.19163	0.0694468	3	763	0.97047	-0.043244	0.789678
P91927	15	8	68.5084	0.000850112	3.07052	0.00214389	1.36777	0.999991	Experimental_No_Manganese	Control_Manganese	113922	Mitochondrial proton/calcium exchanger protein OS=Drosophila melanogaster OX=7227 GN=Letm1 PE=2 SV=2	1550.56	1604.46	1621.72	1592.25	3.20201	0.0233125	3	745	2296.3	2055.36	2181.81	2177.82	3.33802	0.0553385	3	618	1.36777	0.451823	0.00129722
Q9GNH8;Q9W330	7	6	35.6827	0.113947	0.943299	0.0557478	1.08464	0.34043	Control_Manganese	Experimental_No_Manganese	50713.8	Phosphotransferase OS=Drosophila melanogaster OX=7227 GN=Hex-A PE=1 SV=1	1687.04	1504.84	1559.85	1583.91	3.19973	0.0590013	3	747	1523.09	1423.54	1434.3	1460.31	3.16445	0.037415	3	789	0.921965	-0.117217	0.119126
Q9VH69;A0A0C4DHE8	5	4	24.4403	0.209683	0.678437	0.0872882	1.09351	0.211867	Control_Manganese	Experimental_No_Manganese	6875.77	40S ribosomal protein S29 OS=Drosophila melanogaster OX=7227 GN=RpS29 PE=1 SV=1	1596.61	1714.29	1421.61	1577.51	3.19797	0.09336	3	749	1460.07	1386.3	1481.44	1442.6	3.15915	0.0346	3	794	0.914485	-0.128969	0.207372
Q9W592	7	5	32.5949	0.140493	0.852344	0.0646855	1.07434	0.292525	Control_Manganese	Experimental_No_Manganese	120878	EG:BACN32G11.3 protein OS=Drosophila melanogaster OX=7227 GN=Lrpprc2 PE=1 SV=1	1459.04	1633.33	1639.51	1577.29	3.19791	0.0649582	3	750	1463.71	1472.72	1468.03	1468.15	3.16677	0.00306634	3	788	0.930807	-0.103446	0.139083
Q9VP61;Q59E09;Q9VP61-2	10	6	47.5107	0.00122273	2.91267	0.00263495	1.20359	0.999921	Control_Manganese	Experimental_No_Manganese	76758.1	Acetyl-coenzyme A synthetase OS=Drosophila melanogaster OX=7227 GN=AcCoAS PE=2 SV=1	1526.7	1561.04	1640.42	1576.05	3.19757	0.0370097	3	751	1289	1319.8	1319.57	1309.46	3.11709	0.0135293	3	836	0.830847	-0.267345	0.00162872
A0ZWY4	1	1	6.7404	0.0687271	1.16287	0.0384015	1.18373	0.469436	Experimental_No_Manganese	Control_Manganese	11493.7	CG12780 protein OS=Drosophila melanogaster OX=7227 GN=Dmel\CG12780 PE=4 SV=1	1457.38	1483.09	1781.04	1573.84	3.19696	0.114307	3	752	1769.29	1879.44	1940.25	1862.99	3.27021	0.0465165	3	683	1.18373	0.243338	0.0661891
Q9VAQ0	9	4	36.5502	0.0152	1.81816	0.0139474	1.14986	0.854958	Experimental_No_Manganese	Control_Manganese	97329	Cullin 5 OS=Drosophila melanogaster OX=7227 GN=Cul5 PE=1 SV=1	1566.48	1559.25	1592	1572.58	3.19661	0.0109425	3	753	1698.03	1821.99	1904.71	1808.24	3.25726	0.0575291	3	694	1.14986	0.201457	0.0179745
Q2MGL8	8	4	46.311	0.59129	0.228199	0.186999	1.02098	0.0743039	Control_Manganese	Experimental_No_Manganese	35915.2	Uncharacterized protein OS=Drosophila melanogaster OX=7227 GN=CG1211 PE=1 SV=1	1610.82	1606.8	1500.01	1572.54	3.1966	0.039966	3	754	1569.64	1592.94	1458.12	1540.23	3.18759	0.0467859	3	767	0.979453	-0.029952	0.589775
Q0E8X7	3	3	20.8758	0.143316	0.843705	0.0657527	1.06162	0.288171	Control_Manganese	Experimental_No_Manganese	9598.09	Reduction of Rh1_ isoform A OS=Drosophila melanogaster OX=7227 GN=roh PE=1 SV=1	1612.52	1551.39	1536.31	1566.74	3.195	0.0257556	3	755	1422.01	1441.11	1564.29	1475.8	3.16903	0.0523263	3	784	0.941957	-0.0862668	0.144928
Q9XZ34	4	1	17.1023	0.113947	0.943297	0.0557478	1.23299	0.340429	Experimental_No_Manganese	Control_Manganese	158188	Telomere-associated protein RIF1 OS=Drosophila melanogaster OX=7227 GN=Rif1 PE=1 SV=1	1407.67	1762.55	1526.65	1565.62	3.19469	0.115367	3	756	2175.91	1657.42	1957.86	1930.4	3.28565	0.134862	3	668	1.23299	0.30216	0.116919
P08985;A0A0B4KH25;P84051;Q4AB57	3	2	13.1844	0.00280301	2.55238	0.00447894	1.21875	0.996829	Control_Manganese	Experimental_No_Manganese	14981.3	Histone H2A.v OS=Drosophila melanogaster OX=7227 GN=His2Av PE=1 SV=2	1584.7	1502.82	1601.89	1563.14	3.194	0.0338698	3	757	1330.24	1288.03	1229.44	1282.57	3.10808	0.0394665	3	843	0.82051	-0.285407	0.00267831
Q7JRC9	5	2	22.7382	0.441382	0.355186	0.152012	1.08828	0.102481	Control_Manganese	Experimental_No_Manganese	73104.8	RE73310p OS=Drosophila melanogaster OX=7227 GN=CG30493;CG30496;l(2)08492 PE=1 SV=1	1528.69	1554.19	1597.14	1560.01	3.19313	0.0221746	3	758	1132.42	1551.44	1616.52	1433.46	3.15639	0.183283	3	796	0.918881	-0.122051	0.454654
Q7K1W4	11	7	59.4848	0.00252097	2.59843	0.00422931	1.30339	0.99784	Control_Manganese	Experimental_No_Manganese	53944.8	Epoxide hydrolase OS=Drosophila melanogaster OX=7227 GN=Jheh3 PE=2 SV=1	1460.5	1568.86	1644.15	1557.84	3.19252	0.0592605	3	759	1151.15	1214.34	1220.18	1195.22	3.07745	0.0320264	3	880	0.767232	-0.382265	0.00327422
A5XCL5;E1JI91;Q9VSW1;Q9VSW2	17	8	86.3612	0.0232159	1.63421	0.0184826	1.10936	0.762102	Control_Manganese	Experimental_No_Manganese	58052.7	LD36265p (Fragment) OS=Drosophila melanogaster OX=7227 GN=UGP PE=1 SV=1	1500.88	1589.51	1578.67	1556.35	3.19211	0.0310633	3	760	1457.04	1346.74	1404.99	1402.92	3.14703	0.0393293	3	807	0.901418	-0.149732	0.0223075
Q9VXM4	5	3	31.4758	0.0557429	1.25381	0.0332157	1.1065	0.526714	Experimental_No_Manganese	Control_Manganese	28034.9	LD12946p OS=Drosophila melanogaster OX=7227 GN=MSBP PE=1 SV=1	1494.26	1485.23	1671.21	1550.23	3.1904	0.0676475	3	761	1708.79	1713.41	1723.81	1715.34	3.23435	0.00448604	3	720	1.1065	0.146008	0.0530081
Q9VWD9	6	3	29.9555	0.136029	0.866367	0.0633444	1.06781	0.299666	Control_Manganese	Experimental_No_Manganese	58836.8	LD38919p OS=Drosophila melanogaster OX=7227 GN=Ubqn PE=1 SV=1	1599.93	1459.41	1568.33	1542.56	3.18824	0.0477902	3	762	1466.2	1482.88	1384.7	1444.6	3.15975	0.0363674	3	793	0.936493	-0.0946605	0.134146
Q7KN90	3	1	14.2214	0.380244	0.419938	0.136712	1.07472	0.120124	Experimental_No_Manganese	Control_Manganese	84600.4	Cysteine--tRNA ligase_ cytoplasmic OS=Drosophila melanogaster OX=7227 GN=CysRS PE=1 SV=1	1622.71	1632.31	1354.02	1536.35	3.18649	0.102823	3	763	1736.38	1704.19	1512.85	1651.14	3.21778	0.0731839	3	735	1.07472	0.103958	0.374033
Q9VDX6	9	5	56.0769	0.00683648	2.16517	0.00822257	1.1192	0.962617	Control_Manganese	Experimental_No_Manganese	54494	Uncharacterized protein OS=Drosophila melanogaster OX=7227 GN=Dmel\CG18493 PE=4 SV=2	1563.43	1524.93	1511.08	1533.15	3.18558	0.0176936	3	764	1320.81	1412.29	1376.49	1369.86	3.13668	0.0336539	3	813	0.893498	-0.162464	0.0061399
O97428;Q8IRS7	5	4	29.4183	0.186573	0.729151	0.0804969	1.02904	0.233843	Control_Manganese	Experimental_No_Manganese	14410.2	Ciboulot_ isoform A OS=Drosophila melanogaster OX=7227 GN=cib PE=1 SV=1	1488.32	1533.12	1545.59	1522.34	3.18251	0.0197855	3	765	1517.97	1472.65	1447.53	1479.38	3.17008	0.0241316	3	783	0.971781	-0.0412972	0.186377
Q9W1G7	4	4	29.8351	0.934652	0.02935	0.258862	1.00174	0.050541	Experimental_No_Manganese	Control_Manganese	43052.9	LD21576p OS=Drosophila melanogaster OX=7227 GN=Nap1 PE=1 SV=1	1294.39	1565.29	1704.35	1521.35	3.18223	0.13704	3	766	1554.51	1575.24	1442.25	1524	3.18298	0.0469485	3	771	1.00174	0.00251482	0.984359
P36179;M9MQH9;H5V8B8;M9NDI6	12	11	42.3905	0.235925	0.627227	0.0953685	1.07747	0.190993	Experimental_No_Manganese	Control_Manganese	66108.3	Serine/threonine-protein phosphatase PP2A 65 kDa regulatory subunit OS=Drosophila melanogaster OX=7227 GN=Pp2A-29B PE=2 SV=4	1592.65	1450.96	1497.12	1513.58	3.18	0.0477453	3	767	1777.03	1532.33	1583.16	1630.84	3.21241	0.0791796	3	742	1.07747	0.107653	0.241819
Q9VPR4	4	1	18.3316	0.103378	0.985572	0.0515474	1.11537	0.363916	Control_Manganese	Experimental_No_Manganese	54551.2	Protein Notchless OS=Drosophila melanogaster OX=7227 GN=Nle PE=1 SV=2	1556.85	1611.19	1371.63	1513.22	3.1799	0.0829994	3	768	1332.96	1342.77	1394.39	1356.71	3.13249	0.0243246	3	816	0.896567	-0.157517	0.105114
Q9VZ47;Q8IRK8;Q8IRK9;Q9W2S9;Q9W2V3	7	3	32.9652	0.012267	1.91126	0.0120178	1.11636	0.892906	Experimental_No_Manganese	Control_Manganese	23114.9	Rab at 9Fa OS=Drosophila melanogaster OX=7227 GN=Rab9Fa PE=4 SV=2	1477.87	1534.21	1520.75	1510.94	3.17925	0.0194726	3	769	1690.44	1750.79	1619.05	1686.76	3.22705	0.0390951	3	731	1.11636	0.158807	0.0135073
P12881;I0DHK3	6	4	31.5895	0.8496	0.0707853	0.24048	1.00388	0.0529077	Experimental_No_Manganese	Control_Manganese	31229.9	Proteasome subunit alpha type-1 OS=Drosophila melanogaster OX=7227 GN=Prosalpha6 PE=1 SV=1	1523.79	1550.92	1455.16	1509.96	3.17897	0.0326857	3	770	1498.36	1509.86	1539.24	1515.82	3.18065	0.0139086	3	773	1.00388	0.00558969	0.859168
P21914	19	12	89.5398	0.33009	0.481368	0.123592	1.05841	0.138845	Experimental_No_Manganese	Control_Manganese	34482.4	Succinate dehydrogenase [ubiquinone] iron-sulfur subunit_ mitochondrial OS=Drosophila melanogaster OX=7227 GN=SdhB PE=2 SV=2	1569.67	1364.19	1589.73	1507.86	3.17836	0.0827853	3	771	1642.58	1610.56	1534.68	1595.94	3.20302	0.0347233	3	750	1.05841	0.0819016	0.326561
Q9VG93	3	3	13.251	0.0392112	1.40659	0.026564	1.05631	0.62436	Control_Manganese	Experimental_No_Manganese	25419.3	Glutathione S-transferase D7 OS=Drosophila melanogaster OX=7227 GN=GstD7 PE=1 SV=1	1477.38	1522.58	1492.24	1497.4	3.17534	0.0153835	3	772	1387.21	1461.95	1403.55	1417.57	3.15154	0.0277195	3	802	0.946689	-0.0790372	0.0385697
Q6AWN0	7	5	35.355	0.0724422	1.14001	0.0398272	1.10504	0.455297	Control_Manganese	Experimental_No_Manganese	22426	1_2-dihydroxy-3-keto-5-methylthiopentene dioxygenase OS=Drosophila melanogaster OX=7227 GN=Adi1 PE=2 SV=2	1529	1552.81	1399.66	1493.82	3.1743	0.0551677	3	773	1365.93	1402.16	1287.41	1351.83	3.13092	0.0433918	3	822	0.904948	-0.144093	0.071883
O61231;M9PIM0	6	2	26.0931	0.00153233	2.81465	0.00305602	1.43328	0.999744	Experimental_No_Manganese	Control_Manganese	26040.9	60S ribosomal protein L10 OS=Drosophila melanogaster OX=7227 GN=RpL10 PE=1 SV=1	1439.42	1415.51	1621.6	1492.18	3.17382	0.0755402	3	774	2095.12	2098.87	2222.17	2138.72	3.33015	0.0338033	3	627	1.43328	0.519325	0.00111814
Q8SXQ1	4	3	19.4092	0.00120793	2.91796	0.00263495	1.15503	0.999926	Control_Manganese	Experimental_No_Manganese	58770.4	GH05218p OS=Drosophila melanogaster OX=7227 GN=Dmel\CG9629 PE=1 SV=1	1515.11	1491.14	1451.41	1485.89	3.17199	0.0216551	3	776	1284.46	1259.99	1314.9	1286.45	3.10939	0.0213822	3	841	0.865781	-0.207926	0.00122777
A1Z6X6	8	5	30.5086	0.0102784	1.98807	0.0108588	1.18954	0.919155	Control_Manganese	Experimental_No_Manganese	20159.8	Glyoxalase 1 OS=Drosophila melanogaster OX=7227 GN=Glo1 PE=1 SV=1	1499.3	1494.42	1459.33	1484.35	3.17154	0.0146918	3	777	1327.86	1166.86	1248.79	1247.84	3.09616	0.064515	3	853	0.840663	-0.250401	0.00797761
A0A0B4KHS9;P48461	7	1	40.9358	0.00681849	2.16631	0.00822257	1.3881	0.962826	Experimental_No_Manganese	Control_Manganese	38111.4	Serine/threonine-protein phosphatase OS=Drosophila melanogaster OX=7227 GN=Pp1alpha-96A PE=3 SV=1	1487.49	1314.35	1643.41	1481.75	3.17078	0.11109	3	778	2046.31	2059.13	2065.02	2056.82	3.3132	0.0046499	3	641	1.3881	0.473112	0.00378713
Q9VZS3	2	2	12.5155	0.00885749	2.05269	0.0097983	1.13502	0.937688	Control_Manganese	Experimental_No_Manganese	12621.2	Eukaryotic translation initiation factor eIF1 OS=Drosophila melanogaster OX=7227 GN=eIF1 PE=1 SV=1	1450.82	1438.32	1546.8	1478.65	3.16987	0.0401396	3	779	1278.84	1292.9	1336.52	1302.76	3.11486	0.023087	3	838	0.881045	-0.182712	0.0101937
Q9VMQ8	4	2	18.4526	0.0407004	1.3904	0.0272423	1.11409	0.614059	Experimental_No_Manganese	Control_Manganese	78059.6	FI21485p1 OS=Drosophila melanogaster OX=7227 GN=Vps52 PE=2 SV=1	1393.9	1506.07	1528.93	1476.3	3.16917	0.0489548	3	780	1579.65	1706.79	1647.75	1644.73	3.21609	0.0386838	3	738	1.11409	0.155866	0.0387884
Q8IQW5;Q9VWG1	9	3	41.5714	0.596492	0.224396	0.187884	1.03997	0.0735974	Control_Manganese	Experimental_No_Manganese	21777.6	RE23625p OS=Drosophila melanogaster OX=7227 GN=Dmel21.3 PE=1 SV=1	1351.2	1539.07	1536.21	1475.49	3.16894	0.0729566	3	781	1267.68	1469.89	1518.79	1418.79	3.15192	0.0938298	3	801	0.96157	-0.056536	0.596907
Q9VZI1	11	1	93.2725	0.0436454	1.36006	0.0283872	1.04732	0.594682	Control_Manganese	Experimental_No_Manganese	20872.5	Transgelin OS=Drosophila melanogaster OX=7227 GN=Chd64 PE=1 SV=2	1519.15	1460.34	1442.87	1474.12	3.16853	0.0271103	3	782	1415.31	1404.03	1403.21	1407.51	3.14845	0.00480398	3	804	0.954816	-0.0667058	0.0465685
P13677	5	2	27.1863	0.0104789	1.97968	0.0110408	1.13785	0.916513	Control_Manganese	Experimental_No_Manganese	80927.5	Protein kinase C_ eye isozyme OS=Drosophila melanogaster OX=7227 GN=inaC PE=1 SV=1	1533.31	1474.71	1412.39	1473.47	3.16834	0.0410403	3	783	1335.15	1270.35	1279.38	1294.96	3.11226	0.0271028	3	839	0.878852	-0.186309	0.0114923
A0A0B4LGJ9;A0A0B4LHH1;Q960R0;Q9W1B5	6	4	26.9388	0.0584854	1.23295	0.0342531	1.13271	0.513459	Experimental_No_Manganese	Control_Manganese	61254.7	Uncharacterized protein_ isoform D OS=Drosophila melanogaster OX=7227 GN=Gpat4 PE=1 SV=1	1385.19	1578.33	1425.29	1462.94	3.16523	0.0696696	3	784	1586.98	1739.71	1644.56	1657.09	3.21935	0.046546	3	734	1.13271	0.179783	0.0581289
M9MRT6;P08645	3	2	17.6466	0.00598326	2.22306	0.00749621	1.12944	0.972151	Experimental_No_Manganese	Control_Manganese	21148.3	Rap1 GTPase_ isoform B OS=Drosophila melanogaster OX=7227 GN=Rap1 PE=4 SV=1	1520.09	1433.24	1422.31	1458.55	3.16392	0.0367355	3	785	1675.95	1641.72	1624.34	1647.33	3.21678	0.0159398	3	737	1.12944	0.175603	0.00539821
M9PCA6;Q9VMJ5	13	6	70.2592	0.200999	0.696806	0.0847563	1.06329	0.219678	Experimental_No_Manganese	Control_Manganese	75447.4	Beta galactosidase_ isoform B OS=Drosophila melanogaster OX=7227 GN=Gal PE=1 SV=1	1477.43	1403.34	1493.26	1458.01	3.16376	0.0329229	3	786	1602.91	1603.17	1444.78	1550.29	3.19041	0.0589361	3	764	1.06329	0.0885329	0.196411
Q9V6U9;H8F4T6	9	8	46.3932	0.127483	0.894549	0.0606968	1.10882	0.314292	Experimental_No_Manganese	Control_Manganese	39453.6	Enoyl-[acyl-carrier-protein] reductase_ mitochondrial OS=Drosophila melanogaster OX=7227 GN=CG16935 PE=3 SV=2	1514.57	1446.19	1398.05	1452.94	3.16225	0.0402987	3	787	1765.79	1553.06	1514.27	1611.04	3.20711	0.0840533	3	747	1.10882	0.149024	0.136997
Q9VA77	2	2	8.5163	0.0194255	1.71163	0.0161955	1.39233	0.803804	Control_Manganese	Experimental_No_Manganese	76405	Sphingomyelin phosphodiesterase OS=Drosophila melanogaster OX=7227 GN=alphaSmase PE=3 SV=2	1382.69	1453.55	1512.52	1449.59	3.16124	0.0448421	3	788	875.846	1163.85	1083.67	1041.12	3.0175	0.142772	3	951	0.71822	-0.477502	0.0120542
A0A0B4KG65;C1C553;Q70VI1;Q95U15;Q9VFC7;E1JIK9;E1JIK6;Q8I062;Q8INF1;Q9VFC6;C1C529	9	5	48.7303	0.00154267	2.81173	0.00306101	1.30934	0.999736	Experimental_No_Manganese	Control_Manganese	36019.5	Myofilin_ isoform O OS=Drosophila melanogaster OX=7227 GN=Mf PE=1 SV=1	1542.97	1369.21	1432.98	1448.38	3.16088	0.0606876	3	789	1900.83	1911.51	1876.93	1896.42	3.27794	0.00933507	3	674	1.30934	0.388836	0.000980449
Q8IR76;Q9VYI5	3	2	10.9528	0.382279	0.41762	0.136841	1.0513	0.119455	Experimental_No_Manganese	Control_Manganese	34326.6	Uncharacterized protein_ isoform B OS=Drosophila melanogaster OX=7227 GN=Fad1 PE=4 SV=1	1401.76	1383.16	1557.88	1447.6	3.16065	0.0662877	3	791	1417.88	1570.85	1576.87	1521.86	3.18238	0.0592071	3	772	1.0513	0.072177	0.383803
Q9VF37	15	4	68.0966	0.0518479	1.28527	0.0315403	1.06501	0.54679	Control_Manganese	Experimental_No_Manganese	86112.5	Crossover suppressor on 3 of Gowen OS=Drosophila melanogaster OX=7227 GN=c(3)G PE=2 SV=1	1414.85	1433.4	1484.84	1444.36	3.15968	0.0251053	3	792	1308.63	1387.02	1372.96	1356.2	3.13232	0.0308193	3	818	0.938962	-0.090861	0.0508719
Q9W130	5	2	21.8239	0.00200208	2.69852	0.00357788	1.35506	0.999136	Control_Manganese	Experimental_No_Manganese	60937.4	Cytochrome P450 9c1 OS=Drosophila melanogaster OX=7227 GN=Cyp9c1 PE=2 SV=1	1477.72	1506.72	1339.32	1441.25	3.15874	0.0620702	3	793	1109.19	1036.2	1045.45	1063.61	3.02678	0.0373614	3	942	0.737977	-0.438352	0.00260789
Q9VWL7	5	3	21.3038	0.00382589	2.41727	0.00545809	1.16809	0.991341	Control_Manganese	Experimental_No_Manganese	148890	Rho GTPase activating protein at 18B_ isoform C OS=Drosophila melanogaster OX=7227 GN=RhoGAP18B PE=4 SV=2	1486.07	1423.31	1395.64	1435.01	3.15685	0.0322912	3	795	1184.9	1249.36	1251.28	1228.51	3.08938	0.030754	3	868	0.856101	-0.224146	0.0039253
Q27415;A0A0B4KI24;Q27415-2	6	6	19.6175	0.0871438	1.05976	0.0454453	1.03995	0.406818	Control_Manganese	Experimental_No_Manganese	16995.8	Nucleoplasmin-like protein OS=Drosophila melanogaster OX=7227 GN=Nlp PE=1 SV=1	1429.91	1409.47	1464.88	1434.75	3.15678	0.0195281	3	796	1356.36	1366.58	1415.97	1379.64	3.13976	0.0231066	3	811	0.961586	-0.0565121	0.0877178
Q9W223	4	1	16.5657	0.112531	0.948728	0.0553303	1.09459	0.343405	Control_Manganese	Experimental_No_Manganese	58907.1	Probable cytochrome P450 6d2 OS=Drosophila melanogaster OX=7227 GN=Cyp6d2 PE=2 SV=1	1340.23	1465	1490.99	1432.07	3.15596	0.0562773	3	797	1257.94	1280.73	1386.28	1308.31	3.11671	0.0523356	3	837	0.913582	-0.130394	0.112606
Q8IPS4;Q9VNQ1	1	1	10.0618	0.644628	0.190691	0.197632	1.03337	0.0677114	Control_Manganese	Experimental_No_Manganese	48800	FI01826p OS=Drosophila melanogaster OX=7227 GN=Dmel\CG11109 PE=2 SV=1	1428.48	1482.44	1383.11	1431.34	3.15574	0.034742	3	798	1506.21	1456.31	1192.84	1385.12	3.14149	0.121562	3	810	0.967708	-0.047357	0.672053
Q7K0L5	9	5	39.7905	0.00742534	2.12928	0.00871627	1.10802	0.955627	Experimental_No_Manganese	Control_Manganese	66055.8	LP01562p OS=Drosophila melanogaster OX=7227 GN=veil PE=1 SV=1	1464.86	1377.95	1435.13	1425.98	3.15411	0.030975	3	800	1566.71	1562.06	1611.27	1580.02	3.19866	0.0171956	3	754	1.10802	0.147986	0.00676817
Q9VA73;A0A0B4K6V1;Q9VA73-2;Q9VA73-3;A0A0B4KHW3	18	14	80.6615	0.621209	0.206762	0.192689	1.01414	0.0704332	Experimental_No_Manganese	Control_Manganese	77039.4	Calcium-binding mitochondrial carrier protein Aralar1 OS=Drosophila melanogaster OX=7227 GN=aralar1 PE=2 SV=1	1490.04	1372.56	1401.68	1421.43	3.15272	0.0430388	3	801	1450.84	1409.58	1464.18	1441.53	3.15882	0.0197457	3	795	1.01414	0.0202619	0.633024
Q6NP72	3	2	13.0841	0.20797	0.681999	0.0870387	1.03802	0.213368	Experimental_No_Manganese	Control_Manganese	16499.3	GEO09659p1 OS=Drosophila melanogaster OX=7227 GN=Dmel\CG13220 PE=1 SV=1	1397.63	1434.66	1430.19	1420.83	3.15254	0.0142269	3	802	1476.65	1532.94	1414.95	1474.85	3.16875	0.0400143	3	786	1.03802	0.0538332	0.208031
Q9VPX6;Q9VPX7	8	4	45.5133	0.0492371	1.30771	0.0305609	1.13659	0.561152	Experimental_No_Manganese	Control_Manganese	85227.8	Adenylyl cyclase-associated protein OS=Drosophila melanogaster OX=7227 GN=capt PE=1 SV=2	1369.66	1355.74	1509.2	1411.53	3.14969	0.0601262	3	803	1684.8	1612.7	1515.51	1604.34	3.2053	0.0529534	3	748	1.13659	0.184713	0.0497727
Q9VX03	3	1	11.2535	0.322474	0.491505	0.121648	1.04756	0.142119	Control_Manganese	Experimental_No_Manganese	15042.3	Glutathione synthetase_ isoform F OS=Drosophila melanogaster OX=7227 GN=Gss1 PE=1 SV=4	1374.63	1493.1	1365.25	1411	3.14953	0.0505036	3	804	1366.59	1403.1	1271.14	1346.94	3.12935	0.0505877	3	824	0.954603	-0.0670276	0.323419
Q7K0E6	20	15	86.1626	0.837463	0.0770345	0.237733	1.01139	0.0534063	Experimental_No_Manganese	Control_Manganese	59344.4	Aspartyl-tRNA synthetase_ isoform A OS=Drosophila melanogaster OX=7227 GN=AspRS PE=1 SV=1	1390.87	1369.02	1470.07	1409.99	3.14922	0.0377092	3	805	1532.84	1331.13	1414.16	1426.04	3.15413	0.0710913	3	798	1.01139	0.016335	0.820013
Q9VQL1	12	8	63.1302	3.77378e-05	4.42322	0.00040248	3.40163	1	Experimental_No_Manganese	Control_Manganese	56968.9	LP20978p OS=Drosophila melanogaster OX=7227 GN=SerRS PE=1 SV=1	1358.33	1439.52	1429.78	1409.21	3.14898	0.0314559	3	806	5331.89	4364.58	4684.36	4793.61	3.68066	0.102808	3	277	3.40163	1.76623	0.000290666
Q9VG79	10	5	43.6739	0.442935	0.35366	0.152412	1.05645	0.102092	Control_Manganese	Experimental_No_Manganese	55273	Dipeptidase C_ isoform A OS=Drosophila melanogaster OX=7227 GN=Dip-C PE=1 SV=2	1289.91	1395.68	1533.34	1406.31	3.14808	0.0867963	3	807	1267.05	1290.33	1436.13	1331.17	3.12423	0.0688438	3	829	0.946569	-0.0792201	0.441893
P20477;E1JHQ1	5	2	26.421	0.00339864	2.46869	0.00500338	1.38048	0.993971	Control_Manganese	Experimental_No_Manganese	44795.2	Glutamine synthetase 1_ mitochondrial OS=Drosophila melanogaster OX=7227 GN=Gs1 PE=2 SV=3	1514.44	1335.56	1364.7	1404.9	3.14765	0.0683166	3	808	1065.71	1036.35	951.001	1017.69	3.00762	0.0585545	3	957	0.724385	-0.465171	0.0040366
Q9VM50	5	2	27.741	0.541496	0.266405	0.175221	1.05578	0.081857	Control_Manganese	Experimental_No_Manganese	24599.5	RE14786p OS=Drosophila melanogaster OX=7227 GN=Rab30 PE=2 SV=1	1357.25	1442.02	1407.35	1402.21	3.14681	0.030395	3	809	1104.03	1379.65	1500.68	1328.12	3.12324	0.153063	3	831	0.947165	-0.0783127	0.570144
Q9VI55;A0A0B4K6K7;Q9VI55-2	13	5	59.9729	0.897898	0.046773	0.250702	1.04152	0.0513271	Control_Manganese	Experimental_No_Manganese	87995.9	E3 UFM1-protein ligase 1 homolog OS=Drosophila melanogaster OX=7227 GN=Ufl1 PE=2 SV=1	990.028	1644.68	1547.61	1394.11	3.1443	0.253419	3	811	1106.02	1379.25	1530.32	1338.53	3.12663	0.160671	3	825	0.960135	-0.0586912	0.827389
P07192	8	6	42.4378	0.004	2.39794	0.00558419	1.1269	0.99014	Control_Manganese	Experimental_No_Manganese	65462.8	Maltase A3 OS=Drosophila melanogaster OX=7227 GN=Mal-A3 PE=2 SV=2	1410.95	1368.88	1373.93	1384.58	3.14132	0.016591	3	813	1266.29	1228.75	1190.95	1228.66	3.08943	0.0306587	3	867	0.887386	-0.172366	0.00360802
Q9VFZ4	4	4	22.467	0.126135	0.899165	0.0603492	1.09703	0.316721	Control_Manganese	Experimental_No_Manganese	55361.2	Uncharacterized protein OS=Drosophila melanogaster OX=7227 GN=Dmel\CG7966 PE=1 SV=2	1488.73	1292.36	1331.68	1370.92	3.13701	0.0757883	3	814	1298.72	1220.89	1229.4	1249.67	3.0968	0.0341635	3	851	0.911552	-0.133603	0.134881
A0A0B4KHN1;Q7KSF4;Q9VEN1;A0A0B4JCY6;A0A0B4KGT8;A0A0B4KGB3;A4V310;B7Z0L2;Q9VEN1-2	12	10	48.0525	0.120114	0.920407	0.0583251	1.05543	0.328026	Control_Manganese	Experimental_No_Manganese	261687	Cheerio_ isoform N OS=Drosophila melanogaster OX=7227 GN=cher PE=1 SV=1	1373.17	1325.52	1372.17	1356.96	3.13257	0.0200654	3	816	1284.06	1230.73	1342.29	1285.69	3.10914	0.0433981	3	842	0.947484	-0.0778265	0.117713
Q9VPE2	11	6	62.184	0.510571	0.291944	0.167854	1.09047	0.0873578	Control_Manganese	Experimental_No_Manganese	47049.9	NADH dehydrogenase (Ubiquinone) 39 kDa subunit_ isoform A OS=Drosophila melanogaster OX=7227 GN=ND-39 PE=1 SV=1	1486.49	1471.1	1113.11	1356.9	3.13255	0.155698	3	817	1393.47	1214	1125.5	1244.32	3.09493	0.109725	3	856	0.917033	-0.124954	0.481514
P82712;A0A0B4LF45;Q7KR10	17	11	78.3941	0.0829904	1.08097	0.0439632	1.05867	0.419439	Experimental_No_Manganese	Control_Manganese	60381.9	Probable cytochrome P450 12d1 proximal_ mitochondrial OS=Drosophila melanogaster OX=7227 GN=Cyp12d1-p PE=2 SV=3	1316.37	1330.73	1391.84	1346.31	3.12915	0.0297696	3	819	1438.68	1461.13	1376.1	1425.3	3.15391	0.0309161	3	799	1.05867	0.0822535	0.0832276
Q9VQG4	3	1	21.5143	0.106045	0.97451	0.0526713	1.53088	0.357699	Experimental_No_Manganese	Control_Manganese	33294.6	Congested-like trachea protein OS=Drosophila melanogaster OX=7227 GN=colt PE=2 SV=1	1148.09	918.197	1970.41	1345.57	3.1289	0.411131	3	820	2111.01	2156.22	1912.46	2059.9	3.31385	0.0629474	3	640	1.53088	0.614358	0.0950084
A1Z892	10	2	47.5086	0.00224454	2.64887	0.00388342	1.35283	0.998619	Control_Manganese	Experimental_No_Manganese	24955.5	LD11278p OS=Drosophila melanogaster OX=7227 GN=Prx2540-1 PE=2 SV=1	1261.96	1258.84	1427.23	1316.01	3.11926	0.0732001	3	824	949.087	984.203	985.046	972.779	2.98801	0.0210963	3	977	0.739189	-0.435985	0.00379868
Q23997;A0A0B4LFJ1	5	1	22.7482	0.0138226	1.85941	0.013153	1.1689	0.872587	Experimental_No_Manganese	Control_Manganese	50696.6	Imaginal disk growth factor 6 OS=Drosophila melanogaster OX=7227 GN=Idgf6 PE=1 SV=2	1284.78	1359.02	1300.23	1314.68	3.11882	0.0297958	3	825	1577.24	1595.15	1437.78	1536.72	3.1866	0.0560626	3	769	1.1689	0.22515	0.0153008
A1Z784;A8DY67;Q7JV23	17	8	82.1247	0.205158	0.687912	0.0862311	1.0878	0.215874	Experimental_No_Manganese	Control_Manganese	280022	Acetyl-CoA carboxylase_ isoform A OS=Drosophila melanogaster OX=7227 GN=ACC PE=1 SV=1	1239.02	1239.38	1463.6	1314	3.1186	0.098599	3	826	1452.67	1385.61	1449.83	1429.37	3.15514	0.0265331	3	797	1.0878	0.121411	0.212925
Q27580;X2JF40;M9PHN8	7	3	33.9585	0.684611	0.164556	0.20585	1.01496	0.0636279	Experimental_No_Manganese	Control_Manganese	47993.9	Adenosylhomocysteinase OS=Drosophila melanogaster OX=7227 GN=Ahcy PE=1 SV=2	1389.15	1310.37	1232.62	1310.72	3.11751	0.0597119	3	827	1356.15	1303.15	1331.67	1330.32	3.12396	0.0199387	3	830	1.01496	0.0214188	0.702204
M9PB79;E1JHC2;M9MRF4;Q0E8S1;Q8SZR2;Q9VLE4	4	1	15.6943	0.268518	0.571027	0.105595	1.1397	0.169618	Control_Manganese	Experimental_No_Manganese	79275.6	Uncharacterized protein_ isoform G OS=Drosophila melanogaster OX=7227 GN=CG9584 PE=4 SV=1	1088.19	1367.38	1474.99	1310.18	3.11733	0.152377	3	828	1164.43	1084.43	1199.89	1149.58	3.06054	0.0514503	3	902	0.877422	-0.188658	0.252511
Q9V3V9	5	2	27.184	0.619438	0.208002	0.192475	1.01438	0.0706497	Experimental_No_Manganese	Control_Manganese	40899.5	Endonuclease G inhibitor_ isoform A OS=Drosophila melanogaster OX=7227 GN=EndoGI PE=1 SV=1	1338.34	1313.23	1241.89	1297.82	3.11321	0.0385556	3	830	1295.42	1356.61	1297.43	1316.49	3.11942	0.0264053	3	834	1.01438	0.020604	0.623732
Q9VZ64	3	2	15.8163	0.00260575	2.58407	0.00433434	1.37814	0.99756	Experimental_No_Manganese	Control_Manganese	27014	Probable 6-phosphogluconolactonase OS=Drosophila melanogaster OX=7227 GN=CG17333 PE=2 SV=1	1286.36	1259.2	1337.18	1294.25	3.11202	0.0305822	3	831	1945.3	1701.29	1704.37	1783.65	3.25131	0.0784912	3	704	1.37814	0.462721	0.00432252
Q9VCC6	7	3	40.3139	0.50348	0.298018	0.166576	1.08963	0.0887181	Control_Manganese	Experimental_No_Manganese	60281	GM05240p OS=Drosophila melanogaster OX=7227 GN=FACL PE=1 SV=1	1085.69	1378.32	1410.3	1291.44	3.11107	0.138528	3	832	1013.74	1202.59	1339.29	1185.21	3.07379	0.137926	3	886	0.917744	-0.123836	0.489993
M9PDQ9;Q9VPK3	5	3	18.2723	0.665225	0.177031	0.2023	1.0484	0.0655231	Control_Manganese	Experimental_No_Manganese	47903.9	Uncharacterized protein_ isoform D OS=Drosophila melanogaster OX=7227 GN=CG18501 PE=4 SV=1	1362.84	1082.2	1424.83	1289.96	3.11058	0.141532	3	833	1247.82	1191.15	1252.24	1230.4	3.09005	0.0276857	3	866	0.953831	-0.0681939	0.608205
Q0KIF2;A0A023GQ97;Q9V4E9	7	2	34.1474	0.0493317	1.30687	0.0305609	1.13868	0.560617	Control_Manganese	Experimental_No_Manganese	103453	Eye-enriched kainate receptor_ isoform B OS=Drosophila melanogaster OX=7227 GN=Ekar PE=3 SV=1	1191.56	1349.4	1326.23	1289.06	3.11027	0.0661169	3	834	1108.21	1189.1	1098.9	1132.07	3.05387	0.0438189	3	909	0.87821	-0.187363	0.0509823
Q7KVK5;Q8MME7	5	2	24.2747	0.000863249	3.06386	0.00216307	1.37051	0.99999	Experimental_No_Manganese	Control_Manganese	153727	Uncharacterized protein_ isoform M OS=Drosophila melanogaster OX=7227 GN=CG13520 PE=4 SV=2	1222.62	1297.52	1336.83	1285.66	3.10912	0.045132	3	835	1700.78	1743.52	1841.71	1762	3.24601	0.041009	3	710	1.37051	0.454713	0.00087968
A0A0B4KF99;A0A0B4KEL0;A0A0C4DHC8;A1Z6Z3;A1Z6Z4;A0A0B4KEE1;A0A0C4FEI5;A4UZ69;Q7JR61	17	15	66.4565	0.0215586	1.66638	0.01752	1.12549	0.779846	Control_Manganese	Experimental_No_Manganese	56854.3	Aldehyde dehydrogenase OS=Drosophila melanogaster OX=7227 GN=Aldh-III PE=1 SV=1	1219.81	1351.09	1250.23	1273.71	3.10507	0.0539469	3	836	1113.6	1148.29	1133.18	1131.69	3.05373	0.0153652	3	910	0.888498	-0.170559	0.0255713
Q9W1S5	4	2	22.31	0.197123	0.705263	0.0835728	1.03735	0.22333	Control_Manganese	Experimental_No_Manganese	35749.1	Proteasome subunit beta OS=Drosophila melanogaster OX=7227 GN=Prosbeta5R1 PE=2 SV=1	1265.79	1278.32	1270.28	1271.47	3.10431	0.00499153	3	837	1236.31	1170.79	1269.96	1225.69	3.08838	0.0411455	3	870	0.963994	-0.0529039	0.193772
A0A0B4LFB3;Q7JVI3	10	7	61.8298	0.369725	0.432121	0.134565	1.0703	0.123684	Experimental_No_Manganese	Control_Manganese	44543.1	Eukaryotic translation initiation factor 3 subunit M OS=Drosophila melanogaster OX=7227 GN=eIF3m PE=3 SV=1	1351.64	1119.24	1332.41	1267.77	3.10304	0.101742	3	838	1428.74	1371.21	1270.72	1356.89	3.13254	0.0589392	3	815	1.0703	0.0980153	0.366606
Q9VNX4	6	5	28.3064	0.24173	0.61667	0.0975056	1.0862	0.186855	Experimental_No_Manganese	Control_Manganese	64237.4	Delta-1-Pyrroline-5-carboxylate dehydrogenase 1_ isoform A OS=Drosophila melanogaster OX=7227 GN=P5CDh1 PE=1 SV=1	1165.46	1325.4	1310.68	1267.18	3.10284	0.0697589	3	839	1266.78	1390.43	1472	1376.4	3.13875	0.0750698	3	812	1.0862	0.119284	0.23653
O18332	9	4	49.4713	0.0171941	1.76462	0.0150024	1.14593	0.830224	Experimental_No_Manganese	Control_Manganese	23047.9	FI01544p OS=Drosophila melanogaster OX=7227 GN=Rab1 PE=1 SV=1	1297.7	1225.28	1273.72	1265.57	3.10229	0.0291513	3	840	1408.68	1538.87	1403.22	1450.26	3.16145	0.0529512	3	792	1.14593	0.196523	0.0198643
Q9W4H6;Q7KVX1	16	3	100.521	0.045274	1.34415	0.0291554	1.02693	0.584498	Control_Manganese	Experimental_No_Manganese	44348.2	Pyruvate dehydrogenase E1 component subunit alpha OS=Drosophila melanogaster OX=7227 GN=Pdha PE=1 SV=2	1274.74	1268.7	1248.57	1264	3.10175	0.0108387	3	841	1215.18	1243.7	1233.66	1230.85	3.0902	0.0117519	3	865	0.973772	-0.0383436	0.0449168
A1ZAZ8	9	3	46.9989	0.0864901	1.06303	0.0452589	1.08806	0.408754	Control_Manganese	Experimental_No_Manganese	72332.1	Uncharacterized protein OS=Drosophila melanogaster OX=7227 GN=EG:52C10.6 PE=4 SV=1	1245.24	1263.69	1251.6	1253.51	3.09813	0.00747401	3	843	1104.87	1110.92	1240.4	1152.06	3.06148	0.0664552	3	900	0.91907	-0.121754	0.0849674
Q9VRJ4	4	2	20.2983	0.0400689	1.39719	0.0269581	1.1159	0.618384	Control_Manganese	Experimental_No_Manganese	33845.7	SD02021p OS=Drosophila melanogaster OX=7227 GN=DHRS4 PE=1 SV=1	1240.53	1295.57	1221.68	1252.59	3.09781	0.0306515	3	844	1189.27	1063.62	1114.58	1122.49	3.05018	0.0562975	3	913	0.896135	-0.158213	0.0381205
Q9W374	17	10	79.9123	0.474107	0.324124	0.160177	1.08181	0.0947892	Control_Manganese	Experimental_No_Manganese	113222	Dihydropyrimidine dehydrogenase [NADP(+)] OS=Drosophila melanogaster OX=7227 GN=su(r) PE=1 SV=2	1477.68	1125.97	1145.71	1249.79	3.09684	0.158113	3	845	1200.05	1143.51	1122.26	1155.27	3.06268	0.0348026	3	899	0.924378	-0.113445	0.462467
Q9VJ28	7	6	34.5286	0.410252	0.386949	0.143979	1.06685	0.110866	Experimental_No_Manganese	Control_Manganese	50584.1	FI05204p OS=Drosophila melanogaster OX=7227 GN=L2HGDH PE=1 SV=1	1253.05	1095.34	1400.82	1249.74	3.09682	0.122241	3	846	1271.64	1345.71	1382.5	1333.29	3.12492	0.0423479	3	828	1.06685	0.0933589	0.424483
Q9VKX6	7	3	27.001	0.0371605	1.42992	0.0255306	1.05127	0.639142	Control_Manganese	Experimental_No_Manganese	55520.3	RE59088p OS=Drosophila melanogaster OX=7227 GN=Dmel\CG5096 PE=2 SV=2	1212.16	1244.19	1276.15	1244.16	3.09488	0.0257154	3	847	1192.19	1168.22	1190.06	1183.49	3.07316	0.0112098	3	887	0.951233	-0.0721289	0.0386229
Q07327;M9PEL1	9	4	42.2188	0.87286	0.0590555	0.245152	1.00979	0.0520672	Experimental_No_Manganese	Control_Manganese	68592.5	Protein ROP OS=Drosophila melanogaster OX=7227 GN=Rop PE=2 SV=2	1443.86	1160.39	1125.45	1243.23	3.09455	0.140461	3	849	1166.31	1293.93	1305.98	1255.4	3.09878	0.0616481	3	848	1.00979	0.0140542	0.917439
O02373	14	9	71.3898	0.048685	1.3126	0.0303519	1.20773	0.564288	Experimental_No_Manganese	Control_Manganese	53502	UDP-glucose 6-dehydrogenase OS=Drosophila melanogaster OX=7227 GN=sgl PE=1 SV=1	1269.36	1087.44	1372.57	1243.12	3.09451	0.116128	3	850	1527.1	1492.69	1484.29	1501.36	3.17648	0.015108	3	777	1.20773	0.272297	0.0376314
Q9VIL4	4	2	15.3867	0.596218	0.224595	0.187884	1.07819	0.0736342	Control_Manganese	Experimental_No_Manganese	24223.1	GH26094p OS=Drosophila melanogaster OX=7227 GN=38D.25 PE=2 SV=2	983.993	1335.16	1383.69	1234.28	3.09141	0.17671	3	851	1072.77	1157.44	1204.11	1144.78	3.05872	0.0581598	3	903	0.927484	-0.108606	0.533933
P32392	4	3	21.1552	0.611928	0.2133	0.190619	1.02613	0.0715849	Control_Manganese	Experimental_No_Manganese	47488.9	Actin-related protein 3 OS=Drosophila melanogaster OX=7227 GN=Arp3 PE=2 SV=3	1321.54	1152.01	1186.19	1219.91	3.08633	0.073493	3	855	1190.61	1158.74	1217.19	1188.85	3.07513	0.024616	3	884	0.974533	-0.0372169	0.598817
Q9W0C5;Q7KVB1	11	5	58.2975	0.960182	0.0176464	0.26413	1.00081	0.0502004	Experimental_No_Manganese	Control_Manganese	80923.1	ATP binding cassette subfamily B member 7_ isoform A OS=Drosophila melanogaster OX=7227 GN=ABCB7 PE=1 SV=2	1256.49	1141.54	1252.05	1216.69	3.08518	0.0535223	3	856	1219.77	1199.96	1233.3	1217.68	3.08553	0.0137695	3	872	1.00081	0.00116653	0.98099
Q9VCW1	5	3	22.225	0.208851	0.680163	0.0870699	1.04566	0.212594	Control_Manganese	Experimental_No_Manganese	59467.6	Probable cytochrome P450 6d4 OS=Drosophila melanogaster OX=7227 GN=Cyp6d4 PE=2 SV=1	1260.7	1231.33	1145.64	1212.56	3.0837	0.0493025	3	858	1152.48	1172.32	1154.02	1159.61	3.06431	0.00951884	3	895	0.956334	-0.0644141	0.20591
P22465;P22465-2	12	8	59.8264	0.000499371	3.30158	0.00168277	1.30826	1	Control_Manganese	Experimental_No_Manganese	35933.7	Annexin B10 OS=Drosophila melanogaster OX=7227 GN=AnxB10 PE=2 SV=3	1255.82	1161.18	1218.83	1211.94	3.08348	0.0393545	3	859	903.694	934.259	941.179	926.377	2.96679	0.0215317	3	998	0.764374	-0.387649	0.000666817
O97102	3	2	12.9395	0.707611	0.150205	0.211145	1.01903	0.0615737	Experimental_No_Manganese	Control_Manganese	10181.5	Small ubiquitin-related modifier OS=Drosophila melanogaster OX=7227 GN=smt3 PE=1 SV=1	1194.45	1156.45	1277.17	1209.36	3.08255	0.0510403	3	861	1275.3	1274.9	1146.9	1232.37	3.09074	0.060064	3	864	1.01903	0.0271933	0.700424
X2JEJ0;A8JV22;Q9W3F6;A8JV24	9	7	52.0875	0.274909	0.560811	0.107568	1.09024	0.165905	Control_Manganese	Experimental_No_Manganese	63270.4	Uncharacterized protein_ isoform D OS=Drosophila melanogaster OX=7227 GN=Dmel\CG1440 PE=1 SV=1	1337.87	1119.64	1166.15	1207.89	3.08203	0.0951619	3	862	1191.89	1094.27	1037.56	1107.91	3.0445	0.0704621	3	919	0.917228	-0.124648	0.280663
A0A0B4LH29;Q9W2J5	8	5	41.3715	0.946693	0.0237907	0.261609	1.00272	0.0503596	Control_Manganese	Experimental_No_Manganese	49703.2	Uncharacterized protein_ isoform B OS=Drosophila melanogaster OX=7227 GN=CG9480 PE=1 SV=1	1177.95	1169.98	1274.48	1207.47	3.08188	0.0481762	3	863	1209.76	1209.8	1193.01	1204.19	3.08069	0.00803946	3	874	0.997283	-0.00392453	0.927882
Q9VEJ0	14	9	45.191	0.0273527	1.563	0.0205615	1.10678	0.720986	Experimental_No_Manganese	Control_Manganese	26550.4	Peroxiredoxin 3 OS=Drosophila melanogaster OX=7227 GN=Prx3 PE=1 SV=2	1256.49	1186.38	1177.11	1206.66	3.08158	0.0359689	3	864	1383.47	1339.23	1283.83	1335.51	3.12565	0.0373789	3	827	1.10678	0.146374	0.0279438
P42280	4	3	15.2476	0.00443983	2.35263	0.00598448	1.27518	0.986794	Control_Manganese	Experimental_No_Manganese	30079.9	Trypsin zeta OS=Drosophila melanogaster OX=7227 GN=zetaTry PE=2 SV=2	1137.41	1219.09	1253.6	1203.36	3.0804	0.0495865	3	865	890.028	987.48	953.547	943.685	2.97483	0.052421	3	989	0.784205	-0.350697	0.00438674
Q9VRR3	4	2	15.059	0.00082477	3.08367	0.00214389	1.78694	0.999993	Control_Manganese	Experimental_No_Manganese	28201.5	Uncharacterized protein_ isoform A OS=Drosophila melanogaster OX=7227 GN=Dmel\CG32407 PE=1 SV=2	1326.89	1167.71	1105.92	1200.17	3.07924	0.0949916	3	866	700.016	626.946	687.941	671.634	2.82713	0.0583197	3	1132	0.559615	-0.837494	0.00161298
Q9W303;X2JEB6	9	8	52.9868	7.03449e-05	4.15277	0.000490084	2.00261	1	Experimental_No_Manganese	Control_Manganese	48832.3	Chitinase-like protein Idgf4 OS=Drosophila melanogaster OX=7227 GN=Idgf4 PE=2 SV=1	1145.34	1241.84	1210.16	1199.11	3.07886	0.0410215	3	867	2262.38	2404.17	2537.5	2401.35	3.38046	0.0572923	3	576	2.00261	1.00188	0.000140774
Q9VYV3;Q9VYV3-2	14	6	64.8869	0.723352	0.14065	0.214275	1.00968	0.060283	Control_Manganese	Experimental_No_Manganese	47391.6	Thioredoxin domain-containing protein 5 homolog OS=Drosophila melanogaster OX=7227 GN=prtp PE=1 SV=2	1158.49	1218.68	1220.1	1199.09	3.07885	0.0293289	3	868	1158.29	1172.05	1232.43	1187.59	3.07467	0.033207	3	885	0.990409	-0.0139039	0.725332
Q9VJ57	4	1	17.4719	0.0262269	1.58125	0.0200233	1.31828	0.731744	Experimental_No_Manganese	Control_Manganese	72522	Grip71 OS=Drosophila melanogaster OX=7227 GN=Grip71 PE=1 SV=2	1292.9	1016.83	1277	1195.58	3.07758	0.129648	3	869	1613.44	1500.11	1614.75	1576.1	3.19758	0.0417572	3	756	1.31828	0.398652	0.0173371
Q9VN13	3	2	13.8075	0.983533	0.007211	0.268663	1.00061	0.0500342	Experimental_No_Manganese	Control_Manganese	36086	Sideroflexin-1-3 OS=Drosophila melanogaster OX=7227 GN=Sfxn1-3 PE=2 SV=1	1153.65	1206.89	1209.43	1189.99	3.07554	0.0264679	3	870	1089.78	1241.39	1240.96	1190.71	3.07581	0.0734085	3	883	1.00061	0.000873983	0.989918
Q9VGF7	5	3	28.5304	0.000344373	3.46297	0.00130692	1.77114	1	Experimental_No_Manganese	Control_Manganese	34841.7	Glutamate carrier 1_ isoform A OS=Drosophila melanogaster OX=7227 GN=GC1 PE=1 SV=1	1294.46	1158.94	1108.5	1187.3	3.07456	0.0809994	3	871	2171.48	2114.5	2022.62	2102.87	3.32281	0.035716	3	632	1.77114	0.824676	0.000202284
Q9VPL8	2	1	8.9241	0.142681	0.845634	0.0655383	1.09111	0.28914	Experimental_No_Manganese	Control_Manganese	51517.1	Uncharacterized protein OS=Drosophila melanogaster OX=7227 GN=Dmel\CG13693 PE=4 SV=1	1235.11	1140.47	1175.24	1183.6	3.07321	0.0404461	3	872	1301.44	1377.37	1195.53	1291.45	3.11108	0.0707173	3	840	1.09111	0.1258	0.144302
Q9I7U4-2;M9NDX0	14	6	61.2825	0.654712	0.18395	0.19994	1.01542	0.0666169	Experimental_No_Manganese	Control_Manganese	552761	Isoform A of Titin OS=Drosophila melanogaster OX=7227 GN=sls	1148.31	1236	1161.02	1181.78	3.07254	0.0400996	3	873	1150.22	1210.11	1239.68	1200	3.07918	0.0379825	3	879	1.01542	0.0220825	0.656184
Q9VJ59	5	3	18.78	1.11639e-05	4.95219	0.000201699	1.65892	1	Experimental_No_Manganese	Control_Manganese	27796.4	PRA1 family protein OS=Drosophila melanogaster OX=7227 GN=Jwa PE=1 SV=5	1208.57	1137.98	1177.31	1174.62	3.0699	0.0301163	3	874	1975.24	1939.27	1931.28	1948.6	3.28972	0.0120179	3	662	1.65892	0.730244	5.97789e-06
Q9VGE7	5	1	21.8013	0.498345	0.30247	0.165527	1.0647	0.0897279	Control_Manganese	Experimental_No_Manganese	72182.3	Beta-galactosidase OS=Drosophila melanogaster OX=7227 GN=Ect3 PE=1 SV=1	1303.33	1025.12	1179.58	1169.34	3.06794	0.119202	3	875	1107.37	1167.11	1020.38	1098.28	3.04071	0.0671833	3	924	0.939234	-0.090444	0.478773
Q8INH7	12	7	57.4714	0.593018	0.226932	0.187394	1.07858	0.0740675	Experimental_No_Manganese	Control_Manganese	160390	Timeout OS=Drosophila melanogaster OX=7227 GN=timeout PE=1 SV=2	793.527	1348.71	1364.64	1168.96	3.0678	0.278223	3	876	1196.88	1280.25	1305.32	1260.81	3.10065	0.0450282	3	847	1.07858	0.109131	0.65506
Q94521;Q94521-2	7	5	35.581	0.00845362	2.07296	0.00949558	1.2233	0.94285	Control_Manganese	Experimental_No_Manganese	31375	Dopamine N-acetyltransferase OS=Drosophila melanogaster OX=7227 GN=AANAT1 PE=1 SV=1	1129.26	1187.6	1188.29	1168.38	3.06759	0.0290011	3	877	889.559	1015.66	960.112	955.11	2.98005	0.0661695	3	986	0.817462	-0.290776	0.00673817
Q7K3N1	4	3	18.1931	0.0576178	1.23944	0.0340079	1.18919	0.517578	Control_Manganese	Experimental_No_Manganese	67444.4	GH27401p OS=Drosophila melanogaster OX=7227 GN=HPS1 PE=2 SV=1	1275.23	1122.31	1100.57	1166.03	3.06671	0.0816337	3	878	1069.83	957.735	914.008	980.525	2.99146	0.0819686	3	972	0.840905	-0.249984	0.0613828
Q7KVQ0	3	2	15.826	0.235795	0.627465	0.0953685	1.04266	0.191087	Control_Manganese	Experimental_No_Manganese	22779.1	Probable H/ACA ribonucleoprotein complex subunit 1 OS=Drosophila melanogaster OX=7227 GN=CG4038 PE=2 SV=1	1138.7	1125.46	1227.15	1163.77	3.06587	0.0475067	3	879	1090.74	1123.67	1134.07	1116.16	3.04773	0.0202656	3	916	0.959088	-0.0602654	0.239545
Q9W2G9	6	3	30.9388	3.46608e-07	6.46016	4.58732e-05	1.9325	1	Experimental_No_Manganese	Control_Manganese	76517	Acyl-coenzyme A oxidase OS=Drosophila melanogaster OX=7227 GN=Acox57D-p PE=1 SV=1	1170.65	1176.05	1143.63	1163.44	3.06574	0.0149314	3	880	2238.43	2272.71	2233.92	2248.35	3.35186	0.00943451	3	602	1.9325	0.950469	2.71548e-07
F6J1D0;P40423	3	2	17.7253	0.607715	0.2163	0.189889	1.03621	0.072122	Experimental_No_Manganese	Control_Manganese	20011.5	CG3595 OS=Drosophila melanogaster OX=7227 GN=sqh PE=1 SV=1	1000.78	1249.51	1229.31	1159.87	3.06441	0.119103	3	882	1206.55	1172.97	1226.07	1201.86	3.07986	0.0223467	3	877	1.03621	0.0513116	0.63252
Q7JVH6	9	5	47.9567	0.49577	0.304719	0.165109	1.0477	0.0902419	Control_Manganese	Experimental_No_Manganese	35760.3	LD24696p OS=Drosophila melanogaster OX=7227 GN=Dmel\CG9436 PE=1 SV=1	1187.66	1240.69	1025.19	1151.18	3.06114	0.0975407	3	885	1091.19	1096.2	1108.91	1098.77	3.04091	0.00830984	3	923	0.95447	-0.0672289	0.465516
Q9VW54	3	1	13.3185	0.613667	0.212067	0.190834	1.03971	0.0713658	Control_Manganese	Experimental_No_Manganese	103076	26S proteasome non-ATPase regulatory subunit 2 OS=Drosophila melanogaster OX=7227 GN=Rpn1 PE=1 SV=2	1034.83	1243.48	1172.74	1150.35	3.06083	0.0922429	3	886	1157.61	1013.03	1148.58	1106.41	3.04391	0.0731993	3	920	0.961803	-0.0561867	0.59908
Q9VMJ4	7	3	35.5193	0.0229291	1.63961	0.0183289	1.13071	0.765119	Control_Manganese	Experimental_No_Manganese	106488	Uncharacterized protein_ isoform A OS=Drosophila melanogaster OX=7227 GN=Dmel\CG9098 PE=4 SV=2	1191.52	1127.32	1125.74	1148.19	3.06001	0.0326886	3	887	985.106	986.519	1074.76	1015.46	3.00666	0.050578	3	959	0.8844	-0.177229	0.0224764
M9NCX1;M9PBJ2;P08111;P08111-2;P08111-3;P08111-4	5	5	22.291	0.00439176	2.35736	0.00594017	1.18729	0.987181	Control_Manganese	Experimental_No_Manganese	128147	Lethal (2) giant larvae_ isoform G OS=Drosophila melanogaster OX=7227 GN=l(2)gl PE=4 SV=1	1143.38	1154.67	1142.97	1147.01	3.05957	0.00578943	3	888	948.218	1022.56	927.433	966.071	2.98501	0.0517716	3	980	0.842252	-0.247676	0.00341836
M9PCI5;Q9VLS1	4	2	20.2463	0.789526	0.102634	0.228408	1.0083	0.0557952	Experimental_No_Manganese	Control_Manganese	126687	Phosphorylase b kinase regulatory subunit OS=Drosophila melanogaster OX=7227 GN=Dmel\CG8475 PE=3 SV=1	1168.08	1074.74	1195.25	1146.02	3.05919	0.055155	3	889	1147.4	1163.73	1155.48	1155.54	3.06278	0.00706867	3	898	1.0083	0.0119307	0.808689
A0A0B4KGE1;A0A0B4KGI7;A0A0B4KHS7;Q24151;Q24151-2;A0A0B4KH10;A0A0B4KHS6;Q24151-3;Q24151-4	4	1	16.0874	0.788101	0.103418	0.228349	1.02062	0.0558767	Experimental_No_Manganese	Control_Manganese	93314.9	Signal transducer and activator of transcription OS=Drosophila melanogaster OX=7227 GN=Stat92E PE=3 SV=1	1175.08	1116.47	1137.3	1142.95	3.05803	0.0259978	3	891	1208.07	1036.84	1254.64	1166.51	3.06689	0.0983188	3	893	1.02062	0.0294401	0.747838
Q9V3D2;X2J9R2	2	1	9.6716	0.08077	1.09275	0.0432499	1.18312	0.426511	Control_Manganese	Experimental_No_Manganese	44818.8	Oxygen-dependent coproporphyrinogen-III oxidase OS=Drosophila melanogaster OX=7227 GN=Coprox PE=2 SV=1	1177.56	1062.74	1184.77	1141.69	3.05755	0.0599738	3	892	1013.77	1036.06	845.118	964.979	2.98452	0.108189	3	982	0.84522	-0.242601	0.0703311
Q9V9Q1	7	3	31.4154	0.0231549	1.63536	0.0184717	1.22616	0.762742	Control_Manganese	Experimental_No_Manganese	74139.6	Uncharacterized protein OS=Drosophila melanogaster OX=7227 GN=Dmel\CG11630 PE=4 SV=1	1244.32	1085.26	1087.88	1139.15	3.05658	0.0799593	3	894	984.46	928.264	874.397	929.04	2.96803	0.059239	3	996	0.815554	-0.294147	0.0267888
P40945;L0MNA8	9	5	44.5638	0.0107412	1.96895	0.0111667	1.18926	0.913051	Experimental_No_Manganese	Control_Manganese	20730.9	ADP-ribosylation factor 2 OS=Drosophila melanogaster OX=7227 GN=Arf102F PE=2 SV=2	1177.62	1110.44	1126.98	1138.35	3.05628	0.0307455	3	895	1407.56	1389.81	1264	1353.79	3.13155	0.0578101	3	820	1.18926	0.250062	0.0121324
Q9VN44	8	6	44.7965	0.0910213	1.04086	0.046877	1.12666	0.395694	Experimental_No_Manganese	Control_Manganese	125158	FI07923p OS=Drosophila melanogaster OX=7227 GN=Karybeta3 PE=1 SV=1	1239.12	1029.35	1139.01	1135.83	3.05531	0.0923741	3	897	1297.84	1293.1	1248.15	1279.7	3.10711	0.0214287	3	844	1.12666	0.172057	0.0831393
O97069	5	3	23.3196	0.705929	0.151239	0.210966	1.03183	0.0617171	Control_Manganese	Experimental_No_Manganese	47050.8	Argininosuccinate synthase OS=Drosophila melanogaster OX=7227 GN=Ass PE=2 SV=1	1032.84	1268.27	1104.02	1135.04	3.05501	0.106376	3	898	1067.06	1186.46	1046.58	1100.03	3.04141	0.068672	3	922	0.969155	-0.0452003	0.69219
Q9W058;M9PGX7;Q9W058-2	5	4	17.0198	0.0368852	1.43315	0.0254872	1.31725	0.641181	Experimental_No_Manganese	Control_Manganese	55189.7	Succinyl-CoA:3-ketoacid-coenzyme A transferase_ mitochondrial OS=Drosophila melanogaster OX=7227 GN=SCOT PE=1 SV=1	1233.55	993.213	1175.23	1134	3.05461	0.110548	3	899	1669.86	1454.09	1357.33	1493.76	3.17428	0.107111	3	778	1.31725	0.397529	0.0374518
M9MRQ6;M9MSK4;Q9NFP5;M9MRR7	5	3	25.6757	0.000188829	3.72393	0.000908718	1.63974	1	Control_Manganese	Experimental_No_Manganese	54288.7	Sh3beta_ isoform E OS=Drosophila melanogaster OX=7227 GN=Sh3beta PE=1 SV=1	1061.01	1177.04	1156.66	1131.57	3.05368	0.0547446	3	900	695.206	709.817	665.257	690.094	2.83891	0.0329169	3	1115	0.609855	-0.713463	0.000316734
Q960M4	3	1	6.0889	0.148855	0.827237	0.0676796	1.09168	0.27997	Control_Manganese	Experimental_No_Manganese	20124.1	Peroxiredoxin OS=Drosophila melanogaster OX=7227 GN=Prx5 PE=1 SV=1	1128.61	1082.66	1181.51	1130.93	3.05343	0.0437389	3	901	1032.85	1114.56	960.437	1035.95	3.01534	0.0744302	3	952	0.916018	-0.126552	0.146965
Q24046;B5RIR1	7	6	36.8431	0.100171	0.999259	0.050524	1.0629	0.371675	Control_Manganese	Experimental_No_Manganese	35708.3	Sodium/potassium-transporting ATPase subunit beta-1 OS=Drosophila melanogaster OX=7227 GN=nrv1 PE=1 SV=2	1123.25	1174.01	1090.46	1129.24	3.05279	0.0372779	3	902	1022.85	1085.85	1078.54	1062.41	3.02629	0.0324312	3	944	0.940819	-0.0880116	0.100449
A0A0B4LGD3;A0A0B4LHE0;Q8MKK5;Q8MLQ5;Q9W1G5;Q9W1G6	9	5	45.5751	0.0119666	1.92203	0.0119068	1.10664	0.896864	Experimental_No_Manganese	Control_Manganese	120846	Kazachoc_ isoform G OS=Drosophila melanogaster OX=7227 GN=kcc PE=1 SV=1	1149.12	1144.51	1090.53	1128.05	3.05233	0.0288817	3	903	1235.79	1221.62	1287.63	1248.34	3.09633	0.0278382	3	852	1.10664	0.146181	0.011932
Q95083	3	2	15.6167	0.134078	0.872642	0.0626561	1.09905	0.302891	Control_Manganese	Experimental_No_Manganese	27111.8	Proteasome subunit alpha type-5 OS=Drosophila melanogaster OX=7227 GN=Prosalpha5 PE=2 SV=2	1144.11	1145.37	1090.61	1126.7	3.05181	0.0277407	3	904	933.786	1037.52	1104.15	1025.15	3.01079	0.0837465	3	954	0.909875	-0.13626	0.126539
Q9VJD1	3	1	14.6589	0.102982	0.987238	0.051543	1.13363	0.364856	Experimental_No_Manganese	Control_Manganese	62452	Glucosidase 2 beta subunit_ isoform A OS=Drosophila melanogaster OX=7227 GN=GCS2beta PE=1 SV=1	1259.05	1055.26	1054.35	1122.88	3.05033	0.10502	3	905	1241.56	1311.24	1266.02	1272.94	3.10481	0.0277717	3	846	1.13363	0.180955	0.102357
E2QCZ9;Q7JZB4	4	2	22.7537	0.464833	0.332703	0.157726	1.09214	0.0968632	Control_Manganese	Experimental_No_Manganese	40961.4	Uncharacterized protein_ isoform B OS=Drosophila melanogaster OX=7227 GN=Dmel\CG1129 PE=1 SV=1	915.232	1210.56	1241.84	1122.54	3.0502	0.160543	3	906	1030.46	1026.99	1026.07	1027.84	3.01193	0.00225536	3	953	0.915636	-0.127153	0.414252
Q9W128	4	2	19.2768	0.947672	0.0233421	0.261609	1.00787	0.0503465	Control_Manganese	Experimental_No_Manganese	53089.9	RE54577p OS=Drosophila melanogaster OX=7227 GN=Dmel\CG4781 PE=1 SV=1	997.767	1130.12	1236.42	1121.43	3.04977	0.106616	3	907	1060.9	1165.65	1111.47	1112.68	3.04637	0.0470781	3	918	0.99219	-0.0113118	0.913082
Q7JR49	5	5	13.4646	0.680398	0.167237	0.204963	1.01548	0.0640267	Experimental_No_Manganese	Control_Manganese	41580	LD09158p OS=Drosophila melanogaster OX=7227 GN=VhaAC45 PE=1 SV=1	1043.19	1181.58	1131.44	1118.73	3.04873	0.0626264	3	908	1117.08	1144.64	1146.42	1136.05	3.0554	0.0144813	3	906	1.01548	0.0221548	0.698316
A4V3J5;A4V3J6;P07909;P07909-2;P07909-3;P07909-4	3	2	14.3664	0.243161	0.614106	0.0977934	1.05874	0.185859	Control_Manganese	Experimental_No_Manganese	39038	Heterogeneous nuclear ribonucleoprotein at 98DE_ isoform C OS=Drosophila melanogaster OX=7227 GN=Hrb98DE PE=1 SV=1	1170.75	1126.01	1037.45	1111.4	3.04587	0.0610418	3	909	1036.92	1020.19	1092.11	1049.74	3.02108	0.0358503	3	947	0.944516	-0.082353	0.240632
Q8SXC2	3	2	15.9328	0.300497	0.522159	0.115209	1.09834	0.152338	Control_Manganese	Experimental_No_Manganese	51601.3	FI04487p OS=Drosophila melanogaster OX=7227 GN=Dmel\CG6950 PE=1 SV=1	1169.64	1117.52	1034.18	1107.11	3.04419	0.0617171	3	910	868.144	1111.19	1044.63	1007.99	3.00346	0.124601	3	963	0.910465	-0.135324	0.296075
Q8T0X8	1	1	4.9325	0.594097	0.226143	0.187584	1.03891	0.0739209	Control_Manganese	Experimental_No_Manganese	21471.7	Chemosensory protein A 29a OS=Drosophila melanogaster OX=7227 GN=CheA29a PE=2 SV=1	1150.49	1177.21	988.81	1105.5	3.04356	0.092211	3	911	1007.69	1065.76	1118.85	1064.1	3.02698	0.0522512	3	940	0.962547	-0.0550707	0.570263
Q9W4P5	10	7	35.0057	0.03355	1.47431	0.0239315	1.14212	0.666986	Experimental_No_Manganese	Control_Manganese	40421.9	V-type proton ATPase subunit d 1 OS=Drosophila melanogaster OX=7227 GN=VhaAC39-1 PE=2 SV=1	1006.7	1143.08	1122	1090.59	3.03766	0.0673175	3	912	1211.76	1273.7	1251.31	1245.59	3.09537	0.0251793	3	855	1.14212	0.191717	0.0282327
A0A0B4KEG2;P91660	3	1	14.8064	0.000409651	3.38759	0.00149654	1.14504	1	Control_Manganese	Experimental_No_Manganese	154025	Lethal (2) 03659_ isoform C OS=Drosophila melanogaster OX=7227 GN=l(2)03659 PE=4 SV=1	1099.44	1104.01	1067.05	1090.17	3.03749	0.0184854	3	913	949.647	963.602	942.969	952.073	2.97867	0.0110582	3	987	0.873329	-0.195403	0.000461745
Q500Y7	2	2	13.7874	0.0356316	1.44816	0.0249566	1.13488	0.650637	Experimental_No_Manganese	Control_Manganese	6275.29	GEO11443p1 OS=Drosophila melanogaster OX=7227 GN=UQCR-6.4 PE=2 SV=1	1129.59	1052.48	1086.59	1089.56	3.03725	0.0354669	3	914	1281.33	1276.11	1152.09	1236.51	3.0922	0.0591617	3	863	1.13488	0.182535	0.0370555
Q9VNA5	6	4	34.7372	0.21893	0.659694	0.0901775	1.11169	0.204073	Experimental_No_Manganese	Control_Manganese	30271.1	Proteasome subunit beta type-4 OS=Drosophila melanogaster OX=7227 GN=Prosbeta7 PE=2 SV=1	1105	1004.25	1130.09	1079.78	3.03333	0.0616839	3	915	1337.91	1178.89	1084.34	1200.38	3.07932	0.106753	3	878	1.11169	0.152757	0.221603
A0A0C4DHG2;Q07171;Q07171-6;A0A0C4DHG6;Q07171-2	8	6	40.3306	0.0943332	1.02534	0.048328	1.08258	0.386657	Experimental_No_Manganese	Control_Manganese	88602.7	Gelsolin_ isoform J OS=Drosophila melanogaster OX=7227 GN=Gel PE=4 SV=1	1065.23	1113.9	1055.25	1078.13	3.03267	0.0291061	3	916	1242	1121.18	1138.3	1167.16	3.06713	0.0560147	3	892	1.08258	0.114474	0.100608
P47949;X2JCI6;A0A0B4LF64	5	1	32.7862	0.0556038	1.2549	0.0331835	1.37171	0.527404	Control_Manganese	Experimental_No_Manganese	17752.9	Troponin C_ isoform 3 OS=Drosophila melanogaster OX=7227 GN=TpnC73F PE=2 SV=2	950.28	1042.62	1237.82	1076.91	3.03218	0.136319	3	917	654.44	885.724	815.079	785.081	2.89491	0.150971	3	1062	0.729015	-0.455979	0.0552888
Q86B58	5	3	30.6884	0.133896	0.873233	0.0626561	1.08047	0.303196	Experimental_No_Manganese	Control_Manganese	31257.1	IP10114p OS=Drosophila melanogaster OX=7227 GN=Dmel\CG33127 PE=1 SV=1	1101.31	1120.41	997.497	1073.07	3.03063	0.061639	3	918	1114.7	1167.2	1196.38	1159.43	3.06424	0.0357027	3	896	1.08047	0.111664	0.127732
Q6NLM7	10	8	52.8452	0.873631	0.0586719	0.245152	1.00811	0.0520419	Experimental_No_Manganese	Control_Manganese	35953.5	LP22879p OS=Drosophila melanogaster OX=7227 GN=CG15018 PE=2 SV=1	927.812	1121.75	1161.2	1070.25	3.02949	0.116726	3	919	1043.14	1122.51	1071.13	1078.93	3.03299	0.0373113	3	932	1.00811	0.0116467	0.914375
Q9VT25	6	2	33.3282	7.19624e-06	5.14289	0.000188771	2.07124	1	Control_Manganese	Experimental_No_Manganese	28859	Uncharacterized protein OS=Drosophila melanogaster OX=7227 GN=SP151 PE=1 SV=1	1115	1034.45	1055.94	1068.47	3.02876	0.0390355	3	920	516.067	523.825	507.68	515.858	2.71253	0.0156533	3	1229	0.482802	-1.0505	2.29827e-05
Q9V3P3	5	3	24.7518	0.0635944	1.19658	0.0364496	1.28352	0.490497	Control_Manganese	Experimental_No_Manganese	28292.8	LD45860p OS=Drosophila melanogaster OX=7227 GN=REG PE=1 SV=1	924.542	1144.38	1132	1066.98	3.02815	0.115754	3	921	723.009	860.841	910.026	831.292	2.91975	0.116622	3	1045	0.77911	-0.360101	0.0600536
Q9VHU7	5	2	23.6234	0.114633	0.940689	0.0559419	1.16386	0.339005	Control_Manganese	Experimental_No_Manganese	56445.6	Uncharacterized protein OS=Drosophila melanogaster OX=7227 GN=CG7553 PE=4 SV=3	1084.19	946.726	1165.94	1065.62	3.0276	0.103959	3	922	839.635	962.583	944.545	915.588	2.9617	0.0725131	3	1005	0.859208	-0.218921	0.114529
Q7KVJ6;Q9W1W0	5	1	24.8758	0.004662	2.33143	0.00624091	1.25097	0.984947	Control_Manganese	Experimental_No_Manganese	78977.9	RE60616p OS=Drosophila melanogaster OX=7227 GN=Fatp2 PE=2 SV=1	994.842	1062.06	1121.03	1059.31	3.02502	0.0596049	3	924	817.894	851.771	870.709	846.791	2.92778	0.0315982	3	1038	0.799379	-0.323048	0.00581616
Q9VGZ0	5	3	24.8533	6.71988e-05	4.17264	0.000490084	1.54255	1	Experimental_No_Manganese	Control_Manganese	59969.6	Probable cytochrome P450 12e1_ mitochondrial OS=Drosophila melanogaster OX=7227 GN=Cyp12e1 PE=2 SV=4	1071.62	1015.62	1086.88	1058.04	3.0245	0.0354634	3	925	1585.35	1651.59	1659.31	1632.08	3.21274	0.024911	3	741	1.54255	0.62532	5.63517e-05
Q9VK47	17	2	143.15	0.00216898	2.66374	0.00380198	1.18969	0.998796	Control_Manganese	Experimental_No_Manganese	82935.5	AT09773p OS=Drosophila melanogaster OX=7227 GN=Vha68-3 PE=2 SV=1	1082.91	1046.74	1039.67	1056.44	3.02385	0.0219582	3	926	924.68	878.75	860.566	887.999	2.94841	0.0372101	3	1019	0.840557	-0.250582	0.0019451
Q9VWG3;M9NEQ9	6	2	43.9766	0.503013	0.29842	0.166576	1.04624	0.0888089	Control_Manganese	Experimental_No_Manganese	17878.4	40S ribosomal protein S10b OS=Drosophila melanogaster OX=7227 GN=RpS10b PE=1 SV=2	1120.12	1100.33	947.143	1055.86	3.02361	0.0896653	3	927	968.484	1053.64	1005.48	1009.2	3.00398	0.0423115	3	960	0.955805	-0.0652112	0.479911
Q9W5X0;F0JAF7;O15971;O18338;M9NEE8;O18334;O18339;P25228;Q7KY04;Q9V3C2;Q9VC31;X2J5T3	8	2	34.3656	0.016932	1.77129	0.0148555	1.28375	0.833417	Experimental_No_Manganese	Control_Manganese	23033.1	LD21953p OS=Drosophila melanogaster OX=7227 GN=Rab35 PE=1 SV=1	945.802	1116.81	1093.59	1052.07	3.02204	0.0881668	3	929	1271.87	1337.98	1441.94	1350.6	3.13053	0.0634788	3	823	1.28375	0.36037	0.0149306
Q9VLI2	10	2	59.8125	0.103387	0.985535	0.0515474	1.11876	0.363895	Experimental_No_Manganese	Control_Manganese	114993	Alpha-mannosidase OS=Drosophila melanogaster OX=7227 GN=LManIII PE=1 SV=2	1151.09	1003.48	1001.11	1051.89	3.02197	0.0816785	3	930	1227.53	1115.32	1187.61	1176.82	3.07071	0.0483343	3	888	1.11876	0.161905	0.103659
Q9VKM7;Q9VKM8	6	4	31.2301	0.287927	0.540717	0.111767	1.0845	0.158757	Control_Manganese	Experimental_No_Manganese	76365.6	AT01533p OS=Drosophila melanogaster OX=7227 GN=CG6087 PE=1 SV=2	1135.25	1086.7	924.343	1048.77	3.02068	0.105317	3	931	976.798	974.867	949.493	967.053	2.98545	0.0157567	3	979	0.922087	-0.117025	0.273149
Q9W3C3	7	5	45.7425	0.0180224	1.74419	0.0153817	1.03074	0.820257	Control_Manganese	Experimental_No_Manganese	48628.9	LD10016p OS=Drosophila melanogaster OX=7227 GN=Dmel\CG2004 PE=1 SV=1	1033.06	1057.39	1052.22	1047.56	3.02018	0.0122369	3	932	1013.59	1012.34	1023	1016.31	3.00703	0.00573168	3	958	0.970173	-0.0436864	0.0184027
P06754;Q8IGY1;A0A0B4K661;A0A0B4KG68;Q8IG84;Q95TA3	13	4	53.089	0.00211075	2.67556	0.00374396	1.10964	0.998923	Control_Manganese	Experimental_No_Manganese	39439.3	Tropomyosin-1_ isoforms 9A/A/B OS=Drosophila melanogaster OX=7227 GN=Tm1 PE=1 SV=2	1057.12	1034.23	1043.81	1045.05	3.01914	0.0110001	3	933	955.181	953.267	916.948	941.799	2.97396	0.0228741	3	992	0.901196	-0.150087	0.00184912
A0A0B4LF95;A1Z944;A0A0B4LGA3;A1Z942;A1Z943;E1JH47;Q0E9A1;Q1RL13;Q7JQK6;Q961I1	3	1	12.0445	0.624478	0.204483	0.19312	1.3419	0.0700377	Control_Manganese	Experimental_No_Manganese	81700.1	Glutaminase_ isoform K OS=Drosophila melanogaster OX=7227 GN=GLS PE=1 SV=1	405.134	1215.02	1511.48	1043.88	3.01865	0.548612	3	934	281.955	849.369	1202.4	777.909	2.89093	0.596942	3	1068	0.745209	-0.424282	0.565964
A8JR01	13	1	62.2969	0.487627	0.311912	0.162948	1.04038	0.0919042	Experimental_No_Manganese	Control_Manganese	343866	Uncharacterized protein_ isoform I OS=Drosophila melanogaster OX=7227 GN=CG14365 PE=4 SV=2	1087.62	1033.89	1008.15	1043.22	3.01838	0.0388687	3	935	1146.4	1117.78	991.857	1085.35	3.03557	0.0757533	3	928	1.04038	0.0571125	0.470639
A0A0C4DHG9;P49762;Q86B73;A0A0B4K6R9;A0A0B4K7Z3;A4V3J9;A8JRF7;B7Z0R6;P49762-2;P49762-3;Q0KI03;Q86B72;Q8IML9	3	2	19.4301	0.0120603	1.91864	0.0119652	1.11768	0.895628	Experimental_No_Manganese	Control_Manganese	171844	Darkener of apricot_ isoform Y OS=Drosophila melanogaster OX=7227 GN=Doa PE=1 SV=1	1044.66	1049.23	1031.92	1041.94	3.01784	0.00860942	3	936	1205.9	1178.42	1109.33	1164.55	3.06616	0.0427246	3	894	1.11768	0.160503	0.0136891
O77425	1	1	5.9159	0.848688	0.071252	0.240396	1.01923	0.0529438	Experimental_No_Manganese	Control_Manganese	31968.1	Ribokinase OS=Drosophila melanogaster OX=7227 GN=Dmel\CG13369 PE=2 SV=1	1231.31	1149.02	734.926	1038.42	3.01637	0.25619	3	937	1123.39	1160.73	891.035	1058.39	3.02464	0.138068	3	945	1.01923	0.0274814	0.914762
Q9W5N2;A0A0B4KED0	2	1	5.8461	0.00145457	2.83727	0.0029277	1.5802	0.999803	Control_Manganese	Experimental_No_Manganese	8256.79	60S ribosomal protein L38 OS=Drosophila melanogaster OX=7227 GN=RpL38 PE=1 SV=1	1071.03	959.422	1082.23	1037.56	3.01601	0.0654435	3	938	601.413	697.006	671.379	656.599	2.8173	0.075359	3	1148	0.632829	-0.660111	0.00142011
Q86BR8;Q9VDL2	8	4	39.2486	0.000155262	3.80894	0.000852877	1.41087	1	Experimental_No_Manganese	Control_Manganese	32998.9	Mitochondrial transcription factor A_ isoform B OS=Drosophila melanogaster OX=7227 GN=TFAM PE=1 SV=1	1016.9	1064.34	1020.43	1033.89	3.01447	0.0255622	3	939	1416.13	1445.14	1514.76	1458.68	3.16396	0.0347493	3	790	1.41087	0.496585	0.000210095
Q9VKF0	3	1	13.2837	0.0439307	1.35723	0.0284727	1.15943	0.592872	Control_Manganese	Experimental_No_Manganese	45528.6	Cyclin Y_ isoform A OS=Drosophila melanogaster OX=7227 GN=CycY PE=1 SV=1	1070.23	1082.57	947.859	1033.55	3.01433	0.0720514	3	940	940.939	865.949	867.397	891.429	2.95009	0.0481068	3	1017	0.86249	-0.213421	0.0457169
Q7KTU3	3	3	12.5655	0.000583126	3.23424	0.00182171	1.75331	0.999999	Experimental_No_Manganese	Control_Manganese	76384.2	FI23912p1 OS=Drosophila melanogaster OX=7227 GN=Dmel\CG7369 PE=2 SV=1	1110.47	1027.41	953.323	1030.4	3.01301	0.0762985	3	941	1908.15	1823.67	1688.01	1806.61	3.25686	0.0614718	3	696	1.75331	0.810077	0.00058873
A1Z729;Q7JYX2	9	5	48.6381	0.0169878	1.76986	0.0148555	1.16006	0.832736	Control_Manganese	Experimental_No_Manganese	36923.5	Uncharacterized protein OS=Drosophila melanogaster OX=7227 GN=BcDNA:SD07613 PE=1 SV=1	959.329	1082.37	1048.39	1030.03	3.01285	0.0616903	3	942	900.853	871.522	891.353	887.91	2.94837	0.0168553	3	1020	0.862022	-0.214203	0.0195915
Q9W0Y1;Q2PE12	9	6	29.6343	0.0144034	1.84153	0.0134694	1.0481	0.865104	Experimental_No_Manganese	Control_Manganese	19226.8	Troponin C-akin-1 protein OS=Drosophila melanogaster OX=7227 GN=Tina-1 PE=2 SV=1	1012.79	1028.02	1049.22	1030.01	3.01284	0.0177613	3	943	1088.5	1070.04	1080.12	1079.55	3.03324	0.00856584	3	931	1.0481	0.0677773	0.0138479
Q9VX63	6	2	27.9058	0.559617	0.252109	0.179157	1.05575	0.0789345	Experimental_No_Manganese	Control_Manganese	110497	FI18001p1 OS=Drosophila melanogaster OX=7227 GN=Dmel\CG8915 PE=2 SV=1	1111.5	1033.8	942.329	1029.21	3.0125	0.0822761	3	945	954.745	1198.97	1106.06	1086.59	3.03607	0.113447	3	927	1.05575	0.0782718	0.542684
Q9VZU4	7	4	31.5079	0.011663	1.93319	0.0117499	1.14003	0.900871	Control_Manganese	Experimental_No_Manganese	30199.4	LD25561p OS=Drosophila melanogaster OX=7227 GN=ND-30 PE=1 SV=1	1055.66	991.288	1040.55	1029.17	3.01249	0.0327072	3	946	866.815	902.977	938.479	902.757	2.95557	0.0396919	3	1013	0.877174	-0.189066	0.0112167
Q8SYC4	6	2	29.858	0.611646	0.2135	0.190619	1.08789	0.0716205	Experimental_No_Manganese	Control_Manganese	47993.8	RE68566p OS=Drosophila melanogaster OX=7227 GN=Dmel\CG13893 PE=1 SV=1	1314.18	564.042	1208.35	1028.86	3.01236	0.394618	3	947	1133.82	1061.86	1162.19	1119.29	3.04894	0.0462079	3	914	1.08789	0.121537	0.721417
P02299;C0HL66;C0HL67	5	4	17.5016	0.0544039	1.26437	0.0326167	1.4301	0.533443	Experimental_No_Manganese	Control_Manganese	15445.1	Histone H3 OS=Drosophila melanogaster OX=7227 GN=His3 PE=1 SV=4	862.349	894.22	1324.09	1026.89	3.01152	0.251128	3	948	1393.84	1492.39	1519.43	1468.55	3.16689	0.045009	3	787	1.4301	0.516118	0.0453056
M9PEX2;M9PF36;Q9VSZ1	2	1	9.057	0.0702876	1.15312	0.0389769	1.15406	0.46339	Control_Manganese	Experimental_No_Manganese	57573.7	Uncharacterized protein_ isoform D OS=Drosophila melanogaster OX=7227 GN=Dmel\CG3529 PE=1 SV=1	972.514	1079.94	993.43	1015.3	3.00659	0.0560972	3	950	968.165	845.698	825.416	879.76	2.94436	0.0877851	3	1023	0.866505	-0.206719	0.0707193
M9PJP0;Q9VXK0	5	5	33.1574	0.111805	0.951537	0.0551123	1.11219	0.344949	Control_Manganese	Experimental_No_Manganese	32250.6	Nipsnap_ isoform F OS=Drosophila melanogaster OX=7227 GN=Nipsnap PE=4 SV=2	940.937	998.636	1105.43	1015	3.00647	0.0822247	3	951	875.834	924.347	937.652	912.611	2.96029	0.0356532	3	1008	0.899123	-0.153409	0.118828
Q9W2M4	1	1	6.9895	0.69376	0.158791	0.208284	1.06488	0.0627863	Experimental_No_Manganese	Control_Manganese	31841.5	Uncharacterized protein OS=Drosophila melanogaster OX=7227 GN=FAMeT PE=1 SV=1	1162.03	1162.37	717.801	1014.07	3.00607	0.253015	3	952	1269.25	1047.14	923.187	1079.86	3.03337	0.16237	3	930	1.06488	0.0906877	0.732426
Q7JXC4	7	4	25.6745	0.642167	0.192352	0.197404	1.03661	0.0679854	Experimental_No_Manganese	Control_Manganese	29260.8	CG6459 protein OS=Drosophila melanogaster OX=7227 GN=P32 PE=1 SV=1	1112.08	875.616	1047.9	1011.87	3.00512	0.120848	3	953	1014.58	1011.1	1121.04	1048.91	3.02074	0.0595793	3	948	1.03661	0.0518688	0.664678
P12646;P12646-2;X2JEF0	11	9	51.5647	0.0414397	1.38258	0.0275701	1.12529	0.609074	Experimental_No_Manganese	Control_Manganese	60944.2	Glucose-6-phosphate 1-dehydrogenase OS=Drosophila melanogaster OX=7227 GN=Zw PE=1 SV=2	970.595	1011.32	1052.17	1011.36	3.00491	0.0403282	3	954	1070.95	1195.52	1147.73	1138.07	3.05617	0.0552214	3	905	1.12529	0.170292	0.0428428
Q7KVC9	2	1	9.7666	0.060761	1.21638	0.0349795	1.24327	0.502967	Experimental_No_Manganese	Control_Manganese	47498.3	FI04445p OS=Drosophila melanogaster OX=7227 GN=Dmel\CG12038 PE=2 SV=1	1026.57	870.085	1111.42	1002.69	3.00117	0.122097	3	955	1216.98	1357.8	1165.07	1246.62	3.09573	0.0799952	3	854	1.24327	0.31414	0.0554781
Q9V3Y4	7	4	36.8747	0.120465	0.91914	0.058423	1.16882	0.327346	Experimental_No_Manganese	Control_Manganese	35239.9	LD43650p OS=Drosophila melanogaster OX=7227 GN=Mtch PE=1 SV=1	1056.22	873.062	1071.8	1000.36	3.00016	0.110481	3	956	1253.12	1183.32	1071.3	1169.24	3.06791	0.0784472	3	891	1.16882	0.225052	0.11137
P47948	2	1	6.5963	0.00302075	2.51989	0.00466716	1.29037	0.995897	Control_Manganese	Experimental_No_Manganese	17940	Troponin C_ isoform 2 OS=Drosophila melanogaster OX=7227 GN=TpnC47D PE=2 SV=2	971.454	958.184	1058.98	996.205	2.99835	0.0549751	3	957	809.996	752.414	753.678	772.03	2.88763	0.0425971	3	1069	0.77497	-0.367787	0.00370247
P12613;A4V391	17	8	81.9005	0.412418	0.384662	0.144325	1.02287	0.110245	Experimental_No_Manganese	Control_Manganese	60127.4	T-complex protein 1 subunit alpha OS=Drosophila melanogaster OX=7227 GN=CCT1 PE=2 SV=2	995.857	953.17	1037.04	995.355	2.99798	0.0421311	3	958	1020	1029.37	1004.98	1018.12	3.0078	0.0120864	3	956	1.02287	0.0326205	0.41801
Q9VSD6	13	7	67.0551	0.546082	0.262742	0.175977	1.02347	0.0810974	Experimental_No_Manganese	Control_Manganese	120166	D-Importin 7/RanBP7 OS=Drosophila melanogaster OX=7227 GN=msk PE=1 SV=1	924.935	1018.49	1042.1	995.175	2.9979	0.0622644	3	959	1015.19	1031.81	1008.6	1018.54	3.00798	0.0117445	3	955	1.02347	0.0334747	0.55631
Q86DS1;C4NYP8;E2QD63	4	1	15.9485	0.013931	1.85602	0.0131534	1.16633	0.871186	Control_Manganese	Experimental_No_Manganese	41264.9	Hsc70-interacting protein 2 OS=Drosophila melanogaster OX=7227 GN=HIP-R PE=1 SV=2	1000.27	1004.91	970.935	992.039	2.99653	0.0185716	3	960	793.573	863.825	894.289	850.562	2.92971	0.060726	3	1036	0.857388	-0.22198	0.0110878
Q9VWE0	7	3	31.0403	0.00388005	2.41116	0.00546563	1.32175	0.990975	Experimental_No_Manganese	Control_Manganese	143787	Cytokine receptor OS=Drosophila melanogaster OX=7227 GN=dome PE=1 SV=1	1006.37	976.054	991.633	991.351	2.99623	0.0152904	3	961	1371.43	1365.09	1194.43	1310.31	3.11738	0.0766288	3	835	1.32175	0.402445	0.00554114
O46037;X2JAB9	4	3	15.3806	0.80103	0.0963513	0.230912	1.00462	0.0551591	Control_Manganese	Experimental_No_Manganese	107101	Vinculin OS=Drosophila melanogaster OX=7227 GN=Vinc PE=1 SV=1	986.169	1003.37	982.41	990.651	2.99592	0.0112836	3	963	956.082	989.266	1012.95	986.1	2.99392	0.0289704	3	969	0.995406	-0.00664317	0.809882
M9NFR5;Q95RE4	3	1	15.5419	0.714307	0.146115	0.212171	1.07147	0.0610136	Control_Manganese	Experimental_No_Manganese	36978.5	Ypsilon schachtel_ isoform B OS=Drosophila melanogaster OX=7227 GN=yps PE=1 SV=1	1242.46	922.667	797.349	987.492	2.99453	0.232435	3	965	896.153	895.683	973.034	921.623	2.96455	0.0483099	3	1001	0.933297	-0.0995923	0.651116
Q9VQR2	4	3	24.9101	0.0253627	1.5958	0.0195931	1.18757	0.740217	Experimental_No_Manganese	Control_Manganese	19146.5	CG8844 protein OS=Drosophila melanogaster OX=7227 GN=ND-PDSW PE=1 SV=1	1021.99	917.299	1019.13	986.142	2.99394	0.0604747	3	966	1244.76	1162.84	1105.73	1171.11	3.0686	0.0596753	3	889	1.18757	0.248009	0.025188
Q8IR93;Q9VZ20	5	2	22.3061	0.0807414	1.0929	0.0432499	1.19928	0.426603	Control_Manganese	Experimental_No_Manganese	44432	Dynein light intermediate chain_ isoform B OS=Drosophila melanogaster OX=7227 GN=Dlic PE=1 SV=1	1106.26	908.59	927.094	980.648	2.99151	0.111331	3	967	893.168	787.845	772.07	817.694	2.91259	0.0805145	3	1051	0.83383	-0.262174	0.0912349
Q9VXA0	3	2	13.5103	0.741731	0.129754	0.218429	1.00869	0.0588886	Experimental_No_Manganese	Control_Manganese	47200.1	GATOR complex protein NPRL2 OS=Drosophila melanogaster OX=7227 GN=Nprl2 PE=1 SV=1	1004.24	987.631	947.901	979.923	2.99119	0.0295407	3	968	954.24	1006.4	1004.68	988.443	2.99495	0.0299797	3	968	1.00869	0.0124899	0.739653
O77134	1	1	6.6326	0.865881	0.0625416	0.244028	1.00009	0.0523037	Control_Manganese	Experimental_No_Manganese	9033.51	9 kD basic protein OS=Drosophila melanogaster OX=7227 GN=ATPsynE PE=1 SV=1	1275.92	669.678	988.682	978.094	2.99038	0.310052	3	969	968.049	963.19	1002.77	978.003	2.99034	0.0220727	3	974	0.999908	-0.000133374	0.999614
Q9W3H4	3	2	14.879	0.806124	0.0935982	0.231697	1.00618	0.0548904	Experimental_No_Manganese	Control_Manganese	26740.7	LD36273p OS=Drosophila melanogaster OX=7227 GN=sni PE=1 SV=1	933.076	981.7	1012.33	975.701	2.98932	0.0409605	3	970	996.777	981.522	966.888	981.729	2.99199	0.0152237	3	970	1.00618	0.00888521	0.818742
Q9VCJ2	2	1	10.2299	0.00391273	2.40752	0.00548194	1.24177	0.990751	Control_Manganese	Experimental_No_Manganese	36024.7	Uncharacterized protein OS=Drosophila melanogaster OX=7227 GN=Dmel\CG10300 PE=4 SV=1	1024.22	927.884	971.642	974.581	2.98882	0.049492	3	971	766.847	767.71	819.943	784.833	2.89478	0.0387461	3	1063	0.805303	-0.312396	0.00449587
Q9W2J4	5	3	24.1097	0.0641507	1.1928	0.036661	1.10326	0.488122	Experimental_No_Manganese	Control_Manganese	60214.4	UDP-glucuronosyltransferase OS=Drosophila melanogaster OX=7227 GN=Ugt49B1 PE=1 SV=2	932.696	948.76	1032.23	971.228	2.98732	0.0550168	3	972	1044.28	1121.39	1048.87	1071.51	3.03	0.0403674	3	936	1.10326	0.141769	0.0648931
Q9W2D9	10	4	57.7021	0.23435	0.630134	0.0949285	1.0754	0.192142	Control_Manganese	Experimental_No_Manganese	25836.7	Eukaryotic translation initiation factor 3 subunit K OS=Drosophila melanogaster OX=7227 GN=eIF3k PE=2 SV=1	974.72	1035.63	895.414	968.586	2.98614	0.0725872	3	973	927.913	848.93	925.179	900.674	2.95457	0.0497764	3	1014	0.929885	-0.104876	0.231167
Q9VY01	3	2	19.3289	0.949025	0.0227224	0.261798	1.01209	0.0503288	Experimental_No_Manganese	Control_Manganese	73130.4	Ecdysone oxidase OS=Drosophila melanogaster OX=7227 GN=Eo PE=2 SV=2	940.749	931.9	1032.33	968.326	2.98602	0.0574236	3	974	1121.59	979.214	839.298	980.035	2.99124	0.144025	3	973	1.01209	0.0173409	0.900108
Q9V9T9	5	1	22.7891	0.119669	0.922019	0.0581812	1.13434	0.328893	Control_Manganese	Experimental_No_Manganese	79530	Beta-glucuronidase OS=Drosophila melanogaster OX=7227 GN=betaGlu PE=1 SV=1	894.867	968.134	1032.11	965.038	2.98454	0.0711643	3	975	785.015	929.602	837.621	850.746	2.9298	0.0860206	3	1035	0.881567	-0.181857	0.119825
O18336;Q86BK8	3	1	17.0426	0.00179435	2.74609	0.00335599	1.28353	0.999464	Experimental_No_Manganese	Control_Manganese	24484.4	MIP20481p OS=Drosophila melanogaster OX=7227 GN=Rab14 PE=1 SV=1	1029.39	924.863	938.779	964.343	2.98423	0.0588567	3	976	1242.17	1247.1	1224.03	1237.77	3.09264	0.00981402	3	862	1.28353	0.360121	0.00122826
Q8T3U2;A0A0B4LFD9	4	2	17.316	0.0234826	1.62925	0.0185064	1.11409	0.759317	Control_Manganese	Experimental_No_Manganese	16073.7	40S ribosomal protein S23 OS=Drosophila melanogaster OX=7227 GN=RpS23 PE=1 SV=1	942.387	949.762	995.631	962.593	2.98344	0.0299693	3	977	838.721	907.698	845.636	864.018	2.93652	0.0439633	3	1030	0.897594	-0.155864	0.0231771
A0A0B4KH28;Q9VDI1	9	5	40.7938	0.0414722	1.38224	0.0275701	1.18265	0.608856	Experimental_No_Manganese	Control_Manganese	56437.4	Syndapin_ isoform C OS=Drosophila melanogaster OX=7227 GN=Synd PE=1 SV=1	957.749	864.298	1055.7	959.248	2.98193	0.0997753	3	978	1136.17	1132.63	1134.57	1134.46	3.05479	0.0015626	3	907	1.18265	0.242023	0.0338523
Q23976	2	2	8.7165	0.400634	0.397253	0.141807	1.12753	0.113697	Experimental_No_Manganese	Control_Manganese	73105.6	ATP-dependent DNA helicase 2 subunit 1 OS=Drosophila melanogaster OX=7227 GN=Irbp PE=2 SV=3	1218.11	882.172	768.791	956.358	2.98062	0.24433	3	979	1187.78	1011.1	1036.09	1078.32	3.03275	0.0886642	3	933	1.12753	0.173167	0.44982
Q9W3N1	5	3	19.4621	0.0300099	1.52274	0.0221408	1.13964	0.696794	Experimental_No_Manganese	Control_Manganese	35173.8	RH59310p OS=Drosophila melanogaster OX=7227 GN=spidey PE=1 SV=1	987.076	970.394	904.36	953.943	2.97952	0.045855	3	981	1043.83	1067.9	1149.74	1087.16	3.03629	0.0510647	3	926	1.13964	0.188583	0.0309486
M9NDP1;Q24117;M9NDC7;O96860	2	2	11.0898	0.621207	0.206763	0.192689	1.0318	0.0704334	Experimental_No_Manganese	Control_Manganese	10487.9	Dynein light chain OS=Drosophila melanogaster OX=7227 GN=ctp PE=2 SV=1	849.975	1067.59	916.406	944.658	2.97527	0.118059	3	983	974.078	975.432	974.595	974.702	2.98887	0.000701186	3	976	1.0318	0.0451695	0.665069
Q7JX87;A1Z893	10	1	59.6736	0.152209	0.817559	0.068704	1.10055	0.27521	Control_Manganese	Experimental_No_Manganese	24927.4	Peroxiredoxin 2540-2 OS=Drosophila melanogaster OX=7227 GN=Prx2540-2 PE=1 SV=1	970.484	855.632	1005.44	943.853	2.9749	0.0830377	3	984	849.073	831.782	891.995	857.617	2.93329	0.0361492	3	1034	0.908634	-0.138229	0.151058
Q7K738	3	1	16.5653	0.0256299	1.59125	0.0196454	1.2412	0.737577	Experimental_No_Manganese	Control_Manganese	17964.5	EG:52C10.4 protein OS=Drosophila melanogaster OX=7227 GN=Ubc10 PE=1 SV=1	910.092	950.751	967.298	942.714	2.97438	0.0312261	3	985	1303.68	1068.71	1137.9	1170.1	3.06822	0.103197	3	890	1.2412	0.311739	0.0338964
Q9VMQ9	4	3	22.9291	0.00961687	2.01697	0.0104132	1.31338	0.927838	Control_Manganese	Experimental_No_Manganese	14888.7	Clot protein OS=Drosophila melanogaster OX=7227 GN=cl PE=1 SV=1	863.571	943.954	1017.28	941.602	2.97387	0.0816504	3	987	671.841	754.677	724.274	716.931	2.85548	0.0584483	3	1100	0.761395	-0.393284	0.0112965
Q7K0B6	3	3	14.0727	0.00235549	2.62792	0.00402073	1.42231	0.998331	Experimental_No_Manganese	Control_Manganese	26742.8	Glutathione S transferase T1 OS=Drosophila melanogaster OX=7227 GN=GstT1 PE=1 SV=1	958.691	887.433	976.788	940.97	2.97358	0.050203	3	988	1229.46	1405.76	1379.84	1338.35	3.12657	0.0711256	3	826	1.42231	0.508236	0.00292848
A0A0B4LGI1;P20354;P20354-2	4	2	19.0873	0.429003	0.367539	0.148797	1.0472	0.10568	Control_Manganese	Experimental_No_Manganese	45155.9	G protein alpha s subunit_ isoform E OS=Drosophila melanogaster OX=7227 GN=Galphas PE=1 SV=1	895.974	968.058	955.724	939.919	2.97309	0.0410179	3	989	875.766	983.465	833.421	897.551	2.95306	0.0861875	3	1015	0.954924	-0.0665428	0.44369
Q9VXD7	3	2	13.4426	0.0585353	1.23258	0.0342531	1.24378	0.513224	Control_Manganese	Experimental_No_Manganese	45277.4	GH04692p OS=Drosophila melanogaster OX=7227 GN=CG4524 PE=1 SV=1	849.995	933.107	1001.7	928.267	2.96767	0.0818383	3	991	725.417	846.009	667.559	746.328	2.87293	0.121989	3	1079	0.804002	-0.31473	0.056531
Q9VHE4	2	2	10.9425	0.487727	0.311823	0.162948	1.06566	0.0918835	Control_Manganese	Experimental_No_Manganese	32098.4	LD31229p OS=Drosophila melanogaster OX=7227 GN=Dmel\CG8132 PE=1 SV=1	810.43	912.581	1053.12	925.378	2.96632	0.131677	3	992	865.944	866.528	872.619	868.364	2.9387	0.00425748	3	1026	0.938389	-0.0917427	0.463349
Q9VG33	3	2	18.8156	0.0168507	1.77338	0.0148555	1.09249	0.83441	Experimental_No_Manganese	Control_Manganese	12117.6	Sulfurtransferase OS=Drosophila melanogaster OX=7227 GN=Dmel\CG12279 PE=1 SV=2	903.826	942.056	924.957	923.613	2.96549	0.020734	3	993	975.052	1040.75	1011.3	1009.04	3.00391	0.0326144	3	961	1.09249	0.127618	0.0177519
Q23983	2	1	9.3021	0.674564	0.170977	0.203773	1.01899	0.0645908	Control_Manganese	Experimental_No_Manganese	33513.5	Alpha-soluble NSF attachment protein OS=Drosophila melanogaster OX=7227 GN=alphaSnap PE=1 SV=1	949.104	871.486	941.258	920.616	2.96408	0.0464126	3	994	947.213	914.545	848.627	903.461	2.95591	0.0555853	3	1012	0.981366	-0.0271365	0.675608
Q01989;A0A0B4KGX1;A0A0B4LHV4;H1UUJ8;Q01989-2;Q01989-3	5	3	20.6386	0.103582	0.984714	0.0515779	1.09775	0.363432	Control_Manganese	Experimental_No_Manganese	144439	Myosin heavy chain 95F OS=Drosophila melanogaster OX=7227 GN=jar PE=2 SV=4	950.968	929.389	880.667	920.342	2.96395	0.0391306	3	995	799.226	903.947	811.985	838.386	2.92344	0.0681484	3	1041	0.910951	-0.134554	0.103443
M9NEX3;Q8IRR0;Q8SY77	3	1	18.8639	0.0240297	1.61925	0.0188237	1.35643	0.753663	Control_Manganese	Experimental_No_Manganese	11750.2	Uncharacterized protein_ isoform D OS=Drosophila melanogaster OX=7227 GN=Dmel\CG3566 PE=1 SV=1	990.349	976.444	792.392	919.728	2.96366	0.120139	3	996	648.935	741.144	644.067	678.049	2.83126	0.0806668	3	1127	0.737227	-0.439819	0.0273983
Q9V4E0	11	4	41.496	0.601014	0.221116	0.188581	1.02101	0.072995	Experimental_No_Manganese	Control_Manganese	53263.4	LD47962p OS=Drosophila melanogaster OX=7227 GN=ND-49 PE=1 SV=2	866.237	941.414	949.838	919.163	2.96339	0.0500767	3	997	971.822	945.074	898.527	938.474	2.97242	0.0395219	3	993	1.02101	0.0299964	0.60174
A1ZAX1;A0A0B4LFL2	6	2	31.7069	0.169378	0.771142	0.0743919	1.05924	0.253013	Control_Manganese	Experimental_No_Manganese	106225	Eukaryotic translation initiation factor 3 subunit C OS=Drosophila melanogaster OX=7227 GN=eIF3c PE=1 SV=1	894.947	978.188	880.511	917.882	2.96279	0.0574397	3	998	851.955	873.804	873.885	866.548	2.93779	0.0145841	3	1027	0.944074	-0.0830289	0.176356
Q9V771	6	4	29.6271	0.00124003	2.90657	0.00264716	1.31461	0.999915	Experimental_No_Manganese	Control_Manganese	58374.5	Probable cytochrome P450 6a23 OS=Drosophila melanogaster OX=7227 GN=Cyp6a23 PE=2 SV=2	939.979	873.34	930.363	914.561	2.96121	0.0393854	3	999	1219.05	1145.51	1242.31	1202.29	3.08001	0.042027	3	876	1.31461	0.394637	0.0013044
Q9VD14	9	6	39.4168	0.0916551	1.03784	0.0470793	1.06261	0.393933	Control_Manganese	Experimental_No_Manganese	62160.3	GH07286p OS=Drosophila melanogaster OX=7227 GN=Dmel\CG13850 PE=1 SV=3	926.922	915.106	897.48	913.169	2.96055	0.0162251	3	1000	896.212	819	862.879	859.364	2.93418	0.0450636	3	1032	0.941078	-0.0876139	0.0878764
X2JC49;A8JNM5;A8JNM6;A8JNM7;M9MRR4;M9MRS5;M9MRX1;M9MS19;M9MSK6;M9PEN3;Q7KU92;A8JNM4;Q7KU95;X2JGD3;M9PHP8;Q9NCP8	22	4	86.2477	0.0158622	1.79964	0.014408	1.19646	0.846633	Control_Manganese	Experimental_No_Manganese	466679	Ankyrin 2_ isoform Z OS=Drosophila melanogaster OX=7227 GN=Ank2 PE=1 SV=1	856.827	910.991	967.362	911.727	2.95986	0.0606222	3	1001	774.683	789.771	721.609	762.021	2.88197	0.0469827	3	1070	0.8358	-0.25877	0.0169954
Q9VLZ3;Q8IPH8	4	1	16.236	0.00432587	2.36393	0.00588467	1.55356	0.987702	Experimental_No_Manganese	Control_Manganese	245422	Myosin 28B1_ isoform A OS=Drosophila melanogaster OX=7227 GN=Myo28B1 PE=3 SV=2	1007.62	795.457	906.312	903.129	2.95575	0.117498	3	1002	1330.31	1492.75	1386.13	1403.06	3.14708	0.0588232	3	806	1.55356	0.635576	0.00298904
Q9VL86	3	3	14.6036	0.0062018	2.20748	0.00764745	1.37507	0.969787	Control_Manganese	Experimental_No_Manganese	47888.9	Zinc carboxypeptidase A 1 OS=Drosophila melanogaster OX=7227 GN=CG17633 PE=2 SV=1	955.931	812.567	935.477	901.325	2.95488	0.0860334	3	1003	622.67	694.738	649.024	655.477	2.81656	0.0556311	3	1151	0.727238	-0.459501	0.00765522
Q9VIB5	7	3	34.2335	0.121207	0.916471	0.0587102	1.18583	0.325917	Experimental_No_Manganese	Control_Manganese	65892.2	Carboxylic ester hydrolase OS=Drosophila melanogaster OX=7227 GN=alpha-Est7 PE=1 SV=1	1016.14	924.948	760.129	900.407	2.95444	0.144112	3	1004	1008.63	1105.39	1089.18	1067.73	3.02846	0.0485346	3	939	1.18583	0.245898	0.106726
Q8SZX1	1	1	3.9153	0.748161	0.126005	0.219465	1.02135	0.0584285	Experimental_No_Manganese	Control_Manganese	51316.9	CG7387 protein OS=Drosophila melanogaster OX=7227 GN=Dmel\CG7387 PE=2 SV=1	908.451	824.476	966.044	899.657	2.95408	0.0791331	3	1005	864.505	994.821	897.271	918.866	2.96325	0.0737748	3	1002	1.02135	0.0304789	0.752048
A0A126GUQ4;Q0KIA8;Q9VI16	12	6	53.6787	0.00188184	2.72542	0.00346283	1.48512	0.999338	Control_Manganese	Experimental_No_Manganese	72358.6	Carnitine O-Acetyl-Transferase_ isoform E OS=Drosophila melanogaster OX=7227 GN=CRAT PE=1 SV=1	945.677	941.127	811.805	899.536	2.95402	0.084501	3	1006	630.174	591.83	595.097	605.701	2.78226	0.0350961	3	1181	0.673348	-0.570576	0.0029772
Q9VQ29	5	3	31.0475	0.33893	0.46989	0.125698	1.04329	0.135201	Control_Manganese	Experimental_No_Manganese	25100.5	Cytochrome b-c1 complex subunit Rieske_ mitochondrial OS=Drosophila melanogaster OX=7227 GN=RFeSP PE=1 SV=3	954.811	871.669	863.988	896.823	2.95271	0.0561603	3	1007	890.779	826.772	861.27	859.607	2.9343	0.0372678	3	1031	0.958503	-0.0611456	0.340957
Q9VHS8	6	2	26.9268	0.0109681	1.95987	0.0112825	1.22964	0.910053	Control_Manganese	Experimental_No_Manganese	45929.9	Eukaryotic initiation factor 4A-III OS=Drosophila melanogaster OX=7227 GN=CG7483 PE=1 SV=1	861.348	877.595	937.77	892.237	2.95048	0.0451227	3	1008	679.607	720.99	776.221	725.606	2.8607	0.0668019	3	1094	0.813243	-0.298241	0.0101807
Q9VGV9	2	1	10.3049	0.521239	0.282963	0.171018	1.0345	0.0853829	Experimental_No_Manganese	Control_Manganese	26297	GH11067p OS=Drosophila melanogaster OX=7227 GN=Dmel\CG6567 PE=1 SV=1	864.197	835.111	953.586	884.298	2.9466	0.0698206	3	1010	960.371	867.926	916.123	914.807	2.96133	0.0505428	3	1007	1.0345	0.0489347	0.53094
P12370	3	1	13.1096	0.477473	0.321051	0.161036	1.08919	0.0940559	Experimental_No_Manganese	Control_Manganese	41010	cAMP-dependent protein kinase catalytic subunit 1 OS=Drosophila melanogaster OX=7227 GN=Pka-C1 PE=1 SV=3	898.813	905.407	840.835	881.685	2.94531	0.0402988	3	1012	1107.03	976.353	797.586	960.322	2.98242	0.161761	3	985	1.08919	0.123255	0.440875
Q9VZX9	6	4	30.0418	0.231451	0.635542	0.0939486	1.05379	0.194292	Experimental_No_Manganese	Control_Manganese	57719.5	Adenosylhomocysteinase-like 1 OS=Drosophila melanogaster OX=7227 GN=AhcyL1 PE=1 SV=1	897.943	870.094	866.58	878.206	2.9436	0.0195659	3	1014	887.048	990.152	899.129	925.443	2.96635	0.0609056	3	999	1.05379	0.0755855	0.237308
M9NE59	15	2	73.9688	0.139147	0.856526	0.0642169	1.24793	0.294645	Control_Manganese	Experimental_No_Manganese	275051	Uncharacterized protein_ isoform G OS=Drosophila melanogaster OX=7227 GN=CG32355 PE=1 SV=1	882.002	809.479	933.852	875.111	2.94206	0.0713877	3	1016	550.518	826.267	726.957	701.247	2.84587	0.199161	3	1112	0.801324	-0.319543	0.120406
P45889	1	1	4.4353	0.135749	0.867262	0.0633217	1.18904	0.300125	Control_Manganese	Experimental_No_Manganese	42890.3	Actin-related protein 1 OS=Drosophila melanogaster OX=7227 GN=Arp1 PE=2 SV=2	743.614	902.836	978.114	874.855	2.94194	0.136855	3	1017	687.223	733.609	786.464	735.765	2.86674	0.067489	3	1086	0.841014	-0.249798	0.136616
Q9VMI3	7	5	33.9546	0.0369046	1.43292	0.0254872	1.06605	0.641037	Experimental_No_Manganese	Control_Manganese	52572.2	NADH dehydrogenase [ubiquinone] flavoprotein 1_ mitochondrial OS=Drosophila melanogaster OX=7227 GN=ND-51 PE=1 SV=1	864.424	865.969	873.631	868.008	2.93852	0.00568051	3	1019	901.411	962.897	911.709	925.339	2.9663	0.0355881	3	1000	1.06605	0.092274	0.0406518
Q9VAX8	6	2	34.3491	0.315546	0.500937	0.120219	1.05382	0.145213	Control_Manganese	Experimental_No_Manganese	111677	LD28793p OS=Drosophila melanogaster OX=7227 GN=Snu114 PE=1 SV=1	885.896	800.713	912.964	866.524	2.93778	0.0676026	3	1020	790.053	847.102	829.661	822.272	2.91502	0.0355525	3	1049	0.948931	-0.0756244	0.306689
A1ZBW6	8	5	34.4399	0.0676691	1.16961	0.0379503	1.13648	0.473626	Control_Manganese	Experimental_No_Manganese	82858.3	Uncharacterized protein_ isoform A OS=Drosophila melanogaster OX=7227 GN=Dmel\CG11180 PE=1 SV=1	866.129	874.68	841.845	860.885	2.93495	0.0197871	3	1022	790.286	682.265	799.959	757.503	2.87938	0.0862539	3	1072	0.879913	-0.184568	0.056868
M9NF47;M9NFP8;M9PHT9;M9PBX1;M9PET1;E1JI71;Q9VSM0;Q9VSM1;Q9VSM2	22	3	100.502	0.543809	0.264553	0.175534	1.07587	0.0814721	Control_Manganese	Experimental_No_Manganese	283056	Uncharacterized protein_ isoform J OS=Drosophila melanogaster OX=7227 GN=CG32352 PE=1 SV=1	726.785	894.103	958.676	859.855	2.93443	0.139185	3	1023	723.973	766.769	906.911	799.218	2.90267	0.119727	3	1056	0.92948	-0.105504	0.530738
A1Z803	3	1	12.6283	0.403611	0.394037	0.142391	1.45032	0.112808	Experimental_No_Manganese	Control_Manganese	38505.2	FI02892p OS=Drosophila melanogaster OX=7227 GN=Marc PE=1 SV=1	39.7418	974.854	1552.98	855.86	2.9324	0.89221	3	1024	741.06	1307.25	1675.5	1241.27	3.09387	0.37921	3	858	1.45032	0.536371	0.498107
Q9VZZ5	3	3	19.5493	0.0129689	1.8871	0.0125172	1.98343	0.883695	Experimental_No_Manganese	Control_Manganese	15935.5	GEO12033p1 OS=Drosophila melanogaster OX=7227 GN=Dmel\CG16986 PE=1 SV=1	607.976	909.708	1049	855.561	2.93225	0.263503	3	1026	1698.11	1786.45	1606.27	1696.94	3.22967	0.0530936	3	727	1.98343	0.987997	0.00387626
C6SV36;Q8SZ28	4	4	18.5276	0.00867219	2.06187	0.00971318	1.5839	0.940065	Experimental_No_Manganese	Control_Manganese	32319.2	IP19903p OS=Drosophila melanogaster OX=7227 GN=CG3884-RB PE=1 SV=1	778.537	759.035	1026.73	854.768	2.93185	0.174602	3	1027	1331.52	1393.74	1336.34	1353.87	3.13158	0.0255677	3	819	1.5839	0.663484	0.0048571
Q24368	8	3	33.7294	0.75044	0.124684	0.219897	1.02102	0.0582688	Control_Manganese	Experimental_No_Manganese	119501	Chromatin-remodeling complex ATPase chain Iswi OS=Drosophila melanogaster OX=7227 GN=Iswi PE=1 SV=1	796.898	830.454	932.894	853.416	2.93116	0.0830149	3	1028	863.088	781.492	862.964	835.848	2.92213	0.0563186	3	1044	0.979415	-0.0300085	0.738621
A2VEG3;M9PDK6;M9PDX3;Q9VID5;M9PDD2;Q8SZ43	8	4	41.2404	0.0005384	3.2689	0.00175487	1.15343	1	Experimental_No_Manganese	Control_Manganese	93485.2	IP16294p OS=Drosophila melanogaster OX=7227 GN=Dmel\CG8671 PE=2 SV=1	847.981	861.114	841.772	850.289	2.92957	0.0116145	3	1029	988.704	956.951	996.581	980.745	2.99156	0.0213913	3	971	1.15343	0.205925	0.000621128
X2JKP3;Q9VXG0	2	1	10.5851	0.138675	0.858002	0.0640746	1.13759	0.295395	Control_Manganese	Experimental_No_Manganese	38962.4	Uncharacterized protein_ isoform B OS=Drosophila melanogaster OX=7227 GN=CDC50 PE=3 SV=1	907.873	772.581	864.477	848.31	2.92855	0.0814322	3	1031	686.85	731.826	818.448	745.708	2.87257	0.0896978	3	1083	0.879051	-0.185982	0.138283
Q9W235	6	3	25.5373	0.259944	0.585121	0.103473	1.05819	0.174828	Experimental_No_Manganese	Control_Manganese	136241	FI01301p OS=Drosophila melanogaster OX=7227 GN=Dmel\CG4329 PE=2 SV=1	850.493	872.849	815.434	846.259	2.9275	0.0341988	3	1032	963.159	868.703	854.645	895.502	2.95207	0.0658983	3	1016	1.05819	0.0815984	0.264173
Q9W022	4	3	20.7379	0.465616	0.331973	0.157854	1.02878	0.0966851	Experimental_No_Manganese	Control_Manganese	15971.5	GEO01508p1 OS=Drosophila melanogaster OX=7227 GN=8993 PE=1 SV=1	846.285	847.398	842.953	845.546	2.92714	0.00273555	3	1033	855.626	926.882	827.127	869.878	2.93946	0.0590683	3	1025	1.02878	0.040931	0.458569
D8FT05;E1JJB2;M9MSM6;Q01295;Q01295-2;Q01295-3;Q01295-4;Q01295-5;Q24206;Q8IRX4;Q9W572	2	2	9.4083	0.178524	0.748302	0.0773659	1.16002	0.242478	Experimental_No_Manganese	Control_Manganese	71161.6	Broad_ isoform O OS=Drosophila melanogaster OX=7227 GN=br PE=2 SV=1	741.051	829.77	952.284	841.035	2.92481	0.126114	3	1034	868.498	1044.47	1013.89	975.62	2.98928	0.0963711	3	975	1.16002	0.214153	0.175393
P26802	3	1	10.7859	0.933763	0.0297633	0.258862	1.00312	0.0505559	Experimental_No_Manganese	Control_Manganese	78160.7	Probable ATP-dependent RNA helicase Dbp73D OS=Drosophila melanogaster OX=7227 GN=Dbp73D PE=2 SV=3	803.784	741.549	955.923	833.752	2.92104	0.132275	3	1036	841.18	887.586	780.282	836.349	2.92239	0.0643452	3	1042	1.00312	0.00448742	0.972512
P32234	8	5	45.6104	0.238541	0.622437	0.0963265	1.10331	0.189109	Control_Manganese	Experimental_No_Manganese	41473.9	GTP-binding protein 128up OS=Drosophila melanogaster OX=7227 GN=128up PE=2 SV=2	927.273	814.587	753.811	831.89	2.92007	0.105802	3	1038	789.536	766.941	705.512	753.996	2.87737	0.0576685	3	1074	0.906365	-0.141836	0.241319
A1ZAJ2	8	3	32.496	0.00275188	2.56037	0.00446346	1.14386	0.997029	Control_Manganese	Experimental_No_Manganese	190600	Kinesin-like protein unc-104 OS=Drosophila melanogaster OX=7227 GN=unc-104 PE=1 SV=1	819.042	861.828	814.399	831.756	2.92	0.0314344	3	1039	739.947	716.034	725.462	727.147	2.86162	0.0165651	3	1093	0.874231	-0.193913	0.00325576
Q9VXK6	1	1	4.5255	0.0495675	1.3048	0.0305609	1.31513	0.559291	Control_Manganese	Experimental_No_Manganese	51985.2	Eukaryotic translation initiation factor 5 OS=Drosophila melanogaster OX=7227 GN=eIF5 PE=1 SV=1	945.131	835.298	694.944	825.124	2.91652	0.151981	3	1040	627.55	665.392	589.282	627.408	2.79755	0.0606545	3	1168	0.76038	-0.395208	0.0592235
Q9VRU1	3	2	6.3158	0.0909387	1.04125	0.046877	1.12906	0.395925	Experimental_No_Manganese	Control_Manganese	39912.3	Aldose 1-epimerase OS=Drosophila melanogaster OX=7227 GN=Dmel\CG10467 PE=1 SV=1	907.946	748.727	813.424	823.366	2.91559	0.0972521	3	1041	929.191	939.361	920.335	929.629	2.96831	0.0102413	3	995	1.12906	0.175123	0.0845554
P40304	3	2	16.2424	0.320737	0.493851	0.12158	1.05439	0.142885	Experimental_No_Manganese	Control_Manganese	25956.3	Proteasome subunit beta type-1 OS=Drosophila melanogaster OX=7227 GN=Prosbeta6 PE=2 SV=2	843.999	809.221	810.008	821.076	2.91438	0.0241829	3	1042	817.542	940.674	838.985	865.734	2.93738	0.0759819	3	1028	1.05439	0.0764075	0.323259
A4V2B8;P08181	5	3	24.2077	0.0656979	1.18245	0.0371648	1.10755	0.481639	Control_Manganese	Experimental_No_Manganese	40130.9	Casein kinase IIalpha_ isoform C OS=Drosophila melanogaster OX=7227 GN=CkIIalpha PE=1 SV=1	841.287	784.098	827.405	817.596	2.91254	0.0364845	3	1043	689.706	776.284	748.61	738.2	2.86817	0.0598995	3	1085	0.90289	-0.147378	0.0614424
Q8INP8;Q8INP9;Q9VHI8	7	5	39.52	0.211709	0.674262	0.0879442	1.13367	0.210115	Control_Manganese	Experimental_No_Manganese	41277.1	Uncharacterized protein_ isoform B OS=Drosophila melanogaster OX=7227 GN=anon-WO0118547.327 PE=1 SV=1	930.065	780.309	711.593	807.323	2.90705	0.138375	3	1049	725.956	687.272	723.166	712.131	2.85256	0.0302952	3	1104	0.88209	-0.181002	0.220894
Q9XYM0;H9XVM6;Q95RW2;H9XVM7;X2JD84	6	4	31.1371	0.0050006	2.30098	0.00649402	1.24752	0.981946	Experimental_No_Manganese	Control_Manganese	31433.1	Adapter molecule Crk OS=Drosophila melanogaster OX=7227 GN=Crk PE=1 SV=1	865.636	777.95	777.86	807.149	2.90695	0.0627535	3	1050	1016.53	1031.29	972.986	1006.93	3.003	0.0301043	3	965	1.24752	0.319064	0.00422702
Q9VTZ6	5	3	28.1749	0.767136	0.115128	0.224132	1.0246	0.0571517	Experimental_No_Manganese	Control_Manganese	29838.1	Probable phosphomannomutase OS=Drosophila melanogaster OX=7227 GN=CG10688 PE=2 SV=1	825.81	776.395	814.257	805.487	2.90606	0.0320903	3	1051	931.417	770.259	774.237	825.304	2.91661	0.111375	3	1047	1.0246	0.0350641	0.737414
A0A0B4KGM4;A0A0B4KH30;A8JR00;A8JR02;A8JR03	14	1	62.9055	9.57597e-05	4.01882	0.000584872	1.30022	1	Experimental_No_Manganese	Control_Manganese	227360	Uncharacterized protein_ isoform L OS=Drosophila melanogaster OX=7227 GN=CG14365 PE=4 SV=1	788.517	803.189	822.802	804.836	2.90571	0.0213725	3	1052	1025.34	1066.1	1047.95	1046.46	3.01972	0.0195159	3	949	1.30022	0.378754	9.67787e-05
Q9W2N0	4	4	20.5401	0.00780527	2.10761	0.00902671	1.34722	0.950978	Experimental_No_Manganese	Control_Manganese	32873.6	F-actin-capping protein subunit alpha OS=Drosophila melanogaster OX=7227 GN=cpa PE=2 SV=1	726.729	796.074	884.696	802.5	2.90444	0.0986658	3	1053	1035.77	1094.19	1113.48	1081.15	3.03388	0.0374311	3	929	1.34722	0.42999	0.00558873
Q7KK90	7	5	24.601	0.0125896	1.89999	0.0122723	1.17736	0.888665	Control_Manganese	Experimental_No_Manganese	25016.5	GH14654p OS=Drosophila melanogaster OX=7227 GN=GstE1 PE=1 SV=1	743.927	812.54	839.154	798.54	2.9023	0.0615283	3	1054	663.47	687.045	684.232	678.249	2.83139	0.0189839	3	1126	0.849361	-0.23555	0.0148282
A1ZBE9	3	3	12.6394	0.166254	0.779227	0.0735987	1.1908	0.256804	Control_Manganese	Experimental_No_Manganese	113340	Methionyl-tRNA synthetase OS=Drosophila melanogaster OX=7227 GN=MetRS PE=1 SV=1	722.232	829.594	830.881	794.236	2.89995	0.0785166	3	1055	555.934	667.257	777.741	666.977	2.82411	0.166278	3	1139	0.839773	-0.251929	0.158242
Q9V436	6	4	29.3232	0.154061	0.812308	0.0692996	1.09521	0.272647	Experimental_No_Manganese	Control_Manganese	30396.1	26S proteasome regulatory complex subunit p30 OS=Drosophila melanogaster OX=7227 GN=Rpn12 PE=1 SV=1	741.302	767.503	860.268	789.691	2.89746	0.0791568	3	1056	825.028	906.585	863.02	864.878	2.93695	0.0471858	3	1029	1.09521	0.131208	0.156021
Q9V774	9	3	48.4812	0.329785	0.48177	0.123592	1.04992	0.138974	Experimental_No_Manganese	Control_Manganese	58355.3	Probable cytochrome P450 6a21 OS=Drosophila melanogaster OX=7227 GN=Cyp6a21 PE=2 SV=1	820.959	731.966	799.223	784.05	2.89434	0.0591753	3	1057	797.092	803.34	869.128	823.186	2.9155	0.0484808	3	1048	1.04992	0.0702744	0.330133
A0A0B4LHX1;O76206	3	2	13.8476	0.676603	0.169666	0.204231	1.02691	0.0643921	Experimental_No_Manganese	Control_Manganese	17156.6	GEO08148p1 OS=Drosophila melanogaster OX=7227 GN=C PE=2 SV=1	797.045	864.193	684.477	781.905	2.89315	0.116138	3	1058	819.548	791.808	797.478	802.945	2.90469	0.0182521	3	1054	1.02691	0.0383075	0.712199
Q7K2E1	4	3	22.2785	0.38153	0.418471	0.136841	1.07208	0.1197	Experimental_No_Manganese	Control_Manganese	58663.1	LD05247p OS=Drosophila melanogaster OX=7227 GN=Dmel\CG8839 PE=1 SV=1	853.027	715.661	771.381	780.023	2.89211	0.0885739	3	1059	915.33	820.46	772.954	836.248	2.92234	0.0866834	3	1043	1.07208	0.100414	0.385879
Q9V3A8	6	1	29.3104	0.379167	0.421169	0.136603	1.08	0.12048	Control_Manganese	Experimental_No_Manganese	57853.5	Ergic53_ isoform A OS=Drosophila melanogaster OX=7227 GN=ergic53 PE=1 SV=1	721.628	859.888	757.746	779.754	2.89196	0.0919642	3	1060	656.18	707.149	802.648	721.992	2.85853	0.102984	3	1096	0.925923	-0.111036	0.387632
Q8I0S9;Q9V9T5	4	2	16.9866	0.739451	0.131091	0.218148	1.01729	0.0590552	Control_Manganese	Experimental_No_Manganese	69581.8	RE65842p OS=Drosophila melanogaster OX=7227 GN=Mccc1 PE=1 SV=1	812.676	715.914	794.331	774.307	2.88891	0.0663751	3	1062	793.949	733.124	756.359	761.144	2.88147	0.0403257	3	1071	0.983	-0.0247365	0.722671
Q9VUY9	13	2	54.0886	0.0140345	1.8528	0.0132192	1.17412	0.86985	Control_Manganese	Experimental_No_Manganese	61108.4	Phosphoglucomutase OS=Drosophila melanogaster OX=7227 GN=Pgm PE=1 SV=1	757.985	778.408	778.68	771.691	2.88744	0.0153824	3	1063	612.709	661.075	697.961	657.248	2.81773	0.0650516	3	1146	0.851699	-0.231585	0.0110984
Q8I940;Q9VZV9	2	1	8.6435	0.772527	0.112086	0.225187	1.01849	0.0568104	Control_Manganese	Experimental_No_Manganese	60577.6	Uncharacterized protein_ isoform D OS=Drosophila melanogaster OX=7227 GN=Dmel\CG1271 PE=3 SV=1	803.491	718.809	780.544	767.615	2.88514	0.0570556	3	1065	673.135	773.306	814.604	753.682	2.87719	0.0965231	3	1075	0.981849	-0.0264269	0.790361
P49963	1	1	4.5075	0.0548999	1.26043	0.0328637	1.20909	0.53093	Experimental_No_Manganese	Control_Manganese	18566	Signal recognition particle 19 kDa protein OS=Drosophila melanogaster OX=7227 GN=Srp19 PE=2 SV=2	767.426	753.063	780.086	766.858	2.88472	0.0176313	3	1066	1014.03	959.341	808.234	927.202	2.96717	0.114966	3	997	1.20909	0.273924	0.0610262
A0A0B4KG94;Q9VGJ6	7	3	36.2646	0.324832	0.488341	0.122091	1.11423	0.141092	Control_Manganese	Experimental_No_Manganese	48051.6	Uncharacterized protein_ isoform B OS=Drosophila melanogaster OX=7227 GN=Dmel\CG6908 PE=1 SV=1	711.144	684.938	896.788	764.29	2.88326	0.151111	3	1067	661.35	733.893	662.571	685.938	2.83628	0.060552	3	1120	0.897484	-0.156041	0.330875
Q08012	3	1	14.5058	0.685124	0.164231	0.20585	1.06071	0.0635799	Experimental_No_Manganese	Control_Manganese	24492.5	Protein enhancer of sevenless 2B OS=Drosophila melanogaster OX=7227 GN=drk PE=1 SV=1	643.592	632.922	996.469	757.661	2.87947	0.273054	3	1071	678.307	826.305	906.361	803.658	2.90507	0.143968	3	1053	1.06071	0.0850292	0.753685
Q86B44;Q8IQZ1;Q1RL06;X2JCE7	5	3	32.6245	0.0303103	1.51841	0.0222065	1.13836	0.69416	Experimental_No_Manganese	Control_Manganese	62236.6	Glutathione synthetase OS=Drosophila melanogaster OX=7227 GN=Gss2 PE=1 SV=2	720.994	796.365	746.98	754.78	2.87782	0.0507249	3	1072	839.342	905.457	832.826	859.208	2.9341	0.04677	3	1033	1.13836	0.186952	0.0311161
Q9VLZ1	1	1	5.6103	0.164389	0.784127	0.0730211	1.56383	0.259117	Control_Manganese	Experimental_No_Manganese	48482.5	Uncharacterized protein OS=Drosophila melanogaster OX=7227 GN=Dmel\CG7025 PE=4 SV=2	734.924	851.305	671.259	752.496	2.8765	0.12133	3	1073	244.716	586.36	612.487	481.188	2.68231	0.426458	3	1248	0.639456	-0.645084	0.104565
Q8IPD2	2	2	13.0099	0.997994	0.000872109	0.271475	1.00084	0.0500005	Control_Manganese	Experimental_No_Manganese	54146.1	AT27305p OS=Drosophila melanogaster OX=7227 GN=Fum4 PE=2 SV=1	699.282	733.829	807.6	746.903	2.87326	0.0740789	3	1075	760.218	774.062	704.543	746.274	2.8729	0.0493081	3	1080	0.999158	-0.00121543	0.987704
Q9VHP0;A0A0B4KGU4	6	3	28.1413	0.188598	0.724463	0.0810265	1.09604	0.231758	Control_Manganese	Experimental_No_Manganese	85423.4	ATP-dependent RNA helicase bel OS=Drosophila melanogaster OX=7227 GN=bel PE=1 SV=1	750.356	678.688	808.843	745.962	2.87272	0.0873889	3	1076	646.854	699.043	695.9	680.599	2.83289	0.0430008	3	1124	0.912377	-0.132298	0.18829
O18335	6	5	30.2087	0.201798	0.695083	0.0850017	1.1264	0.218938	Control_Manganese	Experimental_No_Manganese	24359.4	Drab11 OS=Drosophila melanogaster OX=7227 GN=Rab11 PE=1 SV=1	834.233	728.49	674.352	745.692	2.87256	0.109049	3	1077	639.066	722.308	624.66	662.011	2.82087	0.0796259	3	1144	0.887781	-0.171724	0.209074
Q86BP1;Q960K8	4	3	22.5554	0.539114	0.268319	0.174885	1.04399	0.0822569	Control_Manganese	Experimental_No_Manganese	43217.6	3-hydroxyisobutyryl-CoA hydrolase_ mitochondrial OS=Drosophila melanogaster OX=7227 GN=CT16187 PE=1 SV=1	827.069	678.27	730.511	745.283	2.87232	0.101292	3	1078	729.692	696.279	715.66	713.877	2.85362	0.0235025	3	1102	0.95786	-0.0621133	0.520586
Q9VY05	1	1	4.9757	0.00266637	2.57408	0.00439775	1.43828	0.997347	Control_Manganese	Experimental_No_Manganese	69285.4	GH11762p OS=Drosophila melanogaster OX=7227 GN=Dmel\CG9512 PE=1 SV=1	817.157	726.835	685.55	743.181	2.87109	0.0905682	3	1079	527.605	499.481	523.056	516.714	2.71325	0.0292169	3	1227	0.695273	-0.524348	0.00472256
A0A0B4K851;A0A0B4KFL0;A0A126GUM4;Q4Z8K6;Q4Z8K6-2;Q4Z8K6-3	2	1	9.7036	0.0431327	1.36519	0.0282417	1.20246	0.597965	Control_Manganese	Experimental_No_Manganese	107167	Ran-binding protein M_ isoform E OS=Drosophila melanogaster OX=7227 GN=RanBPM PE=1 SV=1	739.138	681.84	802.024	741.001	2.86982	0.0811244	3	1081	662.738	612.917	573.054	616.236	2.78975	0.0729162	3	1175	0.831627	-0.265991	0.0450422
Q9VQD7	3	3	16.9938	0.168654	0.773003	0.0742408	1.17906	0.253882	Control_Manganese	Experimental_No_Manganese	16880.3	NADH dehydrogenase [ubiquinone] 1 alpha subcomplex subunit 12 OS=Drosophila melanogaster OX=7227 GN=ND-B17.2 PE=1 SV=1	802.525	807.244	612.071	740.613	2.86959	0.150343	3	1082	647.279	603.575	633.563	628.139	2.79806	0.0355834	3	1167	0.848134	-0.237637	0.161421
Q9VHX4	6	3	28.3871	0.000186985	3.72819	0.000908718	1.54729	1	Experimental_No_Manganese	Control_Manganese	37033.2	LD24679p OS=Drosophila melanogaster OX=7227 GN=Dmel\CG2767 PE=1 SV=1	771.783	696.91	748.618	739.104	2.86871	0.0518639	3	1083	1167.58	1147.21	1116.02	1143.61	3.05828	0.0227065	3	904	1.54729	0.629741	0.000111177
Q9VRD6;A8JUT4;D0Z726	2	1	13.3509	0.165012	0.782484	0.0732146	1.27196	0.25834	Control_Manganese	Experimental_No_Manganese	14622.4	GEO05124p1 OS=Drosophila melanogaster OX=7227 GN=Ntf-2 PE=1 SV=1	624.935	924.383	659.687	736.335	2.86708	0.222424	3	1084	560.983	642.415	533.298	578.899	2.7626	0.0979822	3	1197	0.78619	-0.347051	0.19076
Q9VZK8	6	3	34.093	0.557172	0.254011	0.178813	1.06558	0.0793167	Experimental_No_Manganese	Control_Manganese	36799.8	Uncharacterized protein OS=Drosophila melanogaster OX=7227 GN=Dmel\CG12766 PE=4 SV=1	788.86	698.272	717.504	734.878	2.86622	0.0649468	3	1085	879.76	805.322	664.128	783.07	2.8938	0.139866	3	1065	1.06558	0.0916358	0.523254
Q9VC06	8	3	36.6829	0.217444	0.662653	0.0897542	1.19956	0.205292	Control_Manganese	Experimental_No_Manganese	81969	LD37516p OS=Drosophila melanogaster OX=7227 GN=Dmel\CG11771 PE=1 SV=1	818.812	742.015	640.7	733.842	2.8656	0.121738	3	1086	732.401	597.726	505.147	611.758	2.78658	0.186797	3	1177	0.833637	-0.262509	0.218636
Q9VAC5	4	3	17.6506	0.530778	0.275087	0.172754	1.01912	0.0836871	Experimental_No_Manganese	Control_Manganese	85361.8	ADAM 17-like protease OS=Drosophila melanogaster OX=7227 GN=Tace PE=2 SV=2	750.515	716.934	727.909	731.786	2.86438	0.0233988	3	1088	774.111	713.909	749.32	745.78	2.87261	0.0405703	3	1082	1.01912	0.0273286	0.524076
P41374;X2JFR6	6	2	33.2876	0.324153	0.48925	0.121953	1.0545	0.141386	Control_Manganese	Experimental_No_Manganese	38873.9	Eukaryotic translation initiation factor 2 subunit 1 OS=Drosophila melanogaster OX=7227 GN=eIF2alpha PE=2 SV=1	720.962	709.922	750.477	727.12	2.86161	0.0288361	3	1090	650.525	753.791	664.308	689.541	2.83856	0.0813105	3	1117	0.948318	-0.0765578	0.338008
Q9VH72	3	2	21.0332	0.00983104	2.0074	0.0105415	1.22292	0.925035	Control_Manganese	Experimental_No_Manganese	22884.4	TA01656p1 OS=Drosophila melanogaster OX=7227 GN=Dmel\CG9471 PE=1 SV=1	738.804	687.353	750.77	725.642	2.86072	0.0464348	3	1091	577.465	568.504	634.138	593.369	2.77332	0.0599794	3	1186	0.817716	-0.290329	0.0094856
M9PE32;M9PDV6;Q9VZY3	8	2	41.6155	0.825428	0.083321	0.234999	1.01971	0.0539423	Control_Manganese	Experimental_No_Manganese	143943	Fife_ isoform D OS=Drosophila melanogaster OX=7227 GN=Fife PE=1 SV=1	655.559	714.88	803.828	724.756	2.86019	0.102967	3	1092	651.002	692.96	788.274	710.745	2.85171	0.0989712	3	1106	0.980668	-0.0281628	0.824568
M9NEG4;M9PEK6;Q8IR55;Q9VY43	11	3	44.5074	0.380519	0.419624	0.136712	1.05032	0.120033	Control_Manganese	Experimental_No_Manganese	250917	Mushroom body defect_ isoform J OS=Drosophila melanogaster OX=7227 GN=mud PE=1 SV=1	669.499	757.945	730.088	719.178	2.85684	0.0628789	3	1094	730.716	666.865	656.596	684.725	2.83552	0.0586489	3	1122	0.952095	-0.0708226	0.379657
Q9VG60	5	2	22.6959	0.287387	0.541533	0.111668	1.05218	0.159044	Experimental_No_Manganese	Control_Manganese	60447	LD24919p OS=Drosophila melanogaster OX=7227 GN=Dmel\CG12267 PE=2 SV=2	777.16	695.554	676.168	716.294	2.85509	0.0748236	3	1096	762.571	752.038	746.411	753.673	2.87718	0.0108844	3	1076	1.05218	0.0733877	0.298414
Q7KML2	8	3	38.2243	0.873114	0.0589293	0.245152	1.00386	0.0520589	Control_Manganese	Experimental_No_Manganese	75028.7	Probable peroxisomal acyl-coenzyme A oxidase 1 OS=Drosophila melanogaster OX=7227 GN=CG5009 PE=1 SV=1	706.011	714.739	712.926	711.226	2.85201	0.00647572	3	1098	740.145	709.707	675.623	708.492	2.85033	0.0455592	3	1108	0.996156	-0.00555643	0.891551
Q59E08;M9PIL1;Q9VNT0	4	1	18.3697	0.327098	0.485323	0.122707	1.05064	0.140116	Experimental_No_Manganese	Control_Manganese	31280.1	Uncharacterized protein_ isoform B OS=Drosophila melanogaster OX=7227 GN=Dmel\CG14457 PE=4 SV=1	757.977	675.075	696.853	709.968	2.85124	0.0605368	3	1099	787.399	716.822	733.537	745.919	2.87269	0.0494446	3	1081	1.05064	0.0712647	0.333284
Q9VVC1	3	2	4.5048	0.000108301	3.96537	0.000641425	3.33165	1	Experimental_No_Manganese	Control_Manganese	65947.9	LD29172p OS=Drosophila melanogaster OX=7227 GN=Dmel\CG11905 PE=2 SV=3	615.42	716.797	796.785	709.667	2.85105	0.128078	3	1100	2277.22	2331.86	2484	2364.36	3.37371	0.0453202	3	585	3.33165	1.73624	3.41152e-05
Q9V438	5	4	25.2771	0.74077	0.130316	0.218373	1.01921	0.0589586	Experimental_No_Manganese	Control_Manganese	47208.2	Protein disulfide-isomerase A6 homolog OS=Drosophila melanogaster OX=7227 GN=CaBP1 PE=1 SV=1	703.287	732.277	692.157	709.24	2.85079	0.0292033	3	1101	658.492	758.504	751.606	722.867	2.85906	0.0772722	3	1095	1.01921	0.0274562	0.712191
Q9VJI0	2	1	9.0541	0.0702973	1.15306	0.0389769	1.16985	0.463353	Experimental_No_Manganese	Control_Manganese	58652.8	Ugt36Ba_ isoform A OS=Drosophila melanogaster OX=7227 GN=Ugt37C2 PE=1 SV=1	675.759	784.343	644.867	701.656	2.84612	0.104403	3	1102	796.087	866.46	799.949	820.832	2.91425	0.0481974	3	1050	1.16985	0.226322	0.0682603
Q9V3U6	2	1	9.7667	0.525076	0.279777	0.171756	1.06716	0.0846929	Control_Manganese	Experimental_No_Manganese	62700.2	26-29kD-proteinase OS=Drosophila melanogaster OX=7227 GN=26-29-p PE=1 SV=1	697.898	656.436	744.902	699.745	2.84494	0.0632543	3	1103	536.339	744.718	686.068	655.708	2.81671	0.163877	3	1150	0.937067	-0.0937755	0.547455
M9PD18;P48602	21	2	168.964	0.00818574	2.08694	0.00935002	1.14084	0.946235	Experimental_No_Manganese	Control_Manganese	68718.2	Vacuolar H[+] ATPase 68kD subunit 1_ isoform B OS=Drosophila melanogaster OX=7227 GN=Vha68-1 PE=1 SV=1	700.409	675.048	714.389	696.615	2.84299	0.0286283	3	1104	819.122	762.546	802.509	794.726	2.90022	0.0365911	3	1057	1.14084	0.190094	0.00852793
Q9VN55	3	3	18.5493	0.000895659	3.04786	0.00218817	1.25718	0.999988	Control_Manganese	Experimental_No_Manganese	60908.2	Antimeros_ isoform A OS=Drosophila melanogaster OX=7227 GN=atms PE=1 SV=1	690.346	693.32	702.992	695.553	2.84233	0.00950557	3	1105	529.131	553.037	577.62	553.263	2.74293	0.0438225	3	1209	0.795429	-0.330195	0.000606047
Q8IP94;Q9VKB0	2	1	8.9882	0.27565	0.559642	0.10775	1.07115	0.165484	Experimental_No_Manganese	Control_Manganese	80029.9	Threonyl-tRNA synthetase_ isoform B OS=Drosophila melanogaster OX=7227 GN=ThrRS PE=1 SV=1	741.587	657.689	659.483	686.253	2.83648	0.0698416	3	1107	683.135	775.855	746.258	735.083	2.86634	0.0644275	3	1087	1.07115	0.0991656	0.277738
Q9VA92	4	3	18.5081	0.539646	0.267891	0.174912	1.06583	0.0821673	Experimental_No_Manganese	Control_Manganese	48406.9	RH14937p OS=Drosophila melanogaster OX=7227 GN=Dmel\CG9743 PE=2 SV=2	684.426	554.972	814.659	684.685	2.83549	0.18964	3	1109	755.766	704.783	728.717	729.755	2.86318	0.0349534	3	1091	1.06583	0.0919714	0.586948
Q9VLJ7	3	1	10.4725	0.715853	0.145176	0.21247	1.04727	0.0608865	Experimental_No_Manganese	Control_Manganese	59930.9	Fatty acyl-CoA reductase OS=Drosophila melanogaster OX=7227 GN=CT32316 PE=2 SV=2	466.881	804.536	772.942	681.453	2.83344	0.273672	3	1110	752.751	752.035	636.217	713.667	2.8535	0.0939862	3	1103	1.04727	0.0666371	0.792268
Q9VBU0	1	1	4.6835	0.647612	0.188685	0.198391	1.03756	0.0673827	Control_Manganese	Experimental_No_Manganese	48503.4	Uncharacterized protein_ isoform A OS=Drosophila melanogaster OX=7227 GN=CG33091 PE=4 SV=2	713.866	614.565	710.562	679.664	2.83229	0.0829853	3	1111	611.952	735.183	618.045	655.06	2.81628	0.106029	3	1154	0.9638	-0.053195	0.65871
Q7K7G0;Q9W555	6	4	23.6901	0.575314	0.240095	0.182952	1.05353	0.0765671	Control_Manganese	Experimental_No_Manganese	58045.8	Coatomer subunit delta OS=Drosophila melanogaster OX=7227 GN=deltaCOP PE=1 SV=1	633.07	750.27	654.019	679.12	2.83195	0.0920333	3	1112	555.962	670.622	707.261	644.615	2.8093	0.122446	3	1159	0.949192	-0.0752279	0.58472
Q9VIF2	7	4	41.6991	0.317535	0.498209	0.120859	1.06301	0.144313	Experimental_No_Manganese	Control_Manganese	55701.6	GM01519p OS=Drosophila melanogaster OX=7227 GN=Dmel\CG9248 PE=1 SV=1	721.593	693.389	610.348	675.11	2.82937	0.085662	3	1115	746.303	690.209	716.425	717.646	2.85591	0.0391097	3	1098	1.06301	0.0881499	0.315652
Q9W4C2	2	1	9.1194	0.814065	0.089341	0.232982	1.01602	0.054487	Experimental_No_Manganese	Control_Manganese	17784	GEO08277p1 OS=Drosophila melanogaster OX=7227 GN=BcDNA:RH17440 PE=2 SV=2	821.654	542.174	648.328	670.719	2.82654	0.21034	3	1116	691.155	686.169	667.075	681.466	2.83344	0.0186515	3	1123	1.01602	0.022934	0.901792
Q9VEY5	2	1	11.1587	0.790006	0.102369	0.228408	1.00938	0.0557678	Control_Manganese	Experimental_No_Manganese	24709.4	MICOS complex subunit OS=Drosophila melanogaster OX=7227 GN=Dmel\CG5903 PE=1 SV=1	704.644	654.978	651.773	670.465	2.82638	0.0442126	3	1117	656.589	646.414	689.695	664.232	2.82232	0.0340694	3	1143	0.990704	-0.0134734	0.786618
C0HKA2;C0HKA3;C0HKA4;P04814	4	3	13.4111	0.0119107	1.92406	0.0119068	1.34039	0.897601	Control_Manganese	Experimental_No_Manganese	26079.1	Trypsin delta OS=Drosophila melanogaster OX=7227 GN=deltaTry PE=2 SV=1	618.61	659.204	732.789	670.201	2.82621	0.0863602	3	1118	511.838	530.987	457.188	500.004	2.69897	0.0765914	3	1236	0.746051	-0.422654	0.0131831
F3YD98;Q9W486;X2JIH1	4	2	23.6047	0.0168834	1.77254	0.0148555	1.11371	0.83401	Control_Manganese	Experimental_No_Manganese	51579	FI14710p OS=Drosophila melanogaster OX=7227 GN=CG32758-RA PE=1 SV=1	662.565	679.404	667.569	669.846	2.82598	0.0129091	3	1119	629.863	574.795	599.711	601.456	2.7792	0.0458479	3	1183	0.897902	-0.15537	0.014867
A0A0U1RVK6;Q9VIS3;X2JES1	5	4	26.1441	0.000307928	3.51155	0.00121583	1.32324	1	Experimental_No_Manganese	Control_Manganese	37259.6	Fructose-1_6-bisphosphatase_ isoform F OS=Drosophila melanogaster OX=7227 GN=fbp PE=1 SV=1	674.427	690.618	640.93	668.658	2.8252	0.0378983	3	1120	881.081	901.05	872.253	884.794	2.94684	0.0166741	3	1021	1.32324	0.404073	0.0002169
Q9VVP2	3	2	13.9086	0.431286	0.365234	0.149413	1.07566	0.105077	Experimental_No_Manganese	Control_Manganese	77527.2	MIP25823p1 OS=Drosophila melanogaster OX=7227 GN=Dmel\CG7320 PE=2 SV=3	588.644	646.436	763.066	666.049	2.82351	0.133398	3	1122	719.787	660.245	769.303	716.445	2.85518	0.0762177	3	1101	1.07566	0.105227	0.449689
Q9VN50	4	1	19.6902	0.0601505	1.22076	0.03473	1.2719	0.505738	Experimental_No_Manganese	Control_Manganese	31389.9	Eukaryotic translation initiation factor 3 subunit F-1 OS=Drosophila melanogaster OX=7227 GN=eIF3f1 PE=2 SV=1	649.748	575.588	756.831	660.722	2.82002	0.137908	3	1123	813.083	925.251	782.783	840.372	2.92447	0.0893082	3	1039	1.2719	0.346985	0.0578286
A0A0B4KGQ0;Q9VCI7	2	1	9.6547	0.666788	0.176013	0.20232	1.08954	0.0653646	Experimental_No_Manganese	Control_Manganese	47601.5	Ran binding protein 3_ isoform B OS=Drosophila melanogaster OX=7227 GN=RanBP3 PE=1 SV=1	309.408	875.058	796.414	660.293	2.81974	0.46405	3	1124	594.143	655.614	908.483	719.413	2.85698	0.231576	3	1097	1.08954	0.123714	0.783668
Q8MLS2	5	2	24.3393	0.208936	0.679987	0.0870699	1.10008	0.212519	Control_Manganese	Experimental_No_Manganese	26819.7	Ribose-5-phosphate isomerase_ isoform B OS=Drosophila melanogaster OX=7227 GN=Rpi PE=1 SV=3	679.156	667.775	610.849	652.593	2.81464	0.0560795	3	1127	656.161	582.615	540.892	593.223	2.77322	0.0983815	3	1187	0.909024	-0.13761	0.209785
Q9V3P4	6	3	25.9386	0.00950457	2.02207	0.0103779	1.60185	0.929304	Control_Manganese	Experimental_No_Manganese	33328.3	CG7953 protein OS=Drosophila melanogaster OX=7227 GN=Dmel\CG7953 PE=2 SV=1	570.474	612.162	772.35	651.662	2.81402	0.163547	3	1128	431.266	411.249	377.938	406.817	2.6094	0.0662185	3	1289	0.624277	-0.679742	0.0181814
M9NE05	10	4	45.1112	0.793675	0.100358	0.22913	1.06424	0.0555611	Experimental_No_Manganese	Control_Manganese	247730	Neuromusculin_ isoform E OS=Drosophila melanogaster OX=7227 GN=nrm PE=4 SV=1	525.95	621.883	796.795	648.209	2.81172	0.211858	3	1129	497.462	813.115	758.979	689.852	2.83876	0.244688	3	1116	1.06424	0.0898272	0.756936
Q9VZF6	7	2	36.6289	0.405322	0.3922	0.142608	1.13615	0.112302	Experimental_No_Manganese	Control_Manganese	51732.5	GH04863p OS=Drosophila melanogaster OX=7227 GN=BcDNA:GH04863 PE=1 SV=1	629.101	480.514	816.877	642.164	2.80765	0.26249	3	1131	754.349	770.665	663.776	729.597	2.86308	0.0789246	3	1092	1.13615	0.184158	0.443122
Q960W0	7	1	35.2651	0.190779	0.719469	0.0816806	1.09284	0.229548	Control_Manganese	Experimental_No_Manganese	104899	LD32258p OS=Drosophila melanogaster OX=7227 GN=CG31643PA PE=2 SV=1	689.36	582.945	651.069	641.124	2.80694	0.0840708	3	1132	608.893	592.198	558.892	586.661	2.76839	0.0433915	3	1191	0.915051	-0.128076	0.188693
F3YDK4;Q8IMC4;Q95RR6;Q9V4D9	2	1	9.8362	0.0156497	1.80549	0.0142929	1.41723	0.849293	Experimental_No_Manganese	Control_Manganese	29673.4	Purine-rich binding protein-alpha_ isoform G OS=Drosophila melanogaster OX=7227 GN=Pur-alpha PE=2 SV=1	722.16	550.011	649.771	640.648	2.80662	0.134921	3	1133	933.961	947.887	841.994	907.947	2.95806	0.0633735	3	1010	1.41723	0.503078	0.0111716
Q7KMQ0	15	9	73.7703	0.139458	0.855558	0.0642842	1.19433	0.294153	Control_Manganese	Experimental_No_Manganese	48941	26S proteasome regulatory complex subunit p48B OS=Drosophila melanogaster OX=7227 GN=Rpt1 PE=1 SV=1	542.55	691.445	659.614	631.203	2.80017	0.12422	3	1137	480.228	515.738	589.538	528.502	2.72305	0.105508	3	1219	0.837293	-0.256196	0.138175
Q9V434	5	3	27.7192	0.00828617	2.08165	0.00936129	1.12614	0.94497	Experimental_No_Manganese	Control_Manganese	64501.9	Asparaginyl-tRNA synthetase_ isoform A OS=Drosophila melanogaster OX=7227 GN=AsnRS PE=1 SV=1	616.99	650.503	619.553	629.015	2.79866	0.0296539	3	1138	698.079	693.652	733.34	708.357	2.85025	0.0307032	3	1109	1.12614	0.171382	0.00867151
P18053	3	2	16.8568	0.40123	0.396606	0.141807	1.05974	0.113518	Control_Manganese	Experimental_No_Manganese	29753.9	Proteasome subunit alpha type-4 OS=Drosophila melanogaster OX=7227 GN=Prosalpha3 PE=1 SV=2	593.259	620.294	669.412	627.655	2.79772	0.0615094	3	1140	551.131	570.487	655.195	592.271	2.77252	0.0934481	3	1188	0.943626	-0.0837136	0.415143
Q9VLT0	4	1	21.8057	0.558891	0.252673	0.179071	1.06686	0.0790476	Control_Manganese	Experimental_No_Manganese	48285.8	Hexosyltransferase OS=Drosophila melanogaster OX=7227 GN=dbeta3GnT PE=2 SV=2	612.463	625.481	637.145	625.03	2.7959	0.0197545	3	1141	688.864	614.735	453.981	585.86	2.76779	0.204954	3	1193	0.937331	-0.0933689	0.604082
Q9V470	6	3	30.6337	0.0579433	1.237	0.0340597	1.25574	0.516024	Experimental_No_Manganese	Control_Manganese	45323.2	Succinate--CoA ligase [GDP-forming] subunit beta_ mitochondrial OS=Drosophila melanogaster OX=7227 GN=ScsbetaG PE=1 SV=1	556.057	597.826	717.268	623.717	2.79499	0.134141	3	1143	717.315	833.392	798.977	783.228	2.89389	0.0761199	3	1064	1.25574	0.328541	0.0547
Q9VX36	6	3	34.3576	0.449193	0.347567	0.154023	1.0445	0.100548	Experimental_No_Manganese	Control_Manganese	27123.9	NADH dehydrogenase (Ubiquinone) 24 kDa subunit_ isoform A OS=Drosophila melanogaster OX=7227 GN=ND-24 PE=1 SV=1	678.043	621.108	569.499	622.883	2.79441	0.0871649	3	1144	625.049	656.314	670.439	650.601	2.81331	0.035703	3	1155	1.0445	0.0628104	0.461862
A0A0B4KHK1;Q9VDE3	3	1	13.2624	0.490424	0.309428	0.16357	1.09406	0.091327	Experimental_No_Manganese	Control_Manganese	69364.5	Supernumerary limbs_ isoform B OS=Drosophila melanogaster OX=7227 GN=slmb PE=4 SV=1	687.692	589.724	587.911	621.776	2.79363	0.0918214	3	1146	734.317	555.274	751.184	680.258	2.83267	0.159598	3	1125	1.09406	0.129689	0.455329
A0A0B4KHU4;Q8IMU2;Q8SWX6	2	1	10.678	0.231006	0.636376	0.0939486	1.13522	0.194625	Experimental_No_Manganese	Control_Manganese	28220.1	Uncharacterized protein_ isoform C OS=Drosophila melanogaster OX=7227 GN=Dmel\CG11790 PE=1 SV=1	624.781	585.525	652.452	620.919	2.79303	0.054162	3	1147	802.437	704.085	608.119	704.88	2.84812	0.137841	3	1110	1.13522	0.182973	0.230145
Q9V3I0	3	2	10.6266	0.307275	0.512472	0.117526	1.0579	0.149057	Control_Manganese	Experimental_No_Manganese	34733.3	EG:BACR42I17.2 protein OS=Drosophila melanogaster OX=7227 GN=Dmel\CG11378 PE=2 SV=1	625.17	642.486	593.397	620.351	2.79264	0.0401338	3	1148	618.73	603.149	537.317	586.399	2.76819	0.0736938	3	1192	0.94527	-0.0812019	0.303694
Q24253	1	1	4.7738	0.0138295	1.85919	0.013153	1.40344	0.872497	Experimental_No_Manganese	Control_Manganese	101978	AP complex subunit beta OS=Drosophila melanogaster OX=7227 GN=AP-1-2beta PE=1 SV=1	690.417	552.929	616.922	620.089	2.79245	0.11095	3	1149	823.63	827.834	959.318	870.26	2.93965	0.0886567	3	1024	1.40344	0.488972	0.0137877
Q9VHQ5	4	3	17.1805	0.767188	0.115098	0.224132	1.06147	0.0571483	Control_Manganese	Experimental_No_Manganese	51490.1	RE12402p OS=Drosophila melanogaster OX=7227 GN=Dmel\CG11737 PE=2 SV=1	738.857	636.802	470.229	615.296	2.78908	0.22038	3	1150	639.204	544.249	555.535	579.663	2.76318	0.0894864	3	1196	0.942087	-0.0860678	0.692624
Q8INK2	8	2	58.5319	0.00171219	2.76645	0.00325599	1.99342	0.999567	Control_Manganese	Experimental_No_Manganese	12931.7	Fatty acid binding protein_ isoform A OS=Drosophila melanogaster OX=7227 GN=fabp PE=1 SV=1	518.127	687.399	639.986	615.171	2.789	0.141947	3	1151	288.888	312.449	324.464	308.6	2.4894	0.0586448	3	1335	0.50165	-0.995247	0.00399266
Q8IN97;Q9VEK7	3	3	17.0698	0.00484476	2.31473	0.00640189	1.36349	0.983354	Experimental_No_Manganese	Control_Manganese	19865.8	Cellular repressor of E1A-stimulated genes_ isoform C OS=Drosophila melanogaster OX=7227 GN=CREG PE=4 SV=1	617.702	648.68	578.891	615.091	2.78894	0.05685	3	1152	784.377	821.992	909.649	838.673	2.92359	0.076645	3	1040	1.36349	0.447308	0.00611968
M9PCU8	23	3	118.66	0.266495	0.574312	0.105223	1.07249	0.170823	Control_Manganese	Experimental_No_Manganese	128915	Uncharacterized protein_ isoform E OS=Drosophila melanogaster OX=7227 GN=Dmel\CG9674 PE=1 SV=1	558.749	623.603	662.104	614.819	2.78875	0.084959	3	1153	574.879	555.538	589.375	573.264	2.75835	0.0296132	3	1199	0.932411	-0.100962	0.260222
P25867;Q9VQ00;A0A0B4KHJ1	3	2	5.9294	0.000446723	3.34996	0.00157316	1.30434	1	Control_Manganese	Experimental_No_Manganese	16906.3	Ubiquitin-conjugating enzyme E2-17 kDa OS=Drosophila melanogaster OX=7227 GN=eff PE=2 SV=1	596.053	603.304	637.605	612.32	2.78698	0.0362473	3	1154	459.726	466.59	482.027	469.448	2.67159	0.024331	3	1254	0.76667	-0.383322	0.00058117
Q9VZX6	3	1	12.79	0.00968888	2.01373	0.0104622	1.178	0.926897	Control_Manganese	Experimental_No_Manganese	38006.3	LD06441p OS=Drosophila melanogaster OX=7227 GN=mRpS35 PE=1 SV=1	648.007	589.864	594.388	610.753	2.78587	0.0529539	3	1155	508.818	537.34	509.24	518.466	2.71472	0.0315293	3	1226	0.848897	-0.236339	0.011592
E1JHT6;Q9VMV9;E1JHT9;Q7KTP4;Q9VMW2;Q9VMW4	6	2	32.3891	0.0174868	1.75729	0.0151227	1.28854	0.826682	Experimental_No_Manganese	Control_Manganese	65501.2	Reticulon-like protein OS=Drosophila melanogaster OX=7227 GN=Rtnl1 PE=1 SV=1	562.386	640.14	629.488	610.671	2.78581	0.0690293	3	1156	732.076	865.48	763.075	786.877	2.89591	0.0887228	3	1059	1.28854	0.365742	0.0200809
Q94522	4	3	16.0184	0.00957884	2.01869	0.0104132	1.56208	0.928335	Experimental_No_Manganese	Control_Manganese	34788.2	Succinate--CoA ligase [ADP/GDP-forming] subunit alpha_ mitochondrial OS=Drosophila melanogaster OX=7227 GN=Scsalpha1 PE=2 SV=3	648.195	499.042	680.459	609.232	2.78478	0.158858	3	1157	931.478	980.972	942.554	951.668	2.97849	0.0272946	3	988	1.56208	0.643467	0.00408075
P27619;A4V4I8;E1JJA4;M9PHQ0;X2JE15;A4V4J0;E1JJA5;M9PJN9;P27619-2	17	6	74.5937	0.404312	0.393283	0.142477	1.13437	0.1126	Experimental_No_Manganese	Control_Manganese	98208.7	Dynamin OS=Drosophila melanogaster OX=7227 GN=shi PE=1 SV=2	780.029	556.547	479.502	605.359	2.78201	0.257857	3	1158	764.542	634.781	660.772	686.699	2.83677	0.0999793	3	1118	1.13437	0.181885	0.455139
Q8IN05	2	2	7.766	0.89319	0.0490561	0.249565	1.02416	0.0514535	Control_Manganese	Experimental_No_Manganese	159097	Liquid facets-Related_ isoform D OS=Drosophila melanogaster OX=7227 GN=lqfR PE=1 SV=2	732.207	537.165	519.742	596.372	2.77552	0.197795	3	1161	677.252	584.983	484.669	582.301	2.76515	0.165412	3	1195	0.976407	-0.0344453	0.880617
Q8IQQ9;Q8T4G5	4	3	18.4624	0.322002	0.492142	0.121648	1.08369	0.142327	Control_Manganese	Experimental_No_Manganese	76352.2	Uncharacterized protein_ isoform B OS=Drosophila melanogaster OX=7227 GN=DmCG6512 PE=1 SV=1	664.879	527.555	589.039	593.824	2.77366	0.115838	3	1162	550.703	553.733	539.466	547.967	2.73875	0.013717	3	1212	0.922777	-0.115946	0.315017
Q9W437	6	4	28.2402	0.0729108	1.13721	0.0400286	1.13573	0.453574	Experimental_No_Manganese	Control_Manganese	178893	Raptor_ isoform B OS=Drosophila melanogaster OX=7227 GN=raptor PE=1 SV=2	647.127	553.074	577.287	592.496	2.77269	0.0824245	3	1163	640.188	696.555	682.005	672.916	2.82796	0.0434854	3	1131	1.13573	0.183621	0.0707009
A1Z6I9	6	4	21.0997	0.0644944	1.19048	0.0368036	1.14517	0.486667	Experimental_No_Manganese	Control_Manganese	177799	Src oncogene at 42A_ isoform B OS=Drosophila melanogaster OX=7227 GN=Src42A PE=1 SV=2	589.902	562.979	621.747	591.542	2.77199	0.0497318	3	1164	643.072	739.004	650.169	677.415	2.83085	0.0789109	3	1128	1.14517	0.195558	0.0713887
Q9VL89	5	3	25.0533	0.788633	0.103125	0.228349	1.01416	0.0558462	Experimental_No_Manganese	Control_Manganese	50488.9	Methionine aminopeptidase 2 OS=Drosophila melanogaster OX=7227 GN=und PE=1 SV=1	558.649	574.033	604.875	579.186	2.76282	0.0406426	3	1167	615.662	542.66	603.837	587.386	2.76892	0.0667072	3	1189	1.01416	0.0202837	0.771518
Q9V4U7	4	1	23.5196	0.0564465	1.24836	0.0334819	1.13254	0.523247	Control_Manganese	Experimental_No_Manganese	58517.8	Probable cytochrome P450 6a14 OS=Drosophila melanogaster OX=7227 GN=Cyp6a14 PE=3 SV=3	548.015	595.37	592.55	578.645	2.76241	0.0459068	3	1168	550.093	483.885	498.799	510.926	2.70836	0.0679743	3	1231	0.882969	-0.179566	0.05508
P48604	9	4	40.5215	0.0573113	1.24176	0.0339434	1.09034	0.519049	Control_Manganese	Experimental_No_Manganese	24097.5	GrpE protein homolog_ mitochondrial OS=Drosophila melanogaster OX=7227 GN=Roe1 PE=2 SV=2	609.751	573.773	551.445	578.323	2.76217	0.050868	3	1170	538.428	537.235	515.562	530.408	2.72461	0.0242667	3	1218	0.917149	-0.124772	0.0610351
E1JGY5;E1JGY6;Q0E9N2;Q9V9A9	4	1	18.2361	0.117869	0.9286	0.0574492	1.14044	0.33244	Control_Manganese	Experimental_No_Manganese	159793	Lethal (2) 01289_ isoform J OS=Drosophila melanogaster OX=7227 GN=l(2)01289 PE=1 SV=1	546.197	608.858	578.43	577.828	2.7618	0.0542279	3	1171	448.216	539.245	532.549	506.67	2.70473	0.100131	3	1233	0.876852	-0.189594	0.107606
E1JIK0;P48810;P48810-2	3	2	14.6447	0.4036	0.394049	0.142391	1.07807	0.112811	Experimental_No_Manganese	Control_Manganese	39556.5	Heterogeneous nuclear ribonucleoprotein at 87F_ isoform C OS=Drosophila melanogaster OX=7227 GN=Hrb87F PE=1 SV=1	599.394	507.5	625.263	577.386	2.76147	0.10719	3	1172	688.164	588.268	590.952	622.461	2.79411	0.0914372	3	1172	1.07807	0.10845	0.405685
Q9VC18	10	5	48.3708	0.0001043	3.98172	0.000627234	2.03719	1	Experimental_No_Manganese	Control_Manganese	63836.8	RE29555p OS=Drosophila melanogaster OX=7227 GN=BEST:GH11240 PE=1 SV=1	588.927	559.312	554.477	567.572	2.75402	0.0328614	3	1173	1178.78	1064.14	1225.84	1156.25	3.06305	0.0719317	3	897	2.03719	1.02658	0.000279853
X2J9A5;Q9VII9	3	2	14.9401	0.0906092	1.04283	0.046788	1.33962	0.396848	Experimental_No_Manganese	Control_Manganese	35774.2	Uncharacterized protein_ isoform B OS=Drosophila melanogaster OX=7227 GN=CG9332 PE=1 SV=1	695.335	452.742	545.169	564.415	2.7516	0.216926	3	1174	813.178	782.966	672.159	756.101	2.87858	0.0981995	3	1073	1.33962	0.421823	0.0812561
Q00449	7	3	28.6102	0.220931	0.655743	0.0906197	1.14996	0.202452	Control_Manganese	Experimental_No_Manganese	143538	Multidrug resistance protein homolog 49 OS=Drosophila melanogaster OX=7227 GN=Mdr49 PE=2 SV=2	619.329	539.992	531.875	563.732	2.75107	0.0857133	3	1176	579.641	443.216	447.796	490.218	2.69039	0.158046	3	1242	0.869594	-0.201587	0.235631
Q9VRB3;X2JGA6	5	1	23.147	0.11395	0.943284	0.0557478	1.31493	0.340422	Experimental_No_Manganese	Control_Manganese	61333.2	Probable cytochrome P450 6v1 OS=Drosophila melanogaster OX=7227 GN=Cyp6v1 PE=2 SV=1	647.515	413.367	630.174	563.685	2.75104	0.231456	3	1177	748.007	749.295	726.314	741.206	2.86994	0.0174206	3	1084	1.31493	0.394984	0.0789244
M9PG40;Q8SYG3;D3DME9;M9PDD4	3	3	17.8868	0.410151	0.387056	0.143979	1.08526	0.110895	Experimental_No_Manganese	Control_Manganese	19374	Uncharacterized protein_ isoform D OS=Drosophila melanogaster OX=7227 GN=Dmel\CG40045 PE=1 SV=1	666.801	511.874	511.103	563.259	2.75071	0.1592	3	1179	643.559	623.294	567.001	611.284	2.78624	0.0648905	3	1178	1.08526	0.118045	0.444032
Q9VSL5	3	2	15.9172	0.0821412	1.08544	0.0437445	1.08463	0.422116	Control_Manganese	Experimental_No_Manganese	29190.8	Glutathione S transferase O2_ isoform A OS=Drosophila melanogaster OX=7227 GN=GstO2 PE=1 SV=2	569.415	584.795	526.94	560.383	2.74849	0.0534739	3	1181	500.886	526.114	522.98	516.66	2.7132	0.0266133	3	1228	0.921976	-0.117198	0.0832169
Q9VHF7;Q9VHF8	2	1	12.1632	0.179395	0.746189	0.0776572	1.30472	0.241516	Control_Manganese	Experimental_No_Manganese	28814.3	RE08710p OS=Drosophila melanogaster OX=7227 GN=Dmel\CG16749 PE=1 SV=1	540.905	659.565	478.787	559.752	2.748	0.164093	3	1182	527.194	436.795	323.077	429.022	2.63248	0.238403	3	1277	0.76645	-0.383736	0.174876
Q9I7P8;Q9VPB3	8	1	43.352	0.303741	0.517496	0.116288	1.15313	0.150753	Experimental_No_Manganese	Control_Manganese	30684.6	Tenzing norgay_ isoform B OS=Drosophila melanogaster OX=7227 GN=tzn PE=1 SV=1	452.833	565.246	654.433	557.504	2.74625	0.181206	3	1184	559.557	674.973	694.09	642.873	2.80813	0.113217	3	1163	1.15313	0.205552	0.30071
Q9VRP4	3	1	13.6719	0.208711	0.680454	0.0870699	1.19638	0.212716	Control_Manganese	Experimental_No_Manganese	57926.4	Bifunctional phosphopantetheine adenylyltransferase-Dephospho-CoA kinase OS=Drosophila melanogaster OX=7227 GN=Ppat-Dpck PE=1 SV=2	570.779	615.979	481.437	556.065	2.74513	0.123128	3	1185	472.636	383.504	538.226	464.788	2.66726	0.167085	3	1257	0.835853	-0.258679	0.201462
Q9VEX6	8	4	34.3358	0.245506	0.609937	0.0986298	1.23668	0.184246	Experimental_No_Manganese	Control_Manganese	68532	ATPase family AAA domain-containing protein 3A homolog OS=Drosophila melanogaster OX=7227 GN=bor PE=1 SV=2	742.654	417.972	501.415	554.013	2.74352	0.304344	3	1186	704.558	728.526	622.329	685.137	2.83578	0.0812953	3	1121	1.23668	0.306472	0.270059
Q9VH07	3	1	12.8698	0.699127	0.155444	0.209413	1.0404	0.0623077	Experimental_No_Manganese	Control_Manganese	50413.3	RuvB-like helicase 1 OS=Drosophila melanogaster OX=7227 GN=pont PE=1 SV=1	619.469	600.198	434.306	551.324	2.74141	0.184642	3	1187	601.379	592.509	526.897	573.595	2.75861	0.0709287	3	1198	1.0404	0.0571315	0.742692
Q9VRS6;Q9VRS3	5	1	38.4749	0.556414	0.254602	0.178717	1.0203	0.0794359	Experimental_No_Manganese	Control_Manganese	28358.8	Jonah 65Aiv OS=Drosophila melanogaster OX=7227 GN=Jon65Aiv PE=1 SV=1	535.809	550.034	561.432	549.092	2.73965	0.0233798	3	1188	532.201	584.486	564.021	560.236	2.74837	0.0470292	3	1204	1.0203	0.0289875	0.546138
P25161;M9PG62	9	6	48.9184	0.0594363	1.22595	0.0345733	1.21182	0.509021	Experimental_No_Manganese	Control_Manganese	56118.3	Probable 26S proteasome non-ATPase regulatory subunit 3 OS=Drosophila melanogaster OX=7227 GN=Rpn3 PE=2 SV=1	533.47	605.277	483.637	540.795	2.73303	0.113073	3	1192	612.479	657.607	695.959	655.348	2.81647	0.0637614	3	1153	1.21182	0.27718	0.0552879
Q8I0G5;A0A0B4KHL2;Q8I0G5-2;Q8I0G5-3	12	5	46.0803	8.34676e-05	4.07848	0.000526241	2.15924	1	Experimental_No_Manganese	Control_Manganese	98945.2	Coatomer subunit gamma OS=Drosophila melanogaster OX=7227 GN=gammaCOP PE=2 SV=1	542.608	510.52	546.7	533.276	2.72695	0.0371536	3	1193	1056.98	1200.94	1196.48	1151.47	3.06125	0.0710909	3	901	2.15924	1.11052	0.000220508
M9PGC1;M9PGV0;Q7KVY9;Q9W4Z0;M9PGJ2;E1JJB8;Q9W4Y9	3	2	12.3718	0.00262143	2.58146	0.00434194	2.11014	0.997506	Experimental_No_Manganese	Control_Manganese	221859	Protostome-specific GEF_ isoform G OS=Drosophila melanogaster OX=7227 GN=PsGEF PE=4 SV=1	456.103	594.858	538.773	529.911	2.7242	0.131722	3	1195	967.589	1107.72	1279.25	1118.19	3.04851	0.139596	3	915	2.11014	1.07734	0.00398145
A0A0B4K775;A0A0B4K864;Q7K4K7	4	2	16.5788	0.0346567	1.46021	0.0244532	1.23907	0.658191	Experimental_No_Manganese	Control_Manganese	70156.4	Centrosomin's beautiful sister_ isoform B OS=Drosophila melanogaster OX=7227 GN=cbs PE=4 SV=1	563.621	484.627	540.119	529.456	2.72383	0.0766108	3	1196	595.223	664.007	708.872	656.034	2.81693	0.0872554	3	1149	1.23907	0.309261	0.0353554
Q9VA52	4	1	22.4346	0.0778547	1.10872	0.0421314	1.22571	0.436164	Experimental_No_Manganese	Control_Manganese	61660.9	Uncharacterized protein_ isoform B OS=Drosophila melanogaster OX=7227 GN=CG9708 PE=4 SV=5	519.868	605.992	461.819	529.226	2.72364	0.137069	3	1197	605.865	695.912	644.265	648.681	2.81203	0.0696581	3	1157	1.22571	0.293623	0.072689
Q94515	1	1	6.734	0.00242114	2.61598	0.00409701	1.72152	0.998146	Experimental_No_Manganese	Control_Manganese	37384.6	Des-1 protein OS=Drosophila melanogaster OX=7227 GN=ifc PE=1 SV=1	591.892	468.535	521.311	527.246	2.72201	0.117388	3	1199	971.57	837.652	913.773	907.665	2.95793	0.0740006	3	1011	1.72152	0.783684	0.00195765
Q9VDM7	2	2	8.7552	0.814509	0.0891041	0.232982	1.05702	0.054465	Control_Manganese	Experimental_No_Manganese	42554.2	Uncharacterized protein OS=Drosophila melanogaster OX=7227 GN=Dmel\CG4335 PE=4 SV=1	616.68	568.888	386.267	523.945	2.71929	0.232092	3	1201	445.38	494.222	547.441	495.681	2.6952	0.102982	3	1238	0.946055	-0.0800038	0.729313
Q0KIE7	2	1	7.3991	0.99796	0.000887068	0.271475	1.0008	0.0500005	Control_Manganese	Experimental_No_Manganese	172108	Ankyrin_ isoform B OS=Drosophila melanogaster OX=7227 GN=Ank PE=1 SV=1	524.615	464.325	574.016	520.985	2.71683	0.105445	3	1202	580.291	492.236	489.185	520.571	2.71648	0.0993942	3	1224	0.999204	-0.00114885	0.992862
Q9VWV2;Q7KUW2;Q9VWV4;Q9VWV5	9	2	36.9638	0.0250893	1.60051	0.0194203	2.01016	0.742936	Control_Manganese	Experimental_No_Manganese	66543.4	Uncharacterized protein_ isoform D OS=Drosophila melanogaster OX=7227 GN=CG6267 PE=1 SV=2	501.824	535.983	504.984	514.263	2.71119	0.0367041	3	1204	161.24	299.634	306.621	255.832	2.40795	0.320497	3	1357	0.497472	-1.00731	0.0060054
Q9W1B9	11	2	48.7743	0.114563	0.940954	0.0559419	1.18286	0.339149	Control_Manganese	Experimental_No_Manganese	17901.8	GEO07602p1 OS=Drosophila melanogaster OX=7227 GN=RpL12 PE=1 SV=1	537.833	557.546	445.039	513.473	2.71052	0.117006	3	1205	414.653	472.112	415.523	434.096	2.63759	0.0758492	3	1276	0.845412	-0.242274	0.115222
A0A0B4K5Z8;A0A0B4K6T4;Q9VNF8	4	3	17.583	0.0243847	1.61288	0.0190122	1.30562	0.750037	Experimental_No_Manganese	Control_Manganese	88594.8	Protein transport protein SEC23 OS=Drosophila melanogaster OX=7227 GN=Sec23 PE=1 SV=1	584.28	487.389	464.124	511.931	2.70921	0.124483	3	1206	691.167	626.875	687.126	668.389	2.82503	0.053875	3	1137	1.30562	0.38474	0.0207942
M9PD73;M9PDF6;M9PDR0;Q9VIT9	6	3	32.8712	0.06761	1.16999	0.0379503	1.18402	0.473863	Experimental_No_Manganese	Control_Manganese	166997	Thioester-containing protein 4_ isoform B OS=Drosophila melanogaster OX=7227 GN=Tep4 PE=1 SV=1	489.421	462.816	575.573	509.27	2.70695	0.115736	3	1207	597.824	629.613	581.518	602.985	2.78031	0.0405641	3	1182	1.18402	0.243692	0.0637357
Q9Y119	6	2	27.7412	0.567473	0.246055	0.181227	1.04147	0.0777313	Control_Manganese	Experimental_No_Manganese	92104.6	BcDNA.GH08860 OS=Drosophila melanogaster OX=7227 GN=Tps1 PE=1 SV=1	452.931	529.166	542.396	508.164	2.706	0.0950255	3	1208	465.498	495.607	502.685	487.93	2.68836	0.0404699	3	1245	0.960182	-0.0586206	0.538529
Q9VRD0;Q9VRD1	4	2	22.7774	0.521505	0.282741	0.171018	1.05338	0.0853347	Control_Manganese	Experimental_No_Manganese	28477.1	RE66795p OS=Drosophila melanogaster OX=7227 GN=Ser6 PE=2 SV=1	538.178	443.213	536.987	506.126	2.70426	0.107655	3	1210	457.863	500.014	483.552	480.477	2.68167	0.0442126	3	1250	0.949322	-0.0750305	0.489767
Q9VDL4	4	3	15.6259	0.0338503	1.47044	0.0240579	1.17479	0.664577	Control_Manganese	Experimental_No_Manganese	48894.8	LP04613p OS=Drosophila melanogaster OX=7227 GN=Dmel\CG10877 PE=1 SV=1	542.188	491.093	460.975	498.085	2.6973	0.0824264	3	1212	429.986	409.712	432.234	423.977	2.62734	0.0292596	3	1281	0.851214	-0.232407	0.0402248
Q9VSR7	2	1	8.2232	0.0272299	1.56495	0.0205086	1.44046	0.722144	Experimental_No_Manganese	Control_Manganese	114125	RE41093p OS=Drosophila melanogaster OX=7227 GN=ValRS-m PE=2 SV=1	560.532	511.371	421.793	497.899	2.69714	0.141281	3	1213	791.126	732.833	627.653	717.204	2.85564	0.115517	3	1099	1.44046	0.526531	0.0250101
L7EEF1;Q7PLL1;Q7PLL3;Q8SYL3	3	2	14.4423	4.46859e-06	5.34983	0.000168408	3.80412	1	Experimental_No_Manganese	Control_Manganese	44698.1	Eukaryotic translation initiation factor 4B_ isoform F OS=Drosophila melanogaster OX=7227 GN=eIF4B PE=1 SV=1	520.566	476.341	486.162	494.357	2.69404	0.0469769	3	1214	1775.17	1946.43	1920.17	1880.59	3.27429	0.0490465	3	679	3.80412	1.92756	1.46228e-05
H1UUF3;M9MRY3;M9MS37;M9MS72;M9MS76;P16905;P16905-2;P16905-3;P16905-4;Q9VPA7	1	1	4.66	0.370236	0.431522	0.134626	1.24363	0.123507	Control_Manganese	Experimental_No_Manganese	35964.6	FI18174p1 OS=Drosophila melanogaster OX=7227 GN=Pka-R1 PE=1 SV=1	683.024	384.508	411.471	493.001	2.69285	0.334921	3	1215	402.834	406.165	380.259	396.419	2.59815	0.0355529	3	1295	0.804095	-0.314563	0.36986
Q0E8V8	13	1	75.8847	0.808198	0.092482	0.231953	1.00752	0.0547832	Control_Manganese	Experimental_No_Manganese	96050.3	MIP09469p OS=Drosophila melanogaster OX=7227 GN=Dmel\CG9380 PE=1 SV=2	508.699	483.907	483.99	492.199	2.69214	0.029032	3	1216	505.183	495.727	464.659	488.523	2.68889	0.0433974	3	1243	0.992533	-0.0108135	0.815628
Q95RV3	2	1	9.5294	0.0212793	1.67204	0.0173653	1.43252	0.78291	Control_Manganese	Experimental_No_Manganese	38984.2	LD09786p OS=Drosophila melanogaster OX=7227 GN=Lhr PE=2 SV=1	433.554	498.329	542.367	491.417	2.69145	0.111382	3	1217	303.991	334.324	390.813	343.043	2.53535	0.128447	3	1314	0.698069	-0.518559	0.0216306
P40796	15	6	71.6718	0.0107278	1.96949	0.0111667	1.46488	0.913228	Experimental_No_Manganese	Control_Manganese	44884.7	La protein homolog OS=Drosophila melanogaster OX=7227 GN=La PE=1 SV=2	509.747	435.062	512.31	485.706	2.68637	0.0903387	3	1218	785.802	720.271	628.425	711.499	2.85217	0.11111	3	1105	1.46488	0.550779	0.0123942
Q9VKZ8	7	7	39.1994	0.00906958	2.04241	0.00998658	1.32572	0.934954	Experimental_No_Manganese	Control_Manganese	54163.6	LP08774p OS=Drosophila melanogaster OX=7227 GN=Usp14 PE=1 SV=1	541.406	441.793	473.589	485.596	2.68628	0.104779	3	1219	648.822	649.764	632.708	643.765	2.80873	0.0148917	3	1161	1.32572	0.406777	0.00612346
Q9VIM5;X2JAI2	3	2	24.2984	0.154738	0.810403	0.0695242	1.34014	0.27172	Experimental_No_Manganese	Control_Manganese	35275.1	Actin-related protein 2/3 complex subunit 2 OS=Drosophila melanogaster OX=7227 GN=Arpc2 PE=2 SV=2	383.942	407.294	651.606	480.947	2.6821	0.308256	3	1222	564.933	651.434	717.242	644.537	2.80925	0.118517	3	1160	1.34014	0.422383	0.16456
Q9VA78	7	4	30.9233	0.0900414	1.04556	0.0465563	1.1528	0.398448	Control_Manganese	Experimental_No_Manganese	78834.2	Sphingomyelin phosphodiesterase OS=Drosophila melanogaster OX=7227 GN=Dmel\CG15533 PE=1 SV=1	497.669	439.916	493.991	477.192	2.67869	0.0677598	3	1223	402.029	455.198	384.603	413.943	2.61694	0.0888393	3	1286	0.867457	-0.205136	0.0889011
Q9VPR1	3	3	11.5197	0.000633955	3.19794	0.00189167	1.92727	0.999999	Experimental_No_Manganese	Control_Manganese	20238.4	GH02075p OS=Drosophila melanogaster OX=7227 GN=Tspo PE=1 SV=1	415.302	505.814	506.719	475.945	2.67756	0.110349	3	1225	947.985	904.47	899.368	917.274	2.9625	0.029128	3	1003	1.92727	0.946558	0.000203735
Q9VWL0	3	3	13.4331	0.377288	0.423327	0.136177	1.0791	0.121106	Control_Manganese	Experimental_No_Manganese	38838.7	Mec2 OS=Drosophila melanogaster OX=7227 GN=Mec2 PE=1 SV=1	469.662	480.36	476.878	475.633	2.67727	0.0114724	3	1226	512.417	385.58	424.315	440.77	2.64421	0.147469	3	1271	0.926702	-0.109823	0.40698
Q961J8	2	1	9.5052	0.345875	0.461081	0.127909	1.354	0.13245	Experimental_No_Manganese	Control_Manganese	46631.1	GH20109p OS=Drosophila melanogaster OX=7227 GN=Dmel\CG8560 PE=1 SV=1	605.081	194.081	625.907	475.023	2.67671	0.51266	3	1227	642.742	739.918	546.886	643.182	2.80833	0.150061	3	1162	1.354	0.43723	0.328513
A0A0B4KFA6;Q9VHX9	1	1	4.3907	0.321295	0.493097	0.12158	1.19256	0.142638	Control_Manganese	Experimental_No_Manganese	63132.6	CD98 heavy chain_ isoform D OS=Drosophila melanogaster OX=7227 GN=CD98hc PE=1 SV=1	500.105	470.896	453.356	474.786	2.6765	0.0497407	3	1228	546.556	353.246	294.569	398.124	2.60002	0.331183	3	1294	0.838533	-0.254061	0.377658
Q9VXN4	8	4	36.2808	0.00887352	2.0519	0.0097983	1.32101	0.937482	Experimental_No_Manganese	Control_Manganese	76489.5	Probable arginine--tRNA ligase_ cytoplasmic OS=Drosophila melanogaster OX=7227 GN=ArgRS PE=2 SV=1	441.504	514.856	449.247	468.536	2.67074	0.0860145	3	1231	578.896	640.473	637.458	618.943	2.79165	0.0560864	3	1173	1.32101	0.401646	0.00805722
Q9W3K4	6	2	28.4654	0.0510687	1.29185	0.0311912	1.30103	0.550997	Control_Manganese	Experimental_No_Manganese	72652.7	LD45266p OS=Drosophila melanogaster OX=7227 GN=Dmel\CG1575 PE=2 SV=1	401.613	514.571	484.302	466.829	2.66916	0.125252	3	1232	338.581	401.888	335.972	358.814	2.55487	0.104027	3	1308	0.76862	-0.379658	0.054265
A1Z9E4	3	2	13.102	0.263078	0.579915	0.104296	1.19321	0.172892	Experimental_No_Manganese	Control_Manganese	70787.6	MIP03776p OS=Drosophila melanogaster OX=7227 GN=Dmel\CG13330 PE=2 SV=1	358.114	462.765	567.378	462.752	2.66535	0.226108	3	1233	507.007	619.43	530.045	552.161	2.74207	0.10755	3	1210	1.19321	0.254848	0.267465
A0A0B4LFT2;Q27606	6	3	27.5335	0.0116097	1.93518	0.0117265	1.06153	0.901574	Experimental_No_Manganese	Control_Manganese	60864	Cytochrome P450-4e2_ isoform B OS=Drosophila melanogaster OX=7227 GN=Cyp4e2 PE=3 SV=1	452.257	471.415	463.015	462.229	2.66486	0.0207759	3	1234	484.578	494.571	492.864	490.671	2.69079	0.0108937	3	1241	1.06153	0.0861487	0.0109704
Q9VKD9	1	1	4.5438	0.0196046	1.70764	0.0162703	1.33497	0.801744	Experimental_No_Manganese	Control_Manganese	84238.2	MIP16835p1 OS=Drosophila melanogaster OX=7227 GN=Dmel\CG16965 PE=2 SV=2	490.219	432.788	463.402	462.136	2.66477	0.0621817	3	1235	659.531	537.582	653.701	616.938	2.79024	0.111496	3	1174	1.33497	0.416808	0.0228248
Q27268;M9PC90	10	3	48.9548	0.0289201	1.5388	0.0215327	1.37963	0.706518	Experimental_No_Manganese	Control_Manganese	49108.1	ATP-dependent RNA helicase WM6 OS=Drosophila melanogaster OX=7227 GN=Hel25E PE=1 SV=1	415.438	445.443	518.371	459.751	2.66252	0.115143	3	1237	548.917	664.011	689.931	634.286	2.80229	0.118337	3	1166	1.37963	0.464282	0.0301783
Q9VDK7	2	2	9.1676	0.0543821	1.26454	0.0326167	1.5987	0.533554	Experimental_No_Manganese	Control_Manganese	73478.4	Signal recognition particle subunit SRP72 OS=Drosophila melanogaster OX=7227 GN=Srp72 PE=1 SV=1	554.546	516.411	307.561	459.506	2.66229	0.28936	3	1238	741.479	719.94	742.414	734.611	2.86606	0.0173071	3	1088	1.5987	0.676897	0.0234301
Q9V3V6	6	2	25.7934	0.004728	2.32532	0.00630766	1.2136	0.984379	Experimental_No_Manganese	Control_Manganese	48034.9	26S proteasome regulatory complex subunit p50 OS=Drosophila melanogaster OX=7227 GN=Rpt5 PE=1 SV=1	467.736	456.244	451.912	458.631	2.66146	0.0178307	3	1239	576.808	521.342	571.625	556.592	2.74554	0.0550434	3	1208	1.2136	0.279287	0.00588204
Q9VBG1	4	3	16.3053	0.805121	0.094139	0.231579	1.01731	0.0549427	Control_Manganese	Experimental_No_Manganese	48468.6	Dipeptidase OS=Drosophila melanogaster OX=7227 GN=Dmel\CG6154 PE=2 SV=2	413.866	491.114	470.872	458.618	2.66145	0.0873397	3	1240	468.234	428.561	455.653	450.816	2.654	0.0449714	3	1264	0.982989	-0.0247525	0.778421
Q9VGT3	7	4	34.3859	0.292112	0.53445	0.113054	1.09079	0.15657	Experimental_No_Manganese	Control_Manganese	60346	GM04645p OS=Drosophila melanogaster OX=7227 GN=Ugt302C1 PE=1 SV=1	508.211	407.524	459.09	458.275	2.66113	0.109865	3	1241	480.815	537.764	481.063	499.88	2.69887	0.0656316	3	1237	1.09079	0.125369	0.296645
Q76NR0;D0IQK3;M9MS55;Q76NQ9;Q961Q7;Q9VY76;X2JEY5;X2JFA0;M9NDW2	8	5	40.3911	0.00216196	2.66515	0.00380198	1.53778	0.998812	Experimental_No_Manganese	Control_Manganese	89864.9	AMP deaminase OS=Drosophila melanogaster OX=7227 GN=AMPdeam PE=1 SV=2	501.765	412.939	449.273	454.659	2.65769	0.0982216	3	1243	727.72	668.055	701.719	699.165	2.84458	0.0427858	3	1113	1.53778	0.620847	0.00140293
Q8STG9	11	6	40.3052	0.371568	0.429961	0.134734	1.17068	0.123047	Experimental_No_Manganese	Control_Manganese	52641.1	DSec61alpha OS=Drosophila melanogaster OX=7227 GN=Sec61alpha PE=1 SV=1	536.303	300.605	526.383	454.43	2.65747	0.293355	3	1244	532.43	525.775	537.776	531.994	2.72591	0.0113017	3	1216	1.17068	0.227349	0.37102
Q9VXR9	3	3	15.4626	0.505234	0.296508	0.166871	1.08574	0.088378	Control_Manganese	Experimental_No_Manganese	38339.5	FI03680p OS=Drosophila melanogaster OX=7227 GN=Dmel\CG8128 PE=2 SV=1	430.371	387.354	541.417	453.047	2.65614	0.175468	3	1245	420.779	415.047	415.986	417.271	2.62042	0.00736801	3	1284	0.921031	-0.118678	0.479537
Q24400	3	1	14.9291	0.411878	0.385231	0.144325	1.11676	0.110399	Experimental_No_Manganese	Control_Manganese	55863.7	Muscle LIM protein Mlp84B OS=Drosophila melanogaster OX=7227 GN=Mlp84B PE=1 SV=1	479.059	503.767	376.112	452.979	2.65608	0.149467	3	1246	434.655	505.411	577.537	505.868	2.70404	0.141227	3	1234	1.11676	0.159315	0.404698
Q7K231	3	2	12.1364	0.475322	0.323013	0.160449	1.15672	0.0945234	Control_Manganese	Experimental_No_Manganese	59472.3	LD20635p OS=Drosophila melanogaster OX=7227 GN=CYC4 PE=1 SV=1	341.324	450.778	561.983	451.362	2.65452	0.244439	3	1247	353.251	355.603	461.773	390.209	2.5913	0.158857	3	1301	0.864515	-0.210036	0.449702
O18333	2	2	10.7952	0.0121367	1.9159	0.0119778	1.60859	0.894622	Control_Manganese	Experimental_No_Manganese	23731.7	GH01619p OS=Drosophila melanogaster OX=7227 GN=Rab2 PE=1 SV=1	499.346	455.538	397.726	450.87	2.65405	0.113049	3	1248	324.552	276.971	239.343	280.289	2.44761	0.152348	3	1349	0.621662	-0.685798	0.0113045
Q8IQ80;Q8IQ82	7	6	35.4731	6.45372e-05	4.19019	0.000490084	2.3157	1	Experimental_No_Manganese	Control_Manganese	78012.9	GH06117p OS=Drosophila melanogaster OX=7227 GN=pst PE=2 SV=2	480.168	408.957	461.356	450.16	2.65337	0.0819754	3	1249	1044.69	1032.89	1049.72	1042.43	3.01805	0.00828557	3	950	2.3157	1.21145	1.10765e-05
Q9VDZ2	3	1	12.896	0.905055	0.043325	0.25252	1.00894	0.0511463	Experimental_No_Manganese	Control_Manganese	34691.3	IP09474p OS=Drosophila melanogaster OX=7227 GN=Dmel\CG14282 PE=2 SV=1	312.178	497.206	537.767	449.051	2.6523	0.267803	3	1251	366.201	520.328	472.661	453.063	2.65616	0.17417	3	1263	1.00894	0.0128349	0.963776
Q8INY3	3	1	13.6657	0.0250879	1.60054	0.0194203	1.35549	0.742951	Control_Manganese	Experimental_No_Manganese	58499.2	FI02050p OS=Drosophila melanogaster OX=7227 GN=ninaD PE=1 SV=1	381.695	460.721	501.419	447.945	2.65122	0.135901	3	1252	349.508	322.291	319.599	330.466	2.51913	0.0500675	3	1321	0.737739	-0.438818	0.0321123
Q9VWI0	2	1	4.8991	0.047046	1.32748	0.03	1.33382	0.573816	Control_Manganese	Experimental_No_Manganese	20795.4	NADH dehydrogenase (Ubiquinone) 18 kDa subunit OS=Drosophila melanogaster OX=7227 GN=ND-18 PE=1 SV=2	372.632	472.576	489.836	445.015	2.64837	0.142189	3	1254	334.449	303.749	362.716	333.638	2.52328	0.0883942	3	1319	0.749724	-0.415569	0.050678
Q7KN61	1	1	5.566	0.136326	0.865422	0.0633636	1.32017	0.299182	Experimental_No_Manganese	Control_Manganese	48416.5	Farnesyl pyrophosphate synthase OS=Drosophila melanogaster OX=7227 GN=Fpps PE=1 SV=1	582.498	402.682	348.186	444.455	2.64783	0.275875	3	1255	645.994	554.869	559.404	586.756	2.76846	0.0875188	3	1190	1.32017	0.400722	0.137336
Q7KSW3;Q9VHZ5	3	2	15.8511	0.0476984	1.3215	0.0301246	1.36403	0.569984	Control_Manganese	Experimental_No_Manganese	26901.4	Sugarlethal_ isoform B OS=Drosophila melanogaster OX=7227 GN=sgll PE=1 SV=1	525.42	378.404	415.502	439.775	2.64323	0.173849	3	1256	309.737	351.537	305.953	322.409	2.50841	0.0784607	3	1327	0.733122	-0.447875	0.0650573
Q9V521	6	2	32.1676	0.321238	0.493174	0.12158	1.1259	0.142663	Control_Manganese	Experimental_No_Manganese	79570	Phenoloxidase 2 OS=Drosophila melanogaster OX=7227 GN=PPO2 PE=1 SV=1	389.552	405.571	523.157	439.427	2.64289	0.16602	3	1257	403.868	402.078	364.921	390.289	2.59139	0.0563362	3	1300	0.888178	-0.171079	0.326563
M9NDE0;Q8I0S6;Q9NHN2;Q9VPG4;Q9VPG5;D8FT20	5	3	24.2087	0.995059	0.0021512	0.271054	1.00228	0.0500031	Experimental_No_Manganese	Control_Manganese	47901.3	Fumble_ isoform G OS=Drosophila melanogaster OX=7227 GN=fbl PE=1 SV=1	472.858	432.342	410.226	438.475	2.64195	0.0724406	3	1258	489.064	399.314	430.053	439.477	2.64294	0.103785	3	1272	1.00228	0.00329173	0.976596
Q9VF15	1	1	3.6379	0.00770036	2.11349	0.00893801	1.69558	0.952271	Control_Manganese	Experimental_No_Manganese	17145.4	GEO09476p1 OS=Drosophila melanogaster OX=7227 GN=glob1 PE=1 SV=1	386.035	398.657	513.352	432.681	2.63617	0.162122	3	1259	268.4	268.995	228.151	255.182	2.40685	0.0917452	3	1358	0.589769	-0.761777	0.014176
Q94915	5	2	29.6984	0.00705254	2.15165	0.00835391	1.45397	0.960086	Control_Manganese	Experimental_No_Manganese	30398.5	Rhythmically expressed gene 2 protein OS=Drosophila melanogaster OX=7227 GN=Reg-2 PE=2 SV=1	469.003	441.029	387.265	432.432	2.63592	0.096065	3	1260	274.301	322.656	295.291	297.416	2.47336	0.0815276	3	1343	0.687774	-0.539993	0.00826846
Q9VZI3	5	1	23.2317	0.173017	0.761911	0.0757349	1.22345	0.248724	Experimental_No_Manganese	Control_Manganese	81010	Unc-112-related protein OS=Drosophila melanogaster OX=7227 GN=Fit1 PE=1 SV=1	368.476	422.872	500.842	430.73	2.63421	0.154463	3	1262	531.008	449.272	600.657	526.979	2.72179	0.143788	3	1222	1.22345	0.290961	0.173625
O02195	6	3	33.6192	0.368295	0.433804	0.13442	1.05741	0.124181	Control_Manganese	Experimental_No_Manganese	36387.7	Eukaryotic translation initiation factor 3 subunit I OS=Drosophila melanogaster OX=7227 GN=eIF3i PE=1 SV=1	466.971	409.143	407.73	427.948	2.63139	0.0789876	3	1263	384.244	403.07	426.829	404.715	2.60715	0.0527284	3	1291	0.94571	-0.0805302	0.371052
Q9VV49	4	2	21.1968	0.103712	0.984172	0.0515779	1.28798	0.363127	Experimental_No_Manganese	Control_Manganese	43767.2	RE72803p OS=Drosophila melanogaster OX=7227 GN=Agpat4 PE=2 SV=1	524.612	358.309	391.832	424.918	2.6283	0.206981	3	1265	596.969	500.833	544.055	547.285	2.73821	0.0879785	3	1213	1.28798	0.36511	0.102051
A1ZB73	8	6	48.2313	0.0256314	1.59123	0.0196454	1.21365	0.737562	Experimental_No_Manganese	Control_Manganese	24946.7	Glutathione S transferase E8_ isoform A OS=Drosophila melanogaster OX=7227 GN=GstE8 PE=4 SV=1	420.891	390.32	456.216	422.475	2.6258	0.0780556	3	1266	535.124	523.469	479.616	512.737	2.70989	0.0570841	3	1230	1.21365	0.27935	0.0238914
Q5U191;Q7JQU9	5	1	22.6332	0.000587465	3.23102	0.00182171	2.53998	0.999999	Experimental_No_Manganese	Control_Manganese	50606	RE40534p OS=Drosophila melanogaster OX=7227 GN=Dmel\CG1882 PE=1 SV=1	368.637	403.705	490	420.781	2.62406	0.148432	3	1267	1162.29	1003.98	1040.06	1068.78	3.02889	0.0776313	3	937	2.53998	1.34482	0.000415788
X2JGK6;E1JHY0;Q0E8F4;Q0E8F5;Q4LDP7;Q9I7R1	4	1	19.2999	0.24196	0.616257	0.0975056	1.10854	0.186695	Experimental_No_Manganese	Control_Manganese	37561.5	NADH-cytochrome b5 reductase OS=Drosophila melanogaster OX=7227 GN=Dmel\CG5946 PE=1 SV=1	428.34	457.713	372.534	419.529	2.62276	0.103134	3	1268	504.654	460.047	430.497	465.066	2.66751	0.0802731	3	1256	1.10854	0.148665	0.239654
Q9VQL9	4	1	19.0132	0.634826	0.197346	0.195547	1.05285	0.0688194	Control_Manganese	Experimental_No_Manganese	38892.4	Serine/threonine-protein phosphatase OS=Drosophila melanogaster OX=7227 GN=PpD6 PE=3 SV=1	407.623	410.876	439.076	419.192	2.62241	0.0412627	3	1269	488.651	311.894	393.904	398.149	2.60005	0.222166	3	1293	0.949802	-0.0743008	0.706625
Q7KSB5;Q9VDP9	1	1	5.5736	0.810925	0.0910191	0.232504	1.05074	0.0546442	Experimental_No_Manganese	Control_Manganese	36751.4	S-formylglutathione hydrolase OS=Drosophila melanogaster OX=7227 GN=Dmel\CG4390 PE=1 SV=1	507.028	334.311	411.58	417.639	2.6208	0.207159	3	1270	416.912	551.153	348.427	438.83	2.6423	0.235	3	1273	1.05074	0.0714048	0.798609
A0A0B4LFP4;A8DYH2	1	1	5.6282	0.00283725	2.5471	0.00450839	1.26713	0.996691	Control_Manganese	Experimental_No_Manganese	9437.92	Ubiquitin-fold modifier 1 OS=Drosophila melanogaster OX=7227 GN=Ufm1 PE=3 SV=1	432.141	409.672	407.385	416.399	2.61951	0.0328552	3	1271	331.481	309.793	344.576	328.617	2.51669	0.0534587	3	1323	0.789186	-0.341563	0.00240533
Q7KLI1;Q9U8R4	1	1	4.6793	1.10134e-05	4.95808	0.000201699	5.01527	1	Experimental_No_Manganese	Control_Manganese	167273	Apaf-1 related killer DARK OS=Drosophila melanogaster OX=7227 GN=Dark PE=1 SV=1	404.415	433.57	410.154	416.047	2.61914	0.0371231	3	1272	2317.92	1929.75	2012.09	2086.59	3.31944	0.0980205	3	636	5.01527	2.32633	0.000146562
Q7KMP8	5	3	23.2794	0.279714	0.553285	0.109229	1.19007	0.163204	Control_Manganese	Experimental_No_Manganese	43994.9	26S proteasome regulatory complex subunit p39A OS=Drosophila melanogaster OX=7227 GN=Rpn9 PE=1 SV=1	480.155	414.756	321.385	405.432	2.60792	0.196813	3	1274	381.255	314.108	326.67	340.678	2.53234	0.104785	3	1317	0.840284	-0.251051	0.268775
Q94519;M9PDU4;Q94519-2	3	2	9.3602	0.400952	0.396907	0.141807	1.07844	0.113602	Experimental_No_Manganese	Control_Manganese	17349.1	Acyl carrier protein_ mitochondrial OS=Drosophila melanogaster OX=7227 GN=ND-ACP PE=2 SV=1	454.448	389.7	345.102	396.417	2.59815	0.138696	3	1276	426.672	452.115	403.749	427.512	2.63095	0.056593	3	1278	1.07844	0.108946	0.420617
A0A0B4K6C1	3	1	16.8421	0.931783	0.030685	0.258685	1.05597	0.0505897	Control_Manganese	Experimental_No_Manganese	112106	Shal K[+] channel interacting protein_ isoform G OS=Drosophila melanogaster OX=7227 GN=SKIP PE=4 SV=1	534.894	268.991	370.799	391.561	2.5928	0.342632	3	1278	367.434	332.777	412.214	370.808	2.56915	0.107403	3	1306	0.946999	-0.0785654	0.809965
Q9VXQ5	3	3	4.4942	0.0146988	1.83272	0.0136153	1.43851	0.861326	Experimental_No_Manganese	Control_Manganese	58531.5	Chaperonin containing TCP1 subunit 6 OS=Drosophila melanogaster OX=7227 GN=CCT6 PE=1 SV=1	327.661	441.02	404.929	391.203	2.5924	0.148037	3	1279	571.814	542.419	574.019	562.751	2.75032	0.0313496	3	1202	1.43851	0.524577	0.00799807
D2NUK9;Q9U3Z7	3	2	15.7834	0.122235	0.912805	0.0588434	1.27778	0.323958	Control_Manganese	Experimental_No_Manganese	14054.2	Hoi-polloi_ isoform B OS=Drosophila melanogaster OX=7227 GN=hoip PE=1 SV=1	326.751	446.827	395.61	389.729	2.59076	0.154604	3	1280	309.433	346.913	258.67	305.005	2.48431	0.145204	3	1336	0.782608	-0.353638	0.121221
A0A0B4LHM3	6	3	25.0754	0.363379	0.439641	0.133498	1.09504	0.125919	Experimental_No_Manganese	Control_Manganese	79305.9	Uncharacterized protein_ isoform D OS=Drosophila melanogaster OX=7227 GN=Dmel\CG10175 PE=3 SV=1	412.714	393.389	331.823	379.308	2.57899	0.111371	3	1281	391.971	387.723	466.376	415.357	2.61842	0.106499	3	1285	1.09504	0.130979	0.36507
Q9W266	2	2	9.5807	0.123387	0.908731	0.0593249	1.51298	0.321788	Experimental_No_Manganese	Control_Manganese	75224.2	Protein windpipe OS=Drosophila melanogaster OX=7227 GN=wdp PE=1 SV=1	499.616	227.42	402.428	376.488	2.57575	0.366384	3	1282	616.448	551.907	540.503	569.619	2.75558	0.0718959	3	1201	1.51298	0.597394	0.0807127
Q9VH81	2	2	13.4622	0.231185	0.63604	0.0939486	1.18446	0.19449	Control_Manganese	Experimental_No_Manganese	60062.2	GH12714p OS=Drosophila melanogaster OX=7227 GN=PpD3 PE=1 SV=1	299.311	418.401	410.968	376.227	2.57545	0.177325	3	1283	306.333	336.016	310.554	317.634	2.50193	0.0505547	3	1329	0.844263	-0.244235	0.213241
M9PEW1;C0PDF4;Q9I7R0	3	1	17.513	0.674077	0.17129	0.203773	1.05261	0.0646385	Experimental_No_Manganese	Control_Manganese	25257.8	Uncharacterized protein_ isoform E OS=Drosophila melanogaster OX=7227 GN=Dmel\CG18815 PE=1 SV=1	295.614	474.918	345.393	371.975	2.57051	0.248835	3	1285	365.5	373.295	435.839	391.545	2.59278	0.0984749	3	1297	1.05261	0.0739696	0.752333
Q9VDE2	1	1	5.7067	0.124892	0.903467	0.059901	1.42545	0.318995	Experimental_No_Manganese	Control_Manganese	23961.6	Uncharacterized protein_ isoform B OS=Drosophila melanogaster OX=7227 GN=FBgn0038858 PE=1 SV=3	252.272	414.993	444.413	370.559	2.56886	0.279281	3	1286	449.491	551.189	583.962	528.214	2.72281	0.132744	3	1220	1.42545	0.511418	0.0942789
Q76NQ0	8	4	32.8637	0.286466	0.542928	0.11142	1.12195	0.159534	Experimental_No_Manganese	Control_Manganese	51766.8	Dolichyl-diphosphooligosaccharide--protein glycosyltransferase subunit 1 OS=Drosophila melanogaster OX=7227 GN=OST PE=1 SV=1	361.111	403.448	335.287	366.615	2.56421	0.0938643	3	1288	364.681	399.537	469.757	411.325	2.61419	0.130117	3	1287	1.12195	0.166011	0.290479
A1Z9E3	9	7	47.48	0.00540618	2.26711	0.00686117	1.65898	0.978083	Experimental_No_Manganese	Control_Manganese	54505.9	Elongation factor Tu OS=Drosophila melanogaster OX=7227 GN=mEFTu1 PE=1 SV=1	417.906	354.427	323.976	365.436	2.56281	0.131139	3	1289	671.859	589.644	557.251	606.251	2.78265	0.0974536	3	1180	1.65898	0.730296	0.00538838
Q9VJJ0	2	1	10.4862	0.200756	0.697331	0.0847563	1.23029	0.219903	Control_Manganese	Experimental_No_Manganese	22538.7	Proteasome subunit beta OS=Drosophila melanogaster OX=7227 GN=Prosbeta4 PE=1 SV=1	346.839	432.892	316.204	365.311	2.56266	0.165605	3	1290	256.104	278.129	356.557	296.93	2.47265	0.177819	3	1344	0.812814	-0.299004	0.214235
A0A0B4KG54;A0A0B4LFH0;Q9V813	4	3	19.9591	0.0218289	1.66097	0.0176297	1.21809	0.7769	Control_Manganese	Experimental_No_Manganese	40919.8	S-methyl-5'-thioadenosine phosphorylase OS=Drosophila melanogaster OX=7227 GN=Mtap PE=3 SV=1	375.967	343.08	375.406	364.818	2.56208	0.0516081	3	1291	282.209	326.774	289.515	299.499	2.4764	0.0798053	3	1341	0.820955	-0.284625	0.0205043
A0A0B4JDD0;E1JIF4;Q8WTI8	9	2	39.4325	0.131687	0.880457	0.0620935	1.33261	0.306933	Experimental_No_Manganese	Control_Manganese	144444	PFTAIRE-interacting factor 1A_ isoform H OS=Drosophila melanogaster OX=7227 GN=Pif1A PE=4 SV=1	423.782	259.269	407.65	363.567	2.56058	0.24943	3	1292	519.261	448.228	485.987	484.492	2.68529	0.0733556	3	1246	1.33261	0.414253	0.0979376
Q95V50	3	1	13.0544	0.0156416	1.80572	0.0142929	1.29906	0.849394	Experimental_No_Manganese	Control_Manganese	67495.7	Ppr-Y OS=Drosophila melanogaster OX=7227 GN=Ppr-Y PE=2 SV=1	333.516	375.048	365.706	358.09	2.55399	0.0608462	3	1294	418.565	501.535	475.441	465.18	2.66762	0.0912038	3	1255	1.29906	0.377468	0.0177043
Q7K209	4	2	30.7695	0.248929	0.603925	0.0999021	1.13093	0.181935	Control_Manganese	Experimental_No_Manganese	38959.2	LD25963p OS=Drosophila melanogaster OX=7227 GN=Dera PE=1 SV=1	397.973	306.261	358.262	354.165	2.54921	0.129863	3	1295	338.672	311.226	289.594	313.164	2.49577	0.078542	3	1334	0.884231	-0.177505	0.244972
A0A0B4KFS3;Q8T4A5	3	2	9.4225	0.156634	0.805115	0.0702951	1.09576	0.269157	Control_Manganese	Experimental_No_Manganese	30889	Uncharacterized protein_ isoform B OS=Drosophila melanogaster OX=7227 GN=Dmel\CG14721 PE=4 SV=1	327.85	340.584	364.623	344.352	2.537	0.0542293	3	1299	304.281	297.065	341.434	314.26	2.49729	0.0757601	3	1331	0.912612	-0.131927	0.16007
Q7KVX5;Q9W4N8	2	2	10.4135	0.194454	0.711182	0.0828006	1.1251	0.225909	Experimental_No_Manganese	Control_Manganese	26999.6	VAMP-associated protein 33kDa_ isoform A OS=Drosophila melanogaster OX=7227 GN=Vap33 PE=1 SV=1	349.338	355.011	327.851	344.067	2.53664	0.0416404	3	1300	385.065	342.048	434.22	387.111	2.58784	0.119139	3	1303	1.1251	0.170059	0.197523
A1Z9A8	3	2	13.7993	0.0168544	1.77329	0.0148555	1.12783	0.834366	Control_Manganese	Experimental_No_Manganese	74663	Protein PTCD3 homolog_ mitochondrial OS=Drosophila melanogaster OX=7227 GN=CG4679 PE=2 SV=1	332.835	362.994	335.683	343.837	2.53635	0.0484274	3	1301	307.304	309.888	297.406	304.866	2.48411	0.0216123	3	1337	0.886658	-0.173551	0.0196143
Q8IN96;A0A0B4KGC5;Q9VEJ3	7	4	27.8682	0.210503	0.676741	0.0875366	1.13152	0.211154	Experimental_No_Manganese	Control_Manganese	18229.8	Pyrroline-5-carboxylate reductase-like 2_ isoform B OS=Drosophila melanogaster OX=7227 GN=P5cr-2 PE=1 SV=1	332.715	350.122	336.236	339.691	2.53108	0.0270941	3	1302	435.419	384.732	332.946	384.366	2.58474	0.133303	3	1304	1.13152	0.178257	0.211364
Q9VTU4	6	1	31.4218	0.0192416	1.71576	0.0161058	1.68209	0.805929	Control_Manganese	Experimental_No_Manganese	63850.7	Eukaryotic translation initiation factor 3 subunit L OS=Drosophila melanogaster OX=7227 GN=eIF3l PE=2 SV=1	279.073	353.976	376.608	336.552	2.52705	0.151681	3	1303	213.545	161.517	225.177	200.08	2.3012	0.169429	3	1379	0.594498	-0.750256	0.0181876
Q9VQR8	7	3	32.0174	0.375277	0.425648	0.135827	1.26356	0.121783	Experimental_No_Manganese	Control_Manganese	135786	Leucyl-tRNA synthetase_ isoform A OS=Drosophila melanogaster OX=7227 GN=LeuRS PE=1 SV=2	438.214	186.396	382.33	335.647	2.52588	0.393987	3	1304	519.153	387.785	365.39	424.11	2.62748	0.195866	3	1280	1.26356	0.337493	0.382072
Q9VB05	9	2	44.4996	0.296689	0.527699	0.114147	1.19105	0.154236	Experimental_No_Manganese	Control_Manganese	92995.2	ALG-2 interacting protein X OS=Drosophila melanogaster OX=7227 GN=ALiX PE=1 SV=1	361.027	357.485	276.906	331.806	2.52088	0.143391	3	1306	477.182	383.985	324.429	395.198	2.59682	0.194817	3	1296	1.19105	0.252237	0.291806
P12426;X2J8L3	3	1	16.4864	0.0590031	1.22913	0.0344276	2.41588	0.511033	Experimental_No_Manganese	Control_Manganese	19804.1	Adenine phosphoribosyltransferase OS=Drosophila melanogaster OX=7227 GN=Aprt PE=2 SV=3	429.065	135.874	428.316	331.085	2.51994	0.510618	3	1307	752.274	838.88	808.433	799.862	2.90302	0.0549275	3	1055	2.41588	1.27255	0.00967331
Q8SZA8	1	1	5.3379	0.527879	0.277466	0.172143	1.18936	0.0841957	Control_Manganese	Experimental_No_Manganese	16691.9	Ferredoxin 2 OS=Drosophila melanogaster OX=7227 GN=Fdx2 PE=1 SV=1	226.805	417.139	344.704	329.549	2.51792	0.291513	3	1308	196.475	337.931	296.839	277.082	2.44261	0.262625	3	1351	0.84079	-0.250183	0.492772
Q9W478	10	3	47.705	0.000279646	3.55339	0.00111543	4.85699	1	Experimental_No_Manganese	Control_Manganese	50643.6	RE43153p OS=Drosophila melanogaster OX=7227 GN=Dmel\CG3097 PE=2 SV=2	408.469	266.139	289.112	321.24	2.50683	0.237863	3	1310	1612.93	1485.59	1582.26	1560.26	3.1932	0.0425945	3	760	4.85699	2.28006	2.93143e-05
A0A0B4K697;A0A0B4K7C4;A0A0B4KHL4;Q4AB31;Q59DW8;Q86BR9;Q86NK8;Q8IHB0	3	2	13.1577	0.0165635	1.78085	0.0146815	1.7261	0.837937	Experimental_No_Manganese	Control_Manganese	58866.3	Gilgamesh_ isoform J OS=Drosophila melanogaster OX=7227 GN=gish PE=1 SV=1	250.443	348.712	360.421	319.859	2.50496	0.188833	3	1311	579.808	604.919	471.598	552.108	2.74202	0.128318	3	1211	1.7261	0.787515	0.0124386
E1JHE4;Q9VKU1	16	6	69.5395	0.0841624	1.07488	0.0443974	1.1225	0.4158	Experimental_No_Manganese	Control_Manganese	84828.9	Fatty acid (Long chain) transport protein_ isoform F OS=Drosophila melanogaster OX=7227 GN=Fatp1 PE=1 SV=3	337.349	304.41	312.873	318.211	2.50271	0.0537554	3	1312	359.765	380.243	331.566	357.192	2.5529	0.0684233	3	1309	1.1225	0.166716	0.0863681
Q9W1V2	3	1	19.8988	0.00619465	2.20798	0.00764745	1.30437	0.969865	Experimental_No_Manganese	Control_Manganese	51095.7	CG3085 protein OS=Drosophila melanogaster OX=7227 GN=anon-WO0140519.123 PE=2 SV=1	300.282	294.761	339.754	311.599	2.4936	0.0787515	3	1314	393.008	400.655	425.661	406.441	2.609	0.0420186	3	1290	1.30437	0.383356	0.00534701
Q9V3A0	5	3	26.0837	3.18601e-05	4.49675	0.000401739	2.16428	1	Experimental_No_Manganese	Control_Manganese	28209.2	CG8997 protein OS=Drosophila melanogaster OX=7227 GN=Dmel\CG8997 PE=1 SV=1	302.967	324.749	298.342	308.686	2.48952	0.0456836	3	1315	662.21	640.571	701.463	668.081	2.82483	0.0462031	3	1138	2.16428	1.11388	5.19649e-05
Q9VEC1	4	1	18.5863	0.000631457	3.19966	0.00189167	2.37009	0.999999	Experimental_No_Manganese	Control_Manganese	72355.4	Mediator of RNA polymerase II transcription subunit 17 OS=Drosophila melanogaster OX=7227 GN=MED17 PE=1 SV=1	271.635	295.016	358.19	308.28	2.48895	0.145244	3	1316	682.107	738.806	771.04	730.651	2.86371	0.0616214	3	1090	2.37009	1.24494	0.000324098
Q9NEF6;X2JE14	6	2	31.1898	0.393486	0.40507	0.140175	1.17196	0.115882	Experimental_No_Manganese	Control_Manganese	28137.8	Probable V-type proton ATPase subunit D 2 OS=Drosophila melanogaster OX=7227 GN=Vha36-3 PE=3 SV=1	363.78	211.903	342.92	306.201	2.48601	0.268869	3	1317	314.637	412.296	349.632	358.855	2.55492	0.137878	3	1307	1.17196	0.228922	0.396141
Q9VC05	5	3	23.4247	0.43302	0.363492	0.149792	1.07649	0.104623	Experimental_No_Manganese	Control_Manganese	90237.4	Oxysterol-binding protein OS=Drosophila melanogaster OX=7227 GN=Osbp PE=1 SV=1	303.351	305.809	309.076	306.079	2.48583	0.00938227	3	1318	297.171	309.656	381.645	329.491	2.51784	0.138385	3	1322	1.07649	0.106335	0.424912
Q8MSI2	5	2	27.9302	0.613656	0.212075	0.190834	1.0272	0.0713672	Experimental_No_Manganese	Control_Manganese	21932.6	GH15296p OS=Drosophila melanogaster OX=7227 GN=Scp1 PE=1 SV=1	305.871	300.201	311.153	305.741	2.48535	0.0179137	3	1319	289.228	337.246	315.695	314.056	2.49701	0.0765821	3	1332	1.0272	0.0387114	0.590656
Q7K2W6	4	1	17.7328	0.727153	0.138374	0.215007	1.1193	0.0599849	Control_Manganese	Experimental_No_Manganese	79490.3	GH04080p OS=Drosophila melanogaster OX=7227 GN=PPO1 PE=1 SV=1	537.489	232.168	142.045	303.901	2.48273	0.681971	3	1320	564.743	144.894	104.894	271.51	2.43379	0.938209	3	1354	0.893417	-0.162595	0.872644
Q8IQX5;Q9VWQ7	4	2	18.1087	0.100981	0.995759	0.0508017	1.26051	0.369684	Experimental_No_Manganese	Control_Manganese	16661.8	Uncharacterized protein_ isoform B OS=Drosophila melanogaster OX=7227 GN=Dmel\CG6891 PE=1 SV=1	258.975	280.7	371.261	303.645	2.48237	0.196137	3	1321	389.465	358.027	400.751	382.747	2.58291	0.0578447	3	1305	1.26051	0.334007	0.0972879
Q8MT77;X2JAE9	6	3	24.7729	0.0108108	1.96614	0.0111796	1.43206	0.912131	Control_Manganese	Experimental_No_Manganese	146914	LD28489p OS=Drosophila melanogaster OX=7227 GN=CG17338 PE=2 SV=1	318.856	328.23	257.12	301.402	2.47915	0.128183	3	1323	204.542	211.162	215.697	210.467	2.32318	0.0266537	3	1374	0.698293	-0.518096	0.0156757
A1Z757;Q7JY97	5	1	21.5076	0.990374	0.00420082	0.270343	1.04658	0.0500117	Experimental_No_Manganese	Control_Manganese	62150.7	Photorepair_ isoform B OS=Drosophila melanogaster OX=7227 GN=phr PE=1 SV=1	343.833	244.922	271.686	286.813	2.4576	0.178378	3	1325	177.417	339.954	383.146	300.172	2.47737	0.361394	3	1340	1.04658	0.0656772	0.856426
Q05547	5	1	30.3967	0.300136	0.522683	0.115209	1.56273	0.152517	Experimental_No_Manganese	Control_Manganese	35299.4	Serine/threonine-protein phosphatase alpha-3 isoform OS=Drosophila melanogaster OX=7227 GN=Pp1-13C PE=1 SV=1	361.337	62.631	433.392	285.786	2.45604	0.687883	3	1326	465.364	455.798	418.659	446.607	2.64993	0.0552429	3	1266	1.56273	0.644068	0.232475
M9PBL9;Q9VZP0;Q9VZP1	3	1	11.6466	0.884988	0.0530627	0.247628	1.04364	0.0516877	Control_Manganese	Experimental_No_Manganese	113287	Uncharacterized protein_ isoform J OS=Drosophila melanogaster OX=7227 GN=CG14972 PE=4 SV=1	205.96	325.063	323.018	284.68	2.45436	0.239502	3	1327	239.888	299.486	278.957	272.777	2.43581	0.110992	3	1353	0.958187	-0.0616207	0.79596
Q9VP48;B5RJ70;M9PG39;Q8IPT6	6	4	17.9445	0.455984	0.341051	0.155037	1.04245	0.0989182	Experimental_No_Manganese	Control_Manganese	43208.1	Ras-related protein Rab-26 OS=Drosophila melanogaster OX=7227 GN=Rab26 PE=2 SV=2	273.285	278.068	293.912	281.755	2.44987	0.0383181	3	1328	299.837	311.785	269.527	293.717	2.46793	0.0741659	3	1347	1.04245	0.0599828	0.442145
A8MZR4;Q9VVC3	1	1	4.3702	0.0420484	1.37625	0.0277643	2.39881	0.605031	Experimental_No_Manganese	Control_Manganese	51233.3	Cuticular protein 73D_ isoform C OS=Drosophila melanogaster OX=7227 GN=Cpr73D PE=2 SV=1	160.199	189.792	471.941	273.977	2.43771	0.628077	3	1332	614.591	674.227	682.841	657.22	2.81771	0.0565539	3	1147	2.39881	1.26232	0.019595
A0A0B4LHF7;Q9VD51	3	1	12.64	0.320538	0.494121	0.12158	1.13803	0.142973	Control_Manganese	Experimental_No_Manganese	77213	Pitchoune_ isoform C OS=Drosophila melanogaster OX=7227 GN=pit PE=3 SV=1	230.996	323.874	267.034	273.968	2.4377	0.170917	3	1333	261.933	226.589	233.697	240.739	2.38155	0.0776565	3	1362	0.878714	-0.186535	0.317361
M9NEV7;Q9VII1	4	3	16.8716	0.0538186	1.26907	0.032415	1.65083	0.53644	Experimental_No_Manganese	Control_Manganese	12888.7	Uncharacterized protein_ isoform B OS=Drosophila melanogaster OX=7227 GN=Dmel\CG9336 PE=1 SV=1	358.347	179.931	257.241	265.173	2.42353	0.33741	3	1336	423.237	443.123	446.904	437.755	2.64123	0.0290447	3	1274	1.65083	0.72319	0.0297181
Q9W3C7;S5WMX5	5	1	27.171	0.131261	0.881863	0.0619676	1.20703	0.307663	Experimental_No_Manganese	Control_Manganese	36293	Palmitoyl-protein thioesterase 1 OS=Drosophila melanogaster OX=7227 GN=Ppt1 PE=2 SV=2	263.915	275.053	250.693	263.22	2.42032	0.0463296	3	1338	351.364	262.676	339.101	317.714	2.50204	0.151257	3	1328	1.20703	0.271456	0.129684
A0A0B4K7Q4;Q59E59;A0A0B4JD57;A0A0B4JD95;Q59E58	24	1	105.073	0.875009	0.0579875	0.245362	1.01114	0.0519971	Control_Manganese	Experimental_No_Manganese	233819	Zipper_ isoform I OS=Drosophila melanogaster OX=7227 GN=zip PE=1 SV=1	275.751	235.935	262.282	257.989	2.4116	0.0784987	3	1340	295.099	238.197	232.149	255.148	2.40679	0.136119	3	1359	0.988987	-0.0159765	0.908482
Q9VXK2	4	2	17.1868	0.0646105	1.1897	0.0368161	1.26031	0.486177	Experimental_No_Manganese	Control_Manganese	29584	CG12395-PA OS=Drosophila melanogaster OX=7227 GN=Dmel\CG12395 PE=2 SV=1	214.916	285.042	268.073	256.01	2.40826	0.14291	3	1341	302.908	320.022	345.026	322.652	2.50873	0.0656484	3	1326	1.26031	0.333778	0.0524236
Q9V3E7	2	2	10.3669	0.0672673	1.1722	0.0378336	1.4217	0.475237	Control_Manganese	Experimental_No_Manganese	27851.7	LD24793p OS=Drosophila melanogaster OX=7227 GN=Ref1 PE=1 SV=1	219.286	237.988	306.52	254.598	2.40586	0.180392	3	1342	152.688	171.039	213.515	179.081	2.25305	0.174226	3	1390	0.703385	-0.507613	0.078021
A0A0B4LH69	6	2	27.4475	0.136881	0.863655	0.0635464	1.34112	0.298278	Control_Manganese	Experimental_No_Manganese	109315	Uncharacterized protein_ isoform E OS=Drosophila melanogaster OX=7227 GN=CG5552 PE=4 SV=1	196.508	264.419	299.982	253.636	2.40421	0.207275	3	1343	164.279	222.642	180.447	189.123	2.27674	0.159334	3	1385	0.745646	-0.423438	0.138949
Q9VP77	6	2	26.3751	0.0200074	1.69881	0.0165344	1.66476	0.797142	Experimental_No_Manganese	Control_Manganese	74019.2	LD23875p OS=Drosophila melanogaster OX=7227 GN=Dmel\CG10565 PE=1 SV=1	321.862	210.489	226.56	252.971	2.40307	0.237975	3	1344	463.464	395.207	404.732	421.134	2.62442	0.0877778	3	1282	1.66476	0.735311	0.0145764
M9NCZ5;M9PDV1;P48608	5	3	22.0268	0.00872777	2.0591	0.00974751	1.41681	0.939353	Experimental_No_Manganese	Control_Manganese	124854	Diaphanous_ isoform D OS=Drosophila melanogaster OX=7227 GN=dia PE=1 SV=1	249.114	231.616	272.329	251.02	2.39971	0.0813608	3	1345	332.783	338.191	395.969	355.648	2.55102	0.0984797	3	1310	1.41681	0.502648	0.0110766
Q8IP88	3	1	14.7473	0.0100408	1.99823	0.0106945	1.4004	0.922282	Experimental_No_Manganese	Control_Manganese	20805.8	Uncharacterized protein OS=Drosophila melanogaster OX=7227 GN=Dmel\CG31862 PE=4 SV=1	227.351	277.523	228.932	244.602	2.38846	0.116604	3	1346	363.978	340.649	322.997	342.541	2.53471	0.0600096	3	1315	1.4004	0.485843	0.00849141
Q9VV52	4	2	16.8853	0.0851242	1.06995	0.0447069	1.32665	0.412859	Experimental_No_Manganese	Control_Manganese	126175	LD37257p OS=Drosophila melanogaster OX=7227 GN=RAF2 PE=1 SV=3	238.803	206.159	286.943	243.968	2.38733	0.166573	3	1347	287.308	307.511	376.161	323.66	2.51009	0.143903	3	1325	1.32665	0.407786	0.0893081
Q9V3E0	4	1	20.196	0.047164	1.32639	0.0300234	1.75031	0.573119	Control_Manganese	Experimental_No_Manganese	50671.6	EG:BACR7A4.20 protein OS=Drosophila melanogaster OX=7227 GN=ESTS:99F6T PE=2 SV=1	320.899	190.837	217.798	243.178	2.38592	0.282283	3	1348	149.195	158.073	109.535	138.934	2.14281	0.186018	3	1406	0.571328	-0.807609	0.0695723
Q9VY78	6	4	40.3076	0.000114677	3.94052	0.000659215	2.57697	1	Experimental_No_Manganese	Control_Manganese	30512.1	Chloride intracellular channel_ isoform A OS=Drosophila melanogaster OX=7227 GN=Clic PE=1 SV=1	262.983	213.127	248.721	241.61	2.38312	0.106275	3	1349	617.621	631.893	618.349	622.621	2.79422	0.0129095	3	1171	2.57697	1.36567	1.63963e-05
Q7K2V1;Q8SX87	3	1	18.4233	0.144113	0.841297	0.0659634	1.14023	0.286964	Experimental_No_Manganese	Control_Manganese	85122.6	Atf6_ isoform A OS=Drosophila melanogaster OX=7227 GN=Atf6 PE=2 SV=1	268.73	222.842	230.226	240.599	2.38129	0.102412	3	1350	266.559	298.843	257.617	274.34	2.43829	0.0790497	3	1352	1.14023	0.189331	0.149617
Q7K3P0	4	2	16.3838	0.173427	0.760885	0.0758292	1.31308	0.248249	Experimental_No_Manganese	Control_Manganese	64157.6	Cysteinyl-tRNA synthetase_ mitochondrial_ isoform A OS=Drosophila melanogaster OX=7227 GN=CysRS-m PE=2 SV=1	276.201	231.055	210.259	239.172	2.37871	0.140951	3	1351	266.047	272.436	403.672	314.052	2.497	0.247345	3	1333	1.31308	0.392955	0.200375
Q24179	2	1	9.2574	0.933339	0.0299604	0.258862	1.04181	0.050563	Control_Manganese	Experimental_No_Manganese	72765.1	Protein sly1 homolog OS=Drosophila melanogaster OX=7227 GN=Slh PE=2 SV=4	235.351	154.76	309.834	233.315	2.36794	0.332415	3	1353	214.788	283.692	173.375	223.952	2.35015	0.248832	3	1366	0.959868	-0.0590921	0.873396
Q9V5C6	3	2	12.3339	0.0970095	1.01319	0.0493113	1.24384	0.379644	Experimental_No_Manganese	Control_Manganese	27789.4	Proteasome subunit alpha type-3 OS=Drosophila melanogaster OX=7227 GN=Prosalpha7 PE=1 SV=1	184.986	251.53	250.595	229.037	2.35991	0.166577	3	1354	271.922	298.666	284.066	284.885	2.45467	0.0470038	3	1348	1.24384	0.314798	0.0749781
P48592	3	2	18.5767	0.102143	0.990789	0.0511887	2.42558	0.366865	Experimental_No_Manganese	Control_Manganese	45285.8	Ribonucleoside-diphosphate reductase subunit M2 OS=Drosophila melanogaster OX=7227 GN=RnrS PE=1 SV=2	74.0512	298.366	290.239	220.885	2.34417	0.575987	3	1356	681.311	540.045	385.968	535.775	2.72898	0.275709	3	1215	2.42558	1.27833	0.0489313
Q9VJD4	4	1	19.5148	0.975768	0.0106533	0.267102	1.00221	0.0500742	Control_Manganese	Experimental_No_Manganese	36481.5	LD24721p OS=Drosophila melanogaster OX=7227 GN=Sgt PE=1 SV=1	206.198	270.798	174.993	217.33	2.33712	0.224834	3	1357	216.083	252.845	181.626	216.852	2.33616	0.16424	3	1370	0.997799	-0.0031786	0.989725
Q7K4H1	3	1	13.9009	0.000190627	3.71982	0.000908718	2.21331	1	Experimental_No_Manganese	Control_Manganese	58803.1	LD40680p OS=Drosophila melanogaster OX=7227 GN=CG8185 PE=2 SV=1	197.705	223.259	230.949	217.304	2.33707	0.0800899	3	1358	451.429	513.868	477.59	480.962	2.68211	0.0651937	3	1249	2.21331	1.14621	0.000219095
Q9VKD3	3	2	12.5201	0.404586	0.392989	0.142477	1.28661	0.112519	Control_Manganese	Experimental_No_Manganese	51416.4	Probable cysteine desulfurase_ mitochondrial OS=Drosophila melanogaster OX=7227 GN=CG12264 PE=2 SV=1	211.839	142.909	279.469	211.406	2.32512	0.322986	3	1359	112.913	202.614	177.409	164.312	2.21567	0.281552	3	1393	0.777236	-0.363575	0.378659
Q9VXZ8	2	2	10.084	0.0328915	1.48292	0.0235478	1.89871	0.672334	Experimental_No_Manganese	Control_Manganese	65912.3	BcDNA.GH02901 OS=Drosophila melanogaster OX=7227 GN=pdgy PE=1 SV=2	137.509	230.356	250.535	206.133	2.31415	0.292436	3	1362	359.557	464.398	350.206	391.387	2.59261	0.161993	3	1298	1.89871	0.925018	0.0214343
A0A0B4LFP2;Q9W5T4	2	1	8.9282	0.569178	0.244752	0.181623	1.63073	0.077475	Control_Manganese	Experimental_No_Manganese	69620.5	Uncharacterized protein_ isoform C OS=Drosophila melanogaster OX=7227 GN=anon-EST:Posey268 PE=1 SV=1	231.816	63.0046	322.026	205.615	2.31306	0.639462	3	1363	68.6209	143.324	166.32	126.088	2.10067	0.405107	3	1414	0.613224	-0.705514	0.384099
Q7K2D2	2	1	8.1649	0.80315	0.0952034	0.231353	1.05038	0.0550463	Experimental_No_Manganese	Control_Manganese	42112.4	Dynactin subunit 2 OS=Drosophila melanogaster OX=7227 GN=DCTN2-p50 PE=1 SV=1	188.48	162.48	262.72	204.56	2.31082	0.254297	3	1364	160.997	240.089	243.512	214.866	2.33217	0.217268	3	1373	1.05038	0.0709133	0.811016
Q9VPL5	3	1	12.8413	0.192804	0.714883	0.0821875	1.32218	0.22753	Experimental_No_Manganese	Control_Manganese	82375.5	LD27216p OS=Drosophila melanogaster OX=7227 GN=Tbc1d15-17 PE=1 SV=1	143.163	202.215	255.062	200.147	2.30135	0.279687	3	1365	277.067	297.058	219.764	264.63	2.42264	0.151606	3	1355	1.32218	0.402916	0.180186
P27398;E1JJ98;P27398-5	6	2	28.0571	0.703664	0.152635	0.210583	1.06874	0.0619118	Control_Manganese	Experimental_No_Manganese	177450	Calpain-D OS=Drosophila melanogaster OX=7227 GN=sol PE=1 SV=2	250.648	179.997	169.516	200.053	2.30115	0.220583	3	1366	169.765	192.5	199.294	187.186	2.27227	0.0826167	3	1388	0.935682	-0.0959094	0.658506
M9PCL6;M9PI66;P08761;Q7KUM8;P08761-2;Q7KUN2	6	2	28.5096	0.725712	0.139236	0.214743	1.04714	0.0600973	Control_Manganese	Experimental_No_Manganese	29612.2	Ecdysone-induced protein 28/29kD_ isoform G OS=Drosophila melanogaster OX=7227 GN=Eip71CD PE=1 SV=1	207.756	164.977	217.183	196.639	2.29367	0.141487	3	1368	155.352	209.945	198.061	187.786	2.27366	0.152888	3	1387	0.954979	-0.0664584	0.720835
Q9VCW6	9	6	45.1767	0.000706508	3.15088	0.00198683	2.71	0.999998	Experimental_No_Manganese	Control_Manganese	31757.7	GH03051p OS=Drosophila melanogaster OX=7227 GN=Gclm PE=1 SV=1	209.068	157.942	220.888	195.966	2.29218	0.170724	3	1369	521.917	513.857	557.43	531.068	2.72515	0.0436543	3	1217	2.71	1.43829	0.000140482
Q9V3J4	1	1	5.1799	0.365704	0.43687	0.134067	1.56117	0.125092	Experimental_No_Manganese	Control_Manganese	39869.8	Protein SEC13 homolog OS=Drosophila melanogaster OX=7227 GN=Sec13 PE=1 SV=1	161.476		230.391	195.934	2.29211	0.248708	2	1370	207.135	164.888	239.75	203.924	2.30947	0.18406	3	1378	1.04078	0.0576663	0.846838
Q8IRJ9;Q9W0U0	2	2	4.6775	0.414992	0.38196	0.144708	1.1348	0.109514	Experimental_No_Manganese	Control_Manganese	52397.8	Glycerol kinase 1_ isoform B OS=Drosophila melanogaster OX=7227 GN=Gk1 PE=1 SV=1	202.93	135.865	236.498	191.765	2.28277	0.267188	3	1372	218.641	226.63	207.573	217.614	2.33769	0.0439746	3	1369	1.1348	0.182439	0.438775
Q9VG26	1	1	4.7947	0.150447	0.822616	0.0681446	1.59068	0.277692	Control_Manganese	Experimental_No_Manganese	24229.3	MIP06012p OS=Drosophila melanogaster OX=7227 GN=CG10135 PE=1 SV=2	136.37	243.202	186.42	188.664	2.27569	0.283317	3	1373	81.2435	105.143	169.43	118.606	2.07411	0.384539	3	1417	0.62866	-0.669648	0.159249
Q9VMG0	2	1	11.236	0.0868091	1.06143	0.0453651	1.86384	0.407807	Experimental_No_Manganese	Control_Manganese	24531.1	Arylalkylamine N-acyltransferase-like 2_ isoform A OS=Drosophila melanogaster OX=7227 GN=AANATL2 PE=4 SV=1	310.941	110.634	141.58	187.718	2.27351	0.574426	3	1374	356.725	386.212	306.692	349.877	2.54391	0.114898	3	1311	1.86384	0.898278	0.0711607
X2JCU8;Q29R20;R9PY29	4	1	17.163	0.780222	0.107782	0.226773	1.4438	0.0563395	Control_Manganese	Experimental_No_Manganese	105317	Dipeptidase OS=Drosophila melanogaster OX=7227 GN=CG14126 PE=3 SV=1	53.1391	265.539	243.635	187.438	2.27286	0.62325	3	1375	136.906	108.39	144.17	129.822	2.11335	0.145681	3	1410	0.692615	-0.529875	0.446556
A0A0B4K782;A0A0B4K7U4;A0A0B4K835;A0A0B4KET3;A0A0B4KF98;A0A0B4KFA2;A0A0B4KG51;B7YZI9;B7YZJ0;I7BCJ6;O16011;O16011-2;O16011-3	2	2	9.5051	0.628806	0.201483	0.193846	1.09625	0.0695219	Experimental_No_Manganese	Control_Manganese	91487.9	Muscleblind_ isoform M OS=Drosophila melanogaster OX=7227 GN=mbl PE=4 SV=1	362.434	117.674	80.0133	186.707	2.27116	0.821311	3	1376	279.933	200.873	133.229	204.678	2.31107	0.358738	3	1377	1.09625	0.132581	0.86364
[truncated: 45 more rows]

## Sheet: Experiment 2
Accession	Peptide count	Unique peptides	Confidence score	Anova (p)	nlog10.Anova	q Value	Max fold change	Power	Highest mean condition	Lowest mean condition	Mass	Description	20190821_UDMSE_Control_Manganese_R001	20190821_UDMSE_Control_Manganese_R002	20190821_UDMSE_Control_Manganese_R003	Average.Intensity.Control	log10.Average.Intensity.Control	CV.Control	Count.Control	IDs. Control	20190821_UDMSE_Experimental_No_Manganese_R001	20190821_UDMSE_Experimental_No_Manganese_R002	20190821_UDMSE_Experimental_No_Manganese_R003	Average.Intensity.Experimental	log10.Average.Intensity.Experimental	CV.Experimental	Count.Experimental	IDs. Experimental	Ratio (Experimental/Control)	log2.ratio
[truncated: 884 more rows]

[truncated: 3 more sheets: Experiment 2 normalized, Both Experiments Normalized, Only proteins present in both]
